# Supplementary material for: Plant Nutrient Resource Use Strategies Shape Active Rhizosphere Microbiota Through Root Exudation
Source: Front Plant Sci. 2018 Nov 23;9:1662. doi: 10.3389/fpls.2018.01662 (PMC6265440; doi:10.3389/fpls.2018.01662)
Supplement: Table S10 — Taxonomic affiliation of OTUs retrieved from root-DNA fractions (root exudate consumers): (file 1) shared by exploitative (DG, BE, AO and TF) and conservative plants (FP and SC) and representing the core microbiota; (file 2) present in exploitative plants only; (file 3) present in conservative plants only. [file Table_10.xlsx]

## Sheet: Venn
Root exudates consumers (Root-DNA)

## Sheet: Root_DNA Commun
	x
1	1134664$$[u'k__Bacteria', u'p__Proteobacteria', u'c__Betaproteobacteria', u'o__Burkholderiales', u'f__Comamonadaceae', u'g__Methylibium', u's__']
2	4440262$$[u'k__Bacteria', u'p__Proteobacteria', u'c__Betaproteobacteria', u'o__MND1', u'f__', u'g__', u's__']
3	2650464$$[u'k__Bacteria', u'p__Proteobacteria', u'c__Alphaproteobacteria', u'o__Caulobacterales', u'f__Caulobacteraceae']
4	709657$$[u'k__Bacteria', u'p__Proteobacteria', u'c__Alphaproteobacteria', u'o__Rhodospirillales', u'f__Rhodospirillaceae', u'g__', u's__']
5	4416537$$[u'k__Bacteria', u'p__Acidobacteria', u'c__Sva0725', u'o__Sva0725', u'f__', u'g__', u's__']
6	519510$$[u'k__Bacteria', u'p__Proteobacteria', u'c__Alphaproteobacteria', u'o__Sphingomonadales', u'f__Erythrobacteraceae', u'g__', u's__']
7	737110$$[u'k__Bacteria', u'p__Proteobacteria', u'c__Gammaproteobacteria', u'o__Xanthomonadales', u'f__Xanthomonadaceae', u'g__', u's__']
8	98457$$[u'k__Bacteria', u'p__Proteobacteria', u'c__Alphaproteobacteria', u'o__Rhizobiales']
9	539866$$[u'k__Bacteria', u'p__Proteobacteria', u'c__Gammaproteobacteria', u'o__Thiotrichales', u'f__Piscirickettsiaceae', u'g__', u's__']
10	825112$$[u'k__Bacteria', u'p__Actinobacteria', u'c__Acidimicrobiia', u'o__Acidimicrobiales', u'f__C111', u'g__', u's__']
11	4343394$$[u'k__Bacteria', u'p__Proteobacteria', u'c__Alphaproteobacteria', u'o__Sphingomonadales', u'f__Erythrobacteraceae']
12	223787$$[u'k__Bacteria', u'p__Actinobacteria', u'c__Actinobacteria', u'o__Actinomycetales', u'f__Microbacteriaceae']
13	1125837$$[u'k__Bacteria', u'p__Proteobacteria', u'c__Alphaproteobacteria', u'o__Rhizobiales', u'f__Hyphomicrobiaceae', u'g__Rhodoplanes', u's__']
14	1673321$$[u'k__Bacteria', u'p__Proteobacteria', u'c__Betaproteobacteria', u'o__Burkholderiales', u'f__Comamonadaceae', u'g__Methylibium', u's__']
15	625652$$[u'k__Bacteria', u'p__Proteobacteria', u'c__Alphaproteobacteria', u'o__Rhizobiales']
16	1140286$$[u'k__Bacteria', u'p__Proteobacteria', u'c__Betaproteobacteria', u'o__Burkholderiales', u'f__Comamonadaceae']
17	915240$$[u'k__Bacteria', u'p__Actinobacteria', u'c__Actinobacteria', u'o__Actinomycetales', u'f__Kineosporiaceae', u'g__', u's__']
18	4324432$$[u'k__Bacteria', u'p__Actinobacteria', u'c__Actinobacteria', u'o__Actinomycetales', u'f__Nocardioidaceae', u'g__Nocardioides', u's__furvisabuli']
19	545121$$[u'k__Bacteria', u'p__Proteobacteria', u'c__Betaproteobacteria', u'o__SC-I-84', u'f__', u'g__', u's__']
20	810096$$[u'k__Bacteria', u'p__Proteobacteria', u'c__Alphaproteobacteria', u'o__Sphingomonadales', u'f__Sphingomonadaceae', u'g__Sphingomonas', u's__']
21	209762$$[u'k__Bacteria', u'p__Proteobacteria', u'c__Alphaproteobacteria', u'o__Caulobacterales', u'f__Caulobacteraceae', u'g__Phenylobacterium', u's__']
22	527397$$[u'k__Bacteria', u'p__Proteobacteria', u'c__Gammaproteobacteria', u'o__Xanthomonadales', u'f__Sinobacteraceae', u'g__', u's__']
23	750263$$[u'k__Bacteria', u'p__Proteobacteria', u'c__Alphaproteobacteria', u'o__Rhizobiales', u'f__', u'g__', u's__']
24	4359889$$[u'k__Bacteria', u'p__Acidobacteria', u'c__Solibacteres', u'o__Solibacterales', u'f__Solibacteraceae', u'g__Candidatus Solibacter', u's__']
25	1059762$$[u'k__Bacteria', u'p__Proteobacteria', u'c__Gammaproteobacteria', u'o__Xanthomonadales', u'f__Sinobacteraceae', u'g__', u's__']
26	4380522$$[u'k__Bacteria', u'p__Proteobacteria', u'c__Alphaproteobacteria', u'o__Rhizobiales', u'f__Hyphomicrobiaceae']
27	589946$$[u'k__Bacteria', u'p__Proteobacteria', u'c__Alphaproteobacteria', u'o__Rhodobacterales']
28	103580$$[u'k__Bacteria', u'p__Acidobacteria', u'c__Solibacteres', u'o__Solibacterales', u'f__', u'g__', u's__']
29	4018589$$[u'k__Bacteria', u'p__Verrucomicrobia', u'c__Opitutae', u'o__Opitutales', u'f__Opitutaceae', u'g__Opitutus', u's__']
30	4326152$$[u'k__Bacteria', u'p__Proteobacteria', u'c__Alphaproteobacteria', u'o__Rhizobiales', u'f__Hyphomicrobiaceae', u'g__Rhodoplanes', u's__']
31	4465887$$[u'k__Bacteria', u'p__Acidobacteria', u'c__[Chloracidobacteria]', u'o__PK29', u'f__', u'g__', u's__']
32	548961$$[u'k__Bacteria', u'p__Proteobacteria', u'c__Gammaproteobacteria']
33	4338661$$[u'k__Bacteria', u'p__Proteobacteria', u'c__Alphaproteobacteria', u'o__Rhizobiales', u'f__Rhizobiaceae', u'g__Rhizobium']
34	542933$$[u'k__Bacteria', u'p__Actinobacteria', u'c__Acidimicrobiia', u'o__Acidimicrobiales', u'f__EB1017', u'g__', u's__']
35	142384$$[u'k__Bacteria', u'p__Proteobacteria', u'c__Betaproteobacteria', u'o__A21b', u'f__UD5', u'g__', u's__']
36	328957$$[u'k__Bacteria', u'p__Nitrospirae', u'c__Nitrospira', u'o__Nitrospirales', u'f__0319-6A21', u'g__', u's__']
37	4436954$$[u'k__Bacteria', u'p__Proteobacteria', u'c__Alphaproteobacteria', u'o__Rhizobiales', u'f__Hyphomicrobiaceae', u'g__Devosia', u's__']
38	4319933$$[u'k__Bacteria', u'p__Proteobacteria', u'c__Alphaproteobacteria', u'o__Caulobacterales', u'f__Caulobacteraceae', u'g__Phenylobacterium', u's__']
39	3843950$$[u'k__Bacteria', u'p__Actinobacteria', u'c__Actinobacteria', u'o__Actinomycetales', u'f__Streptomycetaceae']
40	92573$$[u'k__Bacteria', u'p__Proteobacteria', u'c__Alphaproteobacteria', u'o__Rhizobiales', u'f__Bradyrhizobiaceae']
41	574749$$[u'k__Bacteria', u'p__Proteobacteria', u'c__Alphaproteobacteria', u'o__Rhizobiales', u'f__Rhizobiaceae']
42	238766$$[u'k__Bacteria', u'p__Chloroflexi', u'c__Chloroflexi', u'o__[Roseiflexales]', u'f__[Kouleothrixaceae]', u'g__', u's__']
43	4371756$$[u'k__Bacteria', u'p__Proteobacteria', u'c__Alphaproteobacteria', u'o__Sphingomonadales', u'f__Erythrobacteraceae']
44	4412910$$[u'k__Bacteria', u'p__Proteobacteria', u'c__Alphaproteobacteria', u'o__Sphingomonadales', u'f__Sphingomonadaceae', u'g__', u's__']
45	4395040$$[u'k__Bacteria', u'p__Acidobacteria', u'c__Solibacteres', u'o__Solibacterales', u'f__[Bryobacteraceae]', u'g__', u's__']
46	4395045$$[u'k__Bacteria', u'p__Acidobacteria', u'c__Solibacteres', u'o__Solibacterales', u'f__', u'g__', u's__']
47	4395046$$[u'k__Bacteria', u'p__Proteobacteria', u'c__Alphaproteobacteria', u'o__Rhodospirillales', u'f__Rhodospirillaceae', u'g__', u's__']
48	305915$$[u'k__Bacteria', u'p__Proteobacteria', u'c__Betaproteobacteria', u'o__Burkholderiales', u'f__Comamonadaceae', u'g__Rubrivivax', u's__']
49	240866$$[u'k__Bacteria', u'p__Proteobacteria', u'c__Alphaproteobacteria', u'o__Rhodospirillales', u'f__Rhodospirillaceae', u'g__', u's__']
50	113232$$[u'k__Bacteria', u'p__Chloroflexi', u'c__Ellin6529', u'o__', u'f__', u'g__', u's__']
51	1131157$$[u'k__Bacteria', u'p__Proteobacteria', u'c__Alphaproteobacteria', u'o__Sphingomonadales', u'f__Sphingomonadaceae']
52	336824$$[u'k__Bacteria', u'p__Proteobacteria', u'c__Betaproteobacteria', u'o__Burkholderiales', u'f__Comamonadaceae', u'g__Methylibium', u's__']
53	1081489$$[u'k__Bacteria', u'p__Fibrobacteres', u'c__Fibrobacteria', u'o__258ds10', u'f__', u'g__', u's__']
54	201900$$[u'k__Bacteria', u'p__Proteobacteria', u'c__Alphaproteobacteria', u'o__Rhodospirillales', u'f__Rhodospirillaceae', u'g__Magnetospirillum', u's__']
55	563192$$[u'k__Bacteria', u'p__Actinobacteria', u'c__Acidimicrobiia', u'o__Acidimicrobiales', u'f__C111', u'g__', u's__']
56	810126$$[u'k__Bacteria', u'p__Proteobacteria', u'c__Alphaproteobacteria']
57	216191$$[u'k__Bacteria', u'p__Planctomycetes', u'c__Phycisphaerae', u'o__WD2101', u'f__', u'g__', u's__']
58	811187$$[u'k__Bacteria', u'p__Acidobacteria', u'c__Acidobacteria-6', u'o__iii1-15', u'f__', u'g__', u's__']
59	212676$$[u'k__Bacteria', u'p__Acidobacteria', u'c__Acidobacteria-6', u'o__iii1-15', u'f__', u'g__', u's__']
60	819400$$[u'k__Bacteria', u'p__Proteobacteria', u'c__Betaproteobacteria', u'o__Burkholderiales', u'f__Comamonadaceae']
61	539336$$[u'k__Bacteria', u'p__Acidobacteria', u'c__PAUC37f', u'o__', u'f__', u'g__', u's__']
62	759624$$[u'k__Bacteria', u'p__Proteobacteria', u'c__Betaproteobacteria', u'o__Burkholderiales', u'f__Oxalobacteraceae']
63	226240$$[u'k__Bacteria', u'p__Verrucomicrobia', u'c__Opitutae', u'o__Opitutales', u'f__Opitutaceae', u'g__', u's__']
64	3412843$$[u'k__Bacteria', u'p__Proteobacteria', u'c__Alphaproteobacteria', u'o__Rhodospirillales', u'f__Rhodospirillaceae', u'g__', u's__']
65	4422734$$[u'k__Bacteria', u'p__Proteobacteria', u'c__Alphaproteobacteria', u'o__Rhizobiales', u'f__', u'g__', u's__']
66	1106653$$[u'k__Bacteria', u'p__Proteobacteria', u'c__Gammaproteobacteria', u'o__Xanthomonadales', u'f__Sinobacteraceae', u'g__', u's__']
67	112886$$[u'k__Bacteria', u'p__Bacteroidetes', u'c__[Saprospirae]', u'o__[Saprospirales]', u'f__Chitinophagaceae', u'g__', u's__']
68	4377596$$[u'k__Bacteria', u'p__Proteobacteria', u'c__Deltaproteobacteria', u'o__Desulfobacterales', u'f__Desulfobulbaceae', u'g__', u's__']
69	539978$$[u'k__Bacteria', u'p__Actinobacteria', u'c__Thermoleophilia', u'o__Gaiellales', u'f__Gaiellaceae', u'g__', u's__']
70	4424338$$[u'k__Bacteria', u'p__Proteobacteria', u'c__Alphaproteobacteria', u'o__Rhizobiales', u'f__Hyphomicrobiaceae', u'g__', u's__']
71	279203$$[u'k__Bacteria', u'p__Planctomycetes', u'c__Planctomycetia', u'o__Gemmatales', u'f__Gemmataceae', u'g__Gemmata', u's__']
72	529762$$[u'k__Bacteria', u'p__Actinobacteria', u'c__Actinobacteria', u'o__Actinomycetales', u'f__Mycobacteriaceae', u'g__Mycobacterium', u's__']
73	336298$$[u'k__Bacteria', u'p__Actinobacteria', u'c__Actinobacteria', u'o__Actinomycetales', u'f__Streptomycetaceae']
74	4402900$$[u'k__Bacteria', u'p__Proteobacteria', u'c__Alphaproteobacteria', u'o__Rhizobiales']
75	253948$$[u'k__Bacteria', u'p__Proteobacteria', u'c__Betaproteobacteria', u'o__SC-I-84', u'f__', u'g__', u's__']
76	4396454$$[u'k__Bacteria', u'p__Proteobacteria', u'c__Betaproteobacteria', u'o__Burkholderiales', u'f__Comamonadaceae', u'g__Methylibium', u's__']
77	4308332$$[u'k__Bacteria', u'p__Proteobacteria', u'c__Alphaproteobacteria', u'o__Rhizobiales', u'f__', u'g__', u's__']
78	100543$$[u'k__Bacteria', u'p__Proteobacteria', u'c__Betaproteobacteria', u'o__Rhodocyclales', u'f__Rhodocyclaceae', u'g__Propionivibrio', u's__']
79	849863$$[u'k__Bacteria', u'p__Proteobacteria', u'c__Alphaproteobacteria', u'o__Sphingomonadales', u'f__Sphingomonadaceae', u'g__Kaistobacter', u's__']
80	512674$$[u'k__Bacteria', u'p__Verrucomicrobia', u'c__[Spartobacteria]', u'o__[Chthoniobacterales]', u'f__[Chthoniobacteraceae]', u'g__', u's__']
81	837424$$[u'k__Bacteria', u'p__Proteobacteria', u'c__Alphaproteobacteria', u'o__Rhodobacterales', u'f__Hyphomonadaceae', u'g__', u's__']
82	4296290$$[u'k__Bacteria', u'p__Proteobacteria', u'c__Betaproteobacteria', u'o__Burkholderiales', u'f__Comamonadaceae', u'g__Rhodoferax', u's__']
83	539878$$[u'k__Bacteria', u'p__Proteobacteria', u'c__Alphaproteobacteria', u'o__Rhizobiales', u'f__Phyllobacteriaceae']
84	1134925$$[u'k__Bacteria', u'p__Bacteroidetes', u'c__Cytophagia', u'o__Cytophagales', u'f__Cytophagaceae', u'g__', u's__']
85	546972$$[u'k__Bacteria', u'p__Actinobacteria', u'c__Actinobacteria', u'o__Actinomycetales', u'f__Mycobacteriaceae', u'g__Mycobacterium', u's__']
86	4467262$$[u'k__Bacteria', u'p__Acidobacteria', u'c__Acidobacteria-5', u'o__', u'f__', u'g__', u's__']
87	1134389$$[u'k__Bacteria', u'p__Bacteroidetes', u'c__Flavobacteriia', u'o__Flavobacteriales', u'f__Flavobacteriaceae', u'g__Flavobacterium', u's__succinicans']
88	112867$$[u'k__Bacteria', u'p__Chloroflexi', u'c__Ellin6529', u'o__', u'f__', u'g__', u's__']
89	4465677$$[u'k__Bacteria', u'p__Acidobacteria', u'c__iii1-8', u'o__DS-18', u'f__', u'g__', u's__']
90	4386631$$[u'k__Bacteria', u'p__Proteobacteria', u'c__Betaproteobacteria', u'o__Burkholderiales', u'f__Comamonadaceae', u'g__Methylibium', u's__']
91	2742255$$[u'k__Bacteria', u'p__Proteobacteria', u'c__Betaproteobacteria', u'o__Burkholderiales', u'f__Comamonadaceae', u'g__Rhodoferax', u's__']
92	277521$$[u'k__Bacteria', u'p__Proteobacteria', u'c__Betaproteobacteria', u'o__Burkholderiales', u'f__Comamonadaceae', u'g__Methylibium']
93	3469796$$[u'k__Bacteria', u'p__Acidobacteria', u'c__Solibacteres', u'o__Solibacterales', u'f__Solibacteraceae', u'g__Candidatus Solibacter', u's__']
94	329490$$[u'k__Bacteria', u'p__Actinobacteria', u'c__Actinobacteria', u'o__Actinomycetales', u'f__Actinosynnemataceae']
95	789526$$[u'k__Bacteria', u'p__Proteobacteria', u'c__Betaproteobacteria', u'o__Burkholderiales', u'f__Comamonadaceae']
96	1108652$$[u'k__Bacteria', u'p__Proteobacteria', u'c__Betaproteobacteria', u'o__Rhodocyclales', u'f__Rhodocyclaceae', u'g__Dechloromonas', u's__']
97	207216$$[u'k__Bacteria', u'p__Proteobacteria', u'c__Alphaproteobacteria', u'o__Rhizobiales', u'f__Hyphomicrobiaceae']
98	217700$$[u'k__Bacteria', u'p__Armatimonadetes', u'c__[Fimbriimonadia]', u'o__[Fimbriimonadales]', u'f__[Fimbriimonadaceae]', u'g__Fimbriimonas', u's__']
99	849821$$[u'k__Bacteria', u'p__Chloroflexi', u'c__Ellin6529', u'o__', u'f__', u'g__', u's__']
100	104916$$[u'k__Bacteria', u'p__Proteobacteria', u'c__Betaproteobacteria', u'o__SC-I-84', u'f__', u'g__', u's__']
101	136777$$[u'k__Bacteria', u'p__Proteobacteria', u'c__Betaproteobacteria', u'o__Burkholderiales', u'f__Comamonadaceae']
102	693971$$[u'k__Bacteria', u'p__Acidobacteria', u'c__Solibacteres', u'o__Solibacterales', u'f__', u'g__', u's__']
103	4379114$$[u'k__Bacteria', u'p__Proteobacteria', u'c__Deltaproteobacteria', u'o__Desulfuromonadales']
104	613333$$[u'k__Bacteria', u'p__Planctomycetes', u'c__Planctomycetia', u'o__Pirellulales', u'f__Pirellulaceae', u'g__A17', u's__']
105	153255$$[u'k__Bacteria', u'p__Proteobacteria', u'c__Betaproteobacteria', u'o__Rhodocyclales', u'f__Rhodocyclaceae', u'g__Dechloromonas', u's__']
106	410072$$[u'k__Bacteria', u'p__Actinobacteria', u'c__Acidimicrobiia', u'o__Acidimicrobiales', u'f__', u'g__', u's__']
107	2618782$$[u'k__Bacteria', u'p__Chloroflexi', u'c__TK10', u'o__AKYG885', u'f__Dolo_23', u'g__', u's__']
108	616682$$[u'k__Bacteria', u'p__Proteobacteria', u'c__Alphaproteobacteria', u'o__Rhizobiales', u'f__Hyphomicrobiaceae', u'g__Rhodoplanes', u's__']
109	4258048$$[u'k__Bacteria', u'p__Proteobacteria', u'c__Alphaproteobacteria', u'o__Sphingomonadales', u'f__Sphingomonadaceae', u'g__Kaistobacter', u's__']
110	805654$$[u'k__Bacteria', u'p__Planctomycetes', u'c__Phycisphaerae', u'o__Phycisphaerales', u'f__', u'g__', u's__']
111	4465329$$[u'k__Bacteria', u'p__Bacteroidetes', u'c__[Saprospirae]', u'o__[Saprospirales]', u'f__Saprospiraceae', u'g__', u's__']
112	358280$$[u'k__Bacteria', u'p__Bacteroidetes', u'c__[Saprospirae]', u'o__[Saprospirales]', u'f__Chitinophagaceae']
113	114289$$[u'k__Bacteria', u'p__Bacteroidetes', u'c__[Saprospirae]', u'o__[Saprospirales]', u'f__Chitinophagaceae', u'g__', u's__']
114	838721$$[u'k__Bacteria', u'p__Actinobacteria', u'c__Actinobacteria', u'o__Actinomycetales', u'f__Intrasporangiaceae']
115	1120116$$[u'k__Bacteria', u'p__Verrucomicrobia', u'c__[Pedosphaerae]', u'o__[Pedosphaerales]', u'f__auto67_4W', u'g__', u's__']
116	223418$$[u'k__Bacteria', u'p__Actinobacteria', u'c__Actinobacteria', u'o__Actinomycetales', u'f__Geodermatophilaceae', u'g__', u's__']
117	1638797$$[u'k__Bacteria', u'p__Proteobacteria', u'c__Alphaproteobacteria', u'o__Rhizobiales', u'f__Hyphomicrobiaceae', u'g__Rhodoplanes', u's__']
118	82007$$[u'k__Bacteria', u'p__Chloroflexi', u'c__Ellin6529', u'o__', u'f__', u'g__', u's__']
119	750320$$[u'k__Bacteria', u'p__Proteobacteria', u'c__Deltaproteobacteria', u'o__Myxococcales', u'f__Polyangiaceae', u'g__Sorangium', u's__cellulosum']
120	4330047$$[u'k__Bacteria', u'p__Acidobacteria', u'c__Acidobacteria-6']
121	813575$$[u'k__Bacteria', u'p__Proteobacteria', u'c__Betaproteobacteria', u'o__Burkholderiales', u'f__Comamonadaceae']
122	156210$$[u'k__Bacteria', u'p__Verrucomicrobia', u'c__Opitutae', u'o__Opitutales', u'f__Opitutaceae', u'g__Opitutus', u's__']
123	1119166$$[u'k__Bacteria', u'p__Proteobacteria', u'c__Betaproteobacteria', u'o__IS-44', u'f__', u'g__', u's__']
124	545997$$[u'k__Bacteria', u'p__Proteobacteria', u'c__Betaproteobacteria', u'o__Burkholderiales', u'f__Comamonadaceae']
125	512840$$[u'k__Bacteria', u'p__Proteobacteria', u'c__Alphaproteobacteria', u'o__Rhodospirillales', u'f__Rhodospirillaceae', u'g__', u's__']
126	211507$$[u'k__Bacteria', u'p__Actinobacteria', u'c__Actinobacteria', u'o__Actinomycetales', u'f__Nocardioidaceae', u'g__', u's__']
127	4340498$$[u'k__Bacteria', u'p__Actinobacteria', u'c__Actinobacteria', u'o__Actinomycetales', u'f__Cellulomonadaceae', u'g__Cellulomonas', u's__']
128	779751$$[u'k__Bacteria', u'p__Proteobacteria', u'c__Betaproteobacteria', u'o__Rhodocyclales', u'f__Rhodocyclaceae', u'g__Dechloromonas', u's__']
129	2362284$$[u'k__Bacteria', u'p__Proteobacteria', u'c__Deltaproteobacteria', u'o__Myxococcales', u'f__', u'g__', u's__']
130	1044319$$[u'k__Bacteria', u'p__Bacteroidetes', u'c__[Saprospirae]', u'o__[Saprospirales]', u'f__Chitinophagaceae']
131	4318219$$[u'k__Bacteria', u'p__Proteobacteria', u'c__Alphaproteobacteria', u'o__Rhizobiales', u'f__Hyphomicrobiaceae', u'g__Rhodoplanes', u's__']
132	1148345$$[u'k__Bacteria', u'p__Proteobacteria', u'c__Betaproteobacteria', u'o__Burkholderiales', u'f__Comamonadaceae']
133	4418009$$[u'k__Bacteria', u'p__Proteobacteria', u'c__Betaproteobacteria', u'o__Burkholderiales', u'f__Oxalobacteraceae', u'g__Janthinobacterium', u's__']
134	331647$$[u'k__Bacteria', u'p__Proteobacteria', u'c__Alphaproteobacteria', u'o__Rhodospirillales', u'f__Rhodospirillaceae', u'g__', u's__']
135	692246$$[u'k__Bacteria', u'p__Acidobacteria', u'c__Solibacteres', u'o__Solibacterales', u'f__Solibacteraceae', u'g__Candidatus Solibacter', u's__']
136	436590$$[u'k__Bacteria', u'p__Proteobacteria', u'c__Gammaproteobacteria', u'o__Xanthomonadales', u'f__Sinobacteraceae', u'g__', u's__']
137	255112$$[u'k__Bacteria', u'p__Verrucomicrobia', u'c__Verrucomicrobiae', u'o__Verrucomicrobiales', u'f__Verrucomicrobiaceae', u'g__Luteolibacter', u's__']
138	217929$$[u'k__Bacteria', u'p__Verrucomicrobia', u'c__[Pedosphaerae]', u'o__[Pedosphaerales]', u'f__', u'g__', u's__']
139	208424$$[u'k__Bacteria', u'p__Proteobacteria', u'c__Betaproteobacteria', u'o__Burkholderiales', u'f__Comamonadaceae']
140	4377104$$[u'k__Bacteria', u'p__Proteobacteria', u'c__Alphaproteobacteria', u'o__Rhizobiales', u'f__Bradyrhizobiaceae', u'g__Bradyrhizobium', u's__']
141	2920135$$[u'k__Bacteria', u'p__Proteobacteria', u'c__Alphaproteobacteria', u'o__Rhizobiales', u'f__Hyphomicrobiaceae', u'g__Devosia', u's__']
142	101542$$[u'k__Bacteria', u'p__Proteobacteria', u'c__Alphaproteobacteria', u'o__Rhizobiales', u'f__Hyphomicrobiaceae', u'g__Rhodoplanes', u's__']
143	751555$$[u'k__Bacteria', u'p__Proteobacteria', u'c__Alphaproteobacteria', u'o__Rhodospirillales', u'f__Rhodospirillaceae', u'g__', u's__']
144	339660$$[u'k__Bacteria', u'p__Proteobacteria', u'c__Gammaproteobacteria', u'o__Xanthomonadales', u'f__Sinobacteraceae', u'g__', u's__']
145	814704$$[u'k__Bacteria', u'p__Proteobacteria', u'c__Betaproteobacteria', u'o__Burkholderiales', u'f__Comamonadaceae', u'g__Methylibium']
146	3359685$$[u'k__Bacteria', u'p__Actinobacteria', u'c__Actinobacteria', u'o__Actinomycetales', u'f__Microbacteriaceae', u'g__Agromyces', u's__']
147	114209$$[u'k__Bacteria', u'p__Proteobacteria', u'c__Betaproteobacteria', u'o__Ellin6067', u'f__', u'g__', u's__']
148	239581$$[u'k__Bacteria', u'p__Proteobacteria', u'c__Deltaproteobacteria', u'o__Myxococcales', u'f__Haliangiaceae', u'g__', u's__']
149	354224$$[u'k__Bacteria', u'p__Acidobacteria', u'c__Acidobacteriia', u'o__Acidobacteriales', u'f__Koribacteraceae', u'g__', u's__']
150	1546879$$[u'k__Bacteria', u'p__Actinobacteria', u'c__Actinobacteria', u'o__Actinomycetales', u'f__Micromonosporaceae', u'g__Dactylosporangium', u's__']
151	206752$$[u'k__Bacteria', u'p__Bacteroidetes', u'c__[Saprospirae]', u'o__[Saprospirales]', u'f__Chitinophagaceae', u'g__', u's__']
152	3849735$$[u'k__Bacteria', u'p__Proteobacteria', u'c__Alphaproteobacteria', u'o__Rhizobiales', u'f__Bradyrhizobiaceae', u'g__Balneimonas', u's__']
153	250724$$[u'k__Bacteria', u'p__Actinobacteria', u'c__Actinobacteria', u'o__Actinomycetales', u'f__Streptomycetaceae', u'g__Streptomyces', u's__mirabilis']
154	102749$$[u'k__Bacteria', u'p__Fibrobacteres', u'c__Fibrobacteria', u'o__258ds10', u'f__', u'g__', u's__']
155	829415$$[u'k__Bacteria', u'p__Proteobacteria', u'c__Alphaproteobacteria', u'o__Rhizobiales', u'f__Bradyrhizobiaceae', u'g__Bradyrhizobium', u's__']
156	807804$$[u'k__Bacteria', u'p__Acidobacteria', u'c__Solibacteres', u'o__Solibacterales', u'f__', u'g__', u's__']
157	265094$$[u'k__Bacteria', u'p__Actinobacteria', u'c__Actinobacteria', u'o__Actinomycetales', u'f__Micromonosporaceae']
158	365415$$[u'k__Bacteria', u'p__Proteobacteria', u'c__Gammaproteobacteria', u'o__Xanthomonadales', u'f__Sinobacteraceae', u'g__Steroidobacter', u's__']
159	3116364$$[u'k__Bacteria', u'p__Acidobacteria', u'c__Acidobacteriia', u'o__Acidobacteriales', u'f__Koribacteraceae', u'g__Candidatus Koribacter', u's__']
160	562973$$[u'k__Bacteria', u'p__Actinobacteria', u'c__Actinobacteria', u'o__Actinomycetales', u'f__Streptomycetaceae']
161	1125869$$[u'k__Bacteria', u'p__Proteobacteria', u'c__Betaproteobacteria', u'o__Burkholderiales', u'f__Comamonadaceae']
162	156886$$[u'k__Bacteria', u'p__Proteobacteria', u'c__Alphaproteobacteria', u'o__Ellin329', u'f__', u'g__', u's__']
163	215825$$[u'k__Bacteria', u'p__Proteobacteria', u'c__Alphaproteobacteria', u'o__Ellin329', u'f__', u'g__', u's__']
164	494339$$[u'k__Bacteria', u'p__Proteobacteria', u'c__Alphaproteobacteria', u'o__Sphingomonadales', u'f__Sphingomonadaceae', u'g__Sphingomonas', u's__wittichii']
165	249571$$[u'k__Bacteria', u'p__Actinobacteria', u'c__Actinobacteria', u'o__Actinomycetales', u'f__Micromonosporaceae']
166	128192$$[u'k__Bacteria', u'p__Proteobacteria', u'c__Alphaproteobacteria', u'o__Rhizobiales', u'f__Hyphomicrobiaceae', u'g__Rhodoplanes', u's__']
167	4349251$$[u'k__Bacteria', u'p__Bacteroidetes', u'c__Cytophagia', u'o__Cytophagales', u'f__Cytophagaceae', u'g__', u's__']
168	18516$$[u'k__Bacteria', u'p__Proteobacteria', u'c__Gammaproteobacteria', u'o__Xanthomonadales', u'f__Sinobacteraceae', u'g__', u's__']
169	4339472$$[u'k__Bacteria', u'p__Bacteroidetes', u'c__Cytophagia', u'o__Cytophagales', u'f__Cytophagaceae', u'g__', u's__']
170	4470872$$[u'k__Bacteria', u'p__Proteobacteria', u'c__Betaproteobacteria', u'o__Burkholderiales', u'f__Comamonadaceae', u'g__Rubrivivax', u's__']
171	2025156$$[u'k__Bacteria', u'p__Proteobacteria', u'c__Alphaproteobacteria', u'o__Rhizobiales', u'f__Hyphomicrobiaceae', u'g__Rhodoplanes', u's__']
172	2442916$$[u'k__Bacteria', u'p__Actinobacteria', u'c__Acidimicrobiia', u'o__Acidimicrobiales', u'f__', u'g__', u's__']
173	220353$$[u'k__Bacteria', u'p__Chloroflexi', u'c__Chloroflexi', u'o__[Roseiflexales]', u'f__[Kouleothrixaceae]', u'g__', u's__']
174	718335$$[u'k__Bacteria', u'p__Actinobacteria', u'c__Acidimicrobiia', u'o__Acidimicrobiales', u'f__C111', u'g__', u's__']
175	314599$$[u'k__Bacteria', u'p__Gemmatimonadetes', u'c__Gemm-1', u'o__', u'f__', u'g__', u's__']
176	1109121$$[u'k__Bacteria', u'p__Proteobacteria', u'c__Alphaproteobacteria', u'o__Rhizobiales', u'f__Hyphomicrobiaceae', u'g__Rhodoplanes', u's__']
177	2802748$$[u'k__Bacteria', u'p__Proteobacteria', u'c__Alphaproteobacteria', u'o__Rhizobiales', u'f__Phyllobacteriaceae', u'g__Aminobacter', u's__']
178	791504$$[u'k__Bacteria', u'p__Acidobacteria', u'c__Acidobacteria-6']
179	4447334$$[u'k__Bacteria', u'p__Proteobacteria', u'c__Alphaproteobacteria', u'o__Sphingomonadales', u'f__Sphingomonadaceae', u'g__Kaistobacter', u's__']
180	3237752$$[u'k__Bacteria', u'p__Proteobacteria', u'c__Gammaproteobacteria', u'o__Xanthomonadales', u'f__Sinobacteraceae', u'g__', u's__']
181	3616120$$[u'k__Bacteria', u'p__Acidobacteria', u'c__Acidobacteria-6', u'o__CCU21', u'f__', u'g__', u's__']
182	591683$$[u'k__Bacteria', u'p__Proteobacteria', u'c__Alphaproteobacteria', u'o__Rhizobiales', u'f__Hyphomicrobiaceae', u'g__Pedomicrobium', u's__']
183	2631018$$[u'k__Bacteria', u'p__Acidobacteria', u'c__Acidobacteria-6', u'o__iii1-15', u'f__', u'g__', u's__']
184	1127857$$[u'k__Bacteria', u'p__Proteobacteria', u'c__Alphaproteobacteria', u'o__Rhodospirillales', u'f__Rhodospirillaceae', u'g__', u's__']
185	811424$$[u'k__Bacteria', u'p__Verrucomicrobia', u'c__Opitutae', u'o__Opitutales', u'f__Opitutaceae', u'g__', u's__']
186	3936243$$[u'k__Bacteria', u'p__Actinobacteria', u'c__Actinobacteria', u'o__Actinomycetales', u'f__Nocardioidaceae', u'g__', u's__']
187	937999$$[u'k__Bacteria', u'p__Verrucomicrobia', u'c__Verrucomicrobiae', u'o__Verrucomicrobiales', u'f__Verrucomicrobiaceae', u'g__', u's__']
188	984175$$[u'k__Bacteria', u'p__Actinobacteria', u'c__Acidimicrobiia', u'o__Acidimicrobiales']
189	2966696$$[u'k__Bacteria', u'p__Proteobacteria', u'c__Alphaproteobacteria', u'o__Rhodospirillales', u'f__Rhodospirillaceae', u'g__', u's__']
190	252274$$[u'k__Bacteria', u'p__Proteobacteria', u'c__Alphaproteobacteria', u'o__Rhizobiales', u'f__', u'g__', u's__']
191	949062$$[u'k__Bacteria', u'p__Proteobacteria', u'c__Alphaproteobacteria', u'o__Sphingomonadales', u'f__Sphingomonadaceae', u'g__Kaistobacter', u's__']
192	138840$$[u'k__Bacteria', u'p__Proteobacteria', u'c__Gammaproteobacteria', u'o__Pseudomonadales', u'f__Pseudomonadaceae', u'g__Pseudomonas']
193	4325926$$[u'k__Bacteria', u'p__Proteobacteria', u'c__Alphaproteobacteria', u'o__Rhodospirillales', u'f__Rhodospirillaceae', u'g__', u's__']
194	971270$$[u'k__Bacteria', u'p__Actinobacteria', u'c__Actinobacteria', u'o__Actinomycetales', u'f__Nocardioidaceae', u'g__', u's__']
195	4438018$$[u'k__Bacteria', u'p__Proteobacteria', u'c__Alphaproteobacteria', u'o__Rhodospirillales', u'f__Rhodospirillaceae', u'g__', u's__']
196	289530$$[u'k__Bacteria', u'p__Chloroflexi', u'c__Chloroflexi', u'o__[Roseiflexales]', u'f__[Kouleothrixaceae]', u'g__', u's__']
197	250291$$[u'k__Bacteria', u'p__Planctomycetes', u'c__Phycisphaerae', u'o__WD2101', u'f__', u'g__', u's__']
198	4278428$$[u'k__Bacteria', u'p__Proteobacteria', u'c__Alphaproteobacteria', u'o__Sphingomonadales', u'f__Erythrobacteraceae']
199	859313$$[u'k__Bacteria', u'p__Actinobacteria', u'c__Acidimicrobiia', u'o__Acidimicrobiales', u'f__C111', u'g__', u's__']
200	4372422$$[u'k__Bacteria', u'p__Chlorobi', u'c__', u'o__', u'f__', u'g__', u's__']
201	4459446$$[u'k__Bacteria', u'p__Actinobacteria', u'c__Actinobacteria', u'o__Actinomycetales', u'f__Mycobacteriaceae', u'g__Mycobacterium', u's__']
202	3992505$$[u'k__Bacteria', u'p__Proteobacteria', u'c__Deltaproteobacteria', u'o__Myxococcales', u'f__Nannocystaceae', u'g__Plesiocystis', u's__']
203	4352292$$[u'k__Bacteria', u'p__Planctomycetes', u'c__Phycisphaerae', u'o__WD2101', u'f__', u'g__', u's__']
204	2792167$$[u'k__Bacteria', u'p__Bacteroidetes', u'c__[Saprospirae]', u'o__[Saprospirales]', u'f__Chitinophagaceae', u'g__Sediminibacterium', u's__']
205	1145138$$[u'k__Bacteria', u'p__Proteobacteria', u'c__Betaproteobacteria', u'o__Burkholderiales', u'f__Comamonadaceae', u'g__Hydrogenophaga', u's__']
206	798634$$[u'k__Bacteria', u'p__Proteobacteria', u'c__Betaproteobacteria', u'o__Burkholderiales', u'f__Comamonadaceae']
207	142010$$[u'k__Bacteria', u'p__Verrucomicrobia', u'c__Opitutae', u'o__Opitutales', u'f__Opitutaceae', u'g__Opitutus', u's__']
208	216805$$[u'k__Bacteria', u'p__Proteobacteria', u'c__Alphaproteobacteria', u'o__Rhizobiales', u'f__Bradyrhizobiaceae']
209	1037355$$[u'k__Bacteria', u'p__Actinobacteria', u'c__Actinobacteria', u'o__Actinomycetales', u'f__Streptomycetaceae']
210	1134462$$[u'k__Bacteria', u'p__Actinobacteria', u'c__Actinobacteria', u'o__Actinomycetales', u'f__Streptomycetaceae']
211	584900$$[u'k__Bacteria', u'p__Proteobacteria', u'c__Alphaproteobacteria', u'o__Sphingomonadales', u'f__Erythrobacteraceae', u'g__', u's__']
212	4095276$$[u'k__Bacteria', u'p__Proteobacteria', u'c__Alphaproteobacteria', u'o__Rhizobiales', u'f__Hyphomicrobiaceae', u'g__Devosia', u's__']
213	4366206$$[u'k__Bacteria', u'p__Proteobacteria', u'c__Alphaproteobacteria', u'o__Rhizobiales']
214	57759$$[u'k__Bacteria', u'p__Bacteroidetes', u'c__Flavobacteriia', u'o__Flavobacteriales', u'f__Flavobacteriaceae', u'g__Flavobacterium', u's__columnare']
215	357743$$[u'k__Bacteria', u'p__Acidobacteria', u'c__Acidobacteria-6', u'o__CCU21', u'f__', u'g__', u's__']
216	141219$$[u'k__Bacteria', u'p__Spirochaetes', u'c__Spirochaetes', u'o__Spirochaetales', u'f__Spirochaetaceae', u'g__Spirochaeta', u's__aurantia']
217	257891$$[u'k__Bacteria', u'p__Proteobacteria', u'c__Alphaproteobacteria', u'o__Ellin329', u'f__', u'g__', u's__']
218	706728$$[u'k__Bacteria', u'p__Proteobacteria', u'c__Alphaproteobacteria', u'o__Sphingomonadales', u'f__Sphingomonadaceae', u'g__Kaistobacter', u's__']
219	888623$$[u'k__Bacteria', u'p__Bacteroidetes', u'c__[Saprospirae]', u'o__[Saprospirales]', u'f__Chitinophagaceae', u'g__Flavisolibacter', u's__']
220	245273$$[u'k__Bacteria', u'p__Proteobacteria']
221	588969$$[u'k__Bacteria', u'p__Actinobacteria', u'c__Actinobacteria', u'o__Actinomycetales', u'f__Nocardioidaceae', u'g__', u's__']
222	761545$$[u'k__Bacteria', u'p__Proteobacteria', u'c__Alphaproteobacteria', u'o__Rhizobiales', u'f__Hyphomicrobiaceae', u'g__Devosia', u's__']
223	808856$$[u'k__Bacteria', u'p__Proteobacteria', u'c__Deltaproteobacteria', u'o__NB1-j', u'f__JTB38', u'g__', u's__']
224	1716466$$[u'k__Bacteria', u'p__Proteobacteria', u'c__Betaproteobacteria', u'o__Ellin6067', u'f__', u'g__', u's__']
225	1138397$$[u'k__Bacteria', u'p__Actinobacteria', u'c__Actinobacteria', u'o__Actinomycetales', u'f__Streptomycetaceae']
226	362188$$[u'k__Bacteria', u'p__Proteobacteria', u'c__Alphaproteobacteria', u'o__', u'f__', u'g__', u's__']
227	4373617$$[u'k__Bacteria', u'p__Proteobacteria', u'c__Gammaproteobacteria', u'o__Xanthomonadales', u'f__Sinobacteraceae', u'g__', u's__']
228	4401279$$[u'k__Bacteria', u'p__Proteobacteria', u'c__Deltaproteobacteria', u'o__Desulfuromonadales', u'f__Geobacteraceae', u'g__Geobacter', u's__']
229	2468881$$[u'k__Bacteria', u'p__Proteobacteria', u'c__Gammaproteobacteria', u'o__Pseudomonadales', u'f__Pseudomonadaceae', u'g__Pseudomonas']
230	213063$$[u'k__Bacteria', u'p__Proteobacteria', u'c__Alphaproteobacteria', u'o__Rhizobiales', u'f__Bradyrhizobiaceae']
231	136998$$[u'k__Bacteria', u'p__Verrucomicrobia', u'c__Opitutae', u'o__Opitutales', u'f__Opitutaceae', u'g__Opitutus', u's__']
232	4353063$$[u'k__Bacteria', u'p__Proteobacteria', u'c__Deltaproteobacteria', u'o__Myxococcales', u'f__', u'g__', u's__']
233	279358$$[u'k__Bacteria', u'p__Proteobacteria', u'c__Alphaproteobacteria', u'o__Caulobacterales', u'f__Caulobacteraceae', u'g__Phenylobacterium', u's__']
234	206405$$[u'k__Bacteria', u'p__Proteobacteria', u'c__Betaproteobacteria', u'o__IS-44', u'f__', u'g__', u's__']
235	821705$$[u'k__Bacteria', u'p__Proteobacteria', u'c__Alphaproteobacteria', u'o__Caulobacterales', u'f__Caulobacteraceae', u'g__', u's__']
236	4366008$$[u'k__Bacteria', u'p__Fibrobacteres', u'c__Fibrobacteria', u'o__258ds10', u'f__', u'g__', u's__']
237	1129425$$[u'k__Bacteria', u'p__Actinobacteria', u'c__Thermoleophilia', u'o__Solirubrobacterales', u'f__Solirubrobacteraceae', u'g__Solirubrobacter', u's__']
238	804397$$[u'k__Bacteria', u'p__Proteobacteria', u'c__Alphaproteobacteria', u'o__Rhizobiales', u'f__Hyphomicrobiaceae', u'g__Devosia', u's__']
239	1831095$$[u'k__Bacteria', u'p__Actinobacteria', u'c__Actinobacteria', u'o__Actinomycetales', u'f__Cellulomonadaceae', u'g__Cellulomonas']
240	4385959$$[u'k__Bacteria', u'p__Proteobacteria', u'c__Deltaproteobacteria', u'o__Myxococcales', u'f__', u'g__', u's__']
241	5364$$[u'k__Bacteria', u'p__Proteobacteria', u'c__Alphaproteobacteria', u'o__Rhizobiales', u'f__Rhizobiaceae', u'g__Rhizobium', u's__']
242	115150$$[u'k__Bacteria', u'p__Proteobacteria', u'c__Alphaproteobacteria', u'o__Rhizobiales', u'f__Bradyrhizobiaceae', u'g__Bradyrhizobium', u's__']
243	144720$$[u'k__Bacteria', u'p__Proteobacteria', u'c__Alphaproteobacteria', u'o__Rhizobiales']
244	281360$$[u'k__Bacteria', u'p__Proteobacteria', u'c__Alphaproteobacteria', u'o__Rhodospirillales', u'f__Rhodospirillaceae', u'g__', u's__']
245	239185$$[u'k__Bacteria', u'p__Bacteroidetes', u'c__Sphingobacteriia', u'o__Sphingobacteriales', u'f__', u'g__', u's__']
246	803166$$[u'k__Bacteria', u'p__Proteobacteria', u'c__Deltaproteobacteria', u'o__Myxococcales']
247	3490231$$[u'k__Bacteria', u'p__Acidobacteria', u'c__Solibacteres', u'o__Solibacterales', u'f__', u'g__', u's__']
248	821185$$[u'k__Bacteria', u'p__Actinobacteria', u'c__Actinobacteria', u'o__Actinomycetales', u'f__Streptomycetaceae']
249	1129998$$[u'k__Bacteria', u'p__Proteobacteria', u'c__Alphaproteobacteria', u'o__Rhizobiales', u'f__Hyphomicrobiaceae', u'g__Hyphomicrobium']
250	2679706$$[u'k__Bacteria', u'p__Proteobacteria', u'c__Alphaproteobacteria', u'o__Ellin329', u'f__', u'g__', u's__']
251	1123592$$[u'k__Bacteria', u'p__Proteobacteria', u'c__Alphaproteobacteria', u'o__Rhizobiales', u'f__Phyllobacteriaceae', u'g__Aminobacter', u's__']
252	510547$$[u'k__Bacteria', u'p__Actinobacteria', u'c__Acidimicrobiia', u'o__Acidimicrobiales', u'f__', u'g__', u's__']
253	217917$$[u'k__Bacteria', u'p__Chloroflexi', u'c__Chloroflexi', u'o__[Roseiflexales]', u'f__[Kouleothrixaceae]', u'g__', u's__']
254	4413439$$[u'k__Bacteria', u'p__Proteobacteria', u'c__Betaproteobacteria', u'o__Burkholderiales', u'f__Comamonadaceae', u'g__Methylibium']
255	4333969$$[u'k__Bacteria', u'p__Proteobacteria', u'c__Betaproteobacteria', u'o__Rhodocyclales', u'f__Rhodocyclaceae']
256	1091625$$[u'k__Bacteria', u'p__Verrucomicrobia', u'c__Opitutae', u'o__Opitutales', u'f__Opitutaceae', u'g__Opitutus', u's__']
257	1054055$$[u'k__Bacteria', u'p__Verrucomicrobia', u'c__[Pedosphaerae]', u'o__[Pedosphaerales]', u'f__auto67_4W', u'g__', u's__']
258	315196$$[u'k__Bacteria', u'p__Proteobacteria', u'c__Alphaproteobacteria', u'o__Rhizobiales', u'f__Hyphomicrobiaceae', u'g__Devosia', u's__']
259	221568$$[u'k__Bacteria', u'p__Verrucomicrobia', u'c__[Pedosphaerae]', u'o__[Pedosphaerales]']
260	792078$$[u'k__Bacteria', u'p__Proteobacteria', u'c__Alphaproteobacteria', u'o__Rhizobiales', u'f__', u'g__', u's__']
261	262768$$[u'k__Bacteria', u'p__Proteobacteria', u'c__Alphaproteobacteria', u'o__Rhodospirillales', u'f__Rhodospirillaceae', u'g__', u's__']
262	810700$$[u'k__Bacteria', u'p__Proteobacteria', u'c__Alphaproteobacteria', u'o__Rhodospirillales', u'f__Rhodospirillaceae']
263	570112$$[u'k__Bacteria', u'p__Proteobacteria', u'c__Alphaproteobacteria', u'o__Rhizobiales', u'f__Phyllobacteriaceae', u'g__Mesorhizobium', u's__']
264	815884$$[u'k__Bacteria', u'p__Proteobacteria', u'c__Gammaproteobacteria', u'o__Xanthomonadales', u'f__Xanthomonadaceae', u'g__Arenimonas', u's__oryziterrae']
265	102924$$[u'k__Bacteria', u'p__Proteobacteria', u'c__Alphaproteobacteria', u'o__Rhizobiales', u'f__Phyllobacteriaceae', u'g__Mesorhizobium', u's__']
266	244657$$[u'k__Bacteria', u'p__Proteobacteria', u'c__Alphaproteobacteria', u'o__Rhizobiales', u'f__Bradyrhizobiaceae']
267	224648$$[u'k__Bacteria', u'p__Actinobacteria', u'c__MB-A2-108', u'o__0319-7L14', u'f__', u'g__', u's__']
268	New.ReferenceOTU2720$$[u'k__Bacteria', u'p__Proteobacteria', u'c__Betaproteobacteria', u'o__Burkholderiales', u'f__Comamonadaceae', u'g__Hydrogenophaga', u's__']
269	New.ReferenceOTU2358$$[u'k__Bacteria', u'p__Planctomycetes', u'c__', u'o__', u'f__', u'g__', u's__']
270	New.ReferenceOTU1889$$[u'k__Bacteria', u'p__Verrucomicrobia', u'c__Verrucomicrobiae', u'o__Verrucomicrobiales', u'f__Verrucomicrobiaceae', u'g__', u's__']
271	New.ReferenceOTU1883$$[u'k__Bacteria', u'p__Actinobacteria', u'c__Actinobacteria', u'o__Actinomycetales', u'f__Micromonosporaceae', u'g__Pilimelia', u's__']
272	New.ReferenceOTU1400$$[u'k__Bacteria', u'p__Gemmatimonadetes', u'c__Gemmatimonadetes', u'o__', u'f__', u'g__', u's__']
273	New.ReferenceOTU1317$$[u'k__Bacteria', u'p__Fibrobacteres', u'c__Fibrobacteria', u'o__258ds10', u'f__', u'g__', u's__']
274	New.ReferenceOTU451$$[u'k__Bacteria', u'p__Proteobacteria', u'c__Alphaproteobacteria', u'o__Rhodospirillales', u'f__Rhodospirillaceae', u'g__', u's__']
275	New.ReferenceOTU2218$$[u'k__Bacteria', u'p__Fibrobacteres', u'c__Fibrobacteria', u'o__258ds10', u'f__', u'g__', u's__']
276	New.ReferenceOTU598$$[u'k__Bacteria', u'p__Proteobacteria', u'c__Alphaproteobacteria', u'o__Rhizobiales', u'f__Hyphomicrobiaceae', u'g__Devosia', u's__']
277	New.ReferenceOTU2696$$[u'k__Bacteria', u'p__Proteobacteria', u'c__Alphaproteobacteria', u'o__Sphingomonadales', u'f__Sphingomonadaceae']
278	New.ReferenceOTU924$$[u'k__Bacteria', u'p__Acidobacteria', u'c__Solibacteres', u'o__Solibacterales', u'f__', u'g__', u's__']
279	New.ReferenceOTU2321$$[u'k__Bacteria', u'p__Proteobacteria', u'c__Alphaproteobacteria', u'o__Sphingomonadales', u'f__Sphingomonadaceae', u'g__Sphingomonas', u's__wittichii']
280	New.ReferenceOTU2322$$[u'k__Bacteria', u'p__Bacteroidetes', u'c__Flavobacteriia', u'o__Flavobacteriales', u'f__Flavobacteriaceae', u'g__Flavobacterium', u's__columnare']
281	New.ReferenceOTU2034$$[u'k__Bacteria', u'p__Actinobacteria', u'c__Actinobacteria', u'o__Actinomycetales']
282	New.ReferenceOTU1079$$[u'k__Bacteria', u'p__Proteobacteria', u'c__Alphaproteobacteria', u'o__Rhizobiales', u'f__Bradyrhizobiaceae']
283	New.ReferenceOTU1078$$[u'k__Bacteria', u'p__Actinobacteria', u'c__Actinobacteria', u'o__Actinomycetales', u'f__Mycobacteriaceae', u'g__Mycobacterium', u's__']
284	New.ReferenceOTU1070$$[u'k__Bacteria', u'p__Actinobacteria', u'c__Actinobacteria', u'o__Actinomycetales', u'f__Mycobacteriaceae', u'g__Mycobacterium']
285	New.ReferenceOTU1679$$[u'k__Bacteria', u'p__Acidobacteria', u'c__Sva0725', u'o__Sva0725', u'f__', u'g__', u's__']
286	New.ReferenceOTU591$$[u'k__Bacteria', u'p__Chloroflexi', u'c__Ellin6529', u'o__', u'f__', u'g__', u's__']
287	New.ReferenceOTU2514$$[u'k__Bacteria', u'p__Proteobacteria', u'c__Alphaproteobacteria', u'o__Sphingomonadales', u'f__Sphingomonadaceae', u'g__Sphingomonas', u's__wittichii']
288	New.ReferenceOTU2518$$[u'k__Bacteria', u'p__Acidobacteria', u'c__Acidobacteria-6', u'o__iii1-15', u'f__', u'g__', u's__']
289	New.ReferenceOTU442$$[u'k__Bacteria', u'p__Proteobacteria', u'c__Deltaproteobacteria', u'o__Desulfuromonadales', u'f__Geobacteraceae', u'g__Geobacter', u's__']
290	New.ReferenceOTU446$$[u'k__Bacteria', u'p__Acidobacteria', u'c__[Chloracidobacteria]', u'o__RB41', u'f__Ellin6075', u'g__', u's__']
291	New.ReferenceOTU283$$[u'k__Bacteria', u'p__Actinobacteria', u'c__Acidimicrobiia', u'o__Acidimicrobiales', u'f__C111', u'g__', u's__']
292	New.ReferenceOTU2209$$[u'k__Bacteria', u'p__Chloroflexi', u'c__Ellin6529', u'o__', u'f__', u'g__', u's__']
293	New.ReferenceOTU2202$$[u'k__Bacteria', u'p__Proteobacteria', u'c__Alphaproteobacteria', u'o__Rhodospirillales', u'f__Rhodospirillaceae', u'g__', u's__']
294	New.ReferenceOTU844$$[u'k__Bacteria', u'p__Proteobacteria', u'c__Gammaproteobacteria', u'o__Xanthomonadales', u'f__Sinobacteraceae', u'g__', u's__']
295	New.ReferenceOTU845$$[u'k__Bacteria', u'p__Proteobacteria', u'c__Alphaproteobacteria', u'o__Rhizobiales', u'f__Hyphomicrobiaceae', u'g__Rhodoplanes', u's__']
296	New.ReferenceOTU2681$$[u'k__Bacteria', u'p__Proteobacteria', u'c__Alphaproteobacteria', u'o__Sphingomonadales', u'f__Sphingomonadaceae', u'g__Sphingomonas']
297	New.ReferenceOTU939$$[u'k__Bacteria', u'p__Proteobacteria', u'c__Betaproteobacteria', u'o__Burkholderiales', u'f__Comamonadaceae', u'g__Methylibium', u's__']
298	New.ReferenceOTU2336$$[u'k__Bacteria', u'p__Actinobacteria', u'c__MB-A2-108', u'o__0319-7L14', u'f__', u'g__', u's__']
299	New.ReferenceOTU2023$$[u'k__Bacteria', u'p__Proteobacteria', u'c__Alphaproteobacteria', u'o__Rhizobiales']
300	New.ReferenceOTU1934$$[u'k__Bacteria', u'p__Acidobacteria', u'c__Solibacteres', u'o__Solibacterales', u'f__Solibacteraceae', u'g__Candidatus Solibacter', u's__']
301	New.ReferenceOTU1935$$[u'k__Bacteria', u'p__Proteobacteria', u'c__Betaproteobacteria', u'o__Burkholderiales', u'f__Comamonadaceae', u'g__Methylibium', u's__']
302	New.ReferenceOTU1799$$[u'k__Bacteria', u'p__Proteobacteria', u'c__Betaproteobacteria', u'o__Burkholderiales', u'f__Comamonadaceae']
303	New.ReferenceOTU613$$[u'k__Bacteria', u'p__Proteobacteria', u'c__Alphaproteobacteria', u'o__Rhodospirillales', u'f__Rhodospirillaceae', u'g__', u's__']
304	New.ReferenceOTU1421$$[u'k__Bacteria', u'p__Planctomycetes', u'c__Phycisphaerae', u'o__WD2101', u'f__', u'g__', u's__']
305	New.ReferenceOTU728$$[u'k__Bacteria', u'p__Chloroflexi', u'c__Ellin6529', u'o__', u'f__', u'g__', u's__']
306	New.ReferenceOTU723$$[u'k__Bacteria', u'p__Proteobacteria', u'c__Alphaproteobacteria', u'o__Rhizobiales', u'f__Bradyrhizobiaceae', u'g__Balneimonas', u's__']
307	New.ReferenceOTU1333$$[u'k__Bacteria', u'p__Verrucomicrobia', u'c__Opitutae', u'o__Opitutales', u'f__Opitutaceae', u'g__Opitutus', u's__']
308	New.ReferenceOTU434$$[u'k__Bacteria', u'p__Fibrobacteres', u'c__Fibrobacteria', u'o__258ds10', u'f__', u'g__', u's__']
309	New.ReferenceOTU2231$$[u'k__Bacteria', u'p__Proteobacteria', u'c__Betaproteobacteria', u'o__Ellin6067', u'f__', u'g__', u's__']
310	New.ReferenceOTU430$$[u'k__Bacteria', u'p__Acidobacteria', u'c__Solibacteres', u'o__Solibacterales', u'f__', u'g__', u's__']
311	New.ReferenceOTU946$$[u'k__Bacteria', u'p__Chlamydiae', u'c__Chlamydiia', u'o__Chlamydiales', u'f__', u'g__', u's__']
312	New.ReferenceOTU2622$$[u'k__Bacteria', u'p__Proteobacteria', u'c__Betaproteobacteria', u'o__MND1', u'f__', u'g__', u's__']
313	New.ReferenceOTU1924$$[u'k__Bacteria', u'p__Proteobacteria', u'c__Alphaproteobacteria', u'o__Rhodospirillales', u'f__Rhodospirillaceae', u'g__', u's__']
314	New.ReferenceOTU540$$[u'k__Bacteria', u'p__Proteobacteria', u'c__Alphaproteobacteria', u'o__Rhodospirillales', u'f__Rhodospirillaceae', u'g__', u's__']
315	New.ReferenceOTU1259$$[u'k__Bacteria', u'p__Bacteroidetes', u'c__Cytophagia', u'o__Cytophagales', u'f__Cytophagaceae', u'g__', u's__']
316	New.ReferenceOTU1436$$[u'k__Bacteria', u'p__Proteobacteria', u'c__Alphaproteobacteria', u'o__Rhizobiales', u'f__Phyllobacteriaceae', u'g__Mesorhizobium', u's__']
317	New.ReferenceOTU2307$$[u'k__Bacteria', u'p__Verrucomicrobia', u'c__Verrucomicrobiae', u'o__Verrucomicrobiales', u'f__Verrucomicrobiaceae', u'g__Luteolibacter', u's__']
318	New.ReferenceOTU2535$$[u'k__Bacteria', u'p__Actinobacteria', u'c__Actinobacteria', u'o__Actinomycetales', u'f__Microbacteriaceae', u'g__Salinibacterium', u's__']
319	New.ReferenceOTU424$$[u'k__Bacteria', u'p__Proteobacteria', u'c__Alphaproteobacteria', u'o__Rhodospirillales', u'f__Rhodospirillaceae', u'g__', u's__']
320	New.ReferenceOTU421$$[u'k__Bacteria', u'p__Proteobacteria', u'c__Betaproteobacteria', u'o__Burkholderiales', u'f__Comamonadaceae']
321	New.ReferenceOTU130$$[u'k__Bacteria', u'p__Acidobacteria', u'c__Acidobacteria-6', u'o__iii1-15', u'f__', u'g__', u's__']
322	New.ReferenceOTU131$$[u'k__Bacteria', u'p__Proteobacteria', u'c__Gammaproteobacteria', u'o__Xanthomonadales', u'f__Sinobacteraceae', u'g__Steroidobacter', u's__']
323	New.ReferenceOTU550$$[u'k__Bacteria', u'p__Proteobacteria', u'c__Gammaproteobacteria', u'o__Xanthomonadales']
324	New.ReferenceOTU553$$[u'k__Bacteria', u'p__Proteobacteria', u'c__Alphaproteobacteria', u'o__Ellin329', u'f__', u'g__', u's__']
325	New.ReferenceOTU2313$$[u'k__Bacteria', u'p__Actinobacteria', u'c__Acidimicrobiia', u'o__Acidimicrobiales', u'f__', u'g__', u's__']
326	New.ReferenceOTU2007$$[u'k__Bacteria', u'p__Proteobacteria', u'c__Alphaproteobacteria', u'o__Caulobacterales', u'f__Caulobacteraceae', u'g__', u's__']
327	New.ReferenceOTU639$$[u'k__Bacteria', u'p__Proteobacteria', u'c__Alphaproteobacteria', u'o__Sphingomonadales', u'f__Erythrobacteraceae']
328	New.ReferenceOTU1138$$[u'k__Bacteria', u'p__Actinobacteria', u'c__Acidimicrobiia', u'o__Acidimicrobiales', u'f__', u'g__', u's__']
329	New.ReferenceOTU705$$[u'k__Bacteria', u'p__Actinobacteria', u'c__Actinobacteria', u'o__Actinomycetales', u'f__Micrococcaceae']
330	New.ReferenceOTU1356$$[u'k__Bacteria', u'p__Proteobacteria', u'c__Alphaproteobacteria', u'o__Sphingomonadales', u'f__Sphingomonadaceae']
331	New.ReferenceOTU411$$[u'k__Bacteria', u'p__Proteobacteria', u'c__Betaproteobacteria', u'o__Burkholderiales', u'f__Comamonadaceae', u'g__Rubrivivax', u's__']
332	New.ReferenceOTU412$$[u'k__Bacteria', u'p__Acidobacteria', u'c__Acidobacteria-5', u'o__', u'f__', u'g__', u's__']
333	New.ReferenceOTU414$$[u'k__Bacteria', u'p__Proteobacteria', u'c__Alphaproteobacteria', u'o__Rhizobiales', u'f__Phyllobacteriaceae', u'g__Mesorhizobium', u's__']
334	New.ReferenceOTU2250$$[u'k__Bacteria', u'p__Bacteroidetes', u'c__Cytophagia', u'o__Cytophagales', u'f__Cytophagaceae', u'g__', u's__']
335	New.ReferenceOTU564$$[u'k__Bacteria', u'p__Proteobacteria', u'c__Betaproteobacteria', u'o__Burkholderiales', u'f__Comamonadaceae']
336	New.ReferenceOTU563$$[u'k__Bacteria', u'p__Proteobacteria', u'c__Alphaproteobacteria', u'o__Caulobacterales', u'f__Caulobacteraceae']
337	New.ReferenceOTU2672$$[u'k__Bacteria', u'p__Bacteroidetes', u'c__[Saprospirae]', u'o__[Saprospirales]', u'f__Chitinophagaceae', u'g__', u's__']
338	New.ReferenceOTU2674$$[u'k__Bacteria', u'p__Proteobacteria', u'c__Alphaproteobacteria', u'o__Rhizobiales', u'f__Hyphomicrobiaceae', u'g__Rhodoplanes', u's__']
339	New.ReferenceOTU966$$[u'k__Bacteria', u'p__Chloroflexi', u'c__Ellin6529', u'o__', u'f__', u'g__', u's__']
340	New.ReferenceOTU969$$[u'k__Bacteria', u'p__Verrucomicrobia', u'c__Opitutae', u'o__Opitutales', u'f__Opitutaceae', u'g__', u's__']
341	New.ReferenceOTU2077$$[u'k__Bacteria', u'p__Chloroflexi', u'c__Chloroflexi', u'o__[Roseiflexales]', u'f__', u'g__', u's__']
342	New.ReferenceOTU628$$[u'k__Bacteria', u'p__Proteobacteria', u'c__Betaproteobacteria', u'o__Rhodocyclales', u'f__Rhodocyclaceae', u'g__Dechloromonas', u's__']
343	New.ReferenceOTU1235$$[u'k__Bacteria', u'p__Chloroflexi', u'c__Anaerolineae', u'o__SBR1031', u'f__A4b', u'g__', u's__']
344	New.ReferenceOTU1234$$[u'k__Bacteria', u'p__Bacteroidetes', u'c__[Saprospirae]', u'o__[Saprospirales]', u'f__Chitinophagaceae']
345	New.ReferenceOTU1699$$[u'k__Bacteria', u'p__Verrucomicrobia', u'c__[Spartobacteria]', u'o__[Chthoniobacterales]', u'f__[Chthoniobacteraceae]', u'g__DA101', u's__']
346	New.ReferenceOTU714$$[u'k__Bacteria', u'p__Verrucomicrobia', u'c__Opitutae', u'o__Opitutales', u'f__Opitutaceae', u'g__Opitutus', u's__']
347	New.ReferenceOTU1340$$[u'k__Bacteria', u'p__Proteobacteria', u'c__Alphaproteobacteria', u'o__Rhizobiales', u'f__Hyphomicrobiaceae', u'g__Rhodoplanes', u's__']
348	New.ReferenceOTU398$$[u'k__Bacteria', u'p__Proteobacteria', u'c__Alphaproteobacteria', u'o__Rhizobiales', u'f__Hyphomicrobiaceae', u'g__Rhodoplanes', u's__']
349	New.ReferenceOTU2489$$[u'k__Bacteria', u'p__Proteobacteria', u'c__Alphaproteobacteria', u'o__Rhizobiales', u'f__Hyphomicrobiaceae', u'g__Pedomicrobium', u's__']
350	New.ReferenceOTU573$$[u'k__Bacteria', u'p__Actinobacteria', u'c__Acidimicrobiia', u'o__Acidimicrobiales', u'f__EB1017', u'g__', u's__']
351	New.ReferenceOTU2668$$[u'k__Bacteria', u'p__Chloroflexi', u'c__Ellin6529', u'o__', u'f__', u'g__', u's__']
352	New.ReferenceOTU889$$[u'k__Bacteria', u'p__Proteobacteria', u'c__Alphaproteobacteria', u'o__Rhizobiales', u'f__Hyphomicrobiaceae', u'g__Rhodoplanes', u's__']
353	New.ReferenceOTU305$$[u'k__Bacteria', u'p__Planctomycetes', u'c__Phycisphaerae', u'o__WD2101', u'f__', u'g__', u's__']
354	New.ReferenceOTU2068$$[u'k__Bacteria', u'p__Proteobacteria', u'c__Deltaproteobacteria', u'o__Myxococcales', u'f__Polyangiaceae', u'g__Sorangium', u's__cellulosum']
355	New.ReferenceOTU2067$$[u'k__Bacteria', u'p__Proteobacteria', u'c__Betaproteobacteria', u'o__Burkholderiales', u'f__Comamonadaceae']
356	New.ReferenceOTU2113$$[u'k__Bacteria', u'p__Chlamydiae', u'c__Chlamydiia', u'o__Chlamydiales', u'f__', u'g__', u's__']
357	New.ReferenceOTU16$$[u'k__Bacteria', u'p__Actinobacteria', u'c__Actinobacteria', u'o__Actinomycetales', u'f__Intrasporangiaceae']
358	New.ReferenceOTU14$$[u'k__Bacteria', u'p__Chloroflexi', u'c__Chloroflexi', u'o__[Roseiflexales]', u'f__[Kouleothrixaceae]', u'g__', u's__']
359	New.ReferenceOTU1759$$[u'k__Bacteria', u'p__Proteobacteria', u'c__Alphaproteobacteria', u'o__Rhodospirillales', u'f__Rhodospirillaceae', u'g__', u's__']
360	New.ReferenceOTU1205$$[u'k__Bacteria', u'p__Proteobacteria', u'c__Alphaproteobacteria', u'o__Rhizobiales', u'f__Rhizobiaceae', u'g__Agrobacterium']
361	New.ReferenceOTU1200$$[u'k__Bacteria', u'p__Actinobacteria', u'c__Acidimicrobiia', u'o__Acidimicrobiales', u'f__C111', u'g__', u's__']
362	New.ReferenceOTU764$$[u'k__Bacteria', u'p__Proteobacteria', u'c__Alphaproteobacteria', u'o__', u'f__', u'g__', u's__']
363	New.ReferenceOTU1116$$[u'k__Bacteria', u'p__Proteobacteria', u'c__Alphaproteobacteria', u'o__Rhodospirillales', u'f__Rhodospirillaceae', u'g__', u's__']
364	New.ReferenceOTU1115$$[u'k__Bacteria', u'p__Gemmatimonadetes', u'c__Gemm-1', u'o__', u'f__', u'g__', u's__']
365	New.ReferenceOTU402$$[u'k__Bacteria', u'p__Gemmatimonadetes', u'c__Gemm-1', u'o__', u'f__', u'g__', u's__']
366	New.ReferenceOTU1573$$[u'k__Bacteria', u'p__Planctomycetes', u'c__Phycisphaerae', u'o__Phycisphaerales', u'f__', u'g__', u's__']
367	New.ReferenceOTU184$$[u'k__Bacteria', u'p__Bacteroidetes', u'c__Cytophagia', u'o__Cytophagales', u'f__Cytophagaceae', u'g__', u's__']
368	New.ReferenceOTU211$$[u'k__Bacteria', u'p__Acidobacteria', u'c__Solibacteres', u'o__Solibacterales', u'f__[Bryobacteraceae]', u'g__', u's__']
369	New.ReferenceOTU218$$[u'k__Bacteria', u'p__Actinobacteria', u'c__Actinobacteria', u'o__Actinomycetales', u'f__Nakamurellaceae', u'g__', u's__']
370	New.ReferenceOTU2588$$[u'k__Bacteria', u'p__Bacteroidetes', u'c__Cytophagia', u'o__Cytophagales', u'f__Cytophagaceae', u'g__', u's__']
371	New.ReferenceOTU2581$$[u'k__Bacteria', u'p__Actinobacteria', u'c__Actinobacteria', u'o__Actinomycetales', u'f__Geodermatophilaceae', u'g__', u's__']
372	New.ReferenceOTU2051$$[u'k__Bacteria', u'p__Proteobacteria', u'c__Alphaproteobacteria', u'o__Sphingomonadales', u'f__', u'g__', u's__']
373	New.ReferenceOTU0$$[u'k__Bacteria', u'p__Actinobacteria', u'c__Actinobacteria', u'o__Actinomycetales', u'f__Nocardioidaceae', u'g__', u's__']
374	New.ReferenceOTU2296$$[u'k__Bacteria', u'p__Fibrobacteres', u'c__Fibrobacteria', u'o__258ds10', u'f__', u'g__', u's__']
375	New.ReferenceOTU2293$$[u'k__Bacteria', u'p__Proteobacteria', u'c__Alphaproteobacteria', u'o__Rhodospirillales', u'f__Rhodospirillaceae']
376	New.ReferenceOTU2120$$[u'k__Bacteria', u'p__Proteobacteria', u'c__Deltaproteobacteria', u'o__Myxococcales', u'f__OM27', u'g__', u's__']
377	New.ReferenceOTU1624$$[u'k__Bacteria', u'p__Proteobacteria', u'c__Alphaproteobacteria', u'o__Rhodospirillales', u'f__Acetobacteraceae']
378	New.ReferenceOTU1969$$[u'k__Bacteria', u'p__Actinobacteria', u'c__Actinobacteria', u'o__Actinomycetales', u'f__Actinosynnemataceae']
379	New.ReferenceOTU1962$$[u'k__Bacteria', u'p__Proteobacteria', u'c__Alphaproteobacteria', u'o__Rhizobiales', u'f__', u'g__', u's__']
380	New.ReferenceOTU1967$$[u'k__Bacteria', u'p__OD1', u'c__ZB2', u'o__', u'f__', u'g__', u's__']
381	New.ReferenceOTU1966$$[u'k__Bacteria', u'p__Proteobacteria', u'c__Betaproteobacteria', u'o__Burkholderiales', u'f__Comamonadaceae', u'g__Methylibium']
382	New.ReferenceOTU1817$$[u'k__Bacteria', u'p__Planctomycetes', u'c__Phycisphaerae', u'o__WD2101', u'f__', u'g__', u's__']
383	New.ReferenceOTU1816$$[u'k__Bacteria', u'p__Proteobacteria', u'c__Gammaproteobacteria', u'o__Xanthomonadales', u'f__Xanthomonadaceae']
384	New.ReferenceOTU1748$$[u'k__Bacteria', u'p__Proteobacteria', u'c__Alphaproteobacteria', u'o__Rhizobiales', u'f__Bradyrhizobiaceae']
385	New.ReferenceOTU777$$[u'k__Bacteria', u'p__Proteobacteria', u'c__Alphaproteobacteria', u'o__Sphingomonadales', u'f__Sphingomonadaceae', u'g__Kaistobacter', u's__']
386	New.ReferenceOTU1100$$[u'k__Bacteria', u'p__Proteobacteria', u'c__Alphaproteobacteria', u'o__Rhizobiales', u'f__Bradyrhizobiaceae']
387	New.ReferenceOTU1585$$[u'k__Bacteria', u'p__Actinobacteria', u'c__Acidimicrobiia', u'o__Acidimicrobiales', u'f__C111', u'g__', u's__']
388	New.ReferenceOTU1584$$[u'k__Bacteria', u'p__Proteobacteria', u'c__Alphaproteobacteria', u'o__Rhodospirillales', u'f__Rhodospirillaceae', u'g__', u's__']
389	New.ReferenceOTU2465$$[u'k__Bacteria', u'p__Acidobacteria', u'c__Acidobacteria-6', u'o__iii1-15', u'f__RB40', u'g__', u's__']
390	New.ReferenceOTU514$$[u'k__Bacteria', u'p__Proteobacteria', u'c__Deltaproteobacteria', u'o__Myxococcales', u'f__', u'g__', u's__']
391	New.ReferenceOTU998$$[u'k__Bacteria', u'p__Bacteroidetes', u'c__[Saprospirae]', u'o__[Saprospirales]', u'f__Chitinophagaceae', u'g__', u's__']
392	New.ReferenceOTU2599$$[u'k__Bacteria', u'p__Actinobacteria', u'c__Thermoleophilia', u'o__Gaiellales', u'f__Gaiellaceae', u'g__', u's__']
393	New.ReferenceOTU2598$$[u'k__Bacteria', u'p__Proteobacteria', u'c__Deltaproteobacteria', u'o__Myxococcales']
394	New.ReferenceOTU2597$$[u'k__Bacteria', u'p__Planctomycetes', u'c__Planctomycetia', u'o__Pirellulales', u'f__Pirellulaceae', u'g__', u's__']
395	New.ReferenceOTU2047$$[u'k__Bacteria', u'p__Proteobacteria', u'c__Deltaproteobacteria', u'o__Myxococcales', u'f__', u'g__', u's__']
396	New.ReferenceOTU1957$$[u'k__Bacteria', u'p__Actinobacteria', u'c__Actinobacteria', u'o__Actinomycetales', u'f__Streptomycetaceae', u'g__Streptomyces']
397	New.ReferenceOTU38$$[u'k__Bacteria', u'p__Proteobacteria', u'c__Alphaproteobacteria', u'o__Caulobacterales', u'f__Caulobacteraceae', u'g__Phenylobacterium', u's__']
398	New.ReferenceOTU34$$[u'k__Bacteria', u'p__Proteobacteria', u'c__Alphaproteobacteria', u'o__Rhizobiales', u'f__Hyphomicrobiaceae']
399	New.ReferenceOTU1824$$[u'k__Bacteria', u'p__Verrucomicrobia', u'c__[Pedosphaerae]', u'o__[Pedosphaerales]', u'f__auto67_4W', u'g__', u's__']
400	New.ReferenceOTU748$$[u'k__Bacteria', u'p__Proteobacteria', u'c__Alphaproteobacteria', u'o__Rhizobiales', u'f__Rhizobiaceae', u'g__Rhizobium', u's__']
401	New.ReferenceOTU744$$[u'k__Bacteria', u'p__Chloroflexi', u'c__TK10', u'o__AKYG885', u'f__Dolo_23', u'g__', u's__']
402	New.ReferenceOTU746$$[u'k__Bacteria', u'p__Actinobacteria', u'c__Actinobacteria', u'o__Actinomycetales', u'f__Micromonosporaceae', u'g__Dactylosporangium', u's__']
403	New.ReferenceOTU1172$$[u'k__Bacteria', u'p__Proteobacteria', u'c__Deltaproteobacteria', u'o__Myxococcales', u'f__Haliangiaceae', u'g__', u's__']
404	New.ReferenceOTU1007$$[u'k__Bacteria', u'p__Actinobacteria', u'c__Actinobacteria', u'o__Actinomycetales']
405	New.ReferenceOTU1000$$[u'k__Bacteria', u'p__Proteobacteria', u'c__Alphaproteobacteria']
406	New.ReferenceOTU1398$$[u'k__Bacteria', u'p__Actinobacteria', u'c__Acidimicrobiia', u'o__Acidimicrobiales', u'f__C111', u'g__', u's__']
407	New.ReferenceOTU1395$$[u'k__Bacteria', u'p__Actinobacteria', u'c__Actinobacteria', u'o__Actinomycetales', u'f__Nocardioidaceae', u'g__Nocardioides', u's__']
408	New.ReferenceOTU1392$$[u'k__Bacteria', u'p__Proteobacteria', u'c__Alphaproteobacteria', u'o__Rhizobiales', u'f__Hyphomicrobiaceae', u'g__Devosia', u's__']
409	New.ReferenceOTU699$$[u'k__Bacteria', u'p__Proteobacteria', u'c__Gammaproteobacteria', u'o__Xanthomonadales', u'f__Xanthomonadaceae', u'g__', u's__']
410	New.ReferenceOTU698$$[u'k__Bacteria', u'p__Proteobacteria', u'c__Deltaproteobacteria', u'o__Myxococcales']
411	New.ReferenceOTU1488$$[u'k__Bacteria', u'p__Acidobacteria', u'c__Acidobacteria-6', u'o__CCU21', u'f__', u'g__', u's__']
412	New.ReferenceOTU2459$$[u'k__Bacteria', u'p__Proteobacteria', u'c__Alphaproteobacteria', u'o__Rhizobiales', u'f__Bradyrhizobiaceae']
413	New.ReferenceOTU2453$$[u'k__Bacteria', u'p__Actinobacteria', u'c__Actinobacteria', u'o__Actinomycetales']
414	New.ReferenceOTU2451$$[u'k__Bacteria', u'p__Acidobacteria', u'c__Solibacteres', u'o__Solibacterales', u'f__Solibacteraceae', u'g__Candidatus Solibacter', u's__']
415	New.ReferenceOTU238$$[u'k__Bacteria', u'p__Actinobacteria', u'c__Actinobacteria', u'o__Actinomycetales', u'f__Micromonosporaceae']
416	New.ReferenceOTU839$$[u'k__Bacteria', u'p__Verrucomicrobia', u'c__Opitutae', u'o__Opitutales', u'f__Opitutaceae', u'g__Opitutus', u's__']
417	New.ReferenceOTU1943$$[u'k__Bacteria', u'p__Proteobacteria', u'c__Alphaproteobacteria', u'o__Rhizobiales', u'f__Hyphomicrobiaceae', u'g__Rhodoplanes', u's__']
418	New.ReferenceOTU25$$[u'k__Bacteria', u'p__Actinobacteria', u'c__Actinobacteria', u'o__Actinomycetales', u'f__Micromonosporaceae']
419	New.ReferenceOTU1548$$[u'k__Bacteria', u'p__Chloroflexi', u'c__Ellin6529', u'o__', u'f__', u'g__', u's__']
420	New.ReferenceOTU1018$$[u'k__Bacteria', u'p__Proteobacteria', u'c__Gammaproteobacteria', u'o__Xanthomonadales', u'f__Sinobacteraceae', u'g__', u's__']
421	New.ReferenceOTU1542$$[u'k__Bacteria', u'p__Proteobacteria', u'c__Betaproteobacteria', u'o__Burkholderiales', u'f__Comamonadaceae']
422	New.ReferenceOTU351$$[u'k__Bacteria', u'p__Actinobacteria', u'c__Actinobacteria', u'o__Actinomycetales', u'f__Intrasporangiaceae']
423	New.ReferenceOTU2443$$[u'k__Bacteria', u'p__Spirochaetes', u'c__Spirochaetes', u'o__Spirochaetales', u'f__Spirochaetaceae', u'g__Spirochaeta', u's__aurantia']
424	New.ReferenceOTU229$$[u'k__Bacteria', u'p__Fibrobacteres', u'c__Fibrobacteria', u'o__258ds10', u'f__', u'g__', u's__']
425	New.ReferenceOTU821$$[u'k__Bacteria', u'p__Proteobacteria', u'c__Alphaproteobacteria', u'o__Sphingomonadales', u'f__Erythrobacteraceae', u'g__', u's__']
426	New.ReferenceOTU823$$[u'k__Bacteria', u'p__Proteobacteria', u'c__Alphaproteobacteria', u'o__Rhizobiales', u'f__Rhizobiaceae']
427	New.ReferenceOTU2710$$[u'k__Bacteria', u'p__Actinobacteria', u'c__Actinobacteria', u'o__Actinomycetales', u'f__Nocardioidaceae', u'g__', u's__']
428	New.ReferenceOTU2713$$[u'k__Bacteria', u'p__Proteobacteria', u'c__Gammaproteobacteria', u'o__Xanthomonadales', u'f__Sinobacteraceae', u'g__', u's__']
429	New.ReferenceOTU1159$$[u'k__Bacteria', u'p__Chlamydiae', u'c__Chlamydiia', u'o__Chlamydiales']
430	New.ReferenceOTU1154$$[u'k__Bacteria', u'p__Proteobacteria', u'c__Gammaproteobacteria', u'o__Thiotrichales', u'f__Piscirickettsiaceae', u'g__', u's__']
431	New.ReferenceOTU1029$$[u'k__Bacteria', u'p__Nitrospirae', u'c__Nitrospira', u'o__Nitrospirales', u'f__Nitrospiraceae', u'g__Nitrospira', u's__']
432	New.ReferenceOTU1530$$[u'k__Bacteria', u'p__Proteobacteria', u'c__Alphaproteobacteria', u'o__Rhizobiales', u'f__Phyllobacteriaceae', u'g__Mesorhizobium', u's__']
433	New.ReferenceOTU1447$$[u'k__Bacteria', u'p__Proteobacteria', u'c__Betaproteobacteria', u'o__Burkholderiales', u'f__Comamonadaceae']
434	New.ReferenceOTU2438$$[u'k__Bacteria', u'p__Proteobacteria', u'c__Alphaproteobacteria', u'o__Ellin329', u'f__', u'g__', u's__']
435	New.ReferenceOTU785$$[u'k__Bacteria', u'p__Proteobacteria', u'c__Alphaproteobacteria', u'o__Rhizobiales', u'f__Rhodobiaceae', u'g__Afifella', u's__']
436	New.ReferenceOTU810$$[u'k__Bacteria', u'p__Proteobacteria', u'c__Deltaproteobacteria', u'o__Myxococcales', u'f__OM27', u'g__', u's__']
437	New.ReferenceOTU818$$[u'k__Bacteria', u'p__Proteobacteria', u'c__Alphaproteobacteria', u'o__Rhizobiales', u'f__Hyphomicrobiaceae', u'g__Rhodoplanes', u's__']
438	New.ReferenceOTU2163$$[u'k__Bacteria', u'p__Gemmatimonadetes', u'c__Gemm-1', u'o__', u'f__', u'g__', u's__']
439	New.ReferenceOTU2160$$[u'k__Bacteria', u'p__Chloroflexi', u'c__Chloroflexi', u'o__[Roseiflexales]', u'f__[Kouleothrixaceae]', u'g__', u's__']
440	New.ReferenceOTU2366$$[u'k__Bacteria', u'p__Bacteroidetes', u'c__Cytophagia', u'o__Cytophagales', u'f__Cytophagaceae', u'g__', u's__']
441	New.ReferenceOTU2361$$[u'k__Bacteria', u'p__Armatimonadetes', u'c__[Fimbriimonadia]', u'o__[Fimbriimonadales]', u'f__[Fimbriimonadaceae]', u'g__Fimbriimonas', u's__']
442	New.ReferenceOTU45$$[u'k__Bacteria', u'p__Proteobacteria', u'c__Alphaproteobacteria', u'o__Rhizobiales', u'f__Hyphomicrobiaceae', u'g__Rhodoplanes', u's__']
443	New.ReferenceOTU40$$[u'k__Bacteria', u'p__Chloroflexi', u'c__Ellin6529', u'o__', u'f__', u'g__', u's__']
444	New.ReferenceOTU42$$[u'k__Bacteria', u'p__Acidobacteria', u'c__Acidobacteria-6', u'o__CCU21', u'f__', u'g__', u's__']
445	New.ReferenceOTU1859$$[u'k__Bacteria', u'p__Actinobacteria', u'c__Actinobacteria', u'o__Actinomycetales', u'f__Cellulomonadaceae', u'g__Cellulomonas']
446	New.ReferenceOTU1701$$[u'k__Bacteria', u'p__Actinobacteria', u'c__Acidimicrobiia', u'o__Acidimicrobiales', u'f__C111', u'g__', u's__']
447	New.ReferenceOTU1032$$[u'k__Bacteria', u'p__Proteobacteria', u'c__Gammaproteobacteria', u'o__Pseudomonadales', u'f__Pseudomonadaceae', u'g__Pseudomonas', u's__umsongensis']
448	New.ReferenceOTU1039$$[u'k__Bacteria', u'p__Proteobacteria', u'c__Alphaproteobacteria', u'o__Sphingomonadales', u'f__Sphingomonadaceae']
449	New.ReferenceOTU336$$[u'k__Bacteria', u'p__Proteobacteria', u'c__Deltaproteobacteria', u'o__Myxococcales', u'f__', u'g__', u's__']
450	New.ReferenceOTU2701$$[u'k__Bacteria', u'p__Gemmatimonadetes', u'c__Gemm-1', u'o__', u'f__', u'g__', u's__']
451	New.ReferenceOTU2394$$[u'k__Bacteria', u'p__Proteobacteria', u'c__Alphaproteobacteria', u'o__Ellin329', u'f__', u'g__', u's__']
452	New.ReferenceOTU2170$$[u'k__Bacteria', u'p__Actinobacteria', u'c__Acidimicrobiia', u'o__Acidimicrobiales', u'f__EB1017', u'g__', u's__']
453	New.ReferenceOTU2176$$[u'k__Bacteria', u'p__Proteobacteria', u'c__Gammaproteobacteria', u'o__Xanthomonadales', u'f__Sinobacteraceae', u'g__', u's__']
454	New.ReferenceOTU2376$$[u'k__Bacteria', u'p__Bacteroidetes', u'c__[Saprospirae]', u'o__[Saprospirales]', u'f__Saprospiraceae', u'g__', u's__']
455	New.ReferenceOTU1990$$[u'k__Bacteria', u'p__Proteobacteria', u'c__Betaproteobacteria', u'o__MND1', u'f__', u'g__', u's__']
456	New.ReferenceOTU1997$$[u'k__Bacteria', u'p__Chloroflexi', u'c__Chloroflexi', u'o__[Roseiflexales]', u'f__', u'g__', u's__']
457	New.ReferenceOTU73$$[u'k__Bacteria', u'p__Proteobacteria', u'c__Alphaproteobacteria', u'o__Rhizobiales', u'f__Hyphomicrobiaceae', u'g__Hyphomicrobium']
458	New.ReferenceOTU1600$$[u'k__Bacteria', u'p__Proteobacteria', u'c__Betaproteobacteria', u'o__Rhodocyclales', u'f__Rhodocyclaceae', u'g__Sulfuritalea', u's__']
459	New.ReferenceOTU1601$$[u'k__Bacteria', u'p__Proteobacteria', u'c__Alphaproteobacteria', u'o__Rhizobiales', u'f__Bradyrhizobiaceae', u'g__Bradyrhizobium', u's__']
460	New.ReferenceOTU1607$$[u'k__Bacteria', u'p__Proteobacteria', u'c__Alphaproteobacteria', u'o__Rhizobiales', u'f__', u'g__', u's__']
461	New.ReferenceOTU492$$[u'k__Bacteria', u'p__Proteobacteria', u'c__Gammaproteobacteria', u'o__Xanthomonadales', u'f__Xanthomonadaceae']
462	New.ReferenceOTU495$$[u'k__Bacteria', u'p__Bacteroidetes', u'c__Cytophagia', u'o__Cytophagales', u'f__Cytophagaceae', u'g__', u's__']
463	New.ReferenceOTU1518$$[u'k__Bacteria', u'p__Acidobacteria', u'c__Solibacteres', u'o__Solibacterales', u'f__', u'g__', u's__']
464	New.ReferenceOTU303$$[u'k__Bacteria', u'p__Proteobacteria', u'c__Alphaproteobacteria', u'o__Rhizobiales']
465	New.ReferenceOTU304$$[u'k__Bacteria', u'p__Acidobacteria', u'c__Solibacteres', u'o__Solibacterales', u'f__', u'g__', u's__']
466	New.ReferenceOTU655$$[u'k__Bacteria', u'p__Fibrobacteres', u'c__Fibrobacteria', u'o__258ds10', u'f__', u'g__', u's__']
467	New.ReferenceOTU1462$$[u'k__Bacteria', u'p__Proteobacteria', u'c__Alphaproteobacteria', u'o__Rhizobiales']
468	New.ReferenceOTU2417$$[u'k__Bacteria', u'p__Gemmatimonadetes', u'c__Gemm-1', u'o__', u'f__', u'g__', u's__']
469	New.ReferenceOTU2561$$[u'k__Bacteria', u'p__Acidobacteria', u'c__Acidobacteria-6', u'o__iii1-15', u'f__RB40', u'g__', u's__']
470	New.ReferenceOTU273$$[u'k__Bacteria', u'p__Actinobacteria', u'c__Acidimicrobiia', u'o__Acidimicrobiales', u'f__EB1017', u'g__', u's__']
471	New.ReferenceOTU870$$[u'k__Bacteria', u'p__Proteobacteria', u'c__Alphaproteobacteria', u'o__Ellin329', u'f__', u'g__', u's__']
472	New.ReferenceOTU903$$[u'k__Bacteria', u'p__Proteobacteria', u'c__Betaproteobacteria', u'o__Burkholderiales', u'f__Comamonadaceae', u'g__Methylibium']
473	New.ReferenceOTU902$$[u'k__Bacteria', u'p__Proteobacteria', u'c__Betaproteobacteria', u'o__Burkholderiales', u'f__Oxalobacteraceae', u'g__Janthinobacterium', u's__']
474	New.ReferenceOTU907$$[u'k__Bacteria', u'p__Proteobacteria', u'c__Betaproteobacteria', u'o__IS-44', u'f__', u'g__', u's__']
475	New.ReferenceOTU2184$$[u'k__Bacteria', u'p__Actinobacteria', u'c__Actinobacteria', u'o__Actinomycetales']
476	New.ReferenceOTU2187$$[u'k__Bacteria', u'p__Proteobacteria', u'c__Alphaproteobacteria', u'o__Rhizobiales', u'f__', u'g__', u's__']
477	New.ReferenceOTU2181$$[u'k__Bacteria', u'p__OD1', u'c__ZB2', u'o__', u'f__', u'g__', u's__']
478	New.ReferenceOTU2349$$[u'k__Bacteria', u'p__Proteobacteria', u'c__Alphaproteobacteria', u'o__Sphingomonadales', u'f__Sphingomonadaceae']
479	New.ReferenceOTU1986$$[u'k__Bacteria', u'p__Proteobacteria', u'c__Betaproteobacteria', u'o__Burkholderiales', u'f__Comamonadaceae']
480	New.ReferenceOTU1982$$[u'k__Bacteria', u'p__Proteobacteria', u'c__Alphaproteobacteria', u'o__Rhizobiales', u'f__Hyphomicrobiaceae', u'g__Pedomicrobium', u's__']
481	New.ReferenceOTU1728$$[u'k__Bacteria', u'p__Planctomycetes', u'c__Planctomycetia', u'o__Pirellulales', u'f__Pirellulaceae']
482	New.ReferenceOTU1726$$[u'k__Bacteria', u'p__Proteobacteria', u'c__Alphaproteobacteria', u'o__Rhizobiales']
483	New.ReferenceOTU485$$[u'k__Bacteria', u'p__Acidobacteria', u'c__Acidobacteria-6', u'o__iii1-15', u'f__', u'g__', u's__']
484	New.ReferenceOTU1614$$[u'k__Bacteria', u'p__Bacteroidetes', u'c__[Saprospirae]', u'o__[Saprospirales]', u'f__Chitinophagaceae', u'g__', u's__']
485	New.ReferenceOTU319$$[u'k__Bacteria', u'p__Actinobacteria', u'c__Acidimicrobiia', u'o__Acidimicrobiales', u'f__C111', u'g__', u's__']
486	New.ReferenceOTU640$$[u'k__Bacteria', u'p__Proteobacteria', u'c__Gammaproteobacteria', u'o__Xanthomonadales', u'f__Sinobacteraceae', u'g__', u's__']
487	New.ReferenceOTU647$$[u'k__Bacteria', u'p__Actinobacteria', u'c__Actinobacteria', u'o__Actinomycetales', u'f__Streptomycetaceae']
488	New.ReferenceOTU2401$$[u'k__Bacteria', u'p__Actinobacteria', u'c__Actinobacteria', u'o__Actinomycetales']
489	New.ReferenceOTU691$$[u'k__Bacteria', u'p__Actinobacteria', u'c__Thermoleophilia', u'o__Gaiellales', u'f__Gaiellaceae', u'g__', u's__']
490	New.ReferenceOTU2576$$[u'k__Bacteria', u'p__Proteobacteria', u'c__Alphaproteobacteria', u'o__Rhizobiales']
491	New.ReferenceOTU462$$[u'k__Bacteria', u'p__Bacteroidetes', u'c__[Saprospirae]', u'o__[Saprospirales]', u'f__Chitinophagaceae']
492	New.ReferenceOTU266$$[u'k__Bacteria', u'p__Proteobacteria', u'c__Gammaproteobacteria']
493	New.ReferenceOTU260$$[u'k__Bacteria', u'p__Proteobacteria', u'c__Gammaproteobacteria', u'o__Xanthomonadales', u'f__Sinobacteraceae', u'g__', u's__']
494	New.ReferenceOTU869$$[u'k__Bacteria', u'p__Actinobacteria', u'c__Acidimicrobiia', u'o__Acidimicrobiales', u'f__EB1017', u'g__', u's__']
495	New.ReferenceOTU863$$[u'k__Bacteria', u'p__OD1', u'c__ZB2', u'o__', u'f__', u'g__', u's__']
496	New.CleanUp.ReferenceOTU9523$$[u'k__Bacteria', u'p__Acidobacteria', u'c__Solibacteres', u'o__Solibacterales', u'f__', u'g__', u's__']
497	New.CleanUp.ReferenceOTU12950$$[u'k__Bacteria', u'p__Planctomycetes', u'c__Phycisphaerae', u'o__Phycisphaerales', u'f__', u'g__', u's__']
498	New.CleanUp.ReferenceOTU15162$$[u'k__Bacteria', u'p__Verrucomicrobia', u'c__[Pedosphaerae]', u'o__[Pedosphaerales]', u'f__auto67_4W', u'g__', u's__']
499	New.CleanUp.ReferenceOTU17257$$[u'k__Bacteria', u'p__Verrucomicrobia', u'c__Opitutae', u'o__Opitutales', u'f__Opitutaceae', u'g__', u's__']
500	New.CleanUp.ReferenceOTU23698$$[u'k__Bacteria', u'p__Acidobacteria', u'c__Solibacteres', u'o__Solibacterales', u'f__Solibacteraceae', u'g__Candidatus Solibacter', u's__']
501	New.CleanUp.ReferenceOTU40768$$[u'k__Bacteria', u'p__Proteobacteria', u'c__Betaproteobacteria', u'o__Burkholderiales', u'f__Oxalobacteraceae']
502	New.CleanUp.ReferenceOTU59562$$[u'k__Bacteria', u'p__Bacteroidetes', u'c__Cytophagia', u'o__Cytophagales', u'f__Cytophagaceae', u'g__', u's__']
503	New.CleanUp.ReferenceOTU60960$$[u'k__Bacteria', u'p__Proteobacteria', u'c__Alphaproteobacteria', u'o__Sphingomonadales', u'f__Sphingomonadaceae', u'g__Kaistobacter', u's__']
504	New.CleanUp.ReferenceOTU66806$$[u'k__Bacteria', u'p__Actinobacteria', u'c__Acidimicrobiia', u'o__Acidimicrobiales', u'f__EB1017', u'g__', u's__']
505	New.CleanUp.ReferenceOTU85755$$[u'k__Bacteria', u'p__Proteobacteria', u'c__Deltaproteobacteria', u'o__Desulfuromonadales', u'f__Geobacteraceae', u'g__Geobacter', u's__']
506	New.CleanUp.ReferenceOTU88850$$[u'k__Bacteria', u'p__Proteobacteria', u'c__Alphaproteobacteria', u'o__Rhizobiales']
507	New.CleanUp.ReferenceOTU89610$$[u'k__Bacteria', u'p__Proteobacteria', u'c__Gammaproteobacteria', u'o__Xanthomonadales', u'f__Xanthomonadaceae', u'g__', u's__']
508	New.CleanUp.ReferenceOTU90116$$[u'k__Bacteria', u'p__Bacteroidetes', u'c__Cytophagia', u'o__Cytophagales', u'f__Cytophagaceae', u'g__', u's__']
509	New.CleanUp.ReferenceOTU96605$$[u'k__Bacteria', u'p__Actinobacteria', u'c__Actinobacteria', u'o__Actinomycetales', u'f__Mycobacteriaceae', u'g__Mycobacterium', u's__']
510	New.CleanUp.ReferenceOTU103534$$[u'k__Bacteria', u'p__Proteobacteria', u'c__Gammaproteobacteria', u'o__Xanthomonadales', u'f__Xanthomonadaceae']
511	New.CleanUp.ReferenceOTU111902$$[u'k__Bacteria', u'p__Proteobacteria', u'c__Alphaproteobacteria', u'o__Sphingomonadales', u'f__Sphingomonadaceae', u'g__Sphingomonas', u's__wittichii']
512	New.CleanUp.ReferenceOTU113325$$[u'k__Bacteria', u'p__Proteobacteria', u'c__Alphaproteobacteria', u'o__Rhodospirillales', u'f__Rhodospirillaceae', u'g__', u's__']
513	New.CleanUp.ReferenceOTU124547$$[u'k__Bacteria', u'p__Bacteroidetes', u'c__[Saprospirae]', u'o__[Saprospirales]', u'f__Chitinophagaceae', u'g__Flavisolibacter', u's__']
514	New.CleanUp.ReferenceOTU132036$$[u'k__Bacteria', u'p__Bacteroidetes', u'c__Cytophagia', u'o__Cytophagales', u'f__Cytophagaceae', u'g__', u's__']
515	New.CleanUp.ReferenceOTU136940$$[u'k__Bacteria', u'p__Proteobacteria', u'c__Alphaproteobacteria', u'o__Rhizobiales', u'f__', u'g__', u's__']
516	New.CleanUp.ReferenceOTU155463$$[u'k__Bacteria', u'p__Proteobacteria', u'c__Alphaproteobacteria', u'o__Rhodospirillales', u'f__Rhodospirillaceae', u'g__', u's__']
517	New.CleanUp.ReferenceOTU161882$$[u'k__Bacteria', u'p__Proteobacteria', u'c__Betaproteobacteria', u'o__Burkholderiales', u'f__Comamonadaceae']
518	New.CleanUp.ReferenceOTU162951$$[u'k__Bacteria', u'p__Proteobacteria', u'c__Deltaproteobacteria', u'o__Myxococcales', u'f__', u'g__', u's__']
519	New.CleanUp.ReferenceOTU172214$$[u'k__Bacteria', u'p__Proteobacteria', u'c__Betaproteobacteria', u'o__MND1', u'f__', u'g__', u's__']
520	New.CleanUp.ReferenceOTU173932$$[u'k__Bacteria', u'p__Proteobacteria', u'c__Betaproteobacteria', u'o__IS-44', u'f__', u'g__', u's__']
521	New.CleanUp.ReferenceOTU210671$$[u'k__Bacteria', u'p__Proteobacteria', u'c__Betaproteobacteria', u'o__Burkholderiales', u'f__Comamonadaceae']
522	New.CleanUp.ReferenceOTU220825$$[u'k__Bacteria', u'p__Proteobacteria', u'c__Betaproteobacteria', u'o__MND1', u'f__', u'g__', u's__']
523	New.CleanUp.ReferenceOTU223583$$[u'k__Bacteria', u'p__Proteobacteria', u'c__Alphaproteobacteria', u'o__Rhizobiales', u'f__', u'g__', u's__']
524	New.CleanUp.ReferenceOTU238723$$[u'k__Bacteria', u'p__Proteobacteria', u'c__Alphaproteobacteria', u'o__Sphingomonadales']
525	New.CleanUp.ReferenceOTU249463$$[u'k__Bacteria', u'p__Proteobacteria', u'c__Alphaproteobacteria', u'o__Rhizobiales', u'f__Hyphomicrobiaceae', u'g__Rhodoplanes', u's__']
526	New.CleanUp.ReferenceOTU255468$$[u'k__Bacteria', u'p__Chloroflexi', u'c__TK10', u'o__AKYG885', u'f__Dolo_23', u'g__', u's__']
527	New.CleanUp.ReferenceOTU268011$$[u'k__Bacteria', u'p__Proteobacteria', u'c__Alphaproteobacteria', u'o__Rhizobiales', u'f__Hyphomicrobiaceae', u'g__Hyphomicrobium', u's__']
528	New.CleanUp.ReferenceOTU278973$$[u'k__Bacteria', u'p__Acidobacteria', u'c__Acidobacteriia', u'o__Acidobacteriales', u'f__Koribacteraceae', u'g__', u's__']
529	New.CleanUp.ReferenceOTU304507$$[u'k__Bacteria', u'p__Proteobacteria', u'c__Betaproteobacteria', u'o__Burkholderiales', u'f__Oxalobacteraceae']
530	New.CleanUp.ReferenceOTU315509$$[u'k__Bacteria', u'p__Bacteroidetes', u'c__[Saprospirae]', u'o__[Saprospirales]', u'f__Saprospiraceae', u'g__', u's__']
531	New.CleanUp.ReferenceOTU321872$$[u'k__Bacteria', u'p__Proteobacteria', u'c__Deltaproteobacteria', u'o__Myxococcales', u'f__', u'g__', u's__']
532	New.CleanUp.ReferenceOTU345152$$[u'k__Bacteria', u'p__Proteobacteria', u'c__Deltaproteobacteria', u'o__Myxococcales', u'f__', u'g__', u's__']
533	New.CleanUp.ReferenceOTU349207$$[u'k__Bacteria', u'p__Proteobacteria', u'c__Alphaproteobacteria', u'o__Rhodospirillales', u'f__Rhodospirillaceae']
534	New.CleanUp.ReferenceOTU355170$$[u'k__Bacteria', u'p__Actinobacteria', u'c__Thermoleophilia', u'o__Gaiellales', u'f__', u'g__', u's__']
535	New.CleanUp.ReferenceOTU356645$$[u'k__Bacteria', u'p__Proteobacteria', u'c__Alphaproteobacteria', u'o__Rhizobiales']
536	New.CleanUp.ReferenceOTU356804$$[u'k__Bacteria', u'p__Planctomycetes', u'c__Phycisphaerae', u'o__WD2101', u'f__', u'g__', u's__']
537	New.CleanUp.ReferenceOTU367173$$[u'k__Bacteria', u'p__Proteobacteria', u'c__Alphaproteobacteria', u'o__Rhodospirillales', u'f__Acetobacteraceae']
538	New.CleanUp.ReferenceOTU372783$$[u'k__Bacteria', u'p__Proteobacteria', u'c__Gammaproteobacteria']
539	New.CleanUp.ReferenceOTU374624$$[u'k__Bacteria', u'p__Proteobacteria', u'c__Betaproteobacteria', u'o__Burkholderiales', u'f__Comamonadaceae']
540	New.CleanUp.ReferenceOTU379518$$[u'k__Bacteria', u'p__Actinobacteria', u'c__Acidimicrobiia', u'o__Acidimicrobiales']
541	New.CleanUp.ReferenceOTU395010$$[u'k__Bacteria', u'p__Actinobacteria', u'c__Actinobacteria', u'o__Actinomycetales', u'f__Kineosporiaceae', u'g__', u's__']
542	New.CleanUp.ReferenceOTU420399$$[u'k__Bacteria', u'p__Proteobacteria', u'c__Alphaproteobacteria', u'o__Rhizobiales']
543	New.CleanUp.ReferenceOTU427158$$[u'k__Bacteria', u'p__Verrucomicrobia', u'c__[Pedosphaerae]', u'o__[Pedosphaerales]', u'f__', u'g__', u's__']
544	New.CleanUp.ReferenceOTU433027$$[u'k__Bacteria', u'p__Proteobacteria', u'c__Deltaproteobacteria', u'o__Myxococcales', u'f__', u'g__', u's__']
545	New.CleanUp.ReferenceOTU439027$$[u'k__Bacteria', u'p__Verrucomicrobia', u'c__[Spartobacteria]', u'o__[Chthoniobacterales]', u'f__[Chthoniobacteraceae]', u'g__OR-59', u's__']
546	New.CleanUp.ReferenceOTU444217$$[u'k__Bacteria', u'p__Proteobacteria', u'c__Gammaproteobacteria', u'o__Xanthomonadales', u'f__Xanthomonadaceae']
547	New.CleanUp.ReferenceOTU448808$$[u'k__Bacteria', u'p__Proteobacteria', u'c__Alphaproteobacteria', u'o__Rhizobiales', u'f__Hyphomicrobiaceae', u'g__Hyphomicrobium']
548	New.CleanUp.ReferenceOTU459987$$[u'k__Bacteria', u'p__Bacteroidetes', u'c__BME43', u'o__', u'f__', u'g__', u's__']
549	New.CleanUp.ReferenceOTU464814$$[u'k__Bacteria', u'p__Proteobacteria', u'c__Alphaproteobacteria', u'o__Rhizobiales', u'f__Rhizobiaceae']
550	New.CleanUp.ReferenceOTU469790$$[u'k__Bacteria', u'p__Chloroflexi', u'c__Anaerolineae', u'o__SBR1031', u'f__A4b', u'g__', u's__']
551	New.CleanUp.ReferenceOTU475884$$[u'k__Bacteria', u'p__Chloroflexi', u'c__Ellin6529', u'o__', u'f__', u'g__', u's__']
552	New.CleanUp.ReferenceOTU491767$$[u'k__Bacteria', u'p__Proteobacteria', u'c__Gammaproteobacteria', u'o__Xanthomonadales', u'f__Sinobacteraceae', u'g__', u's__']
553	New.CleanUp.ReferenceOTU492221$$[u'k__Bacteria', u'p__Proteobacteria', u'c__Gammaproteobacteria', u'o__Xanthomonadales', u'f__Sinobacteraceae', u'g__', u's__']
554	New.CleanUp.ReferenceOTU500839$$[u'k__Bacteria', u'p__Proteobacteria', u'c__Betaproteobacteria', u'o__Burkholderiales', u'f__Comamonadaceae', u'g__Methylibium']
555	New.CleanUp.ReferenceOTU528938$$[u'k__Bacteria', u'p__Bacteroidetes', u'c__[Saprospirae]', u'o__[Saprospirales]', u'f__Chitinophagaceae', u'g__Sediminibacterium', u's__']
556	New.CleanUp.ReferenceOTU534133$$[u'k__Bacteria', u'p__Bacteroidetes', u'c__BME43', u'o__', u'f__', u'g__', u's__']
557	New.CleanUp.ReferenceOTU534676$$[u'k__Bacteria', u'p__Proteobacteria', u'c__Deltaproteobacteria', u'o__Myxococcales', u'f__Haliangiaceae', u'g__', u's__']
558	New.CleanUp.ReferenceOTU535725$$[u'k__Bacteria', u'p__Proteobacteria', u'c__Alphaproteobacteria', u'o__BD7-3', u'f__', u'g__', u's__']
559	New.CleanUp.ReferenceOTU540581$$[u'k__Bacteria', u'p__Acidobacteria', u'c__Solibacteres', u'o__Solibacterales', u'f__', u'g__', u's__']
560	New.CleanUp.ReferenceOTU566071$$[u'k__Bacteria', u'p__Proteobacteria', u'c__Betaproteobacteria', u'o__Burkholderiales', u'f__Comamonadaceae']
561	New.CleanUp.ReferenceOTU568731$$[u'k__Bacteria', u'p__Proteobacteria', u'c__Alphaproteobacteria', u'o__Sphingomonadales', u'f__Sphingomonadaceae', u'g__Sphingomonas', u's__']
562	New.CleanUp.ReferenceOTU572333$$[u'k__Bacteria', u'p__Verrucomicrobia', u'c__[Spartobacteria]', u'o__[Chthoniobacterales]', u'f__[Chthoniobacteraceae]', u'g__', u's__']
563	New.CleanUp.ReferenceOTU585648$$[u'k__Bacteria', u'p__Chloroflexi', u'c__Chloroflexi', u'o__[Roseiflexales]', u'f__', u'g__', u's__']
564	New.CleanUp.ReferenceOTU588195$$[u'k__Bacteria', u'p__Actinobacteria', u'c__Acidimicrobiia', u'o__Acidimicrobiales']
565	New.CleanUp.ReferenceOTU589039$$[u'k__Bacteria', u'p__Proteobacteria', u'c__Deltaproteobacteria', u'o__Myxococcales', u'f__', u'g__', u's__']
566	New.CleanUp.ReferenceOTU609675$$[u'k__Bacteria', u'p__Proteobacteria', u'c__Alphaproteobacteria', u'o__Rhodospirillales', u'f__Rhodospirillaceae', u'g__', u's__']
567	New.CleanUp.ReferenceOTU640432$$[u'k__Bacteria', u'p__Proteobacteria', u'c__Gammaproteobacteria', u'o__Xanthomonadales', u'f__Xanthomonadaceae', u'g__Dokdonella', u's__']
568	New.CleanUp.ReferenceOTU649156$$[u'k__Bacteria', u'p__Actinobacteria', u'c__Acidimicrobiia', u'o__Acidimicrobiales', u'f__C111', u'g__', u's__']
569	New.CleanUp.ReferenceOTU652771$$[u'k__Bacteria', u'p__OD1', u'c__ZB2', u'o__', u'f__', u'g__', u's__']
570	New.CleanUp.ReferenceOTU656302$$[u'k__Bacteria', u'p__Proteobacteria', u'c__Betaproteobacteria', u'o__Burkholderiales', u'f__Comamonadaceae', u'g__Rhodoferax', u's__']
571	New.CleanUp.ReferenceOTU660130$$[u'k__Bacteria', u'p__Proteobacteria', u'c__Deltaproteobacteria', u'o__Myxococcales', u'f__', u'g__', u's__']
572	New.CleanUp.ReferenceOTU665695$$[u'k__Bacteria', u'p__Proteobacteria', u'c__Deltaproteobacteria', u'o__Myxococcales']
573	New.CleanUp.ReferenceOTU674282$$[u'k__Bacteria', u'p__Proteobacteria', u'c__Gammaproteobacteria', u'o__Xanthomonadales', u'f__Sinobacteraceae', u'g__', u's__']
574	New.CleanUp.ReferenceOTU681750$$[u'k__Bacteria', u'p__Acidobacteria', u'c__Solibacteres', u'o__Solibacterales', u'f__', u'g__', u's__']
575	New.CleanUp.ReferenceOTU683225$$[u'k__Bacteria', u'p__Proteobacteria', u'c__Deltaproteobacteria', u'o__Myxococcales', u'f__Haliangiaceae', u'g__', u's__']
576	New.CleanUp.ReferenceOTU696393$$[u'k__Bacteria', u'p__Verrucomicrobia', u'c__[Pedosphaerae]', u'o__[Pedosphaerales]', u'f__Ellin517', u'g__', u's__']
577	New.CleanUp.ReferenceOTU700715$$[u'k__Bacteria', u'p__Proteobacteria', u'c__Deltaproteobacteria', u'o__Myxococcales', u'f__', u'g__', u's__']
578	New.CleanUp.ReferenceOTU707644$$[u'k__Bacteria', u'p__Proteobacteria', u'c__Betaproteobacteria', u'o__Rhodocyclales', u'f__Rhodocyclaceae', u'g__Propionivibrio', u's__']
579	New.CleanUp.ReferenceOTU714002$$[u'k__Bacteria', u'p__Proteobacteria', u'c__Alphaproteobacteria', u'o__Rhizobiales', u'f__Bradyrhizobiaceae', u'g__Bosea', u's__genosp.']
580	New.CleanUp.ReferenceOTU731981$$[u'k__Bacteria', u'p__Actinobacteria', u'c__Acidimicrobiia', u'o__Acidimicrobiales']
581	New.CleanUp.ReferenceOTU756644$$[u'k__Bacteria', u'p__OD1', u'c__ZB2', u'o__', u'f__', u'g__', u's__']
582	2183687$$[u'k__Bacteria', u'p__Proteobacteria', u'c__Betaproteobacteria', u'o__Ellin6067', u'f__', u'g__', u's__']
583	4375014$$[u'k__Bacteria', u'p__Acidobacteria', u'c__Solibacteres', u'o__Solibacterales', u'f__Solibacteraceae', u'g__Candidatus Solibacter', u's__']
584	4378776$$[u'k__Bacteria', u'p__Proteobacteria', u'c__Alphaproteobacteria', u'o__Rhizobiales', u'f__Hyphomicrobiaceae', u'g__Devosia', u's__']
585	795096$$[u'k__Bacteria', u'p__Proteobacteria', u'c__Alphaproteobacteria', u'o__Rhizobiales', u'f__Phyllobacteriaceae', u'g__Mesorhizobium']
586	875049$$[u'k__Bacteria', u'p__Actinobacteria', u'c__Actinobacteria', u'o__Actinomycetales', u'f__Nocardioidaceae', u'g__Nocardioides', u's__']
587	3802893$$[u'k__Bacteria', u'p__Proteobacteria', u'c__Betaproteobacteria', u'o__MND1', u'f__', u'g__', u's__']
588	1000876$$[u'k__Bacteria', u'p__Actinobacteria', u'c__Actinobacteria', u'o__Actinomycetales', u'f__Nocardioidaceae', u'g__Nocardioides', u's__']
589	247758$$[u'k__Bacteria', u'p__Actinobacteria', u'c__Actinobacteria', u'o__Actinomycetales', u'f__Nocardioidaceae', u'g__Kribbella', u's__']
590	217328$$[u'k__Bacteria', u'p__Proteobacteria', u'c__Deltaproteobacteria', u'o__Myxococcales', u'f__Haliangiaceae', u'g__', u's__']
591	675804$$[u'k__Bacteria', u'p__Acidobacteria', u'c__Acidobacteria-6', u'o__iii1-15', u'f__', u'g__', u's__']
592	767841$$[u'k__Bacteria', u'p__Proteobacteria', u'c__Alphaproteobacteria', u'o__Sphingomonadales', u'f__Sphingomonadaceae', u'g__Kaistobacter', u's__']
593	4418001$$[u'k__Bacteria', u'p__Proteobacteria', u'c__Alphaproteobacteria', u'o__Rhizobiales', u'f__Hyphomicrobiaceae', u'g__Rhodoplanes', u's__']
594	322919$$[u'k__Bacteria', u'p__Acidobacteria', u'c__Acidobacteria-6', u'o__iii1-15', u'f__', u'g__', u's__']
595	205245$$[u'k__Bacteria', u'p__Proteobacteria', u'c__Betaproteobacteria', u'o__Burkholderiales', u'f__Comamonadaceae', u'g__Variovorax', u's__paradoxus']
596	139220$$[u'k__Bacteria', u'p__Proteobacteria', u'c__Gammaproteobacteria', u'o__Xanthomonadales', u'f__Xanthomonadaceae', u'g__', u's__']
597	224203$$[u'k__Bacteria', u'p__Acidobacteria', u'c__Solibacteres', u'o__Solibacterales', u'f__Solibacteraceae', u'g__Candidatus Solibacter', u's__']
598	3926677$$[u'k__Bacteria', u'p__Proteobacteria', u'c__Betaproteobacteria', u'o__Burkholderiales', u'f__Comamonadaceae', u'g__Acidovorax']
599	1104782$$[u'k__Bacteria', u'p__Proteobacteria', u'c__Betaproteobacteria', u'o__Ellin6067', u'f__', u'g__', u's__']
600	811263$$[u'k__Bacteria', u'p__Actinobacteria', u'c__Thermoleophilia', u'o__Gaiellales', u'f__Gaiellaceae', u'g__', u's__']
601	833174$$[u'k__Bacteria', u'p__Proteobacteria', u'c__Gammaproteobacteria', u'o__Pseudomonadales', u'f__Pseudomonadaceae', u'g__Pseudomonas']
602	512378$$[u'k__Bacteria', u'p__Actinobacteria', u'c__Actinobacteria', u'o__Actinomycetales', u'f__Nocardioidaceae', u'g__', u's__']
603	136162$$[u'k__Bacteria', u'p__Proteobacteria', u'c__Alphaproteobacteria', u'o__Rhizobiales', u'f__Hyphomicrobiaceae', u'g__Rhodoplanes', u's__']
604	236255$$[u'k__Bacteria', u'p__Verrucomicrobia', u'c__[Spartobacteria]', u'o__[Chthoniobacterales]', u'f__[Chthoniobacteraceae]', u'g__DA101', u's__']
605	11427$$[u'k__Bacteria', u'p__Actinobacteria', u'c__Actinobacteria', u'o__Actinomycetales', u'f__Geodermatophilaceae', u'g__', u's__']
606	113224$$[u'k__Bacteria', u'p__Gemmatimonadetes', u'c__Gemm-1', u'o__', u'f__', u'g__', u's__']
607	285061$$[u'k__Bacteria', u'p__Proteobacteria', u'c__Alphaproteobacteria', u'o__Rhizobiales', u'f__Hyphomicrobiaceae', u'g__Pedomicrobium', u's__']
608	783719$$[u'k__Bacteria', u'p__Proteobacteria', u'c__Betaproteobacteria', u'o__Burkholderiales', u'f__Comamonadaceae']
609	242930$$[u'k__Bacteria', u'p__Proteobacteria', u'c__Alphaproteobacteria', u'o__Rhizobiales', u'f__Phyllobacteriaceae', u'g__Mesorhizobium', u's__']
610	101884$$[u'k__Bacteria', u'p__Proteobacteria', u'c__Betaproteobacteria', u'o__', u'f__', u'g__', u's__']
611	210344$$[u'k__Bacteria', u'p__Proteobacteria', u'c__Alphaproteobacteria', u'o__Rhizobiales', u'f__Hyphomicrobiaceae', u'g__Pedomicrobium', u's__']
612	239739$$[u'k__Bacteria', u'p__Actinobacteria', u'c__Actinobacteria', u'o__Actinomycetales', u'f__Nocardioidaceae']
613	4359104$$[u'k__Bacteria', u'p__Acidobacteria', u'c__Acidobacteria-6', u'o__iii1-15', u'f__', u'g__', u's__']
614	361100$$[u'k__Bacteria', u'p__Proteobacteria', u'c__Betaproteobacteria', u'o__MND1', u'f__', u'g__', u's__']
615	87167$$[u'k__Bacteria', u'p__Proteobacteria', u'c__Alphaproteobacteria', u'o__Sphingomonadales', u'f__Sphingomonadaceae', u'g__Sphingomonas', u's__wittichii']
616	New.ReferenceOTU1665$$[u'k__Bacteria', u'p__Actinobacteria', u'c__Thermoleophilia', u'o__Gaiellales', u'f__Gaiellaceae', u'g__', u's__']
617	New.ReferenceOTU1315$$[u'k__Bacteria', u'p__Actinobacteria', u'c__Thermoleophilia', u'o__Gaiellales', u'f__Gaiellaceae', u'g__', u's__']
618	New.ReferenceOTU618$$[u'k__Bacteria', u'p__Actinobacteria', u'c__Actinobacteria', u'o__Actinomycetales']
619	New.ReferenceOTU541$$[u'k__Bacteria', u'p__Proteobacteria', u'c__Deltaproteobacteria', u'o__Myxococcales', u'f__', u'g__', u's__']
620	New.ReferenceOTU1928$$[u'k__Bacteria', u'p__Chloroflexi', u'c__Ellin6529', u'o__', u'f__', u'g__', u's__']
621	New.ReferenceOTU1258$$[u'k__Bacteria', u'p__Actinobacteria', u'c__Thermoleophilia', u'o__Gaiellales', u'f__Gaiellaceae', u'g__', u's__']
622	New.ReferenceOTU2073$$[u'k__Bacteria', u'p__Chloroflexi', u'c__Ellin6529', u'o__', u'f__', u'g__', u's__']
623	New.ReferenceOTU1123$$[u'k__Bacteria', u'p__Gemmatimonadetes', u'c__Gemmatimonadetes', u'o__Gemmatimonadales', u'f__Ellin5301', u'g__', u's__']
624	New.ReferenceOTU574$$[u'k__Bacteria', u'p__Proteobacteria', u'c__Betaproteobacteria', u'o__SC-I-84', u'f__', u'g__', u's__']
625	New.ReferenceOTU183$$[u'k__Bacteria', u'p__Proteobacteria', u'c__Alphaproteobacteria', u'o__Rhodospirillales', u'f__Rhodospirillaceae', u'g__', u's__']
626	New.ReferenceOTU2603$$[u'k__Bacteria', u'p__Actinobacteria', u'c__Actinobacteria', u'o__Actinomycetales', u'f__Microbacteriaceae', u'g__Microbacterium']
627	New.ReferenceOTU1176$$[u'k__Bacteria', u'p__Proteobacteria', u'c__Betaproteobacteria', u'o__Burkholderiales', u'f__Comamonadaceae']
628	New.ReferenceOTU1484$$[u'k__Bacteria', u'p__Nitrospirae', u'c__Nitrospira', u'o__Nitrospirales', u'f__Nitrospiraceae', u'g__Nitrospira', u's__']
629	New.ReferenceOTU2454$$[u'k__Bacteria', u'p__Proteobacteria', u'c__Betaproteobacteria', u'o__Burkholderiales', u'f__Comamonadaceae', u'g__Acidovorax']
630	New.ReferenceOTU525$$[u'k__Bacteria', u'p__Acidobacteria', u'c__Acidobacteria-6', u'o__iii1-15', u'f__', u'g__', u's__']
631	New.ReferenceOTU1279$$[u'k__Bacteria', u'p__Proteobacteria', u'c__Gammaproteobacteria', u'o__Pseudomonadales', u'f__Pseudomonadaceae', u'g__Pseudomonas']
632	New.ReferenceOTU53$$[u'k__Bacteria', u'p__Proteobacteria', u'c__Deltaproteobacteria', u'o__Myxococcales']
633	New.ReferenceOTU1730$$[u'k__Bacteria', u'p__Proteobacteria', u'c__Deltaproteobacteria', u'o__Myxococcales', u'f__Polyangiaceae', u'g__', u's__']
634	New.ReferenceOTU1188$$[u'k__Bacteria', u'p__Proteobacteria', u'c__Betaproteobacteria', u'o__Burkholderiales', u'f__Comamonadaceae', u'g__Delftia', u's__']
635	New.ReferenceOTU2758$$[u'k__Bacteria', u'p__Proteobacteria', u'c__Alphaproteobacteria', u'o__Rhizobiales', u'f__Bradyrhizobiaceae']
636	New.CleanUp.ReferenceOTU255292$$[u'k__Bacteria', u'p__Proteobacteria', u'c__Betaproteobacteria', u'o__SC-I-84', u'f__', u'g__', u's__']
637	New.CleanUp.ReferenceOTU306149$$[u'k__Bacteria', u'p__Actinobacteria', u'c__Thermoleophilia', u'o__Gaiellales', u'f__Gaiellaceae', u'g__', u's__']
638	New.CleanUp.ReferenceOTU394474$$[u'k__Bacteria', u'p__Acidobacteria', u'c__Acidobacteria-6', u'o__iii1-15', u'f__', u'g__', u's__']
639	New.CleanUp.ReferenceOTU395578$$[u'k__Bacteria', u'p__Actinobacteria', u'c__Thermoleophilia', u'o__Gaiellales', u'f__', u'g__', u's__']
640	New.CleanUp.ReferenceOTU449573$$[u'k__Bacteria', u'p__Proteobacteria', u'c__Gammaproteobacteria', u'o__Xanthomonadales', u'f__Xanthomonadaceae']
641	New.CleanUp.ReferenceOTU611409$$[u'k__Bacteria', u'p__Proteobacteria', u'c__Gammaproteobacteria', u'o__Xanthomonadales', u'f__Sinobacteraceae', u'g__', u's__']
642	New.CleanUp.ReferenceOTU646008$$[u'k__Bacteria', u'p__Proteobacteria', u'c__Alphaproteobacteria', u'o__Sphingomonadales', u'f__Sphingomonadaceae', u'g__Kaistobacter', u's__']
643	New.CleanUp.ReferenceOTU719357$$[u'k__Bacteria', u'p__Proteobacteria', u'c__Deltaproteobacteria', u'o__Myxococcales', u'f__Haliangiaceae', u'g__', u's__']
644	New.CleanUp.ReferenceOTU758088$$[u'k__Bacteria', u'p__Proteobacteria', u'c__Betaproteobacteria', u'o__Burkholderiales', u'f__Comamonadaceae', u'g__Ramlibacter', u's__']
645	765676$$[u'k__Bacteria', u'p__Proteobacteria', u'c__Alphaproteobacteria', u'o__Rhizobiales', u'f__Rhodobiaceae', u'g__Afifella', u's__']
646	4358255$$[u'k__Bacteria', u'p__Proteobacteria', u'c__Deltaproteobacteria', u'o__Myxococcales']
647	4435199$$[u'k__Bacteria', u'p__Proteobacteria', u'c__Alphaproteobacteria', u'o__Sphingomonadales']
648	4330963$$[u'k__Bacteria', u'p__Proteobacteria', u'c__Deltaproteobacteria', u'o__Myxococcales', u'f__', u'g__', u's__']
649	1068936$$[u'k__Bacteria', u'p__Actinobacteria', u'c__Acidimicrobiia', u'o__Acidimicrobiales', u'f__', u'g__', u's__']
650	144640$$[u'k__Bacteria', u'p__Proteobacteria', u'c__Betaproteobacteria', u'o__Burkholderiales', u'f__Comamonadaceae', u'g__Acidovorax']
651	207124$$[u'k__Bacteria', u'p__Actinobacteria', u'c__Acidimicrobiia', u'o__Acidimicrobiales']
652	4345857$$[u'k__Bacteria', u'p__Proteobacteria', u'c__Deltaproteobacteria', u'o__Myxococcales', u'f__', u'g__', u's__']
653	4109984$$[u'k__Bacteria', u'p__Chloroflexi', u'c__Anaerolineae', u'o__SBR1031', u'f__A4b', u'g__', u's__']
654	720217$$[u'k__Bacteria', u'p__Proteobacteria', u'c__Deltaproteobacteria', u'o__Myxococcales', u'f__Haliangiaceae', u'g__', u's__']
655	4294646$$[u'k__Bacteria', u'p__Proteobacteria', u'c__Alphaproteobacteria', u'o__Rhizobiales', u'f__Rhizobiaceae']
656	147541$$[u'k__Bacteria', u'p__Proteobacteria', u'c__Alphaproteobacteria', u'o__Rhizobiales', u'f__Bradyrhizobiaceae', u'g__Bradyrhizobium', u's__']
657	802097$$[u'k__Bacteria', u'p__TM7', u'c__TM7-1', u'o__', u'f__', u'g__', u's__']
658	829266$$[u'k__Bacteria', u'p__Proteobacteria', u'c__Gammaproteobacteria', u'o__Xanthomonadales', u'f__Xanthomonadaceae']
659	582921$$[u'k__Bacteria', u'p__Proteobacteria', u'c__Alphaproteobacteria', u'o__Sphingomonadales', u'f__Sphingomonadaceae', u'g__Sphingomonas', u's__']
660	3868361$$[u'k__Bacteria', u'p__Acidobacteria', u'c__Solibacteres', u'o__Solibacterales', u'f__', u'g__', u's__']
661	1637278$$[u'k__Bacteria', u'p__Proteobacteria', u'c__Alphaproteobacteria', u'o__Rhizobiales', u'f__Hyphomicrobiaceae', u'g__Rhodoplanes', u's__']
662	809485$$[u'k__Bacteria', u'p__Bacteroidetes', u'c__Cytophagia', u'o__Cytophagales', u'f__Cytophagaceae', u'g__', u's__']
663	112949$$[u'k__Bacteria', u'p__Chloroflexi', u'c__TK10', u'o__AKYG885', u'f__Dolo_23', u'g__', u's__']
664	4398400$$[u'k__Bacteria', u'p__Acidobacteria', u'c__[Chloracidobacteria]', u'o__RB41', u'f__Ellin6075', u'g__', u's__']
665	242829$$[u'k__Bacteria', u'p__Proteobacteria', u'c__Alphaproteobacteria', u'o__Caulobacterales', u'f__Caulobacteraceae', u'g__Phenylobacterium', u's__']
666	114587$$[u'k__Bacteria', u'p__Actinobacteria', u'c__Actinobacteria', u'o__Actinomycetales', u'f__Pseudonocardiaceae', u'g__Pseudonocardia', u's__']
667	227344$$[u'k__Bacteria', u'p__Proteobacteria', u'c__Alphaproteobacteria', u'o__Rhizobiales', u'f__Phyllobacteriaceae']
668	790392$$[u'k__Bacteria', u'p__Acidobacteria', u'c__Solibacteres', u'o__Solibacterales', u'f__Solibacteraceae', u'g__Candidatus Solibacter', u's__']
669	4463632$$[u'k__Bacteria', u'p__Acidobacteria', u'c__Acidobacteria-6', u'o__iii1-15', u'f__', u'g__', u's__']
670	630818$$[u'k__Bacteria', u'p__Actinobacteria', u'c__Acidimicrobiia', u'o__Acidimicrobiales', u'f__EB1017', u'g__', u's__']
671	586084$$[u'k__Bacteria', u'p__Actinobacteria', u'c__Actinobacteria', u'o__Actinomycetales', u'f__Streptosporangiaceae', u'g__', u's__']
672	157614$$[u'k__Bacteria', u'p__Proteobacteria', u'c__Alphaproteobacteria', u'o__Rhizobiales', u'f__Rhizobiaceae']
673	4451937$$[u'k__Bacteria', u'p__Proteobacteria', u'c__Alphaproteobacteria', u'o__Rhizobiales']
674	1637549$$[u'k__Bacteria', u'p__Bacteroidetes', u'c__[Saprospirae]', u'o__[Saprospirales]', u'f__Chitinophagaceae']
675	593358$$[u'k__Bacteria', u'p__Proteobacteria', u'c__Deltaproteobacteria', u'o__Myxococcales', u'f__', u'g__', u's__']
676	890805$$[u'k__Bacteria', u'p__Proteobacteria', u'c__Alphaproteobacteria', u'o__Rhizobiales', u'f__Hyphomicrobiaceae', u'g__Devosia', u's__']
677	4479701$$[u'k__Bacteria', u'p__Proteobacteria', u'c__Alphaproteobacteria', u'o__Rhizobiales', u'f__Hyphomicrobiaceae', u'g__Pedomicrobium', u's__']
678	758877$$[u'k__Bacteria', u'p__Proteobacteria', u'c__Betaproteobacteria', u'o__Burkholderiales', u'f__Comamonadaceae']
679	539915$$[u'k__Bacteria', u'p__Proteobacteria', u'c__Betaproteobacteria', u'o__Burkholderiales', u'f__Oxalobacteraceae', u'g__Janthinobacterium', u's__']
680	538790$$[u'k__Bacteria', u'p__Actinobacteria', u'c__Actinobacteria', u'o__Actinomycetales', u'f__Microbacteriaceae']
681	4369700$$[u'k__Bacteria', u'p__Actinobacteria', u'c__Acidimicrobiia', u'o__Acidimicrobiales', u'f__C111', u'g__', u's__']
682	583233$$[u'k__Bacteria', u'p__Planctomycetes', u'c__Planctomycetia', u'o__Pirellulales', u'f__Pirellulaceae', u'g__', u's__']
683	1616779$$[u'k__Bacteria', u'p__Acidobacteria', u'c__iii1-8', u'o__DS-18', u'f__', u'g__', u's__']
684	1908796$$[u'k__Bacteria', u'p__Proteobacteria', u'c__Betaproteobacteria', u'o__Burkholderiales', u'f__Comamonadaceae']
685	1640195$$[u'k__Bacteria', u'p__Proteobacteria', u'c__Alphaproteobacteria', u'o__Rhodospirillales', u'f__Rhodospirillaceae', u'g__', u's__']
686	311656$$[u'k__Bacteria', u'p__Bacteroidetes', u'c__[Saprospirae]', u'o__[Saprospirales]', u'f__Chitinophagaceae', u'g__Flavisolibacter', u's__']
687	1107985$$[u'k__Bacteria', u'p__Proteobacteria', u'c__Deltaproteobacteria', u'o__Myxococcales', u'f__', u'g__', u's__']
688	562008$$[u'k__Bacteria', u'p__Proteobacteria', u'c__Gammaproteobacteria', u'o__Xanthomonadales', u'f__Sinobacteraceae', u'g__Steroidobacter', u's__']
689	825452$$[u'k__Bacteria', u'p__Proteobacteria', u'c__Alphaproteobacteria', u'o__Rhodospirillales', u'f__', u'g__', u's__']
690	537664$$[u'k__Bacteria', u'p__Proteobacteria', u'c__Alphaproteobacteria', u'o__Rhizobiales']
691	4128584$$[u'k__Bacteria', u'p__Planctomycetes', u'c__Phycisphaerae', u'o__WD2101', u'f__', u'g__', u's__']
692	894047$$[u'k__Bacteria', u'p__Actinobacteria', u'c__Acidimicrobiia', u'o__Acidimicrobiales', u'f__C111', u'g__', u's__']
693	637937$$[u'k__Bacteria', u'p__Acidobacteria', u'c__Acidobacteria-6', u'o__CCU21', u'f__', u'g__', u's__']
694	142376$$[u'k__Bacteria', u'p__Proteobacteria', u'c__Betaproteobacteria', u'o__Burkholderiales', u'f__Comamonadaceae']
695	989109$$[u'k__Bacteria', u'p__Proteobacteria', u'c__Alphaproteobacteria', u'o__Sphingomonadales', u'f__Sphingomonadaceae', u'g__Kaistobacter', u's__']
696	1053194$$[u'k__Bacteria', u'p__Proteobacteria', u'c__Gammaproteobacteria', u'o__Xanthomonadales', u'f__Sinobacteraceae', u'g__', u's__']
697	567843$$[u'k__Bacteria', u'p__Acidobacteria']
698	4312075$$[u'k__Bacteria', u'p__Bacteroidetes', u'c__[Saprospirae]', u'o__[Saprospirales]', u'f__Saprospiraceae', u'g__', u's__']
699	4377645$$[u'k__Bacteria', u'p__Acidobacteria', u'c__Solibacteres', u'o__Solibacterales', u'f__', u'g__', u's__']
700	245652$$[u'k__Bacteria', u'p__Bacteroidetes', u'c__[Saprospirae]', u'o__[Saprospirales]', u'f__Chitinophagaceae', u'g__', u's__']
701	131892$$[u'k__Bacteria', u'p__Proteobacteria', u'c__Alphaproteobacteria', u'o__Sphingomonadales', u'f__Sphingomonadaceae', u'g__Kaistobacter', u's__']
702	3937304$$[u'k__Bacteria', u'p__Proteobacteria', u'c__Alphaproteobacteria', u'o__Sphingomonadales', u'f__Sphingomonadaceae', u'g__Kaistobacter', u's__']
703	65683$$[u'k__Bacteria', u'p__Planctomycetes', u'c__Phycisphaerae', u'o__WD2101', u'f__', u'g__', u's__']
704	4429771$$[u'k__Bacteria', u'p__Proteobacteria', u'c__Betaproteobacteria', u'o__Burkholderiales', u'f__Comamonadaceae', u'g__Acidovorax']
705	4327555$$[u'k__Bacteria', u'p__Acidobacteria', u'c__Solibacteres', u'o__Solibacterales', u'f__', u'g__', u's__']
706	1899743$$[u'k__Bacteria', u'p__Proteobacteria', u'c__Deltaproteobacteria', u'o__Myxococcales', u'f__', u'g__', u's__']
707	4468934$$[u'k__Bacteria', u'p__Chloroflexi', u'c__TK10', u'o__AKYG885', u'f__Dolo_23', u'g__', u's__']
708	4382894$$[u'k__Bacteria', u'p__Proteobacteria', u'c__Betaproteobacteria', u'o__Burkholderiales', u'f__Oxalobacteraceae', u'g__Janthinobacterium', u's__']
709	114410$$[u'k__Bacteria', u'p__Proteobacteria', u'c__Betaproteobacteria', u'o__Burkholderiales', u'f__Alcaligenaceae', u'g__', u's__']
710	824146$$[u'k__Bacteria', u'p__Proteobacteria', u'c__Alphaproteobacteria', u'o__Sphingomonadales', u'f__Sphingomonadaceae', u'g__Kaistobacter', u's__']
711	208637$$[u'k__Bacteria', u'p__Proteobacteria', u'c__Alphaproteobacteria', u'o__Rhizobiales', u'f__Xanthobacteraceae']
712	325776$$[u'k__Bacteria', u'p__Bacteroidetes', u'c__[Saprospirae]', u'o__[Saprospirales]', u'f__Chitinophagaceae', u'g__', u's__']
713	4295954$$[u'k__Bacteria', u'p__Proteobacteria', u'c__Betaproteobacteria', u'o__Burkholderiales', u'f__Comamonadaceae']
714	216375$$[u'k__Bacteria', u'p__Planctomycetes', u'c__Phycisphaerae', u'o__WD2101', u'f__', u'g__', u's__']
715	4310542$$[u'k__Bacteria', u'p__Actinobacteria', u'c__Actinobacteria', u'o__Actinomycetales', u'f__Streptomycetaceae']
716	99073$$[u'k__Bacteria', u'p__Proteobacteria', u'c__Alphaproteobacteria', u'o__Rhizobiales', u'f__Xanthobacteraceae', u'g__Labrys', u's__']
717	225041$$[u'k__Bacteria', u'p__Chloroflexi', u'c__Chloroflexi', u'o__[Roseiflexales]', u'f__[Kouleothrixaceae]', u'g__', u's__']
718	216350$$[u'k__Bacteria', u'p__Bacteroidetes', u'c__[Saprospirae]', u'o__[Saprospirales]', u'f__Chitinophagaceae']
719	1111050$$[u'k__Bacteria', u'p__Chloroflexi', u'c__Chloroflexi', u'o__[Roseiflexales]', u'f__', u'g__', u's__']
720	1119668$$[u'k__Bacteria', u'p__Proteobacteria', u'c__Alphaproteobacteria', u'o__Rhizobiales', u'f__Hyphomicrobiaceae', u'g__Devosia', u's__']
721	205635$$[u'k__Bacteria', u'p__Acidobacteria', u'c__Solibacteres', u'o__Solibacterales', u'f__', u'g__', u's__']
722	61836$$[u'k__Bacteria', u'p__Proteobacteria', u'c__Betaproteobacteria', u'o__Burkholderiales', u'f__Comamonadaceae']
723	4377277$$[u'k__Bacteria', u'p__Gemmatimonadetes', u'c__Gemmatimonadetes', u'o__Ellin5290', u'f__', u'g__', u's__']
724	698517$$[u'k__Bacteria', u'p__Proteobacteria', u'c__Betaproteobacteria', u'o__Ellin6067', u'f__', u'g__', u's__']
725	580578$$[u'k__Bacteria', u'p__Proteobacteria', u'c__Betaproteobacteria', u'o__Burkholderiales', u'f__Comamonadaceae']
726	869471$$[u'k__Bacteria', u'p__Proteobacteria', u'c__Alphaproteobacteria', u'o__Sphingomonadales', u'f__Sphingomonadaceae']
727	895220$$[u'k__Bacteria', u'p__Proteobacteria', u'c__Betaproteobacteria', u'o__Burkholderiales', u'f__Comamonadaceae']
728	685744$$[u'k__Bacteria', u'p__Acidobacteria', u'c__Solibacteres', u'o__Solibacterales', u'f__', u'g__', u's__']
729	815498$$[u'k__Bacteria', u'p__Actinobacteria', u'c__Actinobacteria', u'o__Actinomycetales', u'f__Mycobacteriaceae', u'g__Mycobacterium', u's__']
730	4170464$$[u'k__Bacteria', u'p__Proteobacteria', u'c__Betaproteobacteria', u'o__Burkholderiales', u'f__Comamonadaceae']
731	1026261$$[u'k__Bacteria', u'p__Proteobacteria', u'c__Deltaproteobacteria', u'o__Myxococcales', u'f__', u'g__', u's__']
732	992428$$[u'k__Bacteria', u'p__Verrucomicrobia', u'c__[Pedosphaerae]', u'o__[Pedosphaerales]', u'f__Ellin517', u'g__', u's__']
733	4349313$$[u'k__Bacteria', u'p__Verrucomicrobia', u'c__[Pedosphaerae]', u'o__[Pedosphaerales]', u'f__Ellin517', u'g__', u's__']
734	758928$$[u'k__Bacteria', u'p__Bacteroidetes', u'c__[Saprospirae]', u'o__[Saprospirales]', u'f__Saprospiraceae', u'g__', u's__']
735	336364$$[u'k__Bacteria', u'p__Proteobacteria', u'c__Alphaproteobacteria', u'o__Rhizobiales', u'f__Rhizobiaceae']
736	2313705$$[u'k__Bacteria', u'p__Proteobacteria', u'c__Alphaproteobacteria', u'o__Sphingomonadales', u'f__Sphingomonadaceae']
737	1094453$$[u'k__Bacteria', u'p__Proteobacteria', u'c__Alphaproteobacteria', u'o__Sphingomonadales', u'f__Sphingomonadaceae']
738	205156$$[u'k__Bacteria', u'p__Proteobacteria', u'c__Alphaproteobacteria', u'o__Rhizobiales', u'f__Hyphomicrobiaceae', u'g__Rhodoplanes', u's__']
739	329072$$[u'k__Bacteria', u'p__Acidobacteria', u'c__Acidobacteria-6', u'o__iii1-15', u'f__RB40', u'g__', u's__']
740	343239$$[u'k__Bacteria', u'p__Proteobacteria', u'c__Betaproteobacteria', u'o__Burkholderiales', u'f__Comamonadaceae', u'g__Acidovorax']
741	238281$$[u'k__Bacteria', u'p__TM7', u'c__TM7-1', u'o__', u'f__', u'g__', u's__']
742	529793$$[u'k__Bacteria', u'p__Actinobacteria', u'c__Acidimicrobiia', u'o__Acidimicrobiales', u'f__EB1017', u'g__', u's__']
743	220551$$[u'k__Bacteria', u'p__Proteobacteria', u'c__Betaproteobacteria', u'o__Ellin6067', u'f__', u'g__', u's__']
744	3078468$$[u'k__Bacteria', u'p__Proteobacteria', u'c__Alphaproteobacteria', u'o__Rhizobiales', u'f__Hyphomicrobiaceae']
745	2063454$$[u'k__Bacteria', u'p__Bacteroidetes', u'c__Cytophagia', u'o__Cytophagales', u'f__Cytophagaceae', u'g__', u's__']
746	New.ReferenceOTU2192$$[u'k__Bacteria', u'p__Planctomycetes', u'c__Phycisphaerae', u'o__WD2101', u'f__', u'g__', u's__']
747	New.ReferenceOTU670$$[u'k__Bacteria', u'p__Verrucomicrobia', u'c__Verrucomicrobiae', u'o__Verrucomicrobiales', u'f__Verrucomicrobiaceae', u'g__Luteolibacter', u's__']
748	New.ReferenceOTU1670$$[u'k__Bacteria', u'p__Chloroflexi', u'c__Ellin6529', u'o__', u'f__', u'g__', u's__']
749	New.ReferenceOTU1304$$[u'k__Bacteria', u'p__Proteobacteria', u'c__Betaproteobacteria', u'o__', u'f__', u'g__', u's__']
750	New.ReferenceOTU1792$$[u'k__Bacteria', u'p__Proteobacteria', u'c__Betaproteobacteria', u'o__Burkholderiales', u'f__Comamonadaceae']
751	New.ReferenceOTU1336$$[u'k__Bacteria', u'p__Proteobacteria', u'c__Deltaproteobacteria', u'o__Myxococcales', u'f__', u'g__', u's__']
752	New.ReferenceOTU2650$$[u'k__Bacteria', u'p__Acidobacteria', u'c__Acidobacteria-6', u'o__iii1-15', u'f__', u'g__', u's__']
753	New.ReferenceOTU1653$$[u'k__Bacteria', u'p__Actinobacteria', u'c__Thermoleophilia', u'o__Solirubrobacterales', u'f__', u'g__', u's__']
754	New.ReferenceOTU1325$$[u'k__Bacteria', u'p__Acidobacteria', u'c__Solibacteres', u'o__Solibacterales', u'f__', u'g__', u's__']
755	New.ReferenceOTU137$$[u'k__Bacteria', u'p__Bacteroidetes', u'c__[Saprospirae]', u'o__[Saprospirales]', u'f__Chitinophagaceae']
756	New.ReferenceOTU950$$[u'k__Bacteria', u'p__Actinobacteria', u'c__Actinobacteria', u'o__Actinomycetales', u'f__Microbacteriaceae']
757	New.ReferenceOTU952$$[u'k__Bacteria', u'p__Proteobacteria', u'c__Deltaproteobacteria', u'o__Myxococcales', u'f__', u'g__', u's__']
758	New.ReferenceOTU2076$$[u'k__Bacteria', u'p__Proteobacteria', u'c__Alphaproteobacteria', u'o__Sphingomonadales', u'f__Sphingomonadaceae']
759	New.ReferenceOTU2103$$[u'k__Bacteria', u'p__Actinobacteria', u'c__Thermoleophilia', u'o__Gaiellales', u'f__', u'g__', u's__']
760	New.ReferenceOTU1121$$[u'k__Bacteria', u'p__Verrucomicrobia', u'c__[Spartobacteria]', u'o__[Chthoniobacterales]', u'f__[Chthoniobacteraceae]', u'g__Candidatus Xiphinematobacter', u's__']
761	New.ReferenceOTU1346$$[u'k__Bacteria', u'p__Proteobacteria', u'c__Alphaproteobacteria', u'o__Rhizobiales', u'f__Hyphomicrobiaceae', u'g__Hyphomicrobium']
762	New.ReferenceOTU390$$[u'k__Bacteria', u'p__Fibrobacteres', u'c__Fibrobacteria', u'o__258ds10', u'f__', u'g__', u's__']
763	New.ReferenceOTU151$$[u'k__Bacteria', u'p__Actinobacteria']
764	New.ReferenceOTU2662$$[u'k__Bacteria', u'p__Planctomycetes', u'c__Phycisphaerae', u'o__WD2101', u'f__', u'g__', u's__']
765	New.ReferenceOTU18$$[u'k__Bacteria', u'p__Proteobacteria', u'c__Alphaproteobacteria', u'o__Rhizobiales', u'f__Rhizobiaceae']
766	New.ReferenceOTU1209$$[u'k__Bacteria', u'p__Fibrobacteres', u'c__Fibrobacteria', u'o__258ds10', u'f__', u'g__', u's__']
767	New.ReferenceOTU1110$$[u'k__Bacteria', u'p__Proteobacteria', u'c__Gammaproteobacteria', u'o__Xanthomonadales', u'f__Sinobacteraceae', u'g__', u's__']
768	New.ReferenceOTU365$$[u'k__Bacteria', u'p__Proteobacteria', u'c__Gammaproteobacteria', u'o__Xanthomonadales', u'f__Xanthomonadaceae']
769	New.ReferenceOTU507$$[u'k__Bacteria', u'p__Proteobacteria', u'c__Alphaproteobacteria', u'o__Sphingomonadales', u'f__Erythrobacteraceae']
770	New.ReferenceOTU2054$$[u'k__Bacteria', u'p__Proteobacteria', u'c__Betaproteobacteria', u'o__Burkholderiales', u'f__Comamonadaceae']
771	New.ReferenceOTU2$$[u'k__Bacteria', u'p__Proteobacteria', u'c__Deltaproteobacteria', u'o__Myxococcales', u'f__', u'g__', u's__']
772	New.ReferenceOTU1218$$[u'k__Bacteria', u'p__Chloroflexi', u'c__Chloroflexi', u'o__[Roseiflexales]', u'f__', u'g__', u's__']
773	New.ReferenceOTU1107$$[u'k__Bacteria', u'p__Actinobacteria', u'c__Actinobacteria', u'o__Actinomycetales', u'f__Microbacteriaceae', u'g__Agromyces']
774	New.ReferenceOTU1025$$[u'k__Bacteria', u'p__Bacteroidetes', u'c__[Saprospirae]', u'o__[Saprospirales]', u'f__Chitinophagaceae', u'g__', u's__']
775	New.ReferenceOTU515$$[u'k__Bacteria', u'p__Bacteroidetes', u'c__[Saprospirae]', u'o__[Saprospirales]', u'f__Chitinophagaceae', u'g__', u's__']
776	New.ReferenceOTU2046$$[u'k__Bacteria', u'p__Proteobacteria', u'c__Alphaproteobacteria', u'o__Ellin329', u'f__', u'g__', u's__']
777	New.ReferenceOTU37$$[u'k__Bacteria', u'p__Proteobacteria', u'c__Deltaproteobacteria', u'o__Myxococcales']
778	New.ReferenceOTU32$$[u'k__Bacteria', u'p__Proteobacteria', u'c__Deltaproteobacteria', u'o__Myxococcales', u'f__', u'g__', u's__']
779	New.ReferenceOTU1164$$[u'k__Bacteria', u'p__Proteobacteria', u'c__Deltaproteobacteria', u'o__Myxococcales', u'f__', u'g__', u's__']
780	New.ReferenceOTU1382$$[u'k__Bacteria', u'p__Proteobacteria', u'c__Deltaproteobacteria', u'o__Myxococcales']
781	New.ReferenceOTU357$$[u'k__Bacteria', u'p__Planctomycetes', u'c__Phycisphaerae', u'o__WD2101', u'f__', u'g__', u's__']
782	New.ReferenceOTU2151$$[u'k__Bacteria', u'p__Proteobacteria', u'c__Alphaproteobacteria']
783	New.ReferenceOTU1842$$[u'k__Bacteria', u'p__Proteobacteria', u'c__Gammaproteobacteria']
784	New.ReferenceOTU1021$$[u'k__Bacteria', u'p__Proteobacteria', u'c__Alphaproteobacteria', u'o__Rhodobacterales', u'f__Hyphomonadaceae', u'g__', u's__']
785	New.ReferenceOTU1445$$[u'k__Bacteria', u'p__Proteobacteria', u'c__Alphaproteobacteria', u'o__Rhizobiales', u'f__', u'g__', u's__']
786	New.ReferenceOTU2549$$[u'k__Bacteria', u'p__Acidobacteria', u'c__Acidobacteria-6', u'o__CCU21', u'f__', u'g__', u's__']
787	New.ReferenceOTU2762$$[u'k__Bacteria', u'p__Actinobacteria', u'c__Actinobacteria', u'o__Actinomycetales', u'f__Micromonosporaceae', u'g__Actinoplanes', u's__']
788	New.ReferenceOTU1854$$[u'k__Bacteria', u'p__Verrucomicrobia', u'c__[Spartobacteria]', u'o__[Chthoniobacterales]', u'f__[Chthoniobacteraceae]', u'g__', u's__']
789	New.ReferenceOTU1637$$[u'k__Bacteria', u'p__Verrucomicrobia', u'c__Opitutae', u'o__Opitutales', u'f__Opitutaceae', u'g__Opitutus', u's__']
790	New.ReferenceOTU1143$$[u'k__Bacteria', u'p__Proteobacteria', u'c__Betaproteobacteria', u'o__Ellin6067', u'f__', u'g__', u's__']
791	New.ReferenceOTU1147$$[u'k__Bacteria', u'p__Proteobacteria', u'c__Alphaproteobacteria', u'o__Rhodospirillales', u'f__Rhodospirillaceae', u'g__', u's__']
792	New.ReferenceOTU1522$$[u'k__Bacteria', u'p__Proteobacteria', u'c__Alphaproteobacteria', u'o__Rhodospirillales', u'f__Rhodospirillaceae']
793	New.ReferenceOTU2702$$[u'k__Bacteria', u'p__Proteobacteria', u'c__Gammaproteobacteria', u'o__Xanthomonadales', u'f__Xanthomonadaceae']
794	New.ReferenceOTU2775$$[u'k__Bacteria', u'p__Proteobacteria', u'c__Betaproteobacteria', u'o__Ellin6067', u'f__', u'g__', u's__']
795	New.ReferenceOTU1867$$[u'k__Bacteria', u'p__Proteobacteria', u'c__Alphaproteobacteria', u'o__Sphingomonadales', u'f__Sphingomonadaceae', u'g__Sphingopyxis', u's__alaskensis']
796	New.ReferenceOTU1863$$[u'k__Bacteria', u'p__Acidobacteria', u'c__Acidobacteria-6', u'o__CCU21', u'f__', u'g__', u's__']
797	New.ReferenceOTU1513$$[u'k__Bacteria', u'p__Bacteroidetes', u'c__Cytophagia', u'o__Cytophagales', u'f__Cytophagaceae', u'g__', u's__']
798	New.ReferenceOTU472$$[u'k__Bacteria', u'p__Verrucomicrobia', u'c__Verrucomicrobiae', u'o__Verrucomicrobiales', u'f__Verrucomicrobiaceae', u'g__Luteolibacter', u's__']
799	New.ReferenceOTU900$$[u'k__Bacteria', u'p__Acidobacteria', u'c__Acidobacteria-6', u'o__iii1-15', u'f__', u'g__', u's__']
800	New.ReferenceOTU2344$$[u'k__Bacteria', u'p__Proteobacteria', u'c__Betaproteobacteria', u'o__Burkholderiales', u'f__Comamonadaceae']
801	New.ReferenceOTU488$$[u'k__Bacteria', u'p__Proteobacteria', u'c__Deltaproteobacteria', u'o__Myxococcales', u'f__', u'g__', u's__']
802	New.ReferenceOTU1472$$[u'k__Bacteria', u'p__Actinobacteria', u'c__Actinobacteria', u'o__Actinomycetales', u'f__Streptosporangiaceae', u'g__', u's__']
803	New.ReferenceOTU1184$$[u'k__Bacteria', u'p__Proteobacteria', u'c__Alphaproteobacteria', u'o__Rhizobiales', u'f__Phyllobacteriaceae', u'g__Phyllobacterium', u's__']
804	New.ReferenceOTU2759$$[u'k__Bacteria', u'p__Proteobacteria', u'c__Deltaproteobacteria', u'o__Myxococcales', u'f__', u'g__', u's__']
805	New.CleanUp.ReferenceOTU12511$$[u'k__Bacteria', u'p__Planctomycetes', u'c__Planctomycetia', u'o__Gemmatales', u'f__Gemmataceae', u'g__Gemmata', u's__']
806	New.CleanUp.ReferenceOTU12920$$[u'k__Bacteria', u'p__Proteobacteria', u'c__Alphaproteobacteria', u'o__Sphingomonadales', u'f__Sphingomonadaceae', u'g__Kaistobacter', u's__']
807	New.CleanUp.ReferenceOTU23354$$[u'k__Bacteria', u'p__Acidobacteria', u'c__Acidobacteria-6', u'o__iii1-15', u'f__RB40', u'g__', u's__']
808	New.CleanUp.ReferenceOTU26137$$[u'k__Bacteria', u'p__Proteobacteria', u'c__Gammaproteobacteria', u'o__Xanthomonadales', u'f__Xanthomonadaceae', u'g__', u's__']
809	New.CleanUp.ReferenceOTU27382$$[u'k__Bacteria', u'p__Acidobacteria', u'c__Solibacteres', u'o__Solibacterales', u'f__', u'g__', u's__']
810	New.CleanUp.ReferenceOTU50171$$[u'k__Bacteria', u'p__Proteobacteria', u'c__Betaproteobacteria', u'o__SC-I-84', u'f__', u'g__', u's__']
811	New.CleanUp.ReferenceOTU60279$$[u'k__Bacteria', u'p__Armatimonadetes', u'c__[Fimbriimonadia]', u'o__[Fimbriimonadales]', u'f__[Fimbriimonadaceae]', u'g__Fimbriimonas', u's__']
812	New.CleanUp.ReferenceOTU75895$$[u'k__Bacteria', u'p__WS3', u'c__PRR-12', u'o__Sediment-1', u'f__', u'g__', u's__']
813	New.CleanUp.ReferenceOTU80107$$[u'k__Bacteria', u'p__Proteobacteria', u'c__Alphaproteobacteria', u'o__Sphingomonadales', u'f__Sphingomonadaceae', u'g__Kaistobacter', u's__']
814	New.CleanUp.ReferenceOTU103710$$[u'k__Bacteria', u'p__Actinobacteria', u'c__Actinobacteria', u'o__Actinomycetales', u'f__Micromonosporaceae', u'g__Catellatospora', u's__']
815	New.CleanUp.ReferenceOTU116108$$[u'k__Bacteria', u'p__Actinobacteria', u'c__Acidimicrobiia', u'o__Acidimicrobiales', u'f__C111', u'g__', u's__']
816	New.CleanUp.ReferenceOTU139988$$[u'k__Bacteria', u'p__Proteobacteria', u'c__Betaproteobacteria', u'o__Burkholderiales']
817	New.CleanUp.ReferenceOTU156538$$[u'k__Bacteria', u'p__Actinobacteria', u'c__Actinobacteria', u'o__Actinomycetales', u'f__Micromonosporaceae', u'g__Pilimelia', u's__']
818	New.CleanUp.ReferenceOTU156832$$[u'k__Bacteria', u'p__Acidobacteria', u'c__Solibacteres', u'o__Solibacterales', u'f__', u'g__', u's__']
819	New.CleanUp.ReferenceOTU160500$$[u'k__Bacteria', u'p__Proteobacteria', u'c__Alphaproteobacteria', u'o__Caulobacterales', u'f__Caulobacteraceae', u'g__', u's__']
820	New.CleanUp.ReferenceOTU163324$$[u'k__Bacteria', u'p__Proteobacteria', u'c__Gammaproteobacteria', u'o__Xanthomonadales', u'f__Xanthomonadaceae', u'g__Dokdonella', u's__']
821	New.CleanUp.ReferenceOTU186836$$[u'k__Bacteria', u'p__Verrucomicrobia', u'c__[Pedosphaerae]', u'o__[Pedosphaerales]', u'f__Ellin517', u'g__', u's__']
822	New.CleanUp.ReferenceOTU206068$$[u'k__Bacteria', u'p__Bacteroidetes', u'c__[Saprospirae]', u'o__[Saprospirales]', u'f__Chitinophagaceae', u'g__', u's__']
823	New.CleanUp.ReferenceOTU209921$$[u'k__Bacteria', u'p__Proteobacteria', u'c__Betaproteobacteria', u'o__Burkholderiales', u'f__Comamonadaceae', u'g__Methylibium', u's__']
824	New.CleanUp.ReferenceOTU209964$$[u'k__Bacteria', u'p__Proteobacteria', u'c__Betaproteobacteria', u'o__Burkholderiales', u'f__Comamonadaceae']
825	New.CleanUp.ReferenceOTU210772$$[u'k__Bacteria', u'p__Acidobacteria', u'c__[Chloracidobacteria]', u'o__RB41', u'f__Ellin6075', u'g__', u's__']
826	New.CleanUp.ReferenceOTU210785$$[u'k__Bacteria', u'p__Proteobacteria', u'c__Alphaproteobacteria', u'o__Rhizobiales', u'f__Hyphomicrobiaceae']
827	New.CleanUp.ReferenceOTU211113$$[u'k__Bacteria', u'p__Proteobacteria', u'c__Deltaproteobacteria', u'o__Myxococcales', u'f__', u'g__', u's__']
828	New.CleanUp.ReferenceOTU232473$$[u'k__Bacteria', u'p__Proteobacteria', u'c__Betaproteobacteria', u'o__', u'f__', u'g__', u's__']
829	New.CleanUp.ReferenceOTU258763$$[u'k__Bacteria', u'p__Proteobacteria', u'c__Betaproteobacteria', u'o__', u'f__', u'g__', u's__']
830	New.CleanUp.ReferenceOTU271849$$[u'k__Bacteria', u'p__Proteobacteria', u'c__Alphaproteobacteria', u'o__Rhodobacterales', u'f__Hyphomonadaceae', u'g__', u's__']
831	New.CleanUp.ReferenceOTU285641$$[u'k__Bacteria', u'p__Chloroflexi', u'c__Anaerolineae', u'o__CFB-26', u'f__', u'g__', u's__']
832	New.CleanUp.ReferenceOTU302089$$[u'k__Bacteria', u'p__Verrucomicrobia', u'c__Verrucomicrobiae', u'o__Verrucomicrobiales', u'f__Verrucomicrobiaceae', u'g__Luteolibacter', u's__']
833	New.CleanUp.ReferenceOTU303845$$[u'k__Bacteria', u'p__Planctomycetes', u'c__Planctomycetia', u'o__Gemmatales', u'f__Gemmataceae', u'g__Gemmata', u's__']
834	New.CleanUp.ReferenceOTU306041$$[u'k__Bacteria', u'p__Proteobacteria', u'c__Deltaproteobacteria', u'o__Myxococcales', u'f__OM27', u'g__', u's__']
835	New.CleanUp.ReferenceOTU306657$$[u'k__Bacteria', u'p__Proteobacteria', u'c__Alphaproteobacteria', u'o__Sphingomonadales']
836	New.CleanUp.ReferenceOTU317300$$[u'k__Bacteria', u'p__Chloroflexi', u'c__Chloroflexi', u'o__[Roseiflexales]', u'f__[Kouleothrixaceae]', u'g__', u's__']
837	New.CleanUp.ReferenceOTU320974$$[u'k__Bacteria', u'p__Proteobacteria', u'c__Alphaproteobacteria', u'o__Rhizobiales', u'f__Phyllobacteriaceae']
838	New.CleanUp.ReferenceOTU332762$$[u'k__Bacteria', u'p__Armatimonadetes', u'c__[Fimbriimonadia]', u'o__[Fimbriimonadales]', u'f__[Fimbriimonadaceae]']
839	New.CleanUp.ReferenceOTU339305$$[u'k__Bacteria', u'p__Verrucomicrobia', u'c__[Pedosphaerae]', u'o__[Pedosphaerales]', u'f__', u'g__', u's__']
840	New.CleanUp.ReferenceOTU341494$$[u'k__Bacteria', u'p__Bacteroidetes', u'c__[Saprospirae]', u'o__[Saprospirales]', u'f__Chitinophagaceae', u'g__', u's__']
841	New.CleanUp.ReferenceOTU346650$$[u'k__Bacteria', u'p__Bacteroidetes', u'c__Sphingobacteriia', u'o__Sphingobacteriales', u'f__', u'g__', u's__']
842	New.CleanUp.ReferenceOTU359946$$[u'k__Bacteria', u'p__Proteobacteria', u'c__Alphaproteobacteria', u'o__Rhodospirillales', u'f__Rhodospirillaceae', u'g__', u's__']
843	New.CleanUp.ReferenceOTU366887$$[u'k__Bacteria', u'p__Proteobacteria', u'c__Alphaproteobacteria', u'o__Rhizobiales', u'f__', u'g__', u's__']
844	New.CleanUp.ReferenceOTU373287$$[u'k__Bacteria', u'p__Bacteroidetes', u'c__[Saprospirae]', u'o__[Saprospirales]', u'f__Chitinophagaceae', u'g__Niastella', u's__']
845	New.CleanUp.ReferenceOTU389614$$[u'k__Bacteria', u'p__Proteobacteria', u'c__Alphaproteobacteria', u'o__Rhodospirillales', u'f__Rhodospirillaceae', u'g__', u's__']
846	New.CleanUp.ReferenceOTU392429$$[u'k__Bacteria', u'p__Proteobacteria', u'c__Betaproteobacteria', u'o__SC-I-84', u'f__', u'g__', u's__']
847	New.CleanUp.ReferenceOTU396691$$[u'k__Bacteria', u'p__Bacteroidetes', u'c__Flavobacteriia', u'o__Flavobacteriales', u'f__Cryomorphaceae', u'g__', u's__']
848	New.CleanUp.ReferenceOTU397805$$[u'k__Bacteria', u'p__Proteobacteria', u'c__Gammaproteobacteria', u'o__Xanthomonadales', u'f__Xanthomonadaceae', u'g__', u's__']
849	New.CleanUp.ReferenceOTU408257$$[u'k__Bacteria', u'p__Proteobacteria', u'c__Gammaproteobacteria', u'o__Xanthomonadales', u'f__Sinobacteraceae', u'g__', u's__']
850	New.CleanUp.ReferenceOTU411869$$[u'k__Bacteria', u'p__Proteobacteria', u'c__Deltaproteobacteria', u'o__Myxococcales', u'f__', u'g__', u's__']
851	New.CleanUp.ReferenceOTU424494$$[u'k__Bacteria', u'p__Chloroflexi', u'c__Thermomicrobia', u'o__JG30-KF-CM45', u'f__', u'g__', u's__']
852	New.CleanUp.ReferenceOTU431600$$[u'k__Bacteria', u'p__Proteobacteria', u'c__Betaproteobacteria', u'o__Burkholderiales', u'f__Comamonadaceae', u'g__Leptothrix', u's__']
853	New.CleanUp.ReferenceOTU444450$$[u'k__Bacteria', u'p__Proteobacteria', u'c__Deltaproteobacteria', u'o__Myxococcales']
854	New.CleanUp.ReferenceOTU456104$$[u'k__Bacteria', u'p__Bacteroidetes', u'c__[Saprospirae]', u'o__[Saprospirales]', u'f__Chitinophagaceae', u'g__', u's__']
855	New.CleanUp.ReferenceOTU462563$$[u'k__Bacteria', u'p__Bacteroidetes', u'c__Cytophagia', u'o__Cytophagales', u'f__Cytophagaceae', u'g__', u's__']
856	New.CleanUp.ReferenceOTU480137$$[u'k__Bacteria', u'p__Proteobacteria', u'c__Betaproteobacteria', u'o__Burkholderiales', u'f__Comamonadaceae', u'g__Rubrivivax', u's__']
857	New.CleanUp.ReferenceOTU489180$$[u'k__Bacteria', u'p__Proteobacteria', u'c__Deltaproteobacteria', u'o__Myxococcales']
858	New.CleanUp.ReferenceOTU498334$$[u'k__Bacteria', u'p__Chloroflexi', u'c__Anaerolineae', u'o__envOPS12', u'f__', u'g__', u's__']
859	New.CleanUp.ReferenceOTU499585$$[u'k__Bacteria', u'p__Proteobacteria', u'c__Gammaproteobacteria', u'o__Xanthomonadales', u'f__Xanthomonadaceae', u'g__', u's__']
860	New.CleanUp.ReferenceOTU513298$$[u'k__Bacteria', u'p__TM7', u'c__TM7-1', u'o__', u'f__', u'g__', u's__']
861	New.CleanUp.ReferenceOTU515835$$[u'k__Bacteria', u'p__Proteobacteria', u'c__Alphaproteobacteria', u'o__Caulobacterales', u'f__Caulobacteraceae', u'g__Phenylobacterium', u's__']
862	New.CleanUp.ReferenceOTU520670$$[u'k__Bacteria', u'p__Proteobacteria', u'c__Gammaproteobacteria', u'o__Xanthomonadales', u'f__Sinobacteraceae', u'g__', u's__']
863	New.CleanUp.ReferenceOTU530826$$[u'k__Bacteria', u'p__Proteobacteria', u'c__Alphaproteobacteria', u'o__Rhizobiales']
864	New.CleanUp.ReferenceOTU537467$$[u'k__Bacteria', u'p__Acidobacteria', u'c__Acidobacteria-6', u'o__iii1-15', u'f__', u'g__', u's__']
865	New.CleanUp.ReferenceOTU537652$$[u'k__Bacteria', u'p__Chloroflexi', u'c__Anaerolineae', u'o__SBR1031', u'f__A4b', u'g__', u's__']
866	New.CleanUp.ReferenceOTU550713$$[u'k__Bacteria', u'p__Proteobacteria', u'c__Betaproteobacteria', u'o__SC-I-84', u'f__', u'g__', u's__']
867	New.CleanUp.ReferenceOTU570446$$[u'k__Bacteria', u'p__Proteobacteria', u'c__Gammaproteobacteria', u'o__Xanthomonadales', u'f__Xanthomonadaceae']
868	New.CleanUp.ReferenceOTU581564$$[u'k__Bacteria', u'p__Acidobacteria', u'c__Sva0725', u'o__Sva0725', u'f__', u'g__', u's__']
869	New.CleanUp.ReferenceOTU588619$$[u'k__Bacteria', u'p__Bacteroidetes', u'c__[Saprospirae]', u'o__[Saprospirales]', u'f__Chitinophagaceae', u'g__Flavisolibacter', u's__']
870	New.CleanUp.ReferenceOTU598750$$[u'k__Bacteria', u'p__Proteobacteria', u'c__Betaproteobacteria', u'o__Burkholderiales']
871	New.CleanUp.ReferenceOTU631918$$[u'k__Bacteria', u'p__Actinobacteria', u'c__Acidimicrobiia', u'o__Acidimicrobiales', u'f__', u'g__', u's__']
872	New.CleanUp.ReferenceOTU639674$$[u'k__Bacteria', u'p__Planctomycetes', u'c__Planctomycetia', u'o__Planctomycetales', u'f__Planctomycetaceae', u'g__Planctomyces', u's__']
873	New.CleanUp.ReferenceOTU640082$$[u'k__Bacteria', u'p__Planctomycetes', u'c__Planctomycetia', u'o__Planctomycetales', u'f__Planctomycetaceae', u'g__Planctomyces', u's__']
874	New.CleanUp.ReferenceOTU640726$$[u'k__Bacteria', u'p__Actinobacteria', u'c__Thermoleophilia', u'o__Solirubrobacterales', u'f__', u'g__', u's__']
875	New.CleanUp.ReferenceOTU643780$$[u'k__Bacteria', u'p__Proteobacteria', u'c__Alphaproteobacteria', u'o__Sphingomonadales', u'f__Erythrobacteraceae', u'g__', u's__']
876	New.CleanUp.ReferenceOTU664957$$[u'k__Bacteria', u'p__Proteobacteria', u'c__Betaproteobacteria', u'o__Burkholderiales', u'f__Oxalobacteraceae']
877	New.CleanUp.ReferenceOTU681226$$[u'k__Bacteria', u'p__Proteobacteria', u'c__Deltaproteobacteria', u'o__Spirobacillales', u'f__', u'g__', u's__']
878	New.CleanUp.ReferenceOTU681931$$[u'k__Bacteria', u'p__Bacteroidetes', u'c__[Saprospirae]', u'o__[Saprospirales]', u'f__Chitinophagaceae']
879	New.CleanUp.ReferenceOTU714533$$[u'k__Bacteria', u'p__Bacteroidetes', u'c__[Saprospirae]', u'o__[Saprospirales]', u'f__Chitinophagaceae', u'g__', u's__']
880	New.CleanUp.ReferenceOTU724801$$[u'k__Bacteria', u'p__Proteobacteria', u'c__Betaproteobacteria', u'o__SC-I-84', u'f__', u'g__', u's__']
881	513586$$[u'k__Bacteria', u'p__Planctomycetes', u'c__Phycisphaerae', u'o__WD2101', u'f__', u'g__', u's__']
882	207866$$[u'k__Bacteria', u'p__Proteobacteria', u'c__Alphaproteobacteria', u'o__Rhizobiales', u'f__Hyphomicrobiaceae', u'g__Pedomicrobium', u's__']
883	978498$$[u'k__Bacteria', u'p__Proteobacteria', u'c__Deltaproteobacteria', u'o__Myxococcales', u'f__', u'g__', u's__']
884	4405640$$[u'k__Bacteria', u'p__Verrucomicrobia', u'c__[Pedosphaerae]', u'o__[Pedosphaerales]', u'f__Ellin517', u'g__', u's__']
885	818509$$[u'k__Bacteria', u'p__Proteobacteria', u'c__Betaproteobacteria', u'o__Burkholderiales', u'f__Comamonadaceae']
886	1117094$$[u'k__Bacteria', u'p__Bacteroidetes', u'c__[Saprospirae]', u'o__[Saprospirales]', u'f__Chitinophagaceae']
887	555571$$[u'k__Bacteria', u'p__Planctomycetes', u'c__Phycisphaerae', u'o__WD2101', u'f__', u'g__', u's__']
888	4401333$$[u'k__Bacteria', u'p__Proteobacteria', u'c__Deltaproteobacteria', u'o__Myxococcales', u'f__Haliangiaceae', u'g__', u's__']
889	93175$$[u'k__Bacteria', u'p__Actinobacteria', u'c__Acidimicrobiia', u'o__Acidimicrobiales', u'f__Iamiaceae', u'g__Iamia', u's__']
890	4416927$$[u'k__Bacteria', u'p__Proteobacteria', u'c__Alphaproteobacteria', u'o__Rhizobiales', u'f__Bradyrhizobiaceae', u'g__Balneimonas', u's__']
891	4342107$$[u'k__Bacteria', u'p__Proteobacteria', u'c__Alphaproteobacteria', u'o__Rhizobiales', u'f__Hyphomicrobiaceae', u'g__Rhodoplanes', u's__']
892	257322$$[u'k__Bacteria', u'p__Actinobacteria', u'c__Acidimicrobiia', u'o__Acidimicrobiales']
893	252012$$[u'k__Bacteria', u'p__Proteobacteria', u'c__Gammaproteobacteria', u'o__Xanthomonadales', u'f__Sinobacteraceae', u'g__', u's__']
894	1744843$$[u'k__Bacteria', u'p__Actinobacteria', u'c__Acidimicrobiia', u'o__Acidimicrobiales']
895	3259009$$[u'k__Bacteria', u'p__Proteobacteria', u'c__Alphaproteobacteria', u'o__Sphingomonadales', u'f__Sphingomonadaceae', u'g__Novosphingobium', u's__']
896	279355$$[u'k__Bacteria', u'p__Planctomycetes', u'c__Planctomycetia', u'o__Gemmatales', u'f__Gemmataceae', u'g__', u's__']
897	3501894$$[u'k__Bacteria', u'p__Acidobacteria', u'c__Sva0725', u'o__Sva0725', u'f__', u'g__', u's__']
898	1106796$$[u'k__Bacteria', u'p__Bacteroidetes', u'c__Cytophagia', u'o__Cytophagales', u'f__Cytophagaceae', u'g__', u's__']
899	849118$$[u'k__Bacteria', u'p__Proteobacteria', u'c__Alphaproteobacteria', u'o__Rhizobiales', u'f__Hyphomicrobiaceae', u'g__Devosia', u's__']
900	357011$$[u'k__Bacteria', u'p__Proteobacteria', u'c__Alphaproteobacteria', u'o__Rhodospirillales', u'f__Rhodospirillaceae', u'g__', u's__']
901	913399$$[u'k__Bacteria', u'p__Bacteroidetes', u'c__BME43', u'o__', u'f__', u'g__', u's__']
902	681987$$[u'k__Bacteria', u'p__Proteobacteria', u'c__Alphaproteobacteria', u'o__Rhizobiales', u'f__Bradyrhizobiaceae', u'g__Balneimonas', u's__']
903	553557$$[u'k__Bacteria', u'p__Proteobacteria', u'c__Gammaproteobacteria', u'o__Xanthomonadales', u'f__Xanthomonadaceae', u'g__Dokdonella', u's__']
904	545247$$[u'k__Bacteria', u'p__Proteobacteria', u'c__Alphaproteobacteria', u'o__Rhizobiales', u'f__Hyphomicrobiaceae', u'g__Rhodoplanes', u's__']
905	778968$$[u'k__Bacteria', u'p__Actinobacteria', u'c__Actinobacteria', u'o__Actinomycetales', u'f__Nocardioidaceae', u'g__', u's__']
906	250206$$[u'k__Bacteria', u'p__Proteobacteria', u'c__Alphaproteobacteria', u'o__Rhizobiales', u'f__Rhizobiaceae', u'g__Agrobacterium', u's__']
907	4411327$$[u'k__Bacteria', u'p__Acidobacteria', u'c__Acidobacteria-6', u'o__iii1-15', u'f__', u'g__', u's__']
908	113347$$[u'k__Bacteria', u'p__Acidobacteria', u'c__[Chloracidobacteria]', u'o__RB41', u'f__Ellin6075', u'g__', u's__']
909	93726$$[u'k__Bacteria', u'p__Proteobacteria', u'c__Betaproteobacteria', u'o__Burkholderiales', u'f__Comamonadaceae', u'g__Hydrogenophaga', u's__']
910	821266$$[u'k__Bacteria', u'p__Planctomycetes', u'c__Phycisphaerae', u'o__Phycisphaerales', u'f__', u'g__', u's__']
911	347428$$[u'k__Bacteria', u'p__Proteobacteria', u'c__Alphaproteobacteria', u'o__Rhizobiales', u'f__Hyphomicrobiaceae', u'g__Devosia', u's__']
912	4310308$$[u'k__Bacteria', u'p__Proteobacteria', u'c__Alphaproteobacteria', u'o__Rhizobiales']
913	4401164$$[u'k__Bacteria', u'p__Chloroflexi', u'c__S085', u'o__', u'f__', u'g__', u's__']
914	206106$$[u'k__Bacteria', u'p__Proteobacteria', u'c__Alphaproteobacteria', u'o__Rhizobiales', u'f__', u'g__', u's__']
915	3085831$$[u'k__Bacteria', u'p__Proteobacteria', u'c__Alphaproteobacteria', u'o__Sphingomonadales', u'f__Erythrobacteraceae']
916	3627262$$[u'k__Bacteria', u'p__Acidobacteria', u'c__Acidobacteria-6', u'o__CCU21', u'f__', u'g__', u's__']
917	4348899$$[u'k__Bacteria', u'p__Verrucomicrobia', u'c__Opitutae', u'o__Opitutales', u'f__Opitutaceae', u'g__Opitutus', u's__']
918	1546872$$[u'k__Bacteria', u'p__Gemmatimonadetes', u'c__Gemm-1', u'o__', u'f__', u'g__', u's__']
919	4254478$$[u'k__Bacteria', u'p__Proteobacteria', u'c__Betaproteobacteria', u'o__Burkholderiales', u'f__Comamonadaceae']
920	945478$$[u'k__Bacteria', u'p__Proteobacteria', u'c__Gammaproteobacteria', u'o__Xanthomonadales', u'f__Xanthomonadaceae']
921	946179$$[u'k__Bacteria', u'p__Actinobacteria', u'c__MB-A2-108', u'o__0319-7L14', u'f__', u'g__', u's__']
922	2788509$$[u'k__Bacteria', u'p__Proteobacteria', u'c__Deltaproteobacteria', u'o__Myxococcales', u'f__OM27', u'g__', u's__']
923	223655$$[u'k__Bacteria', u'p__Planctomycetes', u'c__Phycisphaerae', u'o__WD2101', u'f__', u'g__', u's__']
924	4476891$$[u'k__Bacteria', u'p__Proteobacteria', u'c__Alphaproteobacteria', u'o__Sphingomonadales', u'f__Erythrobacteraceae', u'g__Lutibacterium', u's__']
925	319502$$[u'k__Bacteria', u'p__Proteobacteria', u'c__Betaproteobacteria', u'o__Rhodocyclales', u'f__Rhodocyclaceae', u'g__Dechloromonas', u's__']
926	1065585$$[u'k__Bacteria', u'p__Armatimonadetes', u'c__[Fimbriimonadia]', u'o__[Fimbriimonadales]', u'f__[Fimbriimonadaceae]']
927	1108431$$[u'k__Bacteria', u'p__Verrucomicrobia', u'c__[Pedosphaerae]', u'o__[Pedosphaerales]', u'f__Ellin515', u'g__', u's__']
928	824783$$[u'k__Bacteria', u'p__Proteobacteria', u'c__Deltaproteobacteria', u'o__Myxococcales', u'f__', u'g__', u's__']
929	107036$$[u'k__Bacteria', u'p__Proteobacteria', u'c__Alphaproteobacteria', u'o__Rhizobiales', u'f__Bradyrhizobiaceae']
930	154804$$[u'k__Bacteria', u'p__Actinobacteria', u'c__Acidimicrobiia', u'o__Acidimicrobiales', u'f__', u'g__', u's__']
931	1148343$$[u'k__Bacteria', u'p__Planctomycetes', u'c__Planctomycetia', u'o__Gemmatales', u'f__Gemmataceae', u'g__Gemmata', u's__']
932	566212$$[u'k__Bacteria', u'p__Proteobacteria', u'c__Alphaproteobacteria', u'o__Rhizobiales', u'f__', u'g__', u's__']
933	549433$$[u'k__Bacteria', u'p__Gemmatimonadetes', u'c__Gemm-1', u'o__', u'f__', u'g__', u's__']
934	336892$$[u'k__Bacteria', u'p__Proteobacteria', u'c__Gammaproteobacteria', u'o__', u'f__', u'g__', u's__']
935	4435098$$[u'k__Bacteria', u'p__Proteobacteria', u'c__Alphaproteobacteria', u'o__Rhizobiales', u'f__Hyphomicrobiaceae', u'g__Pedomicrobium', u's__']
936	208343$$[u'k__Bacteria', u'p__Proteobacteria', u'c__Alphaproteobacteria', u'o__Sphingomonadales', u'f__Sphingomonadaceae', u'g__Sphingomonas']
937	89599$$[u'k__Bacteria', u'p__Proteobacteria', u'c__Deltaproteobacteria', u'o__Syntrophobacterales', u'f__Syntrophobacteraceae', u'g__', u's__']
938	2258522$$[u'k__Bacteria', u'p__Proteobacteria', u'c__Alphaproteobacteria', u'o__Rhizobiales', u'f__Hyphomicrobiaceae', u'g__Rhodoplanes', u's__']
939	1039546$$[u'k__Bacteria', u'p__Actinobacteria', u'c__Acidimicrobiia', u'o__Acidimicrobiales']
940	4437174$$[u'k__Bacteria', u'p__Planctomycetes', u'c__Planctomycetia', u'o__Pirellulales', u'f__Pirellulaceae', u'g__', u's__']
941	198096$$[u'k__Bacteria', u'p__Proteobacteria', u'c__Betaproteobacteria', u'o__Burkholderiales', u'f__Comamonadaceae']
942	83514$$[u'k__Bacteria', u'p__Actinobacteria', u'c__Actinobacteria', u'o__Actinomycetales', u'f__Sporichthyaceae', u'g__', u's__']
943	4350559$$[u'k__Bacteria', u'p__Gemmatimonadetes', u'c__Gemm-1', u'o__', u'f__', u'g__', u's__']
944	112765$$[u'k__Bacteria', u'p__Proteobacteria', u'c__Deltaproteobacteria', u'o__Desulfuromonadales', u'f__Geobacteraceae', u'g__Geobacter', u's__']
945	113373$$[u'k__Bacteria', u'p__Planctomycetes', u'c__Planctomycetia', u'o__Gemmatales', u'f__Isosphaeraceae', u'g__', u's__']
946	2885481$$[u'k__Bacteria', u'p__Chloroflexi', u'c__Chloroflexi', u'o__[Roseiflexales]', u'f__[Kouleothrixaceae]', u'g__', u's__']
947	New.ReferenceOTU2350$$[u'k__Bacteria', u'p__Planctomycetes', u'c__Planctomycetia', u'o__Pirellulales', u'f__Pirellulaceae', u'g__A17', u's__']
948	New.ReferenceOTU2326$$[u'k__Bacteria', u'p__OD1', u'c__ZB2', u'o__', u'f__', u'g__', u's__']
949	New.ReferenceOTU948$$[u'k__Bacteria', u'p__Gemmatimonadetes', u'c__Gemmatimonadetes', u'o__', u'f__', u'g__', u's__']
950	New.ReferenceOTU1278$$[u'k__Bacteria', u'p__Proteobacteria', u'c__Alphaproteobacteria', u'o__BD7-3', u'f__', u'g__', u's__']
951	New.ReferenceOTU1272$$[u'k__Bacteria', u'p__Gemmatimonadetes', u'c__Gemm-1', u'o__', u'f__', u'g__', u's__']
952	New.ReferenceOTU597$$[u'k__Bacteria', u'p__Proteobacteria', u'c__Alphaproteobacteria', u'o__Rhizobiales']
953	New.ReferenceOTU2206$$[u'k__Bacteria', u'p__Proteobacteria', u'c__Alphaproteobacteria', u'o__Rhizobiales']
954	New.ReferenceOTU435$$[u'k__Bacteria', u'p__Actinobacteria', u'c__Acidimicrobiia', u'o__Acidimicrobiales', u'f__EB1017', u'g__', u's__']
955	New.ReferenceOTU1254$$[u'k__Bacteria', u'p__Proteobacteria', u'c__Alphaproteobacteria', u'o__Rhizobiales', u'f__Brucellaceae', u'g__Ochrobactrum']
956	New.ReferenceOTU1917$$[u'k__Bacteria', u'p__Chloroflexi', u'c__Chloroflexi', u'o__[Roseiflexales]', u'f__[Kouleothrixaceae]', u'g__', u's__']
957	New.ReferenceOTU148$$[u'k__Bacteria', u'p__Proteobacteria', u'c__Deltaproteobacteria', u'o__Myxococcales']
958	New.ReferenceOTU2079$$[u'k__Bacteria', u'p__Proteobacteria', u'c__Deltaproteobacteria', u'o__Myxococcales', u'f__Nannocystaceae', u'g__Plesiocystis', u's__']
959	New.ReferenceOTU1904$$[u'k__Bacteria', u'p__Proteobacteria', u'c__Betaproteobacteria', u'o__Rhodocyclales', u'f__Rhodocyclaceae']
960	New.ReferenceOTU1802$$[u'k__Bacteria', u'p__Planctomycetes', u'c__Phycisphaerae', u'o__WD2101', u'f__', u'g__', u's__']
961	New.ReferenceOTU2472$$[u'k__Bacteria', u'p__Proteobacteria', u'c__Deltaproteobacteria', u'o__Myxococcales', u'f__', u'g__', u's__']
962	New.ReferenceOTU980$$[u'k__Bacteria', u'p__Proteobacteria', u'c__Alphaproteobacteria', u'o__Rhodospirillales', u'f__Rhodospirillaceae', u'g__Magnetospirillum', u's__']
963	New.ReferenceOTU1626$$[u'k__Bacteria', u'p__Acidobacteria', u'c__Solibacteres', u'o__Solibacterales', u'f__Solibacteraceae', u'g__Candidatus Solibacter', u's__']
964	New.ReferenceOTU1815$$[u'k__Bacteria', u'p__Proteobacteria', u'c__Alphaproteobacteria', u'o__Caulobacterales', u'f__Caulobacteraceae', u'g__', u's__']
965	New.ReferenceOTU776$$[u'k__Bacteria', u'p__Gemmatimonadetes', u'c__Gemmatimonadetes', u'o__Gemmatimonadales', u'f__Ellin5301', u'g__', u's__']
966	New.ReferenceOTU1109$$[u'k__Bacteria', u'p__Chloroflexi', u'c__Chloroflexi', u'o__[Roseiflexales]', u'f__[Kouleothrixaceae]', u'g__', u's__']
967	New.ReferenceOTU2264$$[u'k__Bacteria', u'p__Proteobacteria', u'c__Betaproteobacteria', u'o__SC-I-84', u'f__', u'g__', u's__']
968	New.ReferenceOTU2609$$[u'k__Bacteria', u'p__Planctomycetes', u'c__C6', u'o__MVS-107', u'f__', u'g__', u's__']
969	New.ReferenceOTU993$$[u'k__Bacteria', u'p__Firmicutes', u'c__Clostridia', u'o__Clostridiales', u'f__Ruminococcaceae']
970	New.ReferenceOTU1772$$[u'k__Bacteria', u'p__Verrucomicrobia', u'c__[Pedosphaerae]', u'o__[Pedosphaerales]', u'f__auto67_4W', u'g__', u's__']
971	New.ReferenceOTU1555$$[u'k__Bacteria', u'p__Proteobacteria', u'c__Betaproteobacteria']
972	New.ReferenceOTU520$$[u'k__Bacteria', u'p__Proteobacteria', u'c__Alphaproteobacteria', u'o__Rhizobiales', u'f__Hyphomicrobiaceae', u'g__Rhodoplanes']
973	New.ReferenceOTU2142$$[u'k__Bacteria', u'p__Chloroflexi', u'c__TK10', u'o__AKYG885', u'f__Dolo_23', u'g__', u's__']
974	New.ReferenceOTU827$$[u'k__Bacteria', u'p__Acidobacteria', u'c__Acidobacteria-6', u'o__iii1-15', u'f__', u'g__', u's__']
975	New.ReferenceOTU2432$$[u'k__Bacteria', u'p__Proteobacteria', u'c__Alphaproteobacteria', u'o__BD7-3', u'f__', u'g__', u's__']
976	New.ReferenceOTU786$$[u'k__Bacteria', u'p__Proteobacteria', u'c__Alphaproteobacteria', u'o__Rhizobiales', u'f__Bradyrhizobiaceae']
977	New.ReferenceOTU814$$[u'k__Bacteria', u'p__Actinobacteria', u'c__Thermoleophilia', u'o__Solirubrobacterales', u'f__', u'g__', u's__']
978	New.ReferenceOTU117$$[u'k__Bacteria', u'p__Chloroflexi', u'c__Thermomicrobia', u'o__JG30-KF-CM45', u'f__', u'g__', u's__']
979	New.ReferenceOTU905$$[u'k__Bacteria', u'p__Actinobacteria', u'c__Thermoleophilia', u'o__Solirubrobacterales', u'f__Solirubrobacteraceae']
980	New.ReferenceOTU1050$$[u'k__Bacteria', u'p__Actinobacteria', u'c__Actinobacteria', u'o__Actinomycetales', u'f__Intrasporangiaceae', u'g__Oryzihumus', u's__leptocrescens']
981	New.CleanUp.ReferenceOTU1601$$[u'k__Bacteria', u'p__Proteobacteria', u'c__Gammaproteobacteria', u'o__Xanthomonadales', u'f__Xanthomonadaceae']
982	New.CleanUp.ReferenceOTU7605$$[u'k__Bacteria', u'p__Verrucomicrobia', u'c__Opitutae', u'o__Opitutales', u'f__Opitutaceae', u'g__Opitutus', u's__']
983	New.CleanUp.ReferenceOTU15882$$[u'k__Bacteria', u'p__Proteobacteria', u'c__Betaproteobacteria', u'o__Burkholderiales', u'f__Comamonadaceae']
984	New.CleanUp.ReferenceOTU17726$$[u'k__Bacteria', u'p__Proteobacteria', u'c__Deltaproteobacteria', u'o__Myxococcales']
985	New.CleanUp.ReferenceOTU60943$$[u'k__Bacteria', u'p__Verrucomicrobia', u'c__[Pedosphaerae]', u'o__[Pedosphaerales]', u'f__', u'g__', u's__']
986	New.CleanUp.ReferenceOTU71185$$[u'k__Bacteria', u'p__Proteobacteria', u'c__Gammaproteobacteria', u'o__Xanthomonadales', u'f__Sinobacteraceae', u'g__Steroidobacter', u's__']
987	New.CleanUp.ReferenceOTU95732$$[u'k__Bacteria', u'p__OD1', u'c__ZB2', u'o__', u'f__', u'g__', u's__']
988	New.CleanUp.ReferenceOTU103625$$[u'k__Bacteria', u'p__Acidobacteria', u'c__Acidobacteria-6', u'o__iii1-15', u'f__', u'g__', u's__']
989	New.CleanUp.ReferenceOTU135880$$[u'k__Bacteria', u'p__Actinobacteria', u'c__Actinobacteria', u'o__Actinomycetales', u'f__Streptomycetaceae', u'g__', u's__']
990	New.CleanUp.ReferenceOTU152775$$[u'k__Bacteria', u'p__Acidobacteria', u'c__Acidobacteria-6', u'o__iii1-15', u'f__RB40', u'g__', u's__']
991	New.CleanUp.ReferenceOTU167070$$[u'k__Bacteria', u'p__Proteobacteria', u'c__Betaproteobacteria', u'o__Burkholderiales', u'f__Comamonadaceae', u'g__Hydrogenophaga', u's__']
992	New.CleanUp.ReferenceOTU186944$$[u'k__Bacteria', u'p__Planctomycetes', u'c__Planctomycetia', u'o__Pirellulales', u'f__Pirellulaceae']
993	New.CleanUp.ReferenceOTU202804$$[u'k__Bacteria', u'p__Planctomycetes', u'c__Planctomycetia', u'o__Pirellulales', u'f__Pirellulaceae', u'g__Pirellula', u's__']
994	New.CleanUp.ReferenceOTU220412$$[u'k__Bacteria', u'p__Gemmatimonadetes', u'c__Gemmatimonadetes', u'o__Gemmatimonadales', u'f__Gemmatimonadaceae', u'g__Gemmatimonas', u's__']
995	New.CleanUp.ReferenceOTU224521$$[u'k__Bacteria', u'p__Verrucomicrobia', u'c__[Pedosphaerae]', u'o__[Pedosphaerales]', u'f__', u'g__', u's__']
996	New.CleanUp.ReferenceOTU270061$$[u'k__Bacteria', u'p__Acidobacteria', u'c__Solibacteres', u'o__Solibacterales', u'f__', u'g__', u's__']
997	New.CleanUp.ReferenceOTU281739$$[u'k__Bacteria', u'p__Planctomycetes', u'c__Planctomycetia', u'o__Planctomycetales', u'f__Planctomycetaceae', u'g__Planctomyces', u's__']
998	New.CleanUp.ReferenceOTU328520$$[u'k__Bacteria', u'p__Proteobacteria', u'c__Alphaproteobacteria', u'o__Rhodobacterales', u'f__Hyphomonadaceae', u'g__', u's__']
999	New.CleanUp.ReferenceOTU333583$$[u'k__Bacteria', u'p__Gemmatimonadetes', u'c__Gemmatimonadetes', u'o__Ellin5290', u'f__', u'g__', u's__']
1000	New.CleanUp.ReferenceOTU335737$$[u'k__Bacteria', u'p__Proteobacteria', u'c__Alphaproteobacteria', u'o__Rhizobiales']
1001	New.CleanUp.ReferenceOTU344921$$[u'k__Bacteria', u'p__Proteobacteria', u'c__Betaproteobacteria', u'o__Burkholderiales', u'f__Comamonadaceae', u'g__Azohydromonas', u's__']
1002	New.CleanUp.ReferenceOTU400244$$[u'k__Bacteria', u'p__Proteobacteria', u'c__Betaproteobacteria', u'o__Ellin6067', u'f__', u'g__', u's__']
1003	New.CleanUp.ReferenceOTU403895$$[u'k__Bacteria', u'p__Proteobacteria', u'c__Alphaproteobacteria', u'o__Rhizobiales']
1004	New.CleanUp.ReferenceOTU404997$$[u'k__Bacteria', u'p__OD1', u'c__ZB2', u'o__', u'f__', u'g__', u's__']
1005	New.CleanUp.ReferenceOTU419955$$[u'k__Bacteria', u'p__Planctomycetes', u'c__Planctomycetia', u'o__Gemmatales', u'f__Gemmataceae', u'g__Gemmata', u's__']
1006	New.CleanUp.ReferenceOTU420094$$[u'k__Bacteria', u'p__Planctomycetes', u'c__Planctomycetia', u'o__Pirellulales', u'f__Pirellulaceae', u'g__A17', u's__']
1007	New.CleanUp.ReferenceOTU432781$$[u'k__Bacteria', u'p__Actinobacteria', u'c__MB-A2-108', u'o__0319-7L14', u'f__', u'g__', u's__']
1008	New.CleanUp.ReferenceOTU436455$$[u'k__Bacteria', u'p__Proteobacteria', u'c__Deltaproteobacteria', u'o__Myxococcales', u'f__', u'g__', u's__']
1009	New.CleanUp.ReferenceOTU443243$$[u'k__Bacteria', u'p__Proteobacteria', u'c__Betaproteobacteria', u'o__Burkholderiales', u'f__Comamonadaceae', u'g__Polaromonas', u's__']
1010	New.CleanUp.ReferenceOTU443717$$[u'k__Bacteria', u'p__Chloroflexi', u'c__Thermomicrobia', u'o__JG30-KF-CM45', u'f__', u'g__', u's__']
1011	New.CleanUp.ReferenceOTU448040$$[u'k__Bacteria', u'p__Proteobacteria', u'c__Deltaproteobacteria', u'o__Myxococcales', u'f__Haliangiaceae', u'g__', u's__']
1012	New.CleanUp.ReferenceOTU472173$$[u'k__Bacteria', u'p__Proteobacteria', u'c__Alphaproteobacteria', u'o__Rhizobiales', u'f__', u'g__', u's__']
1013	New.CleanUp.ReferenceOTU486147$$[u'k__Bacteria', u'p__Proteobacteria', u'c__Betaproteobacteria', u'o__Rhodocyclales', u'f__Rhodocyclaceae']
1014	New.CleanUp.ReferenceOTU518613$$[u'k__Bacteria', u'p__Acidobacteria', u'c__Acidobacteria-6', u'o__CCU21', u'f__', u'g__', u's__']
1015	New.CleanUp.ReferenceOTU532891$$[u'k__Bacteria', u'p__Proteobacteria', u'c__Deltaproteobacteria', u'o__NB1-j', u'f__JTB38', u'g__', u's__']
1016	New.CleanUp.ReferenceOTU535577$$[u'k__Bacteria', u'p__Bacteroidetes', u'c__Flavobacteriia', u'o__Flavobacteriales', u'f__Cryomorphaceae', u'g__', u's__']
1017	New.CleanUp.ReferenceOTU553024$$[u'k__Bacteria', u'p__Proteobacteria', u'c__Alphaproteobacteria', u'o__Rhodospirillales', u'f__', u'g__', u's__']
1018	New.CleanUp.ReferenceOTU559410$$[u'k__Bacteria', u'p__Proteobacteria', u'c__Alphaproteobacteria', u'o__Rhodospirillales', u'f__Acetobacteraceae', u'g__', u's__']
1019	New.CleanUp.ReferenceOTU568604$$[u'k__Bacteria', u'p__Verrucomicrobia', u'c__[Spartobacteria]', u'o__[Chthoniobacterales]', u'f__[Chthoniobacteraceae]', u'g__Candidatus Xiphinematobacter', u's__']
1020	New.CleanUp.ReferenceOTU572577$$[u'k__Bacteria', u'p__Acidobacteria', u'c__iii1-8', u'o__DS-18', u'f__', u'g__', u's__']
1021	New.CleanUp.ReferenceOTU604706$$[u'k__Bacteria', u'p__Actinobacteria', u'c__Actinobacteria', u'o__Actinomycetales', u'f__Microbacteriaceae', u'g__Agromyces', u's__']
1022	New.CleanUp.ReferenceOTU654019$$[u'k__Bacteria', u'p__Proteobacteria', u'c__Alphaproteobacteria', u'o__Rhizobiales', u'f__Xanthobacteraceae', u'g__Labrys', u's__']
1023	New.CleanUp.ReferenceOTU681162$$[u'k__Bacteria', u'p__Chloroflexi', u'c__Ellin6529', u'o__', u'f__', u'g__', u's__']
1024	New.CleanUp.ReferenceOTU683679$$[u'k__Bacteria', u'p__Acidobacteria', u'c__Solibacteres', u'o__Solibacterales', u'f__', u'g__', u's__']
1025	New.CleanUp.ReferenceOTU687585$$[u'k__Bacteria', u'p__Gemmatimonadetes', u'c__Gemm-1', u'o__', u'f__', u'g__', u's__']
1026	New.CleanUp.ReferenceOTU706677$$[u'k__Bacteria', u'p__Proteobacteria', u'c__Alphaproteobacteria', u'o__Rhodospirillales', u'f__Acetobacteraceae', u'g__', u's__']
1027	New.CleanUp.ReferenceOTU714768$$[u'k__Bacteria', u'p__Planctomycetes', u'c__028H05-P-BN-P5', u'o__', u'f__', u'g__', u's__']
1028	New.CleanUp.ReferenceOTU716726$$[u'k__Bacteria', u'p__Acidobacteria', u'c__iii1-8', u'o__DS-18', u'f__', u'g__', u's__']
1029	New.CleanUp.ReferenceOTU717398$$[u'k__Bacteria', u'p__Proteobacteria', u'c__Betaproteobacteria', u'o__Burkholderiales', u'f__Comamonadaceae', u'g__Rhodoferax', u's__']
1030	New.CleanUp.ReferenceOTU726458$$[u'k__Bacteria', u'p__Chloroflexi', u'c__Ellin6529', u'o__', u'f__', u'g__', u's__']
1031	New.CleanUp.ReferenceOTU727323$$[u'k__Bacteria', u'p__Gemmatimonadetes', u'c__Gemm-1', u'o__', u'f__', u'g__', u's__']
1032	New.CleanUp.ReferenceOTU752546$$[u'k__Bacteria', u'p__Actinobacteria', u'c__Actinobacteria', u'o__Actinomycetales', u'f__Streptomycetaceae']

## Sheet: Root_DNA Exploit
	x
1	207283$$[u'k__Bacteria', u'p__Actinobacteria', u'c__Thermoleophilia', u'o__Solirubrobacterales', u'f__', u'g__', u's__']
2	1105085$$[u'k__Bacteria', u'p__Proteobacteria', u'c__Alphaproteobacteria', u'o__Caulobacterales', u'f__Caulobacteraceae', u'g__Asticcacaulis', u's__biprosthecium']
3	1125832$$[u'k__Bacteria', u'p__Proteobacteria', u'c__Alphaproteobacteria', u'o__Sphingomonadales', u'f__Sphingomonadaceae', u'g__Sphingobium', u's__']
4	4402114$$[u'k__Bacteria', u'p__Proteobacteria', u'c__Betaproteobacteria', u'o__Rhodocyclales', u'f__Rhodocyclaceae', u'g__Zoogloea', u's__']
5	821570$$[u'k__Bacteria', u'p__Gemmatimonadetes', u'c__Gemm-1', u'o__', u'f__', u'g__', u's__']
6	4337815$$[u'k__Bacteria', u'p__Firmicutes', u'c__Clostridia', u'o__Clostridiales', u'f__Clostridiaceae', u'g__Clostridium']
7	513073$$[u'k__Bacteria', u'p__Proteobacteria', u'c__Alphaproteobacteria', u'o__Rhizobiales', u'f__Hyphomicrobiaceae', u'g__Hyphomicrobium', u's__']
8	4294451$$[u'k__Bacteria', u'p__Proteobacteria', u'c__Deltaproteobacteria', u'o__Desulfuromonadales', u'f__Geobacteraceae', u'g__Geobacter', u's__']
9	1024056$$[u'k__Bacteria', u'p__Proteobacteria', u'c__Alphaproteobacteria', u'o__Rhodospirillales', u'f__Rhodospirillaceae', u'g__', u's__']
10	873887$$[u'k__Bacteria', u'p__Actinobacteria', u'c__Thermoleophilia', u'o__Solirubrobacterales', u'f__Solirubrobacteraceae', u'g__', u's__']
11	531358$$[u'k__Bacteria', u'p__OD1', u'c__ZB2', u'o__', u'f__', u'g__', u's__']
12	564004$$[u'k__Bacteria', u'p__Proteobacteria', u'c__Alphaproteobacteria', u'o__Rhodospirillales', u'f__Rhodospirillaceae', u'g__', u's__']
13	4369797$$[u'k__Bacteria', u'p__Firmicutes', u'c__Clostridia', u'o__Clostridiales', u'f__Lachnospiraceae']
14	1066569$$[u'k__Bacteria', u'p__Acidobacteria', u'c__Sva0725', u'o__Sva0725', u'f__', u'g__', u's__']
15	131337$$[u'k__Bacteria', u'p__Proteobacteria', u'c__Gammaproteobacteria', u'o__Xanthomonadales', u'f__Sinobacteraceae', u'g__', u's__']
16	716519$$[u'k__Bacteria', u'p__OD1', u'c__ZB2', u'o__', u'f__', u'g__', u's__']
17	154102$$[u'k__Bacteria', u'p__Verrucomicrobia', u'c__[Spartobacteria]', u'o__[Chthoniobacterales]', u'f__[Chthoniobacteraceae]', u'g__DA101', u's__']
18	799342$$[u'k__Bacteria', u'p__Proteobacteria', u'c__Alphaproteobacteria', u'o__Rhodospirillales', u'f__Acetobacteraceae', u'g__', u's__']
19	4422142$$[u'k__Bacteria', u'p__Proteobacteria', u'c__Betaproteobacteria', u'o__Burkholderiales', u'f__Comamonadaceae', u'g__Hydrogenophaga', u's__']
20	549954$$[u'k__Bacteria', u'p__Chloroflexi', u'c__Thermomicrobia', u'o__JG30-KF-CM45', u'f__', u'g__', u's__']
21	4397941$$[u'k__Bacteria', u'p__Acidobacteria', u'c__Solibacteres', u'o__Solibacterales', u'f__Solibacteraceae', u'g__Candidatus Solibacter', u's__']
22	4091471$$[u'k__Bacteria', u'p__Acidobacteria', u'c__Acidobacteria-6', u'o__iii1-15', u'f__', u'g__', u's__']
23	104216$$[u'k__Bacteria', u'p__Verrucomicrobia', u'c__[Spartobacteria]', u'o__[Chthoniobacterales]', u'f__[Chthoniobacteraceae]', u'g__DA101', u's__']
24	226395$$[u'k__Bacteria', u'p__Actinobacteria', u'c__Acidimicrobiia', u'o__Acidimicrobiales', u'f__', u'g__', u's__']
25	256454$$[u'k__Bacteria', u'p__Bacteroidetes', u'c__Flavobacteriia', u'o__Flavobacteriales', u'f__Cryomorphaceae', u'g__', u's__']
26	2471299$$[u'k__Bacteria', u'p__Proteobacteria', u'c__Alphaproteobacteria']
27	4454140$$[u'k__Bacteria', u'p__Firmicutes', u'c__Bacilli', u'o__Bacillales', u'f__Bacillaceae', u'g__Bacillus', u's__flexus']
28	2863166$$[u'k__Bacteria', u'p__Proteobacteria', u'c__Alphaproteobacteria', u'o__Rhizobiales', u'f__', u'g__', u's__']
29	4363347$$[u'k__Bacteria', u'p__Proteobacteria', u'c__Alphaproteobacteria', u'o__Rhizobiales', u'f__Hyphomicrobiaceae', u'g__Rhodoplanes', u's__']
30	4361561$$[u'k__Bacteria', u'p__Acidobacteria', u'c__Solibacteres', u'o__Solibacterales', u'f__Solibacteraceae', u'g__Candidatus Solibacter', u's__']
31	632692$$[u'k__Bacteria', u'p__Bacteroidetes', u'c__[Saprospirae]', u'o__[Saprospirales]', u'f__Chitinophagaceae', u'g__', u's__']
32	4295889$$[u'k__Bacteria', u'p__Verrucomicrobia', u'c__[Pedosphaerae]', u'o__[Pedosphaerales]', u'f__Ellin517', u'g__', u's__']
33	4298530$$[u'k__Bacteria', u'p__Proteobacteria', u'c__Gammaproteobacteria', u'o__Xanthomonadales', u'f__Xanthomonadaceae']
34	153982$$[u'k__Bacteria', u'p__Proteobacteria', u'c__Alphaproteobacteria', u'o__Rhizobiales', u'f__Phyllobacteriaceae', u'g__Mesorhizobium', u's__']
35	657718$$[u'k__Bacteria', u'p__Proteobacteria', u'c__Alphaproteobacteria', u'o__Rhizobiales', u'f__Hyphomicrobiaceae', u'g__Rhodoplanes', u's__']
36	4301852$$[u'k__Bacteria', u'p__Proteobacteria', u'c__Alphaproteobacteria', u'o__Sphingomonadales', u'f__Sphingomonadaceae']
37	2035204$$[u'k__Bacteria', u'p__Proteobacteria', u'c__Gammaproteobacteria', u'o__Aeromonadales', u'f__Aeromonadaceae']
38	540592$$[u'k__Bacteria', u'p__Proteobacteria', u'c__Deltaproteobacteria', u'o__Myxococcales', u'f__', u'g__', u's__']
39	323929$$[u'k__Bacteria', u'p__Proteobacteria', u'c__Alphaproteobacteria', u'o__Rhizobiales', u'f__Phyllobacteriaceae', u'g__Mesorhizobium', u's__']
40	4380399$$[u'k__Bacteria', u'p__Proteobacteria', u'c__Betaproteobacteria', u'o__MND1', u'f__', u'g__', u's__']
41	4298513$$[u'k__Bacteria', u'p__Nitrospirae', u'c__Nitrospira', u'o__Nitrospirales', u'f__Nitrospiraceae', u'g__Nitrospira', u's__']
42	671400$$[u'k__Bacteria', u'p__Acidobacteria', u'c__Solibacteres', u'o__Solibacterales', u'f__', u'g__', u's__']
43	1113692$$[u'k__Bacteria', u'p__Proteobacteria', u'c__Betaproteobacteria', u'o__Rhodocyclales', u'f__Rhodocyclaceae', u'g__Dechloromonas', u's__']
44	4464735$$[u'k__Bacteria', u'p__Proteobacteria', u'c__Betaproteobacteria', u'o__Neisseriales', u'f__Neisseriaceae', u'g__Vogesella', u's__']
45	559243$$[u'k__Bacteria', u'p__Proteobacteria', u'c__Gammaproteobacteria', u'o__', u'f__', u'g__', u's__']
46	4359270$$[u'k__Bacteria', u'p__Gemmatimonadetes', u'c__Gemmatimonadetes', u'o__KD8-87', u'f__', u'g__', u's__']
47	248032$$[u'k__Bacteria', u'p__Proteobacteria', u'c__Alphaproteobacteria', u'o__Rhizobiales', u'f__Hyphomicrobiaceae', u'g__Rhodoplanes', u's__']
48	3319380$$[u'k__Bacteria', u'p__Actinobacteria', u'c__Actinobacteria', u'o__Actinomycetales', u'f__Nocardioidaceae']
49	883548$$[u'k__Bacteria', u'p__Proteobacteria', u'c__Gammaproteobacteria', u'o__Xanthomonadales', u'f__Sinobacteraceae', u'g__', u's__']
50	1126475$$[u'k__Bacteria', u'p__Bacteroidetes', u'c__Cytophagia', u'o__Cytophagales', u'f__Cytophagaceae', u'g__Emticicia', u's__']
51	2115777$$[u'k__Bacteria', u'p__Actinobacteria', u'c__Actinobacteria', u'o__Actinomycetales', u'f__Streptomycetaceae']
52	364805$$[u'k__Bacteria', u'p__Actinobacteria', u'c__Actinobacteria', u'o__Actinomycetales', u'f__Geodermatophilaceae', u'g__', u's__']
53	65677$$[u'k__Bacteria', u'p__WS2', u'c__SHA-109', u'o__', u'f__', u'g__', u's__']
54	571700$$[u'k__Bacteria', u'p__Chloroflexi', u'c__S085', u'o__', u'f__', u'g__', u's__']
55	725990$$[u'k__Bacteria', u'p__Actinobacteria', u'c__Actinobacteria', u'o__Actinomycetales', u'f__Micrococcaceae']
56	4139697$$[u'k__Bacteria', u'p__Proteobacteria', u'c__Alphaproteobacteria', u'o__Rhizobiales', u'f__Hyphomicrobiaceae', u'g__Rhodoplanes', u's__']
57	989766$$[u'k__Bacteria', u'p__Actinobacteria', u'c__Thermoleophilia', u'o__Gaiellales', u'f__', u'g__', u's__']
58	4427861$$[u'k__Bacteria', u'p__Proteobacteria', u'c__Alphaproteobacteria', u'o__Rhizobiales', u'f__Hyphomicrobiaceae', u'g__Rhodoplanes', u's__']
59	889549$$[u'k__Bacteria', u'p__Bacteroidetes', u'c__[Saprospirae]', u'o__[Saprospirales]', u'f__Chitinophagaceae', u'g__', u's__']
60	40443$$[u'k__Bacteria', u'p__Proteobacteria', u'c__Gammaproteobacteria', u'o__Xanthomonadales', u'f__Xanthomonadaceae']
61	723100$$[u'k__Bacteria', u'p__Proteobacteria', u'c__Alphaproteobacteria', u'o__Rhizobiales', u'f__Hyphomicrobiaceae', u'g__Rhodoplanes', u's__']
62	354337$$[u'k__Bacteria', u'p__Acidobacteria', u'c__Acidobacteria-5', u'o__', u'f__', u'g__', u's__']
63	957360$$[u'k__Bacteria', u'p__Actinobacteria', u'c__Thermoleophilia', u'o__Gaiellales', u'f__Gaiellaceae', u'g__', u's__']
64	593492$$[u'k__Bacteria', u'p__Actinobacteria', u'c__Actinobacteria', u'o__Actinomycetales', u'f__Micromonosporaceae', u'g__Pilimelia', u's__']
65	1110836$$[u'k__Bacteria', u'p__Bacteroidetes', u'c__[Saprospirae]', u'o__[Saprospirales]', u'f__Chitinophagaceae', u'g__', u's__']
66	591157$$[u'k__Bacteria', u'p__Proteobacteria', u'c__Betaproteobacteria', u'o__', u'f__', u'g__', u's__']
67	328810$$[u'k__Bacteria', u'p__Acidobacteria', u'c__Acidobacteria-6']
68	4101333$$[u'k__Bacteria', u'p__Proteobacteria', u'c__Alphaproteobacteria', u'o__Rhizobiales', u'f__Hyphomicrobiaceae', u'g__Rhodoplanes', u's__']
69	1125638$$[u'k__Bacteria', u'p__Proteobacteria', u'c__Gammaproteobacteria', u'o__Xanthomonadales', u'f__Sinobacteraceae', u'g__', u's__']
70	225546$$[u'k__Bacteria', u'p__Proteobacteria', u'c__Alphaproteobacteria', u'o__Rhodospirillales', u'f__Rhodospirillaceae', u'g__', u's__']
71	4448576$$[u'k__Bacteria', u'p__Acidobacteria', u'c__Acidobacteria-6', u'o__iii1-15', u'f__RB40', u'g__', u's__']
72	4371421$$[u'k__Bacteria', u'p__Proteobacteria', u'c__Alphaproteobacteria', u'o__Rhizobiales', u'f__Hyphomicrobiaceae', u'g__Hyphomicrobium']
73	622731$$[u'k__Bacteria', u'p__Proteobacteria', u'c__Alphaproteobacteria', u'o__Rhodospirillales', u'f__Rhodospirillaceae', u'g__', u's__']
74	4319207$$[u'k__Bacteria', u'p__Gemmatimonadetes', u'c__Gemmatimonadetes', u'o__', u'f__', u'g__', u's__']
75	565604$$[u'k__Bacteria', u'p__Proteobacteria', u'c__Deltaproteobacteria', u'o__Myxococcales']
76	225158$$[u'k__Bacteria', u'p__Verrucomicrobia', u'c__[Spartobacteria]', u'o__[Chthoniobacterales]', u'f__[Chthoniobacteraceae]', u'g__DA101', u's__']
77	225485$$[u'k__Bacteria', u'p__Actinobacteria', u'c__Thermoleophilia', u'o__Gaiellales', u'f__Gaiellaceae', u'g__', u's__']
78	4421534$$[u'k__Bacteria', u'p__Proteobacteria', u'c__Betaproteobacteria', u'o__Burkholderiales', u'f__Comamonadaceae']
79	4465540$$[u'k__Bacteria', u'p__Actinobacteria', u'c__Actinobacteria', u'o__Actinomycetales', u'f__Intrasporangiaceae', u'g__Terracoccus', u's__']
80	324217$$[u'k__Bacteria', u'p__Actinobacteria', u'c__Actinobacteria', u'o__Actinomycetales', u'f__Nocardioidaceae', u'g__', u's__']
81	2984011$$[u'k__Bacteria', u'p__Gemmatimonadetes', u'c__Gemm-1', u'o__', u'f__', u'g__', u's__']
82	4434810$$[u'k__Bacteria', u'p__Acidobacteria', u'c__Solibacteres', u'o__Solibacterales', u'f__', u'g__', u's__']
83	541884$$[u'k__Bacteria', u'p__Proteobacteria', u'c__Betaproteobacteria', u'o__Neisseriales', u'f__Neisseriaceae', u'g__Chitinimonas', u's__taiwanensis']
84	1108943$$[u'k__Bacteria', u'p__OD1', u'c__ABY1', u'o__', u'f__', u'g__', u's__']
85	105642$$[u'k__Bacteria', u'p__Proteobacteria', u'c__Alphaproteobacteria', u'o__Rhodospirillales', u'f__Rhodospirillaceae', u'g__Azospirillum', u's__']
86	102915$$[u'k__Bacteria', u'p__Proteobacteria', u'c__Alphaproteobacteria', u'o__Sphingomonadales', u'f__Sphingomonadaceae', u'g__Sphingomonas']
87	646970$$[u'k__Bacteria', u'p__Proteobacteria', u'c__Betaproteobacteria', u'o__Rhodocyclales', u'f__Rhodocyclaceae', u'g__Dechloromonas', u's__']
88	146122$$[u'k__Bacteria', u'p__Actinobacteria', u'c__Actinobacteria', u'o__Actinomycetales']
89	349986$$[u'k__Bacteria', u'p__Chloroflexi', u'c__Thermomicrobia', u'o__AKYG1722', u'f__', u'g__', u's__']
90	827709$$[u'k__Bacteria', u'p__Planctomycetes', u'c__Phycisphaerae', u'o__WD2101', u'f__', u'g__', u's__']
91	237703$$[u'k__Bacteria', u'p__Actinobacteria', u'c__Acidimicrobiia', u'o__Acidimicrobiales', u'f__EB1017', u'g__', u's__']
92	352324$$[u'k__Bacteria', u'p__Acidobacteria', u'c__Acidobacteria-6']
93	810882$$[u'k__Bacteria', u'p__Acidobacteria', u'c__Acidobacteria-6', u'o__iii1-15', u'f__mb2424', u'g__', u's__']
94	133533$$[u'k__Bacteria', u'p__Proteobacteria', u'c__Gammaproteobacteria', u'o__Pseudomonadales', u'f__Pseudomonadaceae', u'g__Pseudomonas']
95	648274$$[u'k__Bacteria', u'p__Proteobacteria', u'c__Betaproteobacteria', u'o__Rhodocyclales', u'f__Rhodocyclaceae']
96	207813$$[u'k__Bacteria', u'p__Proteobacteria', u'c__Gammaproteobacteria', u'o__Xanthomonadales', u'f__Xanthomonadaceae']
97	740317$$[u'k__Bacteria', u'p__Proteobacteria', u'c__Alphaproteobacteria', u'o__Rhizobiales', u'f__Bradyrhizobiaceae', u'g__Bradyrhizobium', u's__']
98	3928395$$[u'k__Bacteria', u'p__Proteobacteria', u'c__Alphaproteobacteria', u'o__Sphingomonadales', u'f__Sphingomonadaceae', u'g__Sphingobium', u's__']
99	144633$$[u'k__Bacteria', u'p__Chloroflexi', u'c__Anaerolineae', u'o__H39', u'f__', u'g__', u's__']
100	144181$$[u'k__Bacteria', u'p__Proteobacteria', u'c__Betaproteobacteria', u'o__Rhodocyclales', u'f__Rhodocyclaceae', u'g__Dechloromonas', u's__']
101	222755$$[u'k__Bacteria', u'p__Actinobacteria', u'c__Acidimicrobiia', u'o__Acidimicrobiales', u'f__C111', u'g__', u's__']
102	4368271$$[u'k__Bacteria', u'p__Proteobacteria', u'c__Betaproteobacteria', u'o__SC-I-84', u'f__', u'g__', u's__']
103	243181$$[u'k__Bacteria', u'p__Acidobacteria', u'c__Acidobacteria-5', u'o__', u'f__', u'g__', u's__']
104	4366499$$[u'k__Bacteria', u'p__Proteobacteria', u'c__Alphaproteobacteria', u'o__Rhodospirillales', u'f__', u'g__', u's__']
105	947354$$[u'k__Bacteria', u'p__Actinobacteria', u'c__Actinobacteria', u'o__Actinomycetales', u'f__Pseudonocardiaceae', u'g__Pseudonocardia', u's__']
106	323954$$[u'k__Bacteria', u'p__Proteobacteria', u'c__Alphaproteobacteria', u'o__Rhizobiales', u'f__Phyllobacteriaceae']
107	539570$$[u'k__Bacteria', u'p__Acidobacteria', u'c__Acidobacteria-6']
108	1118109$$[u'k__Bacteria', u'p__Proteobacteria', u'c__Betaproteobacteria', u'o__MND1', u'f__', u'g__', u's__']
109	125157$$[u'k__Bacteria', u'p__Actinobacteria', u'c__Acidimicrobiia', u'o__Acidimicrobiales', u'f__C111', u'g__', u's__']
110	576059$$[u'k__Bacteria', u'p__Acidobacteria', u'c__Solibacteres', u'o__Solibacterales', u'f__Solibacteraceae', u'g__Candidatus Solibacter', u's__']
111	4323609$$[u'k__Bacteria', u'p__Proteobacteria', u'c__Betaproteobacteria', u'o__Rhodocyclales', u'f__Rhodocyclaceae', u'g__Dechloromonas', u's__']
112	367995$$[u'k__Bacteria', u'p__Proteobacteria', u'c__Alphaproteobacteria', u'o__Sphingomonadales', u'f__Sphingomonadaceae', u'g__Kaistobacter', u's__']
113	1124681$$[u'k__Bacteria', u'p__Proteobacteria', u'c__Betaproteobacteria', u'o__Burkholderiales', u'f__Comamonadaceae']
114	704830$$[u'k__Bacteria', u'p__Actinobacteria', u'c__Actinobacteria', u'o__Actinomycetales', u'f__Geodermatophilaceae', u'g__Geodermatophilus']
115	130710$$[u'k__Bacteria', u'p__Actinobacteria', u'c__Actinobacteria', u'o__Actinomycetales', u'f__Micrococcaceae']
116	105150$$[u'k__Bacteria', u'p__Gemmatimonadetes', u'c__Gemmatimonadetes', u'o__Gemmatimonadales', u'f__Ellin5301', u'g__', u's__']
117	4422114$$[u'k__Bacteria', u'p__Actinobacteria', u'c__Actinobacteria', u'o__Actinomycetales', u'f__Streptomycetaceae']
118	815975$$[u'k__Bacteria', u'p__Proteobacteria', u'c__Alphaproteobacteria', u'o__Rhodobacterales', u'f__Hyphomonadaceae', u'g__', u's__']
119	130382$$[u'k__Bacteria', u'p__Gemmatimonadetes', u'c__Gemm-1', u'o__', u'f__', u'g__', u's__']
120	962736$$[u'k__Bacteria', u'p__Proteobacteria', u'c__Gammaproteobacteria', u'o__HTCC2188', u'f__HTCC2089', u'g__', u's__']
121	253660$$[u'k__Bacteria', u'p__Actinobacteria', u'c__Actinobacteria', u'o__Actinomycetales', u'f__Streptomycetaceae']
122	304694$$[u'k__Bacteria', u'p__Proteobacteria', u'c__Alphaproteobacteria', u'o__Rhizobiales']
123	246068$$[u'k__Bacteria', u'p__Proteobacteria', u'c__Alphaproteobacteria', u'o__Rhizobiales', u'f__Hyphomicrobiaceae', u'g__Pedomicrobium', u's__']
124	1110303$$[u'k__Bacteria', u'p__Proteobacteria', u'c__Gammaproteobacteria', u'o__Xanthomonadales', u'f__Sinobacteraceae', u'g__', u's__']
125	1106498$$[u'k__Bacteria', u'p__Nitrospirae', u'c__Nitrospira', u'o__Nitrospirales', u'f__Nitrospiraceae', u'g__Nitrospira', u's__']
126	361902$$[u'k__Bacteria', u'p__Bacteroidetes', u'c__Sphingobacteriia', u'o__Sphingobacteriales', u'f__', u'g__', u's__']
127	528213$$[u'k__Bacteria', u'p__Actinobacteria', u'c__Actinobacteria', u'o__Actinomycetales', u'f__Nocardioidaceae', u'g__', u's__']
128	848129$$[u'k__Bacteria', u'p__Proteobacteria', u'c__Alphaproteobacteria', u'o__Rhodospirillales', u'f__Rhodospirillaceae', u'g__Magnetospirillum', u's__']
129	2068089$$[u'k__Bacteria', u'p__Acidobacteria', u'c__Acidobacteria-6', u'o__CCU21', u'f__', u'g__', u's__']
130	1050747$$[u'k__Bacteria', u'p__Verrucomicrobia', u'c__[Spartobacteria]', u'o__[Chthoniobacterales]', u'f__[Chthoniobacteraceae]', u'g__Candidatus Xiphinematobacter', u's__']
131	1142871$$[u'k__Bacteria', u'p__Actinobacteria', u'c__MB-A2-108', u'o__0319-7L14', u'f__', u'g__', u's__']
132	4458424$$[u'k__Bacteria', u'p__Proteobacteria', u'c__Alphaproteobacteria', u'o__Sphingomonadales', u'f__Sphingomonadaceae']
133	320069$$[u'k__Bacteria', u'p__Planctomycetes', u'c__Planctomycetia', u'o__Pirellulales', u'f__Pirellulaceae']
134	4349099$$[u'k__Bacteria', u'p__Proteobacteria', u'c__Alphaproteobacteria', u'o__Rhizobiales', u'f__Hyphomicrobiaceae', u'g__Hyphomicrobium']
135	818411$$[u'k__Bacteria', u'p__Proteobacteria', u'c__Alphaproteobacteria', u'o__Rhodospirillales', u'f__Rhodospirillaceae']
136	893232$$[u'k__Bacteria', u'p__Proteobacteria', u'c__Alphaproteobacteria', u'o__Rhodospirillales', u'f__', u'g__', u's__']
137	978255$$[u'k__Bacteria', u'p__Actinobacteria', u'c__Acidimicrobiia', u'o__Acidimicrobiales', u'f__C111', u'g__', u's__']
138	358590$$[u'k__Bacteria', u'p__Gemmatimonadetes', u'c__Gemm-1', u'o__', u'f__', u'g__', u's__']
139	317424$$[u'k__Bacteria', u'p__Proteobacteria', u'c__Betaproteobacteria', u'o__Burkholderiales', u'f__Comamonadaceae', u'g__Ramlibacter', u's__']
140	4311518$$[u'k__Bacteria', u'p__Proteobacteria', u'c__Alphaproteobacteria', u'o__Rhodospirillales', u'f__Rhodospirillaceae', u'g__Skermanella', u's__']
141	946052$$[u'k__Bacteria', u'p__Proteobacteria', u'c__Alphaproteobacteria', u'o__Rhodospirillales', u'f__Acetobacteraceae', u'g__', u's__']
142	4479100$$[u'k__Bacteria', u'p__Actinobacteria', u'c__Thermoleophilia', u'o__Gaiellales', u'f__Gaiellaceae', u'g__', u's__']
143	4389972$$[u'k__Bacteria', u'p__Acidobacteria', u'c__Solibacteres', u'o__Solibacterales', u'f__', u'g__', u's__']
144	267323$$[u'k__Bacteria', u'p__Actinobacteria', u'c__Actinobacteria', u'o__Actinomycetales', u'f__Micrococcaceae']
145	3276016$$[u'k__Bacteria', u'p__Planctomycetes', u'c__Planctomycetia', u'o__Gemmatales', u'f__Gemmataceae', u'g__', u's__']
146	4424904$$[u'k__Bacteria', u'p__Proteobacteria', u'c__Deltaproteobacteria', u'o__Desulfuromonadales', u'f__Geobacteraceae', u'g__Geobacter', u's__']
147	992170$$[u'k__Bacteria', u'p__Proteobacteria', u'c__Betaproteobacteria', u'o__Burkholderiales', u'f__Comamonadaceae']
148	236676$$[u'k__Bacteria', u'p__Proteobacteria', u'c__Alphaproteobacteria', u'o__Ellin329', u'f__', u'g__', u's__']
149	4361131$$[u'k__Bacteria', u'p__Verrucomicrobia', u'c__[Spartobacteria]', u'o__[Chthoniobacterales]', u'f__[Chthoniobacteraceae]', u'g__OR-59', u's__']
150	368218$$[u'k__Bacteria', u'p__Actinobacteria', u'c__Thermoleophilia', u'o__Gaiellales', u'f__Gaiellaceae', u'g__', u's__']
151	822006$$[u'k__Bacteria', u'p__Planctomycetes', u'c__Phycisphaerae', u'o__WD2101', u'f__', u'g__', u's__']
152	4468125$$[u'k__Bacteria', u'p__Actinobacteria', u'c__Actinobacteria', u'o__Actinomycetales', u'f__Nocardiaceae', u'g__Rhodococcus', u's__']
153	214620$$[u'k__Bacteria', u'p__Planctomycetes', u'c__Pla4', u'o__', u'f__', u'g__', u's__']
154	962282$$[u'k__Bacteria', u'p__Actinobacteria', u'c__Thermoleophilia', u'o__Solirubrobacterales', u'f__', u'g__', u's__']
155	134209$$[u'k__Bacteria', u'p__Actinobacteria', u'c__Actinobacteria', u'o__Actinomycetales', u'f__Micrococcaceae']
156	4308119$$[u'k__Bacteria', u'p__Proteobacteria', u'c__Deltaproteobacteria', u'o__Desulfuromonadales', u'f__Geobacteraceae']
157	676066$$[u'k__Bacteria', u'p__Proteobacteria', u'c__Alphaproteobacteria', u'o__Rhizobiales', u'f__Bradyrhizobiaceae']
158	2078498$$[u'k__Bacteria', u'p__Bacteroidetes', u'c__Sphingobacteriia', u'o__Sphingobacteriales', u'f__Sphingobacteriaceae', u'g__', u's__']
159	895465$$[u'k__Bacteria', u'p__Actinobacteria', u'c__Thermoleophilia', u'o__Solirubrobacterales', u'f__Conexibacteraceae', u'g__', u's__']
160	833957$$[u'k__Bacteria', u'p__Chloroflexi', u'c__Ellin6529', u'o__', u'f__', u'g__', u's__']
161	167755$$[u'k__Bacteria', u'p__Chloroflexi', u'c__Anaerolineae', u'o__SBR1031', u'f__A4b', u'g__', u's__']
162	3231020$$[u'k__Bacteria', u'p__Actinobacteria', u'c__Thermoleophilia', u'o__Solirubrobacterales', u'f__', u'g__', u's__']
163	368890$$[u'k__Bacteria', u'p__Acidobacteria', u'c__Acidobacteria-6', u'o__iii1-15', u'f__', u'g__', u's__']
164	106838$$[u'k__Bacteria', u'p__Proteobacteria', u'c__Alphaproteobacteria', u'o__Rhizobiales', u'f__Hyphomicrobiaceae', u'g__Hyphomicrobium', u's__']
165	4313359$$[u'k__Bacteria', u'p__Acidobacteria', u'c__[Chloracidobacteria]', u'o__RB41', u'f__', u'g__', u's__']
166	1107999$$[u'k__Bacteria', u'p__Actinobacteria', u'c__Actinobacteria', u'o__Actinomycetales', u'f__Micrococcaceae']
167	4356724$$[u'k__Bacteria', u'p__Actinobacteria', u'c__Actinobacteria', u'o__Actinomycetales', u'f__Nocardioidaceae', u'g__', u's__']
168	581021$$[u'k__Bacteria', u'p__Proteobacteria', u'c__Gammaproteobacteria', u'o__Enterobacteriales', u'f__Enterobacteriaceae']
169	1090903$$[u'k__Bacteria', u'p__Proteobacteria', u'c__Betaproteobacteria', u'o__Rhodocyclales', u'f__Rhodocyclaceae', u'g__Sulfuritalea', u's__']
170	3926111$$[u'k__Bacteria', u'p__Proteobacteria', u'c__Alphaproteobacteria', u'o__Rhizobiales', u'f__Hyphomicrobiaceae', u'g__Devosia', u's__']
171	4321229$$[u'k__Bacteria', u'p__Proteobacteria', u'c__Betaproteobacteria', u'o__Burkholderiales', u'f__Comamonadaceae', u'g__Polaromonas', u's__']
172	1037256$$[u'k__Bacteria', u'p__Actinobacteria', u'c__Thermoleophilia', u'o__Gaiellales', u'f__Gaiellaceae', u'g__', u's__']
173	235943$$[u'k__Bacteria', u'p__Actinobacteria', u'c__Thermoleophilia', u'o__Solirubrobacterales', u'f__Solirubrobacteraceae', u'g__', u's__']
174	949332$$[u'k__Bacteria', u'p__Proteobacteria', u'c__Alphaproteobacteria', u'o__Sphingomonadales', u'f__Sphingomonadaceae', u'g__Sphingomonas', u's__echinoides']
175	1011476$$[u'k__Bacteria', u'p__Actinobacteria', u'c__Acidimicrobiia', u'o__Acidimicrobiales', u'f__C111', u'g__', u's__']
176	31253$$[u'k__Bacteria', u'p__Verrucomicrobia', u'c__[Pedosphaerae]', u'o__[Pedosphaerales]', u'f__auto67_4W', u'g__', u's__']
177	902698$$[u'k__Bacteria', u'p__Actinobacteria', u'c__Actinobacteria', u'o__Actinomycetales', u'f__Nocardioidaceae', u'g__', u's__']
178	4467425$$[u'k__Bacteria', u'p__Proteobacteria', u'c__Alphaproteobacteria', u'o__Rhizobiales', u'f__Hyphomicrobiaceae', u'g__Rhodoplanes', u's__']
179	1109445$$[u'k__Bacteria', u'p__Proteobacteria', u'c__Alphaproteobacteria', u'o__BD7-3', u'f__', u'g__', u's__']
180	1012668$$[u'k__Bacteria', u'p__Actinobacteria', u'c__Acidimicrobiia', u'o__Acidimicrobiales', u'f__EB1017', u'g__', u's__']
181	823633$$[u'k__Bacteria', u'p__Actinobacteria', u'c__Actinobacteria', u'o__Actinomycetales', u'f__Mycobacteriaceae', u'g__Mycobacterium', u's__']
182	New.ReferenceOTU912$$[u'k__Bacteria', u'p__Proteobacteria', u'c__Betaproteobacteria', u'o__A21b', u'f__UD5', u'g__', u's__']
183	New.ReferenceOTU2351$$[u'k__Bacteria', u'p__Proteobacteria', u'c__Alphaproteobacteria', u'o__Caulobacterales', u'f__Caulobacteraceae', u'g__Asticcacaulis', u's__biprosthecium']
184	New.ReferenceOTU1069$$[u'k__Bacteria', u'p__OD1', u'c__ZB2', u'o__', u'f__', u'g__', u's__']
185	New.ReferenceOTU1062$$[u'k__Bacteria', u'p__Proteobacteria', u'c__Alphaproteobacteria', u'o__Rhizobiales']
186	New.ReferenceOTU1669$$[u'k__Bacteria', u'p__Actinobacteria', u'c__Actinobacteria', u'o__Actinomycetales', u'f__Mycobacteriaceae', u'g__Mycobacterium']
187	New.ReferenceOTU1405$$[u'k__Bacteria', u'p__Actinobacteria', u'c__Actinobacteria', u'o__Actinomycetales', u'f__Streptomycetaceae', u'g__Streptomyces', u's__']
188	New.ReferenceOTU1319$$[u'k__Bacteria', u'p__Verrucomicrobia', u'c__Verrucomicrobiae', u'o__Verrucomicrobiales', u'f__Verrucomicrobiaceae', u'g__', u's__']
189	New.ReferenceOTU455$$[u'k__Bacteria', u'p__Bacteroidetes', u'c__[Saprospirae]', u'o__[Saprospirales]', u'f__Chitinophagaceae', u'g__', u's__']
190	New.ReferenceOTU108$$[u'k__Bacteria', u'p__Proteobacteria', u'c__Deltaproteobacteria', u'o__Desulfobacterales', u'f__Desulfobulbaceae', u'g__', u's__']
191	New.ReferenceOTU102$$[u'k__Bacteria', u'p__Proteobacteria', u'c__Betaproteobacteria', u'o__Ellin6067', u'f__', u'g__', u's__']
192	New.ReferenceOTU851$$[u'k__Bacteria', u'p__Actinobacteria', u'c__Actinobacteria', u'o__Actinomycetales', u'f__Mycobacteriaceae', u'g__Mycobacterium', u's__']
193	New.ReferenceOTU2320$$[u'k__Bacteria', u'p__Planctomycetes', u'c__Phycisphaerae', u'o__Phycisphaerales']
194	New.ReferenceOTU2032$$[u'k__Bacteria', u'p__Gemmatimonadetes', u'c__Gemm-1', u'o__', u'f__', u'g__', u's__']
195	New.ReferenceOTU1247$$[u'k__Bacteria', u'p__Proteobacteria', u'c__Betaproteobacteria', u'o__Rhodocyclales', u'f__Rhodocyclaceae']
196	New.ReferenceOTU1797$$[u'k__Bacteria', u'p__Chloroflexi', u'c__Chloroflexi', u'o__[Roseiflexales]', u'f__[Kouleothrixaceae]', u'g__', u's__']
197	New.ReferenceOTU1677$$[u'k__Bacteria', u'p__Actinobacteria', u'c__MB-A2-108', u'o__0319-7L14', u'f__', u'g__', u's__']
198	New.ReferenceOTU1307$$[u'k__Bacteria', u'p__Proteobacteria', u'c__Betaproteobacteria', u'o__Rhodocyclales', u'f__Rhodocyclaceae', u'g__Dechloromonas', u's__']
199	New.ReferenceOTU2512$$[u'k__Bacteria', u'p__Chloroflexi', u'c__Thermomicrobia', u'o__JG30-KF-CM45', u'f__', u'g__', u's__']
200	New.ReferenceOTU936$$[u'k__Bacteria', u'p__Acidobacteria', u'c__Acidobacteria-6', u'o__iii1-15', u'f__RB40', u'g__', u's__']
201	New.ReferenceOTU2026$$[u'k__Bacteria', u'p__OD1', u'c__ABY1', u'o__', u'f__', u'g__', u's__']
202	New.ReferenceOTU2021$$[u'k__Bacteria', u'p__Planctomycetes', u'c__OM190', u'o__CL500-15', u'f__', u'g__', u's__']
203	New.ReferenceOTU1938$$[u'k__Bacteria', u'p__Gemmatimonadetes', u'c__Gemm-1', u'o__', u'f__', u'g__', u's__']
204	New.ReferenceOTU1246$$[u'k__Bacteria', u'p__Planctomycetes', u'c__Pla4', u'o__', u'f__', u'g__', u's__']
205	New.ReferenceOTU1646$$[u'k__Bacteria', u'p__OD1', u'c__ZB2', u'o__', u'f__', u'g__', u's__']
206	New.ReferenceOTU2524$$[u'k__Bacteria', u'p__Planctomycetes', u'c__OM190', u'o__agg27', u'f__', u'g__', u's__']
207	New.ReferenceOTU125$$[u'k__Bacteria', u'p__Chloroflexi', u'c__Gitt-GS-136', u'o__', u'f__', u'g__', u's__']
208	New.ReferenceOTU124$$[u'k__Bacteria', u'p__Planctomycetes', u'c__Phycisphaerae', u'o__WD2101', u'f__', u'g__', u's__']
209	New.ReferenceOTU121$$[u'k__Bacteria', u'p__Planctomycetes', u'c__Phycisphaerae', u'o__WD2101', u'f__', u'g__', u's__']
210	New.ReferenceOTU2235$$[u'k__Bacteria', u'p__Actinobacteria', u'c__Actinobacteria', u'o__Actinomycetales', u'f__Nocardioidaceae', u'g__', u's__']
211	New.ReferenceOTU2653$$[u'k__Bacteria', u'p__Acidobacteria', u'c__Solibacteres', u'o__Solibacterales', u'f__', u'g__', u's__']
212	New.ReferenceOTU2018$$[u'k__Bacteria', u'p__OD1', u'c__ZB2', u'o__', u'f__', u'g__', u's__']
213	New.ReferenceOTU1925$$[u'k__Bacteria', u'p__Proteobacteria', u'c__Betaproteobacteria', u'o__Ellin6067', u'f__', u'g__', u's__']
214	New.ReferenceOTU1923$$[u'k__Bacteria', u'p__Actinobacteria', u'c__Thermoleophilia', u'o__Gaiellales', u'f__Gaiellaceae', u'g__', u's__']
215	New.ReferenceOTU1252$$[u'k__Bacteria', u'p__Proteobacteria', u'c__Betaproteobacteria', u'o__MND1', u'f__', u'g__', u's__']
216	New.ReferenceOTU1431$$[u'k__Bacteria', u'p__Acidobacteria', u'c__Acidobacteriia', u'o__Acidobacteriales', u'f__Koribacteraceae', u'g__', u's__']
217	New.ReferenceOTU1438$$[u'k__Bacteria', u'p__Acidobacteria', u'c__Acidobacteria-6', u'o__iii1-15', u'f__', u'g__', u's__']
218	New.ReferenceOTU1327$$[u'k__Bacteria', u'p__Actinobacteria', u'c__Acidimicrobiia', u'o__Acidimicrobiales', u'f__', u'g__', u's__']
219	New.ReferenceOTU1323$$[u'k__Bacteria', u'p__Actinobacteria', u'c__Thermoleophilia', u'o__Gaiellales', u'f__', u'g__', u's__']
220	New.ReferenceOTU2536$$[u'k__Bacteria', u'p__Verrucomicrobia', u'c__[Pedosphaerae]', u'o__[Pedosphaerales]', u'f__Ellin515', u'g__', u's__']
221	New.ReferenceOTU428$$[u'k__Bacteria', u'p__Actinobacteria', u'c__Actinobacteria', u'o__Actinomycetales', u'f__Streptomycetaceae']
222	New.ReferenceOTU2002$$[u'k__Bacteria', u'p__Proteobacteria', u'c__Alphaproteobacteria', u'o__Rhizobiales', u'f__Hyphomicrobiaceae', u'g__Pedomicrobium', u's__']
223	New.ReferenceOTU631$$[u'k__Bacteria', u'p__Actinobacteria', u'c__Acidimicrobiia', u'o__Acidimicrobiales', u'f__C111', u'g__', u's__']
224	New.ReferenceOTU636$$[u'k__Bacteria', u'p__Proteobacteria', u'c__Alphaproteobacteria', u'o__Rhizobiales', u'f__Hyphomicrobiaceae', u'g__Rhodoplanes', u's__']
225	New.ReferenceOTU385$$[u'k__Bacteria', u'p__Proteobacteria', u'c__Gammaproteobacteria', u'o__Xanthomonadales']
226	New.ReferenceOTU415$$[u'k__Bacteria', u'p__Actinobacteria', u'c__Actinobacteria', u'o__Actinomycetales', u'f__Geodermatophilaceae', u'g__', u's__']
227	New.ReferenceOTU892$$[u'k__Bacteria', u'p__Actinobacteria', u'c__Thermoleophilia', u'o__Solirubrobacterales']
228	New.ReferenceOTU961$$[u'k__Bacteria', u'p__Proteobacteria', u'c__Gammaproteobacteria', u'o__Xanthomonadales', u'f__Xanthomonadaceae', u'g__', u's__']
229	New.ReferenceOTU499$$[u'k__Bacteria', u'p__Actinobacteria', u'c__Actinobacteria', u'o__Actinomycetales', u'f__Nocardioidaceae', u'g__', u's__']
230	New.ReferenceOTU1230$$[u'k__Bacteria', u'p__Chloroflexi', u'c__Chloroflexi', u'o__[Roseiflexales]', u'f__[Kouleothrixaceae]', u'g__', u's__']
231	New.ReferenceOTU1238$$[u'k__Bacteria', u'p__Proteobacteria', u'c__Alphaproteobacteria', u'o__Rhizobiales', u'f__Bradyrhizobiaceae', u'g__', u's__']
232	New.ReferenceOTU1122$$[u'k__Bacteria', u'p__Proteobacteria', u'c__Alphaproteobacteria', u'o__Rhodospirillales', u'f__Rhodospirillaceae', u'g__', u's__']
233	New.ReferenceOTU404$$[u'k__Bacteria', u'p__Actinobacteria', u'c__Actinobacteria', u'o__Actinomycetales']
234	New.ReferenceOTU2246$$[u'k__Bacteria', u'p__Proteobacteria', u'c__Alphaproteobacteria', u'o__BD7-3', u'f__', u'g__', u's__']
235	New.ReferenceOTU572$$[u'k__Bacteria', u'p__Proteobacteria', u'c__Betaproteobacteria', u'o__Rhodocyclales', u'f__Rhodocyclaceae', u'g__Dechloromonas', u's__']
236	New.ReferenceOTU2667$$[u'k__Bacteria', u'p__Proteobacteria', u'c__Alphaproteobacteria', u'o__Rhodospirillales', u'f__Rhodospirillaceae', u'g__Magnetospirillum', u's__']
237	New.ReferenceOTU656$$[u'k__Bacteria', u'p__Planctomycetes', u'c__Planctomycetia', u'o__Gemmatales', u'f__Gemmataceae', u'g__Gemmata', u's__']
238	New.ReferenceOTU1977$$[u'k__Bacteria', u'p__OD1', u'c__ZB2', u'o__', u'f__', u'g__', u's__']
239	New.ReferenceOTU11$$[u'k__Bacteria', u'p__Proteobacteria', u'c__Alphaproteobacteria', u'o__Rhodospirillales', u'f__Rhodospirillaceae', u'g__', u's__']
240	New.ReferenceOTU1805$$[u'k__Bacteria', u'p__Chloroflexi', u'c__TK17', u'o__', u'f__', u'g__', u's__']
241	New.ReferenceOTU1806$$[u'k__Bacteria', u'p__Actinobacteria', u'c__Actinobacteria', u'o__Actinomycetales', u'f__Micromonosporaceae']
242	New.ReferenceOTU1807$$[u'k__Bacteria', u'p__Proteobacteria', u'c__Alphaproteobacteria', u'o__Rhodospirillales', u'f__Rhodospirillaceae', u'g__', u's__']
243	New.ReferenceOTU1204$$[u'k__Bacteria', u'p__Proteobacteria', u'c__Alphaproteobacteria', u'o__Sphingomonadales', u'f__Sphingomonadaceae', u'g__Sphingobium', u's__']
244	New.ReferenceOTU363$$[u'k__Bacteria', u'p__OD1', u'c__ZB2', u'o__', u'f__', u'g__', u's__']
245	New.ReferenceOTU366$$[u'k__Bacteria', u'p__Actinobacteria', u'c__Acidimicrobiia', u'o__Acidimicrobiales', u'f__EB1017', u'g__', u's__']
246	New.ReferenceOTU987$$[u'k__Bacteria', u'p__Chloroflexi', u'c__S085', u'o__', u'f__', u'g__', u's__']
247	New.ReferenceOTU1582$$[u'k__Bacteria', u'p__Planctomycetes', u'c__OM190', u'o__agg27', u'f__', u'g__', u's__']
248	New.ReferenceOTU1363$$[u'k__Bacteria', u'p__Bacteroidetes']
249	New.ReferenceOTU377$$[u'k__Bacteria', u'p__Proteobacteria', u'c__Alphaproteobacteria', u'o__Rhodospirillales', u'f__Rhodospirillaceae', u'g__', u's__']
250	New.ReferenceOTU2469$$[u'k__Bacteria', u'p__Proteobacteria', u'c__Alphaproteobacteria', u'o__Rhodospirillales', u'f__Rhodospirillaceae', u'g__Skermanella', u's__']
251	New.ReferenceOTU2269$$[u'k__Bacteria', u'p__Bacteroidetes', u'c__Sphingobacteriia', u'o__Sphingobacteriales', u'f__', u'g__', u's__']
252	New.ReferenceOTU2267$$[u'k__Bacteria', u'p__Chloroflexi', u'c__Ellin6529', u'o__', u'f__', u'g__', u's__']
253	New.ReferenceOTU511$$[u'k__Bacteria', u'p__Spirochaetes', u'c__Spirochaetes', u'o__Spirochaetales', u'f__Spirochaetaceae', u'g__Spirochaeta', u's__aurantia']
254	New.ReferenceOTU2602$$[u'k__Bacteria', u'p__Proteobacteria', u'c__Deltaproteobacteria', u'o__Desulfuromonadales']
255	New.ReferenceOTU208$$[u'k__Bacteria', u'p__Proteobacteria', u'c__Betaproteobacteria', u'o__Burkholderiales', u'f__Comamonadaceae']
256	New.ReferenceOTU35$$[u'k__Bacteria', u'p__Actinobacteria', u'c__Thermoleophilia', u'o__Gaiellales', u'f__Gaiellaceae', u'g__', u's__']
257	New.ReferenceOTU1823$$[u'k__Bacteria', u'p__Proteobacteria', u'c__Alphaproteobacteria', u'o__Rhodospirillales', u'f__Rhodospirillaceae']
258	New.ReferenceOTU742$$[u'k__Bacteria', u'p__Actinobacteria', u'c__Thermoleophilia', u'o__Solirubrobacterales', u'f__', u'g__', u's__']
259	New.ReferenceOTU1179$$[u'k__Bacteria', u'p__Proteobacteria', u'c__Gammaproteobacteria']
260	New.ReferenceOTU2458$$[u'k__Bacteria', u'p__Planctomycetes', u'c__Phycisphaerae', u'o__WD2101', u'f__', u'g__', u's__']
261	New.ReferenceOTU2452$$[u'k__Bacteria', u'p__Actinobacteria', u'c__Thermoleophilia', u'o__Solirubrobacterales', u'f__Solirubrobacteraceae', u'g__', u's__']
262	New.ReferenceOTU2707$$[u'k__Bacteria', u'p__Proteobacteria', u'c__Alphaproteobacteria', u'o__Sphingomonadales', u'f__Sphingomonadaceae', u'g__Sphingobium', u's__']
263	New.ReferenceOTU2148$$[u'k__Bacteria', u'p__Acidobacteria', u'c__PAUC37f', u'o__', u'f__', u'g__', u's__']
264	New.ReferenceOTU2260$$[u'k__Bacteria', u'p__Bacteroidetes']
265	New.ReferenceOTU754$$[u'k__Bacteria', u'p__Proteobacteria', u'c__Alphaproteobacteria', u'o__Rhodospirillales', u'f__Rhodospirillaceae', u'g__Azospirillum', u's__']
266	New.ReferenceOTU1766$$[u'k__Bacteria', u'p__WS3', u'c__PRR-12', u'o__Sediment-1', u'f__PRR-10', u'g__', u's__']
267	New.ReferenceOTU1541$$[u'k__Bacteria', u'p__Planctomycetes', u'c__Phycisphaerae', u'o__Phycisphaerales']
268	New.ReferenceOTU1387$$[u'k__Bacteria', u'p__Planctomycetes', u'c__Planctomycetia', u'o__Pirellulales', u'f__Pirellulaceae', u'g__', u's__']
269	New.ReferenceOTU2449$$[u'k__Bacteria', u'p__OD1', u'c__ABY1', u'o__', u'f__', u'g__', u's__']
270	New.ReferenceOTU1418$$[u'k__Bacteria', u'p__Actinobacteria', u'c__Acidimicrobiia', u'o__Acidimicrobiales', u'f__C111', u'g__', u's__']
271	New.ReferenceOTU825$$[u'k__Bacteria', u'p__Gemmatimonadetes', u'c__Gemm-1', u'o__', u'f__', u'g__', u's__']
272	New.ReferenceOTU1620$$[u'k__Bacteria', u'p__Actinobacteria', u'c__Actinobacteria', u'o__Actinomycetales', u'f__Intrasporangiaceae', u'g__Terracoccus', u's__']
273	New.ReferenceOTU1715$$[u'k__Bacteria', u'p__Planctomycetes', u'c__Planctomycetia', u'o__Gemmatales', u'f__Gemmataceae', u'g__', u's__']
274	New.ReferenceOTU1717$$[u'k__Bacteria', u'p__Acidobacteria', u'c__Acidobacteriia', u'o__Acidobacteriales']
275	New.ReferenceOTU1537$$[u'k__Bacteria', u'p__Chloroflexi', u'c__Thermomicrobia', u'o__JG30-KF-CM45', u'f__', u'g__', u's__']
276	New.ReferenceOTU329$$[u'k__Bacteria', u'p__Actinobacteria', u'c__Thermoleophilia', u'o__Gaiellales', u'f__Gaiellaceae', u'g__', u's__']
277	New.ReferenceOTU2435$$[u'k__Bacteria', u'p__Actinobacteria', u'c__Actinobacteria', u'o__Actinomycetales', u'f__Streptomycetaceae', u'g__Streptomyces']
278	New.ReferenceOTU1593$$[u'k__Bacteria', u'p__Actinobacteria', u'c__Actinobacteria', u'o__Actinomycetales', u'f__Nocardioidaceae', u'g__', u's__']
279	New.ReferenceOTU46$$[u'k__Bacteria', u'p__Chloroflexi', u'c__Anaerolineae', u'o__H39', u'f__', u'g__', u's__']
280	New.ReferenceOTU1632$$[u'k__Bacteria', u'p__Acidobacteria', u'c__Acidobacteria-6', u'o__iii1-15', u'f__', u'g__', u's__']
281	New.ReferenceOTU1703$$[u'k__Bacteria', u'p__Fibrobacteres', u'c__Fibrobacteria', u'o__258ds10', u'f__', u'g__', u's__']
282	New.ReferenceOTU1706$$[u'k__Bacteria', u'p__Acidobacteria', u'c__Acidobacteria-6', u'o__iii1-15', u'f__RB40', u'g__', u's__']
283	New.ReferenceOTU1709$$[u'k__Bacteria', u'p__Acidobacteria', u'c__Acidobacteria-5', u'o__', u'f__', u'g__', u's__']
284	New.ReferenceOTU1523$$[u'k__Bacteria', u'p__Nitrospirae', u'c__Nitrospira', u'o__Nitrospirales', u'f__0319-6A21', u'g__', u's__']
285	New.ReferenceOTU790$$[u'k__Bacteria', u'p__OD1', u'c__ZB2', u'o__', u'f__', u'g__', u's__']
286	New.ReferenceOTU247$$[u'k__Bacteria', u'p__Planctomycetes', u'c__OM190', u'o__agg27', u'f__', u'g__', u's__']
287	New.ReferenceOTU2379$$[u'k__Bacteria', u'p__Actinobacteria', u'c__Actinobacteria', u'o__Actinomycetales', u'f__Nocardioidaceae', u'g__', u's__']
288	New.ReferenceOTU2378$$[u'k__Bacteria', u'p__Proteobacteria', u'c__Deltaproteobacteria', u'o__Myxococcales', u'f__Haliangiaceae', u'g__', u's__']
289	New.ReferenceOTU1735$$[u'k__Bacteria', u'p__Proteobacteria', u'c__Betaproteobacteria', u'o__MND1', u'f__', u'g__', u's__']
290	New.ReferenceOTU1732$$[u'k__Bacteria', u'p__Actinobacteria', u'c__Acidimicrobiia', u'o__Acidimicrobiales', u'f__Iamiaceae', u'g__Iamia', u's__']
291	New.ReferenceOTU94$$[u'k__Bacteria', u'p__Actinobacteria', u'c__Thermoleophilia', u'o__Gaiellales', u'f__Gaiellaceae', u'g__', u's__']
292	New.ReferenceOTU1286$$[u'k__Bacteria', u'p__Proteobacteria', u'c__Alphaproteobacteria', u'o__Rhodospirillales', u'f__', u'g__', u's__']
293	New.ReferenceOTU496$$[u'k__Bacteria', u'p__Actinobacteria', u'c__Actinobacteria', u'o__Actinomycetales', u'f__Nocardiaceae', u'g__Rhodococcus', u's__']
294	New.ReferenceOTU657$$[u'k__Bacteria', u'p__Acidobacteria', u'c__Solibacteres', u'o__Solibacterales', u'f__', u'g__', u's__']
295	New.ReferenceOTU2418$$[u'k__Bacteria', u'p__Proteobacteria', u'c__Gammaproteobacteria', u'o__Legionellales', u'f__Coxiellaceae', u'g__Aquicella', u's__']
296	New.ReferenceOTU474$$[u'k__Bacteria', u'p__Planctomycetes', u'c__OM190', u'o__agg27', u'f__', u'g__', u's__']
297	New.ReferenceOTU2220$$[u'k__Bacteria', u'p__Gemmatimonadetes', u'c__Gemmatimonadetes', u'o__Gemmatimonadales', u'f__Ellin5301', u'g__', u's__']
298	New.ReferenceOTU1875$$[u'k__Bacteria', u'p__Proteobacteria', u'c__Alphaproteobacteria', u'o__Sphingomonadales', u'f__Sphingomonadaceae', u'g__Sphingobium', u's__']
299	New.ReferenceOTU82$$[u'k__Bacteria', u'p__Fibrobacteres', u'c__Fibrobacteria', u'o__258ds10', u'f__', u'g__', u's__']
300	New.ReferenceOTU1292$$[u'k__Bacteria', u'p__Chloroflexi', u'c__Ellin6529', u'o__', u'f__', u'g__', u's__']
301	New.ReferenceOTU1298$$[u'k__Bacteria', u'p__Fibrobacteres', u'c__Fibrobacteria', u'o__258ds10', u'f__', u'g__', u's__']
302	New.ReferenceOTU481$$[u'k__Bacteria', u'p__Gemmatimonadetes', u'c__Gemm-1', u'o__', u'f__', u'g__', u's__']
303	New.ReferenceOTU1616$$[u'k__Bacteria', u'p__Gemmatimonadetes', u'c__Gemmatimonadetes']
304	New.ReferenceOTU2570$$[u'k__Bacteria', u'p__Actinobacteria', u'c__Acidimicrobiia', u'o__Acidimicrobiales', u'f__EB1017', u'g__', u's__']
305	New.ReferenceOTU2579$$[u'k__Bacteria', u'p__Proteobacteria', u'c__Deltaproteobacteria', u'o__Desulfuromonadales', u'f__Geobacteraceae', u'g__Geobacter', u's__']
306	New.ReferenceOTU461$$[u'k__Bacteria', u'p__Acidobacteria', u'c__Acidobacteria-6', u'o__CCU21', u'f__', u'g__', u's__']
307	New.ReferenceOTU864$$[u'k__Bacteria', u'p__Proteobacteria', u'c__Gammaproteobacteria', u'o__Xanthomonadales', u'f__Sinobacteraceae', u'g__', u's__']
308	New.CleanUp.ReferenceOTU4393$$[u'k__Bacteria', u'p__Chloroflexi', u'c__Thermomicrobia', u'o__JG30-KF-CM45', u'f__', u'g__', u's__']
309	New.CleanUp.ReferenceOTU6903$$[u'k__Bacteria', u'p__Verrucomicrobia', u'c__[Spartobacteria]', u'o__[Chthoniobacterales]', u'f__[Chthoniobacteraceae]']
310	New.CleanUp.ReferenceOTU8480$$[u'k__Bacteria', u'p__Verrucomicrobia', u'c__[Pedosphaerae]', u'o__[Pedosphaerales]']
311	New.CleanUp.ReferenceOTU10209$$[u'k__Bacteria', u'p__Planctomycetes', u'c__Phycisphaerae', u'o__Phycisphaerales', u'f__', u'g__', u's__']
312	New.CleanUp.ReferenceOTU25490$$[u'k__Bacteria', u'p__Chloroflexi', u'c__Thermomicrobia', u'o__JG30-KF-CM45', u'f__', u'g__', u's__']
313	New.CleanUp.ReferenceOTU31525$$[u'k__Bacteria', u'p__OD1', u'c__ZB2', u'o__', u'f__', u'g__', u's__']
314	New.CleanUp.ReferenceOTU32734$$[u'k__Bacteria', u'p__Bacteroidetes']
315	New.CleanUp.ReferenceOTU33486$$[u'k__Bacteria', u'p__Proteobacteria', u'c__Alphaproteobacteria', u'o__Rhizobiales', u'f__', u'g__', u's__']
316	New.CleanUp.ReferenceOTU36877$$[u'k__Bacteria', u'p__OD1', u'c__', u'o__', u'f__', u'g__', u's__']
317	New.CleanUp.ReferenceOTU44340$$[u'k__Bacteria', u'p__Bacteroidetes', u'c__Flavobacteriia', u'o__Flavobacteriales', u'f__Flavobacteriaceae', u'g__Flavobacterium', u's__succinicans']
318	New.CleanUp.ReferenceOTU44527$$[u'k__Bacteria', u'p__Proteobacteria', u'c__Betaproteobacteria', u'o__Burkholderiales', u'f__Comamonadaceae', u'g__Methylibium']
319	New.CleanUp.ReferenceOTU46305$$[u'k__Bacteria', u'p__Gemmatimonadetes', u'c__Gemmatimonadetes', u'o__Gemmatimonadales', u'f__Ellin5301', u'g__', u's__']
320	New.CleanUp.ReferenceOTU48612$$[u'k__Bacteria', u'p__Verrucomicrobia', u'c__[Spartobacteria]', u'o__[Chthoniobacterales]', u'f__[Chthoniobacteraceae]']
321	New.CleanUp.ReferenceOTU49088$$[u'k__Bacteria', u'p__Acidobacteria', u'c__Acidobacteria-6', u'o__iii1-15', u'f__mb2424', u'g__', u's__']
322	New.CleanUp.ReferenceOTU50144$$[u'k__Bacteria', u'p__Proteobacteria', u'c__Betaproteobacteria', u'o__Burkholderiales', u'f__Comamonadaceae', u'g__Variovorax']
323	New.CleanUp.ReferenceOTU58259$$[u'k__Bacteria', u'p__OD1', u'c__ZB2', u'o__', u'f__', u'g__', u's__']
324	New.CleanUp.ReferenceOTU58412$$[u'k__Bacteria', u'p__Acidobacteria', u'c__Acidobacteria-6', u'o__iii1-15', u'f__', u'g__', u's__']
325	New.CleanUp.ReferenceOTU58607$$[u'k__Bacteria', u'p__Verrucomicrobia', u'c__Opitutae', u'o__Opitutales', u'f__Opitutaceae', u'g__Opitutus', u's__']
326	New.CleanUp.ReferenceOTU58814$$[u'k__Bacteria', u'p__Proteobacteria', u'c__Gammaproteobacteria', u'o__Xanthomonadales', u'f__Sinobacteraceae', u'g__', u's__']
327	New.CleanUp.ReferenceOTU60717$$[u'k__Bacteria', u'p__Actinobacteria', u'c__Thermoleophilia', u'o__Gaiellales', u'f__Gaiellaceae', u'g__', u's__']
328	New.CleanUp.ReferenceOTU61708$$[u'k__Bacteria', u'p__Proteobacteria', u'c__Gammaproteobacteria', u'o__Xanthomonadales', u'f__Xanthomonadaceae', u'g__', u's__']
329	New.CleanUp.ReferenceOTU75578$$[u'k__Bacteria', u'p__Verrucomicrobia', u'c__[Pedosphaerae]', u'o__[Pedosphaerales]', u'f__', u'g__', u's__']
330	New.CleanUp.ReferenceOTU76163$$[u'k__Bacteria', u'p__Verrucomicrobia', u'c__[Pedosphaerae]', u'o__[Pedosphaerales]', u'f__', u'g__', u's__']
331	New.CleanUp.ReferenceOTU79530$$[u'k__Bacteria', u'p__Proteobacteria', u'c__Alphaproteobacteria', u'o__Rhodospirillales', u'f__Rhodospirillaceae', u'g__', u's__']
332	New.CleanUp.ReferenceOTU87387$$[u'k__Bacteria', u'p__Proteobacteria', u'c__Alphaproteobacteria', u'o__Rhodobacterales', u'f__Hyphomonadaceae', u'g__', u's__']
333	New.CleanUp.ReferenceOTU88034$$[u'k__Bacteria', u'p__Proteobacteria', u'c__Betaproteobacteria', u'o__Neisseriales', u'f__Neisseriaceae', u'g__Vogesella', u's__']
334	New.CleanUp.ReferenceOTU89171$$[u'k__Bacteria', u'p__Acidobacteria', u'c__Acidobacteria-6', u'o__iii1-15', u'f__', u'g__', u's__']
335	New.CleanUp.ReferenceOTU89806$$[u'k__Bacteria', u'p__Chloroflexi', u'c__TK17', u'o__', u'f__', u'g__', u's__']
336	New.CleanUp.ReferenceOTU93451$$[u'k__Bacteria', u'p__Proteobacteria', u'c__Alphaproteobacteria', u'o__Sphingomonadales', u'f__Sphingomonadaceae', u'g__Sphingobium', u's__']
337	New.CleanUp.ReferenceOTU94190$$[u'k__Bacteria', u'p__Bacteroidetes', u'c__[Saprospirae]', u'o__[Saprospirales]', u'f__Saprospiraceae', u'g__', u's__']
338	New.CleanUp.ReferenceOTU97828$$[u'k__Bacteria', u'p__Bacteroidetes']
339	New.CleanUp.ReferenceOTU97897$$[u'k__Bacteria', u'p__Acidobacteria', u'c__Sva0725', u'o__Sva0725', u'f__', u'g__', u's__']
340	New.CleanUp.ReferenceOTU102166$$[u'k__Bacteria', u'p__Planctomycetes', u'c__OM190', u'o__agg27', u'f__', u'g__', u's__']
341	New.CleanUp.ReferenceOTU103123$$[u'k__Bacteria', u'p__Acidobacteria', u'c__Acidobacteria-6', u'o__iii1-15', u'f__', u'g__', u's__']
342	New.CleanUp.ReferenceOTU106558$$[u'k__Bacteria', u'p__Proteobacteria', u'c__Alphaproteobacteria', u'o__Rhizobiales', u'f__Hyphomicrobiaceae', u'g__Devosia', u's__']
343	New.CleanUp.ReferenceOTU107133$$[u'k__Bacteria', u'p__Proteobacteria', u'c__Gammaproteobacteria', u'o__Thiotrichales', u'f__Piscirickettsiaceae', u'g__', u's__']
344	New.CleanUp.ReferenceOTU111226$$[u'k__Bacteria', u'p__Planctomycetes', u'c__Phycisphaerae', u'o__Phycisphaerales']
345	New.CleanUp.ReferenceOTU112467$$[u'k__Bacteria', u'p__Planctomycetes', u'c__Phycisphaerae', u'o__Phycisphaerales', u'f__', u'g__', u's__']
346	New.CleanUp.ReferenceOTU115162$$[u'k__Bacteria', u'p__Proteobacteria', u'c__Betaproteobacteria', u'o__Burkholderiales', u'f__Oxalobacteraceae']
347	New.CleanUp.ReferenceOTU118391$$[u'k__Bacteria', u'p__Proteobacteria', u'c__Betaproteobacteria', u'o__SC-I-84', u'f__', u'g__', u's__']
348	New.CleanUp.ReferenceOTU118965$$[u'k__Bacteria', u'p__Chlorobi', u'c__', u'o__', u'f__', u'g__', u's__']
349	New.CleanUp.ReferenceOTU123362$$[u'k__Bacteria', u'p__Planctomycetes', u'c__Planctomycetia', u'o__Pirellulales', u'f__Pirellulaceae', u'g__', u's__']
350	New.CleanUp.ReferenceOTU128024$$[u'k__Bacteria', u'p__Armatimonadetes', u'c__[Fimbriimonadia]', u'o__[Fimbriimonadales]', u'f__[Fimbriimonadaceae]', u'g__Fimbriimonas', u's__']
351	New.CleanUp.ReferenceOTU128098$$[u'k__Bacteria', u'p__Proteobacteria', u'c__Gammaproteobacteria', u'o__Xanthomonadales', u'f__Sinobacteraceae', u'g__', u's__']
352	New.CleanUp.ReferenceOTU129608$$[u'k__Bacteria', u'p__Actinobacteria', u'c__Acidimicrobiia', u'o__Acidimicrobiales', u'f__C111', u'g__', u's__']
353	New.CleanUp.ReferenceOTU130103$$[u'k__Bacteria', u'p__Verrucomicrobia', u'c__[Spartobacteria]', u'o__[Chthoniobacterales]', u'f__[Chthoniobacteraceae]', u'g__DA101', u's__']
354	New.CleanUp.ReferenceOTU135848$$[u'k__Bacteria', u'p__Planctomycetes', u'c__Phycisphaerae', u'o__Phycisphaerales', u'f__', u'g__', u's__']
355	New.CleanUp.ReferenceOTU149507$$[u'k__Bacteria', u'p__WS3', u'c__PRR-12', u'o__LD1-PA13', u'f__', u'g__', u's__']
356	New.CleanUp.ReferenceOTU151108$$[u'k__Bacteria', u'p__Elusimicrobia', u'c__Elusimicrobia', u'o__IIb', u'f__', u'g__', u's__']
357	New.CleanUp.ReferenceOTU154485$$[u'k__Bacteria', u'p__Chloroflexi', u'c__Anaerolineae', u'o__SBR1031', u'f__A4b', u'g__', u's__']
358	New.CleanUp.ReferenceOTU155993$$[u'k__Bacteria', u'p__Verrucomicrobia', u'c__[Pedosphaerae]', u'o__[Pedosphaerales]', u'f__', u'g__', u's__']
359	New.CleanUp.ReferenceOTU157601$$[u'k__Bacteria', u'p__Proteobacteria', u'c__Deltaproteobacteria', u'o__Myxococcales', u'f__', u'g__', u's__']
360	New.CleanUp.ReferenceOTU163481$$[u'k__Bacteria', u'p__Acidobacteria', u'c__Solibacteres', u'o__Solibacterales', u'f__Solibacteraceae', u'g__Candidatus Solibacter', u's__']
361	New.CleanUp.ReferenceOTU165715$$[u'k__Bacteria', u'p__WS3', u'c__PRR-12', u'o__Sediment-1', u'f__PRR-10', u'g__', u's__']
362	New.CleanUp.ReferenceOTU165966$$[u'k__Bacteria', u'p__Planctomycetes', u'c__Planctomycetia', u'o__Gemmatales', u'f__Gemmataceae', u'g__Gemmata', u's__']
363	New.CleanUp.ReferenceOTU166126$$[u'k__Bacteria', u'p__Bacteroidetes']
364	New.CleanUp.ReferenceOTU172536$$[u'k__Bacteria', u'p__Acidobacteria', u'c__Acidobacteria-6', u'o__iii1-15', u'f__', u'g__', u's__']
365	New.CleanUp.ReferenceOTU182794$$[u'k__Bacteria', u'p__Planctomycetes', u'c__OM190', u'o__agg27', u'f__', u'g__', u's__']
366	New.CleanUp.ReferenceOTU186110$$[u'k__Bacteria', u'p__Proteobacteria', u'c__Betaproteobacteria', u'o__A21b', u'f__UD5', u'g__', u's__']
367	New.CleanUp.ReferenceOTU187015$$[u'k__Bacteria', u'p__Planctomycetes', u'c__', u'o__', u'f__', u'g__', u's__']
368	New.CleanUp.ReferenceOTU187022$$[u'k__Bacteria', u'p__Proteobacteria', u'c__Alphaproteobacteria', u'o__Sphingomonadales']
369	New.CleanUp.ReferenceOTU189236$$[u'k__Bacteria', u'p__Firmicutes', u'c__Bacilli', u'o__Bacillales', u'f__Paenibacillaceae', u'g__Paenibacillus', u's__']
370	New.CleanUp.ReferenceOTU193544$$[u'k__Bacteria', u'p__Proteobacteria', u'c__Gammaproteobacteria', u'o__Xanthomonadales', u'f__Xanthomonadaceae', u'g__', u's__']
371	New.CleanUp.ReferenceOTU194555$$[u'k__Bacteria', u'p__Bacteroidetes', u'c__Sphingobacteriia', u'o__Sphingobacteriales', u'f__', u'g__', u's__']
372	New.CleanUp.ReferenceOTU196567$$[u'k__Bacteria', u'p__Bacteroidetes', u'c__Cytophagia', u'o__Cytophagales', u'f__Cytophagaceae', u'g__', u's__']
373	New.CleanUp.ReferenceOTU197173$$[u'k__Bacteria', u'p__Actinobacteria', u'c__Actinobacteria', u'o__Actinomycetales', u'f__Mycobacteriaceae', u'g__Mycobacterium', u's__']
374	New.CleanUp.ReferenceOTU197368$$[u'k__Bacteria', u'p__Planctomycetes', u'c__Phycisphaerae', u'o__Phycisphaerales', u'f__', u'g__', u's__']
375	New.CleanUp.ReferenceOTU204101$$[u'k__Bacteria', u'p__Acidobacteria', u'c__Acidobacteria-6', u'o__CCU21', u'f__', u'g__', u's__']
376	New.CleanUp.ReferenceOTU204675$$[u'k__Bacteria', u'p__Proteobacteria', u'c__Betaproteobacteria', u'o__', u'f__', u'g__', u's__']
377	New.CleanUp.ReferenceOTU204717$$[u'k__Bacteria', u'p__Verrucomicrobia', u'c__[Pedosphaerae]', u'o__[Pedosphaerales]']
378	New.CleanUp.ReferenceOTU204817$$[u'k__Bacteria', u'p__Gemmatimonadetes', u'c__Gemmatimonadetes', u'o__Ellin5290', u'f__', u'g__', u's__']
379	New.CleanUp.ReferenceOTU206410$$[u'k__Bacteria', u'p__Proteobacteria', u'c__Deltaproteobacteria', u'o__Myxococcales', u'f__Polyangiaceae', u'g__', u's__']
380	New.CleanUp.ReferenceOTU210477$$[u'k__Bacteria', u'p__Planctomycetes', u'c__Phycisphaerae', u'o__WD2101', u'f__', u'g__', u's__']
381	New.CleanUp.ReferenceOTU212997$$[u'k__Bacteria', u'p__Proteobacteria', u'c__Alphaproteobacteria', u'o__Rhizobiales', u'f__Hyphomicrobiaceae', u'g__Rhodoplanes', u's__']
382	New.CleanUp.ReferenceOTU218090$$[u'k__Bacteria', u'p__Firmicutes', u'c__Clostridia', u'o__Clostridiales', u'f__Veillonellaceae']
383	New.CleanUp.ReferenceOTU224362$$[u'k__Bacteria', u'p__Proteobacteria']
384	New.CleanUp.ReferenceOTU230093$$[u'k__Bacteria', u'p__OD1']
385	New.CleanUp.ReferenceOTU231139$$[u'k__Bacteria', u'p__Proteobacteria', u'c__Betaproteobacteria', u'o__Rhodocyclales', u'f__Rhodocyclaceae', u'g__Zoogloea', u's__']
386	New.CleanUp.ReferenceOTU232859$$[u'k__Bacteria', u'p__Chloroflexi', u'c__Anaerolineae', u'o__A31', u'f__S47', u'g__', u's__']
387	New.CleanUp.ReferenceOTU233591$$[u'k__Bacteria', u'p__Actinobacteria', u'c__Thermoleophilia', u'o__Solirubrobacterales', u'f__Solirubrobacteraceae', u'g__', u's__']
388	New.CleanUp.ReferenceOTU237513$$[u'k__Bacteria', u'p__Proteobacteria', u'c__Betaproteobacteria', u'o__Rhodocyclales', u'f__Rhodocyclaceae']
389	New.CleanUp.ReferenceOTU241083$$[u'k__Bacteria', u'p__Nitrospirae', u'c__Nitrospira', u'o__Nitrospirales', u'f__0319-6A21', u'g__', u's__']
390	New.CleanUp.ReferenceOTU246108$$[u'k__Bacteria', u'p__Gemmatimonadetes', u'c__Gemmatimonadetes']
391	New.CleanUp.ReferenceOTU252023$$[u'k__Bacteria', u'p__Verrucomicrobia', u'c__[Pedosphaerae]', u'o__[Pedosphaerales]', u'f__auto67_4W', u'g__', u's__']
392	New.CleanUp.ReferenceOTU253943$$[u'k__Bacteria', u'p__Planctomycetes', u'c__Planctomycetia', u'o__Gemmatales', u'f__Gemmataceae', u'g__', u's__']
393	New.CleanUp.ReferenceOTU254708$$[u'k__Bacteria', u'p__Chloroflexi', u'c__TK17', u'o__', u'f__', u'g__', u's__']
394	New.CleanUp.ReferenceOTU259912$$[u'k__Bacteria', u'p__OD1', u'c__ZB2', u'o__', u'f__', u'g__', u's__']
395	New.CleanUp.ReferenceOTU261799$$[u'k__Bacteria', u'p__Planctomycetes', u'c__Phycisphaerae', u'o__Phycisphaerales']
396	New.CleanUp.ReferenceOTU264973$$[u'k__Bacteria', u'p__Actinobacteria', u'c__Thermoleophilia', u'o__Solirubrobacterales', u'f__Solirubrobacteraceae', u'g__Solirubrobacter', u's__']
397	New.CleanUp.ReferenceOTU269493$$[u'k__Bacteria', u'p__Bacteroidetes', u'c__[Saprospirae]', u'o__[Saprospirales]', u'f__Chitinophagaceae', u'g__Flavisolibacter', u's__']
398	New.CleanUp.ReferenceOTU270372$$[u'k__Bacteria', u'p__Verrucomicrobia', u'c__Opitutae', u'o__Opitutales', u'f__Opitutaceae', u'g__', u's__']
399	New.CleanUp.ReferenceOTU276541$$[u'k__Bacteria', u'p__Verrucomicrobia', u'c__Verrucomicrobiae', u'o__Verrucomicrobiales', u'f__Verrucomicrobiaceae', u'g__', u's__']
400	New.CleanUp.ReferenceOTU291470$$[u'k__Bacteria', u'p__Proteobacteria', u'c__Gammaproteobacteria', u'o__Xanthomonadales', u'f__Xanthomonadaceae', u'g__', u's__']
401	New.CleanUp.ReferenceOTU294724$$[u'k__Bacteria', u'p__Bacteroidetes', u'c__Sphingobacteriia', u'o__Sphingobacteriales', u'f__', u'g__', u's__']
402	New.CleanUp.ReferenceOTU303082$$[u'k__Bacteria', u'p__WS3', u'c__PRR-12', u'o__Sediment-1', u'f__PRR-10', u'g__', u's__']
403	New.CleanUp.ReferenceOTU306228$$[u'k__Bacteria', u'p__Chloroflexi', u'c__TK10', u'o__AKYG885', u'f__Dolo_23', u'g__', u's__']
404	New.CleanUp.ReferenceOTU311127$$[u'k__Bacteria', u'p__Proteobacteria', u'c__Alphaproteobacteria', u'o__Rhodospirillales', u'f__Rhodospirillaceae', u'g__Magnetospirillum', u's__']
405	New.CleanUp.ReferenceOTU317170$$[u'k__Bacteria', u'p__Acidobacteria', u'c__Solibacteres', u'o__Solibacterales', u'f__', u'g__', u's__']
406	New.CleanUp.ReferenceOTU318868$$[u'k__Bacteria', u'p__Actinobacteria', u'c__Acidimicrobiia', u'o__Acidimicrobiales', u'f__', u'g__', u's__']
407	New.CleanUp.ReferenceOTU321177$$[u'k__Bacteria', u'p__Verrucomicrobia', u'c__Opitutae', u'o__Opitutales', u'f__Opitutaceae', u'g__', u's__']
408	New.CleanUp.ReferenceOTU329409$$[u'k__Bacteria', u'p__Firmicutes', u'c__Clostridia', u'o__Clostridiales', u'f__Clostridiaceae', u'g__Caloramator', u's__']
409	New.CleanUp.ReferenceOTU330192$$[u'k__Bacteria', u'p__Proteobacteria', u'c__Alphaproteobacteria', u'o__BD7-3', u'f__', u'g__', u's__']
410	New.CleanUp.ReferenceOTU336417$$[u'k__Bacteria', u'p__Bacteroidetes', u'c__[Saprospirae]', u'o__[Saprospirales]', u'f__Chitinophagaceae', u'g__', u's__']
411	New.CleanUp.ReferenceOTU337107$$[u'k__Bacteria', u'p__Proteobacteria', u'c__Alphaproteobacteria', u'o__Rhizobiales']
412	New.CleanUp.ReferenceOTU337346$$[u'k__Bacteria', u'p__Verrucomicrobia', u'c__[Pedosphaerae]', u'o__[Pedosphaerales]', u'f__', u'g__', u's__']
413	New.CleanUp.ReferenceOTU341355$$[u'k__Bacteria', u'p__Proteobacteria', u'c__Alphaproteobacteria', u'o__Rhodobacterales', u'f__Hyphomonadaceae', u'g__', u's__']
414	New.CleanUp.ReferenceOTU343222$$[u'k__Bacteria', u'p__Proteobacteria', u'c__Deltaproteobacteria', u'o__Desulfuromonadales', u'f__Geobacteraceae', u'g__Geobacter', u's__']
415	New.CleanUp.ReferenceOTU346849$$[u'k__Bacteria', u'p__Verrucomicrobia', u'c__[Pedosphaerae]', u'o__[Pedosphaerales]', u'f__Ellin517', u'g__', u's__']
416	New.CleanUp.ReferenceOTU357394$$[u'k__Bacteria', u'p__Planctomycetes', u'c__Planctomycetia', u'o__Gemmatales', u'f__Gemmataceae', u'g__Gemmata', u's__']
417	New.CleanUp.ReferenceOTU359005$$[u'k__Bacteria', u'p__Acidobacteria', u'c__iii1-8', u'o__DS-18', u'f__', u'g__', u's__']
418	New.CleanUp.ReferenceOTU360187$$[u'k__Bacteria', u'p__Proteobacteria', u'c__Alphaproteobacteria', u'o__Rhizobiales', u'f__Hyphomicrobiaceae', u'g__Pedomicrobium', u's__']
419	New.CleanUp.ReferenceOTU364613$$[u'k__Bacteria', u'p__OD1', u'c__ZB2', u'o__', u'f__', u'g__', u's__']
420	New.CleanUp.ReferenceOTU366853$$[u'k__Bacteria', u'p__Acidobacteria', u'c__Acidobacteria-6', u'o__iii1-15', u'f__', u'g__', u's__']
421	New.CleanUp.ReferenceOTU371096$$[u'k__Bacteria', u'p__Proteobacteria', u'c__Alphaproteobacteria', u'o__Rhizobiales', u'f__Bradyrhizobiaceae']
422	New.CleanUp.ReferenceOTU381716$$[u'k__Bacteria', u'p__Proteobacteria', u'c__Alphaproteobacteria', u'o__Rhodospirillales', u'f__Rhodospirillaceae', u'g__Azospirillum', u's__']
423	New.CleanUp.ReferenceOTU384466$$[u'k__Bacteria', u'p__OD1', u'c__ZB2', u'o__', u'f__', u'g__', u's__']
424	New.CleanUp.ReferenceOTU385875$$[u'k__Bacteria', u'p__Proteobacteria', u'c__Betaproteobacteria', u'o__', u'f__', u'g__', u's__']
425	New.CleanUp.ReferenceOTU390089$$[u'k__Bacteria', u'p__Proteobacteria', u'c__Deltaproteobacteria', u'o__Myxococcales', u'f__Polyangiaceae', u'g__Aetherobacter', u's__fasciculatus']
426	New.CleanUp.ReferenceOTU391543$$[u'k__Bacteria', u'p__Verrucomicrobia', u'c__Opitutae', u'o__Opitutales', u'f__Opitutaceae', u'g__Opitutus', u's__']
427	New.CleanUp.ReferenceOTU401762$$[u'k__Bacteria', u'p__Actinobacteria', u'c__Actinobacteria', u'o__Actinomycetales', u'f__Thermomonosporaceae', u'g__Actinomadura', u's__vinacea']
428	New.CleanUp.ReferenceOTU402242$$[u'k__Bacteria', u'p__Proteobacteria', u'c__Alphaproteobacteria', u'o__Rhizobiales', u'f__Hyphomicrobiaceae', u'g__Rhodoplanes', u's__']
429	New.CleanUp.ReferenceOTU403289$$[u'k__Bacteria', u'p__Acidobacteria', u'c__Solibacteres', u'o__Solibacterales', u'f__', u'g__', u's__']
430	New.CleanUp.ReferenceOTU405354$$[u'k__Bacteria', u'p__Actinobacteria', u'c__MB-A2-108', u'o__0319-7L14', u'f__', u'g__', u's__']
431	New.CleanUp.ReferenceOTU405544$$[u'k__Bacteria', u'p__Planctomycetes', u'c__OM190', u'o__agg27', u'f__', u'g__', u's__']
432	New.CleanUp.ReferenceOTU410472$$[u'k__Bacteria', u'p__Verrucomicrobia', u'c__[Spartobacteria]', u'o__[Chthoniobacterales]', u'f__[Chthoniobacteraceae]', u'g__', u's__']
433	New.CleanUp.ReferenceOTU413279$$[u'k__Bacteria', u'p__Proteobacteria', u'c__Deltaproteobacteria', u'o__Desulfuromonadales', u'f__Geobacteraceae', u'g__Geobacter', u's__']
434	New.CleanUp.ReferenceOTU418675$$[u'k__Bacteria', u'p__Acidobacteria', u'c__Acidobacteria-6', u'o__iii1-15', u'f__RB40', u'g__', u's__']
435	New.CleanUp.ReferenceOTU421021$$[u'k__Bacteria', u'p__Chloroflexi', u'c__Ellin6529', u'o__', u'f__', u'g__', u's__']
436	New.CleanUp.ReferenceOTU422882$$[u'k__Bacteria', u'p__Planctomycetes', u'c__Phycisphaerae', u'o__CPla-3', u'f__', u'g__', u's__']
437	New.CleanUp.ReferenceOTU424531$$[u'k__Bacteria', u'p__Planctomycetes', u'c__Planctomycetia', u'o__Pirellulales', u'f__Pirellulaceae', u'g__', u's__']
438	New.CleanUp.ReferenceOTU424957$$[u'k__Bacteria', u'p__OD1', u'c__ZB2', u'o__', u'f__', u'g__', u's__']
439	New.CleanUp.ReferenceOTU430297$$[u'k__Bacteria', u'p__WS3', u'c__PRR-12', u'o__LD1-PA13', u'f__', u'g__', u's__']
440	New.CleanUp.ReferenceOTU434627$$[u'k__Bacteria', u'p__Proteobacteria', u'c__Gammaproteobacteria', u'o__Xanthomonadales', u'f__Sinobacteraceae', u'g__', u's__']
441	New.CleanUp.ReferenceOTU437960$$[u'k__Bacteria', u'p__OD1', u'c__ZB2', u'o__', u'f__', u'g__', u's__']
442	New.CleanUp.ReferenceOTU443300$$[u'k__Bacteria', u'p__Planctomycetes', u'c__Planctomycetia', u'o__Gemmatales', u'f__Gemmataceae', u'g__', u's__']
443	New.CleanUp.ReferenceOTU446146$$[u'k__Bacteria', u'p__Proteobacteria', u'c__Gammaproteobacteria', u'o__Xanthomonadales', u'f__Xanthomonadaceae']
444	New.CleanUp.ReferenceOTU459927$$[u'k__Bacteria', u'p__Planctomycetes', u'c__Planctomycetia', u'o__Gemmatales', u'f__Gemmataceae', u'g__', u's__']
445	New.CleanUp.ReferenceOTU462230$$[u'k__Bacteria', u'p__Fibrobacteres', u'c__Fibrobacteria', u'o__258ds10', u'f__', u'g__', u's__']
446	New.CleanUp.ReferenceOTU474224$$[u'k__Bacteria', u'p__Acidobacteria', u'c__Acidobacteria-6']
447	New.CleanUp.ReferenceOTU478376$$[u'k__Bacteria', u'p__OD1', u'c__ZB2', u'o__', u'f__', u'g__', u's__']
448	New.CleanUp.ReferenceOTU481774$$[u'k__Bacteria', u'p__Acidobacteria', u'c__Solibacteres', u'o__Solibacterales', u'f__', u'g__', u's__']
449	New.CleanUp.ReferenceOTU487084$$[u'k__Bacteria', u'p__Elusimicrobia', u'c__Elusimicrobia', u'o__IIb', u'f__', u'g__', u's__']
450	New.CleanUp.ReferenceOTU494357$$[u'k__Bacteria', u'p__OD1', u'c__ZB2', u'o__', u'f__', u'g__', u's__']
451	New.CleanUp.ReferenceOTU496720$$[u'k__Bacteria', u'p__OD1', u'c__ZB2', u'o__', u'f__', u'g__', u's__']
452	New.CleanUp.ReferenceOTU499608$$[u'k__Bacteria', u'p__Proteobacteria', u'c__Betaproteobacteria', u'o__Rhodocyclales', u'f__Rhodocyclaceae']
453	New.CleanUp.ReferenceOTU502345$$[u'k__Bacteria', u'p__Acidobacteria', u'c__Acidobacteria-6', u'o__iii1-15', u'f__RB40', u'g__', u's__']
454	New.CleanUp.ReferenceOTU504882$$[u'k__Bacteria', u'p__TM7', u'c__TM7-1', u'o__', u'f__', u'g__', u's__']
455	New.CleanUp.ReferenceOTU505859$$[u'k__Bacteria', u'p__Proteobacteria', u'c__Deltaproteobacteria', u'o__Desulfuromonadales', u'f__Geobacteraceae', u'g__Geobacter', u's__']
456	New.CleanUp.ReferenceOTU512412$$[u'k__Bacteria', u'p__Proteobacteria', u'c__Betaproteobacteria', u'o__MND1', u'f__', u'g__', u's__']
457	New.CleanUp.ReferenceOTU513523$$[u'k__Bacteria', u'p__Proteobacteria', u'c__Deltaproteobacteria', u'o__Myxococcales', u'f__Cystobacteraceae']
458	New.CleanUp.ReferenceOTU514058$$[u'k__Bacteria', u'p__Chloroflexi', u'c__Ellin6529', u'o__', u'f__', u'g__', u's__']
459	New.CleanUp.ReferenceOTU517095$$[u'k__Bacteria', u'p__Fibrobacteres', u'c__Fibrobacteria', u'o__258ds10', u'f__', u'g__', u's__']
460	New.CleanUp.ReferenceOTU519814$$[u'k__Bacteria', u'p__OD1']
461	New.CleanUp.ReferenceOTU522469$$[u'k__Bacteria', u'p__Spirochaetes', u'c__[Leptospirae]', u'o__[Leptospirales]', u'f__Leptospiraceae', u'g__Turneriella', u's__']
462	New.CleanUp.ReferenceOTU523848$$[u'k__Bacteria', u'p__Chloroflexi', u'c__Ellin6529', u'o__', u'f__', u'g__', u's__']
463	New.CleanUp.ReferenceOTU526510$$[u'k__Bacteria', u'p__Proteobacteria', u'c__Betaproteobacteria', u'o__', u'f__', u'g__', u's__']
464	New.CleanUp.ReferenceOTU529467$$[u'k__Bacteria', u'p__Chlorobi', u'c__', u'o__', u'f__', u'g__', u's__']
465	New.CleanUp.ReferenceOTU532456$$[u'k__Bacteria', u'p__Planctomycetes', u'c__Planctomycetia', u'o__Pirellulales', u'f__Pirellulaceae', u'g__Pirellula', u's__']
466	New.CleanUp.ReferenceOTU537131$$[u'k__Bacteria', u'p__Proteobacteria', u'c__Betaproteobacteria', u'o__Ellin6067', u'f__', u'g__', u's__']
467	New.CleanUp.ReferenceOTU542570$$[u'k__Bacteria', u'p__Chloroflexi', u'c__Anaerolineae', u'o__envOPS12', u'f__', u'g__', u's__']
468	New.CleanUp.ReferenceOTU543255$$[u'k__Bacteria', u'p__Proteobacteria', u'c__Deltaproteobacteria', u'o__Desulfuromonadales', u'f__Geobacteraceae', u'g__Geobacter', u's__']
469	New.CleanUp.ReferenceOTU546300$$[u'k__Bacteria', u'p__Proteobacteria', u'c__Gammaproteobacteria', u'o__Xanthomonadales', u'f__Sinobacteraceae', u'g__', u's__']
470	New.CleanUp.ReferenceOTU551929$$[u'k__Bacteria', u'p__Gemmatimonadetes', u'c__Gemmatimonadetes', u'o__N1423WL', u'f__', u'g__', u's__']
471	New.CleanUp.ReferenceOTU552182$$[u'k__Bacteria', u'p__Bacteroidetes', u'c__Cytophagia', u'o__Cytophagales', u'f__Cytophagaceae', u'g__', u's__']
472	New.CleanUp.ReferenceOTU555110$$[u'k__Bacteria', u'p__Proteobacteria', u'c__Alphaproteobacteria', u'o__Rhodospirillales', u'f__', u'g__', u's__']
473	New.CleanUp.ReferenceOTU555891$$[u'k__Bacteria', u'p__Proteobacteria', u'c__Alphaproteobacteria', u'o__Rhodospirillales', u'f__Rhodospirillaceae', u'g__', u's__']
474	New.CleanUp.ReferenceOTU557171$$[u'k__Bacteria', u'p__Planctomycetes', u'c__Phycisphaerae', u'o__WD2101', u'f__', u'g__', u's__']
475	New.CleanUp.ReferenceOTU558264$$[u'k__Bacteria', u'p__Actinobacteria', u'c__Acidimicrobiia', u'o__Acidimicrobiales', u'f__C111', u'g__', u's__']
476	New.CleanUp.ReferenceOTU559639$$[u'k__Bacteria', u'p__Actinobacteria', u'c__Acidimicrobiia', u'o__Acidimicrobiales', u'f__', u'g__', u's__']
477	New.CleanUp.ReferenceOTU563341$$[u'k__Bacteria', u'p__Planctomycetes', u'c__OM190', u'o__agg27', u'f__', u'g__', u's__']
478	New.CleanUp.ReferenceOTU575397$$[u'k__Bacteria', u'p__Proteobacteria', u'c__Betaproteobacteria', u'o__Burkholderiales', u'f__Comamonadaceae']
479	New.CleanUp.ReferenceOTU578345$$[u'k__Bacteria', u'p__Proteobacteria', u'c__Deltaproteobacteria', u'o__Desulfuromonadales', u'f__Geobacteraceae', u'g__Geobacter', u's__']
480	New.CleanUp.ReferenceOTU579894$$[u'k__Bacteria', u'p__Proteobacteria', u'c__Betaproteobacteria', u'o__MND1', u'f__', u'g__', u's__']
481	New.CleanUp.ReferenceOTU580465$$[u'k__Bacteria', u'p__Proteobacteria', u'c__Deltaproteobacteria', u'o__Myxococcales', u'f__OM27', u'g__', u's__']
482	New.CleanUp.ReferenceOTU592418$$[u'k__Archaea', u'p__Crenarchaeota', u'c__Thaumarchaeota', u'o__Nitrososphaerales', u'f__Nitrososphaeraceae', u'g__Candidatus Nitrososphaera', u's__SCA1170']
483	New.CleanUp.ReferenceOTU593074$$[u'k__Bacteria', u'p__Proteobacteria', u'c__Alphaproteobacteria', u'o__', u'f__', u'g__', u's__']
484	New.CleanUp.ReferenceOTU594833$$[u'k__Bacteria', u'p__Planctomycetes', u'c__C6', u'o__MVS-107', u'f__', u'g__', u's__']
485	New.CleanUp.ReferenceOTU598278$$[u'k__Bacteria', u'p__Proteobacteria', u'c__Alphaproteobacteria', u'o__Rhodospirillales']
486	New.CleanUp.ReferenceOTU599401$$[u'k__Bacteria', u'p__Chloroflexi', u'c__Anaerolineae', u'o__H39', u'f__', u'g__', u's__']
487	New.CleanUp.ReferenceOTU605643$$[u'k__Bacteria', u'p__Bacteroidetes', u'c__Flavobacteriia', u'o__Flavobacteriales', u'f__Flavobacteriaceae', u'g__Flavobacterium', u's__']
488	New.CleanUp.ReferenceOTU614425$$[u'k__Bacteria', u'p__Proteobacteria', u'c__Alphaproteobacteria', u'o__Rhizobiales', u'f__Beijerinckiaceae', u'g__', u's__']
489	New.CleanUp.ReferenceOTU615767$$[u'k__Bacteria', u'p__Bacteroidetes', u'c__[Saprospirae]', u'o__[Saprospirales]', u'f__Chitinophagaceae', u'g__', u's__']
490	New.CleanUp.ReferenceOTU624755$$[u'k__Bacteria', u'p__Verrucomicrobia', u'c__Verrucomicrobiae', u'o__Verrucomicrobiales', u'f__Verrucomicrobiaceae', u'g__Luteolibacter', u's__']
491	New.CleanUp.ReferenceOTU627533$$[u'k__Bacteria', u'p__Proteobacteria', u'c__Alphaproteobacteria', u'o__Rhodobacterales', u'f__Rhodobacteraceae', u'g__Amaricoccus', u's__']
492	New.CleanUp.ReferenceOTU637665$$[u'k__Bacteria', u'p__Proteobacteria', u'c__Deltaproteobacteria', u'o__Myxococcales', u'f__OM27', u'g__', u's__']
493	New.CleanUp.ReferenceOTU639453$$[u'k__Bacteria', u'p__Actinobacteria', u'c__Thermoleophilia', u'o__Solirubrobacterales', u'f__', u'g__', u's__']
494	New.CleanUp.ReferenceOTU641404$$[u'k__Bacteria', u'p__Proteobacteria', u'c__Gammaproteobacteria', u'o__Xanthomonadales', u'f__Xanthomonadaceae']
495	New.CleanUp.ReferenceOTU645127$$[u'k__Bacteria', u'p__Chloroflexi', u'c__Thermomicrobia', u'o__AKYG1722', u'f__', u'g__', u's__']
496	New.CleanUp.ReferenceOTU647524$$[u'k__Bacteria', u'p__OD1', u'c__ZB2', u'o__', u'f__', u'g__', u's__']
497	New.CleanUp.ReferenceOTU648396$$[u'k__Bacteria', u'p__Acidobacteria', u'c__[Chloracidobacteria]', u'o__DS-100', u'f__', u'g__', u's__']
498	New.CleanUp.ReferenceOTU655132$$[u'k__Bacteria', u'p__Firmicutes', u'c__Clostridia', u'o__Clostridiales', u'f__Clostridiaceae', u'g__Clostridium']
499	New.CleanUp.ReferenceOTU660118$$[u'k__Bacteria', u'p__Bacteroidetes', u'c__Bacteroidia', u'o__Bacteroidales', u'f__', u'g__', u's__']
500	New.CleanUp.ReferenceOTU667307$$[u'k__Bacteria', u'p__Proteobacteria', u'c__Betaproteobacteria', u'o__Rhodocyclales', u'f__Rhodocyclaceae']
501	New.CleanUp.ReferenceOTU668115$$[u'k__Bacteria', u'p__Planctomycetes', u'c__Phycisphaerae', u'o__WD2101', u'f__', u'g__', u's__']
502	New.CleanUp.ReferenceOTU668688$$[u'k__Bacteria', u'p__Proteobacteria', u'c__Alphaproteobacteria', u'o__Rhodospirillales', u'f__', u'g__', u's__']
503	New.CleanUp.ReferenceOTU671485$$[u'k__Bacteria', u'p__Proteobacteria', u'c__Betaproteobacteria', u'o__', u'f__', u'g__', u's__']
504	New.CleanUp.ReferenceOTU675956$$[u'k__Bacteria', u'p__Acidobacteria', u'c__Acidobacteria-5', u'o__', u'f__', u'g__', u's__']
505	New.CleanUp.ReferenceOTU677266$$[u'k__Bacteria', u'p__OD1', u'c__ZB2', u'o__', u'f__', u'g__', u's__']
506	New.CleanUp.ReferenceOTU679880$$[u'k__Bacteria', u'p__Planctomycetes', u'c__Planctomycetia', u'o__Pirellulales', u'f__Pirellulaceae']
507	New.CleanUp.ReferenceOTU688643$$[u'k__Bacteria', u'p__Proteobacteria', u'c__Betaproteobacteria', u'o__Burkholderiales', u'f__Comamonadaceae']
508	New.CleanUp.ReferenceOTU689850$$[u'k__Bacteria', u'p__Proteobacteria', u'c__Deltaproteobacteria', u'o__Myxococcales']
509	New.CleanUp.ReferenceOTU698525$$[u'k__Bacteria', u'p__Chlamydiae', u'c__Chlamydiia', u'o__Chlamydiales', u'f__', u'g__', u's__']
510	New.CleanUp.ReferenceOTU706183$$[u'k__Bacteria', u'p__Acidobacteria', u'c__Sva0725', u'o__Sva0725', u'f__', u'g__', u's__']
511	New.CleanUp.ReferenceOTU706339$$[u'k__Bacteria', u'p__OD1', u'c__ZB2', u'o__', u'f__', u'g__', u's__']
512	New.CleanUp.ReferenceOTU712078$$[u'k__Bacteria', u'p__Proteobacteria', u'c__Betaproteobacteria', u'o__Rhodocyclales', u'f__Rhodocyclaceae', u'g__Dechloromonas', u's__']
513	New.CleanUp.ReferenceOTU720635$$[u'k__Bacteria', u'p__Proteobacteria', u'c__Betaproteobacteria', u'o__MND1', u'f__', u'g__', u's__']
514	New.CleanUp.ReferenceOTU722061$$[u'k__Bacteria', u'p__Proteobacteria', u'c__Gammaproteobacteria', u'o__Xanthomonadales', u'f__Xanthomonadaceae', u'g__', u's__']
515	New.CleanUp.ReferenceOTU726255$$[u'k__Bacteria', u'p__Actinobacteria', u'c__Acidimicrobiia', u'o__Acidimicrobiales', u'f__C111', u'g__', u's__']
516	New.CleanUp.ReferenceOTU734491$$[u'k__Bacteria', u'p__Fibrobacteres', u'c__Fibrobacteria', u'o__258ds10', u'f__', u'g__', u's__']
517	New.CleanUp.ReferenceOTU740641$$[u'k__Bacteria', u'p__Verrucomicrobia', u'c__[Pedosphaerae]', u'o__[Pedosphaerales]']
518	New.CleanUp.ReferenceOTU743235$$[u'k__Bacteria', u'p__Actinobacteria', u'c__Actinobacteria', u'o__Actinomycetales', u'f__Nocardioidaceae', u'g__Aeromicrobium', u's__']
519	New.CleanUp.ReferenceOTU747095$$[u'k__Bacteria', u'p__Proteobacteria', u'c__Gammaproteobacteria', u'o__Xanthomonadales', u'f__Xanthomonadaceae', u'g__', u's__']
520	New.CleanUp.ReferenceOTU750579$$[u'k__Bacteria', u'p__Acidobacteria', u'c__Sva0725', u'o__Sva0725', u'f__', u'g__', u's__']
521	New.CleanUp.ReferenceOTU755723$$[u'k__Bacteria', u'p__OD1', u'c__', u'o__', u'f__', u'g__', u's__']
522	112045$$[u'k__Bacteria', u'p__Actinobacteria', u'c__Thermoleophilia', u'o__Solirubrobacterales', u'f__Solirubrobacteraceae']
523	826124$$[u'k__Bacteria', u'p__Proteobacteria', u'c__Alphaproteobacteria', u'o__Caulobacterales', u'f__Caulobacteraceae', u'g__Phenylobacterium', u's__']
524	558911$$[u'k__Bacteria', u'p__Actinobacteria', u'c__Actinobacteria', u'o__Actinomycetales', u'f__Nocardioidaceae', u'g__Kribbella', u's__']
525	4437903$$[u'k__Bacteria', u'p__Proteobacteria', u'c__Gammaproteobacteria', u'o__Xanthomonadales', u'f__Sinobacteraceae', u'g__', u's__']
526	552186$$[u'k__Bacteria', u'p__Verrucomicrobia', u'c__[Pedosphaerae]', u'o__[Pedosphaerales]', u'f__', u'g__', u's__']
527	890073$$[u'k__Bacteria', u'p__Proteobacteria', u'c__Alphaproteobacteria', u'o__Rhizobiales', u'f__Bradyrhizobiaceae', u'g__Balneimonas', u's__']
528	114151$$[u'k__Bacteria', u'p__Actinobacteria', u'c__Actinobacteria', u'o__Actinomycetales', u'f__Micromonosporaceae', u'g__Pilimelia', u's__']
529	1692229$$[u'k__Bacteria', u'p__Chloroflexi', u'c__Ellin6529', u'o__', u'f__', u'g__', u's__']
530	133467$$[u'k__Bacteria', u'p__Actinobacteria', u'c__Actinobacteria', u'o__Actinomycetales', u'f__Intrasporangiaceae']
531	4461996$$[u'k__Bacteria', u'p__Proteobacteria', u'c__Alphaproteobacteria', u'o__Rhodospirillales', u'f__Rhodospirillaceae', u'g__', u's__']
532	1716532$$[u'k__Bacteria', u'p__Proteobacteria', u'c__Deltaproteobacteria', u'o__Myxococcales', u'f__Haliangiaceae', u'g__', u's__']
533	244494$$[u'k__Bacteria', u'p__Actinobacteria', u'c__Actinobacteria', u'o__Actinomycetales', u'f__Pseudonocardiaceae', u'g__Pseudonocardia', u's__']
534	1106926$$[u'k__Bacteria', u'p__Planctomycetes', u'c__Planctomycetia', u'o__Pirellulales', u'f__Pirellulaceae', u'g__Pirellula', u's__']
535	512364$$[u'k__Bacteria', u'p__Verrucomicrobia', u'c__[Spartobacteria]', u'o__[Chthoniobacterales]', u'f__[Chthoniobacteraceae]', u'g__DA101', u's__']
536	4302937$$[u'k__Bacteria', u'p__Proteobacteria', u'c__Alphaproteobacteria', u'o__Rhodospirillales', u'f__Rhodospirillaceae', u'g__', u's__']
537	313245$$[u'k__Bacteria', u'p__Acidobacteria', u'c__Acidobacteria-6', u'o__iii1-15', u'f__', u'g__', u's__']
538	1140993$$[u'k__Bacteria', u'p__Proteobacteria', u'c__Alphaproteobacteria', u'o__Rhizobiales']
539	798646$$[u'k__Bacteria', u'p__Acidobacteria', u'c__Acidobacteria-6', u'o__iii1-15', u'f__', u'g__', u's__']
540	1110625$$[u'k__Bacteria', u'p__Actinobacteria', u'c__Thermoleophilia', u'o__Solirubrobacterales', u'f__', u'g__', u's__']
541	222209$$[u'k__Bacteria', u'p__Proteobacteria', u'c__Alphaproteobacteria', u'o__Rhizobiales', u'f__Bradyrhizobiaceae']
542	4112171$$[u'k__Bacteria', u'p__Acidobacteria', u'c__Acidobacteria-6']
543	789730$$[u'k__Bacteria', u'p__Acidobacteria', u'c__Acidobacteriia', u'o__Acidobacteriales', u'f__Koribacteraceae', u'g__', u's__']
544	4389969$$[u'k__Bacteria', u'p__Acidobacteria', u'c__Acidobacteria-6', u'o__CCU21', u'f__', u'g__', u's__']
545	2132323$$[u'k__Bacteria', u'p__Proteobacteria', u'c__Alphaproteobacteria', u'o__Rhizobiales']
546	689528$$[u'k__Bacteria', u'p__Actinobacteria', u'c__Actinobacteria', u'o__Actinomycetales', u'f__Intrasporangiaceae']
547	4370648$$[u'k__Bacteria', u'p__Proteobacteria', u'c__Gammaproteobacteria', u'o__Xanthomonadales', u'f__Xanthomonadaceae', u'g__', u's__']
548	131766$$[u'k__Bacteria', u'p__Actinobacteria', u'c__Actinobacteria', u'o__Actinomycetales', u'f__Micrococcaceae', u'g__', u's__']
549	30134$$[u'k__Bacteria', u'p__Actinobacteria', u'c__Actinobacteria', u'o__Actinomycetales', u'f__Nocardioidaceae', u'g__', u's__']
550	453616$$[u'k__Bacteria', u'p__Actinobacteria', u'c__Actinobacteria', u'o__Actinomycetales', u'f__Geodermatophilaceae']
551	2419585$$[u'k__Bacteria', u'p__Actinobacteria', u'c__Acidimicrobiia', u'o__Acidimicrobiales', u'f__Iamiaceae', u'g__Iamia', u's__']
552	4320783$$[u'k__Bacteria', u'p__Acidobacteria', u'c__Sva0725', u'o__Sva0725', u'f__', u'g__', u's__']
553	221349$$[u'k__Bacteria', u'p__Gemmatimonadetes', u'c__Gemmatimonadetes', u'o__N1423WL', u'f__', u'g__', u's__']
554	816291$$[u'k__Bacteria', u'p__Actinobacteria', u'c__Thermoleophilia', u'o__Gaiellales', u'f__Gaiellaceae', u'g__', u's__']
555	4432889$$[u'k__Bacteria', u'p__Actinobacteria', u'c__Actinobacteria', u'o__Actinomycetales', u'f__Intrasporangiaceae']
556	191698$$[u'k__Bacteria', u'p__Actinobacteria', u'c__Actinobacteria', u'o__Actinomycetales', u'f__Mycobacteriaceae', u'g__Mycobacterium']
557	4386592$$[u'k__Bacteria', u'p__Verrucomicrobia', u'c__[Spartobacteria]', u'o__[Chthoniobacterales]', u'f__[Chthoniobacteraceae]', u'g__DA101', u's__']
558	240137$$[u'k__Bacteria', u'p__Actinobacteria', u'c__Thermoleophilia', u'o__Solirubrobacterales', u'f__Solirubrobacteraceae', u'g__', u's__']
559	754039$$[u'k__Bacteria', u'p__Proteobacteria', u'c__Alphaproteobacteria', u'o__Rhodospirillales', u'f__Rhodospirillaceae', u'g__', u's__']
560	295198$$[u'k__Bacteria', u'p__Firmicutes', u'c__Bacilli', u'o__Bacillales', u'f__Planococcaceae', u'g__Sporosarcina', u's__']
561	902334$$[u'k__Bacteria', u'p__Actinobacteria', u'c__Actinobacteria', u'o__Actinomycetales', u'f__Mycobacteriaceae', u'g__Mycobacterium', u's__']
562	834883$$[u'k__Bacteria', u'p__Actinobacteria', u'c__Actinobacteria', u'o__Actinomycetales', u'f__Propionibacteriaceae', u'g__Microlunatus', u's__']
563	575467$$[u'k__Bacteria', u'p__Proteobacteria', u'c__Betaproteobacteria', u'o__MND1', u'f__', u'g__', u's__']
564	248170$$[u'k__Bacteria', u'p__Actinobacteria', u'c__Actinobacteria', u'o__Micrococcales', u'f__', u'g__', u's__']
565	4377062$$[u'k__Bacteria', u'p__Actinobacteria', u'c__Actinobacteria', u'o__Actinomycetales', u'f__Streptomycetaceae']
566	987899$$[u'k__Bacteria', u'p__Actinobacteria', u'c__Acidimicrobiia', u'o__Acidimicrobiales', u'f__', u'g__', u's__']
567	744505$$[u'k__Bacteria', u'p__Proteobacteria', u'c__Alphaproteobacteria', u'o__Rhizobiales', u'f__Hyphomicrobiaceae', u'g__Rhodoplanes', u's__']
568	13100$$[u'k__Bacteria', u'p__Actinobacteria', u'c__Actinobacteria', u'o__Actinomycetales', u'f__Mycobacteriaceae', u'g__Mycobacterium', u's__']
569	996116$$[u'k__Bacteria', u'p__Actinobacteria', u'c__Actinobacteria', u'o__Actinomycetales', u'f__Nocardioidaceae', u'g__', u's__']
570	2195500$$[u'k__Bacteria', u'p__Proteobacteria', u'c__Gammaproteobacteria', u'o__Xanthomonadales', u'f__Xanthomonadaceae', u'g__Dokdonella', u's__']
571	854839$$[u'k__Bacteria', u'p__Proteobacteria', u'c__Betaproteobacteria', u'o__', u'f__', u'g__', u's__']
572	114102$$[u'k__Bacteria', u'p__Proteobacteria', u'c__Betaproteobacteria', u'o__Burkholderiales', u'f__Comamonadaceae', u'g__Methylibium', u's__']
573	888357$$[u'k__Bacteria', u'p__Actinobacteria', u'c__Actinobacteria', u'o__Actinomycetales', u'f__Nocardioidaceae', u'g__Nocardioides', u's__']
574	1062966$$[u'k__Bacteria', u'p__Actinobacteria', u'c__Thermoleophilia', u'o__Gaiellales', u'f__Gaiellaceae', u'g__', u's__']
575	1007384$$[u'k__Bacteria', u'p__Actinobacteria', u'c__Actinobacteria', u'o__Actinomycetales', u'f__Intrasporangiaceae']
576	254888$$[u'k__Bacteria', u'p__Proteobacteria', u'c__Betaproteobacteria', u'o__Burkholderiales', u'f__Comamonadaceae']
577	582097$$[u'k__Bacteria', u'p__Proteobacteria', u'c__Deltaproteobacteria', u'o__Syntrophobacterales', u'f__Syntrophobacteraceae', u'g__', u's__']
578	4299829$$[u'k__Bacteria', u'p__Chloroflexi', u'c__Gitt-GS-136', u'o__', u'f__', u'g__', u's__']
579	857566$$[u'k__Bacteria', u'p__Actinobacteria', u'c__Thermoleophilia', u'o__Solirubrobacterales', u'f__Patulibacteraceae', u'g__', u's__']
580	255346$$[u'k__Bacteria', u'p__Chloroflexi', u'c__Anaerolineae', u'o__CFB-26', u'f__', u'g__', u's__']
581	90701$$[u'k__Bacteria', u'p__Actinobacteria', u'c__Actinobacteria', u'o__Actinomycetales', u'f__Mycobacteriaceae', u'g__Mycobacterium', u's__']
582	4433512$$[u'k__Bacteria', u'p__Chloroflexi', u'c__Ellin6529', u'o__', u'f__', u'g__', u's__']
583	4402996$$[u'k__Bacteria', u'p__Acidobacteria', u'c__RB25', u'o__', u'f__', u'g__', u's__']
584	360097$$[u'k__Bacteria', u'p__Acidobacteria', u'c__Acidobacteria-6', u'o__iii1-15', u'f__RB40', u'g__', u's__']
585	298853$$[u'k__Bacteria', u'p__Firmicutes', u'c__Bacilli', u'o__Bacillales', u'f__Planococcaceae']
586	577309$$[u'k__Bacteria', u'p__Proteobacteria', u'c__Deltaproteobacteria', u'o__Myxococcales', u'f__Haliangiaceae', u'g__', u's__']
587	1113185$$[u'k__Bacteria', u'p__Actinobacteria', u'c__Actinobacteria', u'o__Actinomycetales', u'f__Streptomycetaceae']
588	869089$$[u'k__Bacteria', u'p__Actinobacteria', u'c__Actinobacteria', u'o__Actinomycetales', u'f__Sporichthyaceae', u'g__', u's__']
589	132101$$[u'k__Bacteria', u'p__Actinobacteria', u'c__Actinobacteria', u'o__Actinomycetales', u'f__Intrasporangiaceae']
590	52053$$[u'k__Bacteria', u'p__Proteobacteria', u'c__Alphaproteobacteria', u'o__Rhizobiales', u'f__Hyphomicrobiaceae', u'g__Rhodoplanes', u's__']
591	354851$$[u'k__Bacteria', u'p__Actinobacteria', u'c__Actinobacteria', u'o__Actinomycetales', u'f__Mycobacteriaceae', u'g__Mycobacterium', u's__']
592	New.ReferenceOTU2509$$[u'k__Bacteria', u'p__Proteobacteria', u'c__Betaproteobacteria', u'o__Ellin6067', u'f__', u'g__', u's__']
593	New.ReferenceOTU2217$$[u'k__Bacteria', u'p__Acidobacteria', u'c__Acidobacteria-6', u'o__iii1-15', u'f__', u'g__', u's__']
594	New.ReferenceOTU2692$$[u'k__Bacteria', u'p__Actinobacteria', u'c__Actinobacteria', u'o__Actinomycetales', u'f__Streptomycetaceae', u'g__Streptomyces', u's__mirabilis']
595	New.ReferenceOTU2031$$[u'k__Bacteria', u'p__Acidobacteria', u'c__Acidobacteria-6', u'o__iii1-15', u'f__', u'g__', u's__']
596	New.ReferenceOTU2335$$[u'k__Bacteria', u'p__Proteobacteria', u'c__Alphaproteobacteria', u'o__Rhodospirillales', u'f__Acetobacteraceae']
597	New.ReferenceOTU2520$$[u'k__Bacteria', u'p__Proteobacteria', u'c__Gammaproteobacteria', u'o__Xanthomonadales', u'f__Sinobacteraceae', u'g__', u's__']
598	New.ReferenceOTU128$$[u'k__Bacteria', u'p__Firmicutes', u'c__Bacilli', u'o__Bacillales', u'f__Staphylococcaceae', u'g__Staphylococcus']
599	New.ReferenceOTU1211$$[u'k__Bacteria', u'p__Acidobacteria', u'c__Acidobacteria-6', u'o__iii1-15', u'f__', u'g__', u's__']
600	New.ReferenceOTU1253$$[u'k__Bacteria', u'p__Proteobacteria', u'c__Gammaproteobacteria', u'o__Pseudomonadales', u'f__Pseudomonadaceae', u'g__Pseudomonas']
601	New.ReferenceOTU731$$[u'k__Bacteria', u'p__Acidobacteria', u'c__Acidobacteria-6', u'o__iii1-15', u'f__', u'g__', u's__']
602	New.ReferenceOTU134$$[u'k__Bacteria', u'p__Acidobacteria', u'c__Acidobacteria-6', u'o__iii1-15', u'f__', u'g__', u's__']
603	New.ReferenceOTU2008$$[u'k__Bacteria', u'p__Acidobacteria', u'c__Acidobacteria-6', u'o__iii1-15', u'f__RB40', u'g__', u's__']
604	New.ReferenceOTU638$$[u'k__Bacteria', u'p__Proteobacteria', u'c__Gammaproteobacteria', u'o__Pseudomonadales', u'f__Pseudomonadaceae', u'g__Pseudomonas']
605	New.ReferenceOTU2481$$[u'k__Bacteria', u'p__Actinobacteria', u'c__Actinobacteria', u'o__Actinomycetales', u'f__Pseudonocardiaceae', u'g__Pseudonocardia', u's__']
606	New.ReferenceOTU2663$$[u'k__Bacteria', u'p__Actinobacteria', u'c__MB-A2-108', u'o__0319-7L14', u'f__', u'g__', u's__']
607	New.ReferenceOTU185$$[u'k__Bacteria', u'p__Actinobacteria', u'c__Acidimicrobiia', u'o__Acidimicrobiales', u'f__', u'g__', u's__']
608	New.ReferenceOTU2052$$[u'k__Bacteria', u'p__Proteobacteria', u'c__Alphaproteobacteria', u'o__Rhodospirillales', u'f__Rhodospirillaceae', u'g__', u's__']
609	New.ReferenceOTU2123$$[u'k__Bacteria', u'p__Chloroflexi', u'c__C0119', u'o__', u'f__', u'g__', u's__']
610	New.ReferenceOTU171$$[u'k__Bacteria', u'p__Actinobacteria', u'c__Actinobacteria', u'o__Actinomycetales', u'f__Geodermatophilaceae', u'g__Geodermatophilus']
611	New.ReferenceOTU2460$$[u'k__Bacteria', u'p__Actinobacteria', u'c__Actinobacteria', u'o__Actinomycetales', u'f__Geodermatophilaceae']
612	New.ReferenceOTU2607$$[u'k__Bacteria', u'p__Acidobacteria', u'c__Acidobacteria-6', u'o__iii1-15', u'f__', u'g__', u's__']
613	New.ReferenceOTU2286$$[u'k__Bacteria', u'p__Actinobacteria', u'c__Thermoleophilia', u'o__Solirubrobacterales', u'f__Solirubrobacteraceae', u'g__', u's__']
614	New.ReferenceOTU2138$$[u'k__Bacteria', u'p__Actinobacteria', u'c__Actinobacteria', u'o__Micrococcales', u'f__', u'g__', u's__']
615	New.ReferenceOTU2133$$[u'k__Bacteria', u'p__Actinobacteria', u'c__Actinobacteria', u'o__Actinomycetales', u'f__Nocardioidaceae', u'g__Nocardioides', u's__']
616	New.ReferenceOTU1173$$[u'k__Bacteria', u'p__Actinobacteria', u'c__Actinobacteria', u'o__Actinomycetales', u'f__Nocardioidaceae', u'g__Kribbella', u's__']
617	New.ReferenceOTU2456$$[u'k__Bacteria', u'p__Actinobacteria', u'c__Thermoleophilia', u'o__Solirubrobacterales', u'f__Solirubrobacteraceae', u'g__', u's__']
618	New.ReferenceOTU1945$$[u'k__Bacteria', u'p__Actinobacteria', u'c__Thermoleophilia', u'o__Solirubrobacterales']
619	New.ReferenceOTU1948$$[u'k__Bacteria', u'p__Actinobacteria', u'c__Actinobacteria', u'o__Actinomycetales', u'f__Pseudonocardiaceae', u'g__Pseudonocardia', u's__']
620	New.ReferenceOTU1490$$[u'k__Bacteria', u'p__Acidobacteria', u'c__Acidobacteria-6', u'o__iii1-15', u'f__RB40', u'g__', u's__']
621	New.ReferenceOTU2629$$[u'k__Bacteria', u'p__Actinobacteria', u'c__Acidimicrobiia', u'o__Acidimicrobiales', u'f__EB1017', u'g__', u's__']
622	New.ReferenceOTU2651$$[u'k__Bacteria', u'p__Proteobacteria', u'c__Deltaproteobacteria', u'o__Myxococcales']
623	New.ReferenceOTU1156$$[u'k__Bacteria', u'p__Armatimonadetes', u'c__[Fimbriimonadia]', u'o__[Fimbriimonadales]', u'f__[Fimbriimonadaceae]', u'g__Fimbriimonas', u's__']
624	New.ReferenceOTU323$$[u'k__Bacteria', u'p__Actinobacteria', u'c__Thermoleophilia', u'o__Gaiellales', u'f__Gaiellaceae', u'g__', u's__']
625	New.ReferenceOTU2365$$[u'k__Bacteria', u'p__Proteobacteria', u'c__Betaproteobacteria', u'o__', u'f__', u'g__', u's__']
626	New.ReferenceOTU1636$$[u'k__Bacteria', u'p__Chloroflexi', u'c__Ellin6529', u'o__', u'f__', u'g__', u's__']
627	New.ReferenceOTU1708$$[u'k__Bacteria', u'p__Proteobacteria', u'c__Deltaproteobacteria', u'o__Myxococcales']
628	New.ReferenceOTU2086$$[u'k__Bacteria', u'p__Gemmatimonadetes', u'c__Gemmatimonadetes', u'o__Ellin5290', u'f__', u'g__', u's__']
629	New.ReferenceOTU1994$$[u'k__Bacteria', u'p__Acidobacteria', u'c__Acidobacteria-6', u'o__iii1-15', u'f__', u'g__', u's__']
630	New.ReferenceOTU654$$[u'k__Bacteria', u'p__Actinobacteria', u'c__Actinobacteria', u'o__Actinomycetales']
631	New.ReferenceOTU2410$$[u'k__Bacteria', u'p__Chloroflexi', u'c__Gitt-GS-136', u'o__', u'f__', u'g__', u's__']
632	New.ReferenceOTU1192$$[u'k__Bacteria', u'p__Actinobacteria', u'c__Actinobacteria', u'o__Actinomycetales', u'f__Geodermatophilaceae']
633	New.ReferenceOTU1474$$[u'k__Bacteria', u'p__Actinobacteria', u'c__Actinobacteria', u'o__Actinomycetales', u'f__Promicromonosporaceae']
634	New.ReferenceOTU1182$$[u'k__Bacteria', u'p__Proteobacteria', u'c__Gammaproteobacteria', u'o__Xanthomonadales', u'f__Xanthomonadaceae']
635	New.CleanUp.ReferenceOTU9891$$[u'k__Bacteria', u'p__Acidobacteria']
636	New.CleanUp.ReferenceOTU15610$$[u'k__Bacteria', u'p__Chloroflexi', u'c__Anaerolineae', u'o__H39', u'f__', u'g__', u's__']
637	New.CleanUp.ReferenceOTU17204$$[u'k__Bacteria', u'p__Firmicutes', u'c__Bacilli', u'o__Bacillales', u'f__Planococcaceae']
638	New.CleanUp.ReferenceOTU29021$$[u'k__Bacteria', u'p__Proteobacteria', u'c__Deltaproteobacteria', u'o__Myxococcales']
639	New.CleanUp.ReferenceOTU35649$$[u'k__Bacteria', u'p__Actinobacteria', u'c__Actinobacteria', u'o__Actinomycetales']
640	New.CleanUp.ReferenceOTU43101$$[u'k__Bacteria', u'p__Gemmatimonadetes', u'c__Gemm-3', u'o__', u'f__', u'g__', u's__']
641	New.CleanUp.ReferenceOTU44575$$[u'k__Bacteria', u'p__Proteobacteria', u'c__Deltaproteobacteria', u'o__Myxococcales']
642	New.CleanUp.ReferenceOTU45150$$[u'k__Bacteria', u'p__Actinobacteria', u'c__Actinobacteria', u'o__Actinomycetales', u'f__Streptomycetaceae', u'g__Streptomyces']
643	New.CleanUp.ReferenceOTU53864$$[u'k__Bacteria', u'p__Proteobacteria', u'c__Gammaproteobacteria', u'o__Xanthomonadales', u'f__Sinobacteraceae', u'g__', u's__']
644	New.CleanUp.ReferenceOTU64581$$[u'k__Bacteria', u'p__Proteobacteria', u'c__Betaproteobacteria', u'o__Burkholderiales', u'f__Comamonadaceae', u'g__Acidovorax']
645	New.CleanUp.ReferenceOTU81389$$[u'k__Bacteria', u'p__Chloroflexi', u'c__Ellin6529', u'o__', u'f__', u'g__', u's__']
646	New.CleanUp.ReferenceOTU118774$$[u'k__Bacteria', u'p__Chloroflexi', u'c__Anaerolineae', u'o__CFB-26', u'f__', u'g__', u's__']
647	New.CleanUp.ReferenceOTU142209$$[u'k__Bacteria', u'p__Actinobacteria', u'c__Actinobacteria', u'o__Actinomycetales']
648	New.CleanUp.ReferenceOTU162870$$[u'k__Bacteria', u'p__Proteobacteria', u'c__Deltaproteobacteria', u'o__Syntrophobacterales', u'f__Syntrophobacteraceae', u'g__', u's__']
649	New.CleanUp.ReferenceOTU167385$$[u'k__Bacteria', u'p__Actinobacteria', u'c__Actinobacteria', u'o__Actinomycetales']
650	New.CleanUp.ReferenceOTU222601$$[u'k__Bacteria', u'p__Actinobacteria', u'c__Actinobacteria', u'o__Actinomycetales', u'f__Mycobacteriaceae', u'g__Mycobacterium']
651	New.CleanUp.ReferenceOTU225053$$[u'k__Bacteria', u'p__Chloroflexi', u'c__S085', u'o__', u'f__', u'g__', u's__']
652	New.CleanUp.ReferenceOTU229892$$[u'k__Bacteria', u'p__Chloroflexi', u'c__TK17', u'o__', u'f__', u'g__', u's__']
653	New.CleanUp.ReferenceOTU241927$$[u'k__Bacteria', u'p__Acidobacteria', u'c__Acidobacteria-6']
654	New.CleanUp.ReferenceOTU243309$$[u'k__Bacteria', u'p__Acidobacteria', u'c__[Chloracidobacteria]', u'o__RB41', u'f__Ellin6075', u'g__', u's__']
655	New.CleanUp.ReferenceOTU244197$$[u'k__Bacteria', u'p__Actinobacteria', u'c__Actinobacteria', u'o__Actinomycetales']
656	New.CleanUp.ReferenceOTU253860$$[u'k__Bacteria', u'p__Actinobacteria', u'c__Thermoleophilia', u'o__Solirubrobacterales', u'f__Solirubrobacteraceae', u'g__', u's__']
657	New.CleanUp.ReferenceOTU267907$$[u'k__Bacteria', u'p__Planctomycetes', u'c__Planctomycetia', u'o__Pirellulales', u'f__Pirellulaceae', u'g__', u's__']
658	New.CleanUp.ReferenceOTU280734$$[u'k__Bacteria', u'p__Acidobacteria', u'c__Acidobacteria-6', u'o__iii1-15', u'f__', u'g__', u's__']
659	New.CleanUp.ReferenceOTU324128$$[u'k__Bacteria', u'p__Actinobacteria', u'c__Thermoleophilia', u'o__Gaiellales', u'f__Gaiellaceae', u'g__', u's__']
660	New.CleanUp.ReferenceOTU328165$$[u'k__Bacteria', u'p__Proteobacteria', u'c__Alphaproteobacteria', u'o__Rhizobiales']
661	New.CleanUp.ReferenceOTU328980$$[u'k__Bacteria', u'p__Acidobacteria', u'c__Acidobacteria-6', u'o__iii1-15', u'f__', u'g__', u's__']
662	New.CleanUp.ReferenceOTU333710$$[u'k__Bacteria', u'p__Proteobacteria', u'c__Betaproteobacteria', u'o__MND1', u'f__', u'g__', u's__']
663	New.CleanUp.ReferenceOTU365941$$[u'k__Bacteria', u'p__Actinobacteria', u'c__Actinobacteria']
664	New.CleanUp.ReferenceOTU371218$$[u'k__Bacteria', u'p__Acidobacteria', u'c__Acidobacteria-6', u'o__iii1-15', u'f__mb2424', u'g__', u's__']
665	New.CleanUp.ReferenceOTU432408$$[u'k__Bacteria', u'p__Acidobacteria', u'c__Acidobacteria-6', u'o__', u'f__', u'g__', u's__']
666	New.CleanUp.ReferenceOTU459106$$[u'k__Bacteria', u'p__Proteobacteria', u'c__Gammaproteobacteria', u'o__Xanthomonadales', u'f__Xanthomonadaceae']
667	New.CleanUp.ReferenceOTU485539$$[u'k__Bacteria', u'p__Proteobacteria', u'c__Gammaproteobacteria', u'o__Xanthomonadales', u'f__Xanthomonadaceae']
668	New.CleanUp.ReferenceOTU504407$$[u'k__Bacteria', u'p__Proteobacteria', u'c__Deltaproteobacteria', u'o__Syntrophobacterales', u'f__Syntrophobacteraceae', u'g__', u's__']
669	New.CleanUp.ReferenceOTU505255$$[u'k__Bacteria', u'p__Planctomycetes', u'c__Pla4', u'o__', u'f__', u'g__', u's__']
670	New.CleanUp.ReferenceOTU526889$$[u'k__Bacteria', u'p__Actinobacteria', u'c__Actinobacteria', u'o__Actinomycetales']
671	New.CleanUp.ReferenceOTU546568$$[u'k__Bacteria', u'p__Actinobacteria', u'c__Thermoleophilia', u'o__Gaiellales', u'f__Gaiellaceae', u'g__', u's__']
672	New.CleanUp.ReferenceOTU548746$$[u'k__Bacteria', u'p__Proteobacteria', u'c__Deltaproteobacteria', u'o__Myxococcales', u'f__Haliangiaceae', u'g__', u's__']
673	New.CleanUp.ReferenceOTU568422$$[u'k__Bacteria', u'p__Acidobacteria', u'c__Acidobacteria-6', u'o__iii1-15', u'f__', u'g__', u's__']
674	New.CleanUp.ReferenceOTU583138$$[u'k__Bacteria', u'p__Acidobacteria', u'c__Acidobacteria-6', u'o__iii1-15', u'f__mb2424', u'g__', u's__']
675	New.CleanUp.ReferenceOTU601897$$[u'k__Bacteria', u'p__Actinobacteria', u'c__Actinobacteria', u'o__Actinomycetales', u'f__Sporichthyaceae', u'g__', u's__']
676	New.CleanUp.ReferenceOTU602892$$[u'k__Bacteria', u'p__Actinobacteria']
677	New.CleanUp.ReferenceOTU657213$$[u'k__Bacteria', u'p__Verrucomicrobia', u'c__[Pedosphaerae]', u'o__[Pedosphaerales]', u'f__', u'g__', u's__']
678	New.CleanUp.ReferenceOTU678795$$[u'k__Bacteria', u'p__Verrucomicrobia', u'c__[Spartobacteria]', u'o__[Chthoniobacterales]', u'f__[Chthoniobacteraceae]', u'g__DA101', u's__']
679	New.CleanUp.ReferenceOTU700300$$[u'k__Bacteria', u'p__Proteobacteria', u'c__Alphaproteobacteria', u'o__Rhizobiales', u'f__Hyphomicrobiaceae']
680	New.CleanUp.ReferenceOTU752229$$[u'k__Bacteria', u'p__Proteobacteria', u'c__Betaproteobacteria', u'o__Burkholderiales', u'f__Comamonadaceae', u'g__Variovorax', u's__paradoxus']
681	113577$$[u'k__Bacteria', u'p__Proteobacteria', u'c__Betaproteobacteria', u'o__Ellin6067', u'f__', u'g__', u's__']
682	2689396$$[u'k__Bacteria', u'p__Proteobacteria', u'c__Gammaproteobacteria', u'o__Enterobacteriales', u'f__Enterobacteriaceae', u'g__Escherichia', u's__coli']
683	810371$$[u'k__Bacteria', u'p__Planctomycetes', u'c__Phycisphaerae', u'o__WD2101', u'f__', u'g__', u's__']
684	334113$$[u'k__Bacteria', u'p__Acidobacteria', u'c__Acidobacteria-6', u'o__iii1-15', u'f__', u'g__', u's__']
685	4364411$$[u'k__Bacteria', u'p__Proteobacteria', u'c__Alphaproteobacteria', u'o__Sphingomonadales', u'f__Sphingomonadaceae']
686	1009254$$[u'k__Bacteria', u'p__Actinobacteria', u'c__Actinobacteria', u'o__Actinomycetales', u'f__Streptosporangiaceae', u'g__Sphaerisporangium', u's__']
687	4473685$$[u'k__Bacteria', u'p__Tenericutes', u'c__Mollicutes', u'o__Anaeroplasmatales', u'f__Anaeroplasmataceae', u'g__Asteroleplasma', u's__']
688	509629$$[u'k__Bacteria', u'p__Verrucomicrobia', u'c__[Pedosphaerae]', u'o__[Pedosphaerales]', u'f__', u'g__', u's__']
689	612951$$[u'k__Bacteria', u'p__Acidobacteria', u'c__Acidobacteria-6', u'o__iii1-15', u'f__mb2424', u'g__', u's__']
690	727008$$[u'k__Bacteria', u'p__Actinobacteria', u'c__Acidimicrobiia', u'o__Acidimicrobiales', u'f__', u'g__', u's__']
691	4365306$$[u'k__Bacteria', u'p__Proteobacteria', u'c__Alphaproteobacteria', u'o__Rhizobiales', u'f__Bradyrhizobiaceae', u'g__Balneimonas', u's__']
692	822381$$[u'k__Bacteria', u'p__Actinobacteria', u'c__Actinobacteria', u'o__Actinomycetales', u'f__Nocardioidaceae', u'g__Aeromicrobium', u's__']
693	219818$$[u'k__Bacteria', u'p__Actinobacteria', u'c__Thermoleophilia', u'o__Gaiellales', u'f__Gaiellaceae', u'g__', u's__']
694	4370738$$[u'k__Bacteria', u'p__Proteobacteria', u'c__Deltaproteobacteria', u'o__Myxococcales', u'f__', u'g__', u's__']
695	761601$$[u'k__Bacteria', u'p__Proteobacteria', u'c__Gammaproteobacteria', u'o__Xanthomonadales', u'f__Sinobacteraceae', u'g__', u's__']
696	869850$$[u'k__Bacteria', u'p__Verrucomicrobia', u'c__Verrucomicrobiae', u'o__Verrucomicrobiales', u'f__Verrucomicrobiaceae', u'g__Luteolibacter', u's__']
697	4350694$$[u'k__Bacteria', u'p__Verrucomicrobia', u'c__[Spartobacteria]', u'o__[Chthoniobacterales]', u'f__[Chthoniobacteraceae]', u'g__Candidatus Xiphinematobacter', u's__']
698	2296710$$[u'k__Bacteria', u'p__Proteobacteria', u'c__Alphaproteobacteria', u'o__Rhizobiales', u'f__Hyphomicrobiaceae', u'g__Hyphomicrobium']
699	361233$$[u'k__Bacteria', u'p__Proteobacteria', u'c__Gammaproteobacteria', u'o__Xanthomonadales', u'f__Xanthomonadaceae', u'g__Lysobacter', u's__']
700	348270$$[u'k__Bacteria', u'p__Acidobacteria', u'c__Acidobacteria-6', u'o__iii1-15', u'f__', u'g__', u's__']
701	13115$$[u'k__Bacteria', u'p__Actinobacteria', u'c__Actinobacteria', u'o__Actinomycetales', u'f__Mycobacteriaceae', u'g__Mycobacterium', u's__']
702	977026$$[u'k__Bacteria', u'p__Actinobacteria', u'c__Actinobacteria', u'o__Actinomycetales', u'f__Micromonosporaceae', u'g__Catellatospora', u's__']
703	4483077$$[u'k__Bacteria', u'p__Proteobacteria', u'c__Alphaproteobacteria', u'o__Sphingomonadales', u'f__Sphingomonadaceae', u'g__Kaistobacter', u's__']
704	354765$$[u'k__Bacteria', u'p__Actinobacteria', u'c__Actinobacteria', u'o__Actinomycetales', u'f__Micromonosporaceae']
705	113935$$[u'k__Bacteria', u'p__Actinobacteria', u'c__Actinobacteria', u'o__Actinomycetales', u'f__Micromonosporaceae', u'g__Pilimelia', u's__']
706	113939$$[u'k__Bacteria', u'p__Bacteroidetes', u'c__[Saprospirae]', u'o__[Saprospirales]', u'f__Chitinophagaceae', u'g__', u's__']
707	711663$$[u'k__Bacteria', u'p__Proteobacteria', u'c__Alphaproteobacteria', u'o__Rhodospirillales', u'f__Acetobacteraceae', u'g__', u's__']
708	4302936$$[u'k__Bacteria', u'p__Gemmatimonadetes', u'c__Gemm-1', u'o__', u'f__', u'g__', u's__']
709	805487$$[u'k__Bacteria', u'p__Actinobacteria', u'c__Actinobacteria', u'o__Actinomycetales', u'f__Streptomycetaceae', u'g__Streptomyces']
710	242534$$[u'k__Bacteria', u'p__Acidobacteria', u'c__Solibacteres', u'o__Solibacterales', u'f__', u'g__', u's__']
711	224042$$[u'k__Bacteria', u'p__Proteobacteria', u'c__Betaproteobacteria', u'o__Burkholderiales', u'f__Comamonadaceae']
712	642447$$[u'k__Bacteria', u'p__Acidobacteria', u'c__Solibacteres', u'o__Solibacterales', u'f__Solibacteraceae', u'g__Candidatus Solibacter', u's__']
713	331282$$[u'k__Bacteria', u'p__Proteobacteria', u'c__Alphaproteobacteria', u'o__Sphingomonadales', u'f__Sphingomonadaceae', u'g__Sphingomonas', u's__wittichii']
714	955577$$[u'k__Bacteria', u'p__Actinobacteria', u'c__Acidimicrobiia', u'o__Acidimicrobiales', u'f__', u'g__', u's__']
715	553058$$[u'k__Bacteria', u'p__Verrucomicrobia', u'c__[Spartobacteria]', u'o__[Chthoniobacterales]', u'f__[Chthoniobacteraceae]', u'g__', u's__']
716	105699$$[u'k__Bacteria', u'p__Proteobacteria', u'c__Gammaproteobacteria', u'o__Xanthomonadales', u'f__Xanthomonadaceae', u'g__', u's__']
717	4024061$$[u'k__Bacteria', u'p__Acidobacteria', u'c__Acidobacteria-6', u'o__iii1-15', u'f__', u'g__', u's__']
718	928766$$[u'k__Bacteria', u'p__Bacteroidetes', u'c__[Saprospirae]', u'o__[Saprospirales]', u'f__Chitinophagaceae', u'g__', u's__']
719	184325$$[u'k__Bacteria', u'p__Proteobacteria', u'c__Gammaproteobacteria', u'o__Xanthomonadales', u'f__Xanthomonadaceae', u'g__Rhodanobacter', u's__']
720	4438361$$[u'k__Bacteria', u'p__Acidobacteria', u'c__Solibacteres', u'o__Solibacterales', u'f__', u'g__', u's__']
721	769696$$[u'k__Bacteria', u'p__Chloroflexi', u'c__Ellin6529', u'o__', u'f__', u'g__', u's__']
722	242184$$[u'k__Bacteria', u'p__Proteobacteria', u'c__Alphaproteobacteria', u'o__Rhodospirillales', u'f__Rhodospirillaceae', u'g__', u's__']
723	554420$$[u'k__Bacteria', u'p__Actinobacteria', u'c__Actinobacteria', u'o__Actinomycetales', u'f__Micromonosporaceae', u'g__', u's__']
724	2629538$$[u'k__Bacteria', u'p__Chloroflexi', u'c__TK10', u'o__', u'f__', u'g__', u's__']
725	318609$$[u'k__Bacteria', u'p__Proteobacteria', u'c__Alphaproteobacteria', u'o__Rhizobiales', u'f__Bradyrhizobiaceae']
726	137881$$[u'k__Bacteria', u'p__Proteobacteria', u'c__Alphaproteobacteria', u'o__Sphingomonadales', u'f__Sphingomonadaceae', u'g__Kaistobacter', u's__']
727	225279$$[u'k__Bacteria', u'p__Proteobacteria', u'c__Alphaproteobacteria', u'o__Rhizobiales', u'f__Rhizobiaceae', u'g__', u's__']
728	4024062$$[u'k__Bacteria', u'p__Acidobacteria', u'c__Acidobacteria-6', u'o__iii1-15', u'f__', u'g__', u's__']
729	655531$$[u'k__Bacteria', u'p__Firmicutes', u'c__Bacilli', u'o__Bacillales', u'f__Planococcaceae', u'g__Sporosarcina', u's__']
730	3902438$$[u'k__Bacteria', u'p__Actinobacteria', u'c__Actinobacteria', u'o__Actinomycetales', u'f__Microbacteriaceae']
731	142009$$[u'k__Bacteria', u'p__Proteobacteria', u'c__Betaproteobacteria', u'o__SC-I-84', u'f__', u'g__', u's__']
732	827612$$[u'k__Bacteria', u'p__Proteobacteria', u'c__Betaproteobacteria', u'o__Burkholderiales', u'f__Comamonadaceae']
733	776252$$[u'k__Bacteria', u'p__Gemmatimonadetes', u'c__Gemmatimonadetes', u'o__Ellin5290', u'f__', u'g__', u's__']
734	568461$$[u'k__Bacteria', u'p__Actinobacteria', u'c__Thermoleophilia', u'o__Gaiellales', u'f__Gaiellaceae', u'g__', u's__']
735	206609$$[u'k__Bacteria', u'p__Proteobacteria', u'c__Betaproteobacteria', u'o__Ellin6067', u'f__', u'g__', u's__']
736	154482$$[u'k__Bacteria', u'p__Firmicutes', u'c__Bacilli', u'o__Bacillales', u'f__Bacillaceae', u'g__Bacillus']
737	937434$$[u'k__Bacteria', u'p__Proteobacteria', u'c__Deltaproteobacteria', u'o__Myxococcales', u'f__OM27', u'g__', u's__']
738	791957$$[u'k__Bacteria', u'p__Verrucomicrobia', u'c__Verrucomicrobiae', u'o__Verrucomicrobiales', u'f__Verrucomicrobiaceae', u'g__', u's__']
739	4349122$$[u'k__Bacteria', u'p__Planctomycetes', u'c__Planctomycetia', u'o__Pirellulales', u'f__Pirellulaceae', u'g__', u's__']
740	4021888$$[u'k__Bacteria', u'p__Proteobacteria', u'c__Alphaproteobacteria', u'o__Ellin329', u'f__', u'g__', u's__']
741	778795$$[u'k__Bacteria', u'p__Gemmatimonadetes', u'c__Gemmatimonadetes', u'o__', u'f__', u'g__', u's__']
742	253026$$[u'k__Bacteria', u'p__Proteobacteria', u'c__Deltaproteobacteria', u'o__Myxococcales', u'f__OM27', u'g__', u's__']
743	4388003$$[u'k__Bacteria', u'p__Verrucomicrobia', u'c__[Pedosphaerae]', u'o__[Pedosphaerales]']
744	210865$$[u'k__Bacteria', u'p__Proteobacteria', u'c__Alphaproteobacteria', u'o__Rhodospirillales', u'f__Rhodospirillaceae', u'g__', u's__']
745	237257$$[u'k__Bacteria', u'p__Chloroflexi', u'c__Anaerolineae', u'o__envOPS12', u'f__', u'g__', u's__']
746	4358809$$[u'k__Bacteria', u'p__Bacteroidetes', u'c__[Saprospirae]', u'o__[Saprospirales]', u'f__Chitinophagaceae', u'g__', u's__']
747	203689$$[u'k__Bacteria', u'p__Proteobacteria', u'c__Deltaproteobacteria', u'o__Myxococcales']
748	211818$$[u'k__Bacteria', u'p__Chloroflexi', u'c__S085', u'o__', u'f__', u'g__', u's__']
749	1136589$$[u'k__Bacteria', u'p__Proteobacteria', u'c__Alphaproteobacteria', u'o__Rhodospirillales', u'f__Rhodospirillaceae']
750	1125248$$[u'k__Bacteria', u'p__Proteobacteria', u'c__Gammaproteobacteria', u'o__Xanthomonadales', u'f__Xanthomonadaceae', u'g__Dokdonella', u's__']
751	723142$$[u'k__Bacteria', u'p__Proteobacteria', u'c__Betaproteobacteria', u'o__MND1', u'f__', u'g__', u's__']
752	2565174$$[u'k__Bacteria', u'p__Planctomycetes', u'c__Planctomycetia', u'o__Gemmatales', u'f__Gemmataceae', u'g__Gemmata', u's__']
753	4309098$$[u'k__Bacteria', u'p__Actinobacteria', u'c__Acidimicrobiia', u'o__Acidimicrobiales', u'f__', u'g__', u's__']
754	257008$$[u'k__Bacteria', u'p__Bacteroidetes', u'c__[Saprospirae]', u'o__[Saprospirales]', u'f__Chitinophagaceae']
755	1070143$$[u'k__Bacteria', u'p__Proteobacteria', u'c__Deltaproteobacteria', u'o__Myxococcales', u'f__', u'g__', u's__']
756	693348$$[u'k__Bacteria', u'p__Bacteroidetes', u'c__[Saprospirae]', u'o__[Saprospirales]', u'f__Chitinophagaceae', u'g__', u's__']
757	74352$$[u'k__Bacteria', u'p__Actinobacteria', u'c__Actinobacteria', u'o__Actinomycetales', u'f__Micromonosporaceae']
758	105210$$[u'k__Bacteria', u'p__Actinobacteria', u'c__Actinobacteria', u'o__Actinomycetales', u'f__Microbacteriaceae', u'g__Agromyces']
759	1120118$$[u'k__Bacteria', u'p__Proteobacteria', u'c__Gammaproteobacteria', u'o__Xanthomonadales', u'f__Xanthomonadaceae']
760	1012112$$[u'k__Bacteria', u'p__Actinobacteria', u'c__Thermoleophilia', u'o__Solirubrobacterales', u'f__Solirubrobacteraceae', u'g__', u's__']
761	4465158$$[u'k__Bacteria', u'p__Proteobacteria', u'c__Alphaproteobacteria', u'o__Sphingomonadales', u'f__Sphingomonadaceae', u'g__Kaistobacter', u's__']
762	4364514$$[u'k__Bacteria', u'p__Actinobacteria', u'c__Acidimicrobiia', u'o__Acidimicrobiales', u'f__', u'g__', u's__']
763	6602$$[u'k__Bacteria', u'p__Proteobacteria', u'c__Betaproteobacteria', u'o__Nitrosomonadales', u'f__Nitrosomonadaceae', u'g__Nitrosovibrio', u's__tenuis']
764	569749$$[u'k__Bacteria', u'p__Chloroflexi', u'c__S085', u'o__', u'f__', u'g__', u's__']
765	142330$$[u'k__Bacteria', u'p__Bacteroidetes', u'c__[Saprospirae]', u'o__[Saprospirales]', u'f__Chitinophagaceae', u'g__', u's__']
766	133961$$[u'k__Bacteria', u'p__Proteobacteria', u'c__Gammaproteobacteria', u'o__Pseudomonadales', u'f__Pseudomonadaceae']
767	99326$$[u'k__Bacteria', u'p__Proteobacteria', u'c__Alphaproteobacteria', u'o__Sphingomonadales', u'f__Sphingomonadaceae']
768	4477117$$[u'k__Bacteria', u'p__Planctomycetes', u'c__Planctomycetia', u'o__B97', u'f__', u'g__', u's__']
769	4353898$$[u'k__Bacteria', u'p__Actinobacteria', u'c__Acidimicrobiia', u'o__Acidimicrobiales', u'f__', u'g__', u's__']
770	222581$$[u'k__Bacteria', u'p__Actinobacteria', u'c__Actinobacteria', u'o__Actinomycetales', u'f__Micromonosporaceae', u'g__', u's__']
771	678420$$[u'k__Bacteria', u'p__Proteobacteria', u'c__Alphaproteobacteria', u'o__', u'f__', u'g__', u's__']
772	4334725$$[u'k__Bacteria', u'p__Acidobacteria', u'c__Acidobacteria-6', u'o__iii1-15', u'f__', u'g__', u's__']
773	1024572$$[u'k__Bacteria', u'p__Actinobacteria']
774	235541$$[u'k__Bacteria', u'p__Verrucomicrobia', u'c__[Pedosphaerae]', u'o__[Pedosphaerales]']
775	242612$$[u'k__Bacteria', u'p__Proteobacteria', u'c__Betaproteobacteria', u'o__MND1', u'f__', u'g__', u's__']
776	250987$$[u'k__Bacteria', u'p__Actinobacteria', u'c__Acidimicrobiia', u'o__Acidimicrobiales', u'f__', u'g__', u's__']
777	4463767$$[u'k__Bacteria', u'p__Actinobacteria', u'c__Actinobacteria', u'o__Actinomycetales', u'f__Nocardioidaceae', u'g__', u's__']
778	1044938$$[u'k__Bacteria', u'p__Gemmatimonadetes', u'c__Gemmatimonadetes', u'o__Gemmatimonadales', u'f__Gemmatimonadaceae', u'g__Gemmatimonas', u's__']
779	4318277$$[u'k__Bacteria', u'p__Proteobacteria', u'c__Betaproteobacteria', u'o__Burkholderiales', u'f__Comamonadaceae', u'g__Acidovorax', u's__']
780	575993$$[u'k__Bacteria', u'p__Proteobacteria', u'c__Deltaproteobacteria', u'o__Spirobacillales', u'f__', u'g__', u's__']
781	1022861$$[u'k__Bacteria', u'p__Actinobacteria', u'c__Thermoleophilia', u'o__Gaiellales', u'f__Gaiellaceae', u'g__', u's__']
782	278697$$[u'k__Bacteria', u'p__Proteobacteria', u'c__Deltaproteobacteria', u'o__Myxococcales']
783	202381$$[u'k__Bacteria', u'p__Actinobacteria', u'c__Actinobacteria', u'o__Actinomycetales']
784	547806$$[u'k__Bacteria', u'p__Actinobacteria', u'c__Actinobacteria', u'o__Actinomycetales', u'f__Actinosynnemataceae']
785	4449185$$[u'k__Bacteria', u'p__Proteobacteria', u'c__Alphaproteobacteria', u'o__Rhizobiales', u'f__Phyllobacteriaceae']
786	2946783$$[u'k__Bacteria', u'p__Proteobacteria', u'c__Alphaproteobacteria', u'o__Sphingomonadales', u'f__Erythrobacteraceae', u'g__', u's__']
787	225633$$[u'k__Bacteria', u'p__Verrucomicrobia', u'c__[Spartobacteria]', u'o__[Chthoniobacterales]', u'f__[Chthoniobacteraceae]', u'g__DA101', u's__']
788	254392$$[u'k__Bacteria', u'p__Proteobacteria', u'c__Betaproteobacteria', u'o__Ellin6067', u'f__', u'g__', u's__']
789	651779$$[u'k__Bacteria', u'p__Acidobacteria', u'c__Acidobacteria-6', u'o__iii1-15', u'f__mb2424', u'g__', u's__']
790	226530$$[u'k__Bacteria', u'p__Acidobacteria', u'c__iii1-8', u'o__DS-18', u'f__', u'g__', u's__']
791	579954$$[u'k__Bacteria', u'p__Verrucomicrobia', u'c__[Spartobacteria]', u'o__[Chthoniobacterales]', u'f__[Chthoniobacteraceae]', u'g__Chthoniobacter', u's__']
792	7229$$[u'k__Bacteria', u'p__Proteobacteria', u'c__Betaproteobacteria', u'o__Burkholderiales', u'f__Burkholderiaceae', u'g__Burkholderia', u's__']
793	1129787$$[u'k__Bacteria', u'p__Planctomycetes', u'c__Phycisphaerae', u'o__WD2101', u'f__', u'g__', u's__']
794	1135458$$[u'k__Bacteria', u'p__Proteobacteria', u'c__Alphaproteobacteria', u'o__Sphingomonadales', u'f__Sphingomonadaceae', u'g__Sphingobium', u's__']
795	4456633$$[u'k__Bacteria', u'p__Acidobacteria', u'c__[Chloracidobacteria]', u'o__RB41', u'f__Ellin6075', u'g__', u's__']
796	862901$$[u'k__Bacteria', u'p__Acidobacteria', u'c__Solibacteres', u'o__Solibacterales', u'f__', u'g__', u's__']
797	864304$$[u'k__Bacteria', u'p__Actinobacteria', u'c__Thermoleophilia', u'o__Solirubrobacterales', u'f__', u'g__', u's__']
798	1098922$$[u'k__Bacteria', u'p__Proteobacteria', u'c__Alphaproteobacteria', u'o__Rhizobiales', u'f__Hyphomicrobiaceae', u'g__Hyphomicrobium', u's__']
799	4463100$$[u'k__Bacteria', u'p__Bacteroidetes', u'c__[Saprospirae]', u'o__[Saprospirales]', u'f__Saprospiraceae', u'g__', u's__']
800	2788507$$[u'k__Bacteria', u'p__Planctomycetes', u'c__Planctomycetia', u'o__Planctomycetales', u'f__Planctomycetaceae', u'g__Planctomyces', u's__']
801	2199910$$[u'k__Bacteria', u'p__Actinobacteria', u'c__Actinobacteria', u'o__Actinomycetales', u'f__Intrasporangiaceae']
802	358332$$[u'k__Bacteria', u'p__Chloroflexi', u'c__S085', u'o__', u'f__', u'g__', u's__']
803	1021984$$[u'k__Bacteria', u'p__Proteobacteria', u'c__Deltaproteobacteria', u'o__Myxococcales']
804	4476892$$[u'k__Bacteria', u'p__Proteobacteria', u'c__Alphaproteobacteria', u'o__Sphingomonadales', u'f__Sphingomonadaceae', u'g__Kaistobacter', u's__']
805	275105$$[u'k__Bacteria', u'p__Acidobacteria', u'c__[Chloracidobacteria]', u'o__RB41', u'f__', u'g__', u's__']
806	823116$$[u'k__Bacteria', u'p__Proteobacteria', u'c__Alphaproteobacteria', u'o__Rhizobiales']
807	100260$$[u'k__Bacteria', u'p__Actinobacteria', u'c__Actinobacteria', u'o__Actinomycetales', u'f__Intrasporangiaceae']
808	4325081$$[u'k__Bacteria', u'p__Actinobacteria', u'c__Actinobacteria', u'o__Actinomycetales', u'f__Kineosporiaceae', u'g__', u's__']
809	1140357$$[u'k__Bacteria', u'p__Actinobacteria', u'c__Acidimicrobiia', u'o__Acidimicrobiales', u'f__', u'g__', u's__']
810	4310044$$[u'k__Bacteria', u'p__Chloroflexi', u'c__Chloroflexi', u'o__[Roseiflexales]', u'f__[Kouleothrixaceae]', u'g__', u's__']
811	1140359$$[u'k__Bacteria', u'p__Actinobacteria', u'c__Acidimicrobiia', u'o__Acidimicrobiales', u'f__', u'g__', u's__']
812	4301105$$[u'k__Bacteria', u'p__Actinobacteria', u'c__Actinobacteria', u'o__Actinomycetales', u'f__Mycobacteriaceae', u'g__Mycobacterium']
813	172128$$[u'k__Bacteria', u'p__Proteobacteria', u'c__Alphaproteobacteria', u'o__Rhizobiales', u'f__Hyphomicrobiaceae', u'g__Hyphomicrobium', u's__']
814	3043332$$[u'k__Bacteria', u'p__Actinobacteria', u'c__Actinobacteria', u'o__Actinomycetales', u'f__Pseudonocardiaceae', u'g__Amycolatopsis', u's__']
815	113209$$[u'k__Bacteria', u'p__Acidobacteria', u'c__Acidobacteria-6']
816	576693$$[u'k__Bacteria', u'p__Proteobacteria', u'c__Alphaproteobacteria', u'o__Rhodospirillales', u'f__Rhodospirillaceae']
817	4364838$$[u'k__Bacteria', u'p__Proteobacteria', u'c__Alphaproteobacteria', u'o__Rhodospirillales', u'f__Rhodospirillaceae', u'g__Skermanella', u's__']
818	4385103$$[u'k__Bacteria', u'p__Acidobacteria', u'c__iii1-8', u'o__SJA-36', u'f__', u'g__', u's__']
819	1107128$$[u'k__Bacteria', u'p__Verrucomicrobia', u'c__[Spartobacteria]', u'o__[Chthoniobacterales]', u'f__[Chthoniobacteraceae]', u'g__DA101', u's__']
820	813632$$[u'k__Bacteria', u'p__Proteobacteria', u'c__Deltaproteobacteria', u'o__Myxococcales', u'f__OM27', u'g__', u's__']
821	222792$$[u'k__Bacteria', u'p__Proteobacteria', u'c__Alphaproteobacteria', u'o__Rhizobiales', u'f__Hyphomicrobiaceae', u'g__Rhodoplanes', u's__']
822	3984866$$[u'k__Bacteria', u'p__Proteobacteria', u'c__Alphaproteobacteria', u'o__Rhizobiales']
823	810416$$[u'k__Bacteria', u'p__Proteobacteria', u'c__Alphaproteobacteria', u'o__Rhodospirillales', u'f__Rhodospirillaceae', u'g__', u's__']
824	936318$$[u'k__Bacteria', u'p__Actinobacteria', u'c__Thermoleophilia', u'o__Gaiellales', u'f__Gaiellaceae', u'g__', u's__']
825	4445604$$[u'k__Bacteria', u'p__Proteobacteria', u'c__Betaproteobacteria', u'o__Burkholderiales', u'f__Oxalobacteraceae']
826	215591$$[u'k__Bacteria', u'p__Planctomycetes', u'c__Phycisphaerae', u'o__WD2101', u'f__', u'g__', u's__']
827	4437581$$[u'k__Bacteria', u'p__Proteobacteria', u'c__Alphaproteobacteria', u'o__Sphingomonadales', u'f__Sphingomonadaceae', u'g__Kaistobacter', u's__']
828	101868$$[u'k__Bacteria', u'p__Verrucomicrobia', u'c__[Spartobacteria]', u'o__[Chthoniobacterales]', u'f__[Chthoniobacteraceae]', u'g__DA101', u's__']
829	330035$$[u'k__Bacteria', u'p__Firmicutes', u'c__Bacilli', u'o__Bacillales', u'f__Planococcaceae', u'g__Sporosarcina', u's__']
830	712016$$[u'k__Bacteria', u'p__WS3', u'c__PRR-12', u'o__Sediment-1', u'f__', u'g__', u's__']
831	2815106$$[u'k__Bacteria', u'p__Acidobacteria', u'c__Acidobacteria-6', u'o__iii1-15', u'f__', u'g__', u's__']
832	539907$$[u'k__Bacteria', u'p__Proteobacteria', u'c__Deltaproteobacteria', u'o__Syntrophobacterales', u'f__Syntrophobacteraceae', u'g__', u's__']
833	773026$$[u'k__Bacteria', u'p__Verrucomicrobia', u'c__[Pedosphaerae]', u'o__[Pedosphaerales]']
834	158804$$[u'k__Bacteria', u'p__Actinobacteria', u'c__Actinobacteria', u'o__Actinomycetales', u'f__Nocardioidaceae', u'g__', u's__']
835	815546$$[u'k__Bacteria', u'p__Acidobacteria', u'c__DA052', u'o__Ellin6513', u'f__', u'g__', u's__']
836	1011958$$[u'k__Bacteria', u'p__Verrucomicrobia', u'c__[Spartobacteria]', u'o__[Chthoniobacterales]', u'f__[Chthoniobacteraceae]', u'g__', u's__']
837	823019$$[u'k__Bacteria', u'p__Planctomycetes', u'c__Phycisphaerae', u'o__Phycisphaerales', u'f__', u'g__', u's__']
838	136560$$[u'k__Bacteria', u'p__Actinobacteria', u'c__Actinobacteria', u'o__Actinomycetales', u'f__Micrococcaceae', u'g__Arthrobacter']
839	246243$$[u'k__Bacteria', u'p__Bacteroidetes', u'c__[Saprospirae]', u'o__[Saprospirales]', u'f__Chitinophagaceae', u'g__', u's__']
840	912714$$[u'k__Bacteria', u'p__Planctomycetes', u'c__Phycisphaerae', u'o__WD2101', u'f__', u'g__', u's__']
841	1108876$$[u'k__Bacteria', u'p__Actinobacteria', u'c__Actinobacteria', u'o__Actinomycetales', u'f__Nocardioidaceae', u'g__Nocardioides', u's__']
842	208929$$[u'k__Bacteria', u'p__Proteobacteria', u'c__Betaproteobacteria', u'o__Burkholderiales', u'f__Oxalobacteraceae', u'g__Janthinobacterium', u's__']
843	214977$$[u'k__Bacteria', u'p__Proteobacteria', u'c__Betaproteobacteria', u'o__SC-I-84', u'f__', u'g__', u's__']
844	519104$$[u'k__Bacteria', u'p__Proteobacteria', u'c__Alphaproteobacteria', u'o__Rhodospirillales']
845	113674$$[u'k__Bacteria', u'p__Bacteroidetes', u'c__Sphingobacteriia', u'o__Sphingobacteriales', u'f__', u'g__', u's__']
846	1925452$$[u'k__Bacteria', u'p__Acidobacteria', u'c__[Chloracidobacteria]', u'o__RB41', u'f__Ellin6075', u'g__', u's__']
847	2307130$$[u'k__Bacteria', u'p__Proteobacteria', u'c__Betaproteobacteria', u'o__Burkholderiales', u'f__Oxalobacteraceae']
848	208779$$[u'k__Bacteria', u'p__Proteobacteria', u'c__Alphaproteobacteria', u'o__Rhizobiales']
849	207947$$[u'k__Bacteria', u'p__Actinobacteria', u'c__Actinobacteria', u'o__Actinomycetales', u'f__Intrasporangiaceae']
850	4337890$$[u'k__Bacteria', u'p__Proteobacteria', u'c__Gammaproteobacteria', u'o__Xanthomonadales', u'f__Xanthomonadaceae', u'g__Lysobacter', u's__']
851	211287$$[u'k__Bacteria', u'p__Chloroflexi', u'c__S085', u'o__', u'f__', u'g__', u's__']
852	255448$$[u'k__Bacteria', u'p__Bacteroidetes', u'c__[Saprospirae]', u'o__[Saprospirales]', u'f__Chitinophagaceae', u'g__', u's__']
853	4301050$$[u'k__Bacteria', u'p__Proteobacteria', u'c__Alphaproteobacteria', u'o__Sphingomonadales', u'f__Sphingomonadaceae', u'g__Sphingomonas', u's__']
854	132602$$[u'k__Bacteria', u'p__Actinobacteria', u'c__Actinobacteria', u'o__Actinomycetales', u'f__Streptomycetaceae']
855	154189$$[u'k__Bacteria', u'p__Proteobacteria', u'c__Alphaproteobacteria', u'o__Sphingomonadales']
856	972343$$[u'k__Bacteria', u'p__Actinobacteria', u'c__Actinobacteria', u'o__Actinomycetales', u'f__Nakamurellaceae', u'g__', u's__']
857	12364$$[u'k__Bacteria', u'p__Actinobacteria', u'c__Actinobacteria', u'o__Actinomycetales', u'f__Intrasporangiaceae', u'g__Terracoccus', u's__']
858	4334695$$[u'k__Bacteria', u'p__Proteobacteria', u'c__Gammaproteobacteria', u'o__Xanthomonadales', u'f__Xanthomonadaceae', u'g__', u's__']
859	555876$$[u'k__Bacteria', u'p__Bacteroidetes', u'c__[Saprospirae]', u'o__[Saprospirales]', u'f__Chitinophagaceae', u'g__', u's__']
860	240715$$[u'k__Bacteria', u'p__Actinobacteria', u'c__Thermoleophilia', u'o__Solirubrobacterales', u'f__', u'g__', u's__']
861	818286$$[u'k__Bacteria', u'p__Acidobacteria', u'c__Acidobacteria-6', u'o__iii1-15', u'f__', u'g__', u's__']
862	254401$$[u'k__Bacteria', u'p__Proteobacteria', u'c__Alphaproteobacteria', u'o__Caulobacterales', u'f__Caulobacteraceae', u'g__Phenylobacterium', u's__']
863	40511$$[u'k__Bacteria', u'p__Proteobacteria', u'c__Alphaproteobacteria', u'o__Rhizobiales', u'f__', u'g__', u's__']
864	249068$$[u'k__Bacteria', u'p__Actinobacteria', u'c__Actinobacteria', u'o__Actinomycetales', u'f__Micromonosporaceae', u'g__Pilimelia', u's__']
865	550231$$[u'k__Bacteria', u'p__Planctomycetes', u'c__Phycisphaerae', u'o__WD2101', u'f__', u'g__', u's__']
866	4339540$$[u'k__Bacteria', u'p__Acidobacteria', u'c__[Chloracidobacteria]', u'o__RB41', u'f__Ellin6075', u'g__', u's__']
867	221903$$[u'k__Bacteria', u'p__Proteobacteria', u'c__Betaproteobacteria', u'o__A21b', u'f__UD5', u'g__', u's__']
868	4401816$$[u'k__Bacteria', u'p__Actinobacteria', u'c__Actinobacteria', u'o__Actinomycetales', u'f__Micrococcaceae']
869	567776$$[u'k__Bacteria', u'p__Proteobacteria', u'c__Alphaproteobacteria', u'o__Rhizobiales', u'f__Bradyrhizobiaceae']
870	929699$$[u'k__Bacteria', u'p__Verrucomicrobia', u'c__[Spartobacteria]', u'o__[Chthoniobacterales]', u'f__[Chthoniobacteraceae]', u'g__DA101', u's__']
871	170339$$[u'k__Bacteria', u'p__Proteobacteria', u'c__Betaproteobacteria', u'o__Burkholderiales', u'f__Comamonadaceae', u'g__Ramlibacter', u's__']
872	New.ReferenceOTU2193$$[u'k__Bacteria', u'p__Acidobacteria', u'c__Sva0725', u'o__Sva0725', u'f__', u'g__', u's__']
873	New.ReferenceOTU1885$$[u'k__Bacteria', u'p__Verrucomicrobia', u'c__[Pedosphaerae]', u'o__[Pedosphaerales]', u'f__Ellin515', u'g__', u's__']
874	New.ReferenceOTU1268$$[u'k__Bacteria', u'p__Planctomycetes', u'c__Phycisphaerae', u'o__WD2101', u'f__', u'g__', u's__']
875	New.ReferenceOTU1264$$[u'k__Bacteria', u'p__Acidobacteria', u'c__[Chloracidobacteria]', u'o__RB41', u'f__', u'g__', u's__']
876	New.ReferenceOTU1668$$[u'k__Bacteria', u'p__Gemmatimonadetes', u'c__Gemmatimonadetes', u'o__N1423WL', u'f__', u'g__', u's__']
877	New.ReferenceOTU586$$[u'k__Bacteria', u'p__Acidobacteria', u'c__Acidobacteria-6']
878	New.ReferenceOTU2211$$[u'k__Bacteria', u'p__Proteobacteria', u'c__Alphaproteobacteria', u'o__Rhizobiales', u'f__Bradyrhizobiaceae', u'g__Balneimonas', u's__']
879	New.ReferenceOTU2328$$[u'k__Bacteria', u'p__Proteobacteria', u'c__Alphaproteobacteria', u'o__Rhizobiales']
880	New.ReferenceOTU2325$$[u'k__Bacteria', u'p__Planctomycetes', u'c__Planctomycetia', u'o__Gemmatales', u'f__Gemmataceae', u'g__Gemmata', u's__']
881	New.ReferenceOTU1896$$[u'k__Bacteria', u'p__Proteobacteria', u'c__Betaproteobacteria', u'o__Ellin6067', u'f__', u'g__', u's__']
882	New.ReferenceOTU962$$[u'k__Bacteria', u'p__Chloroflexi', u'c__Chloroflexi', u'o__[Roseiflexales]', u'f__[Kouleothrixaceae]', u'g__', u's__']
883	New.ReferenceOTU1303$$[u'k__Bacteria', u'p__Proteobacteria', u'c__Alphaproteobacteria', u'o__Rhizobiales', u'f__Hyphomicrobiaceae', u'g__Pedomicrobium', u's__']
884	New.ReferenceOTU119$$[u'k__Bacteria', u'p__Planctomycetes', u'c__C6', u'o__d113', u'f__', u'g__', u's__']
885	New.ReferenceOTU443$$[u'k__Bacteria', u'p__Proteobacteria', u'c__Deltaproteobacteria', u'o__[Entotheonellales]', u'f__[Entotheonellaceae]', u'g__', u's__']
886	New.ReferenceOTU445$$[u'k__Bacteria', u'p__Proteobacteria', u'c__Gammaproteobacteria', u'o__Xanthomonadales', u'f__Xanthomonadaceae', u'g__Rhodanobacter', u's__']
887	New.ReferenceOTU1096$$[u'k__Bacteria', u'p__Proteobacteria', u'c__Deltaproteobacteria', u'o__Myxococcales', u'f__', u'g__', u's__']
888	New.ReferenceOTU1095$$[u'k__Bacteria', u'p__Bacteroidetes', u'c__Sphingobacteriia', u'o__Sphingobacteriales', u'f__', u'g__', u's__']
889	New.ReferenceOTU1090$$[u'k__Bacteria', u'p__Chloroflexi', u'c__Anaerolineae', u'o__SBR1031', u'f__A4b', u'g__', u's__']
890	New.ReferenceOTU2687$$[u'k__Bacteria', u'p__Firmicutes', u'c__Bacilli', u'o__Bacillales', u'f__Planococcaceae', u'g__Sporosarcina', u's__']
891	New.ReferenceOTU1249$$[u'k__Bacteria', u'p__Proteobacteria', u'c__Deltaproteobacteria', u'o__Myxococcales', u'f__Haliangiaceae', u'g__', u's__']
892	New.ReferenceOTU610$$[u'k__Bacteria', u'p__Fibrobacteres', u'c__Fibrobacteria', u'o__258ds10', u'f__', u'g__', u's__']
893	New.ReferenceOTU1647$$[u'k__Bacteria', u'p__WS3', u'c__PRR-12', u'o__Sediment-1', u'f__PRR-10', u'g__', u's__']
894	New.ReferenceOTU120$$[u'k__Bacteria', u'p__Actinobacteria', u'c__Acidimicrobiia', u'o__Acidimicrobiales', u'f__C111', u'g__', u's__']
895	New.ReferenceOTU1922$$[u'k__Bacteria', u'p__Verrucomicrobia', u'c__Verrucomicrobiae', u'o__Verrucomicrobiales', u'f__Verrucomicrobiaceae', u'g__Luteolibacter', u's__']
896	New.ReferenceOTU1787$$[u'k__Bacteria', u'p__Proteobacteria', u'c__Alphaproteobacteria', u'o__Rhizobiales', u'f__Methylobacteriaceae']
897	New.ReferenceOTU1785$$[u'k__Bacteria', u'p__Proteobacteria', u'c__Betaproteobacteria', u'o__Ellin6067', u'f__', u'g__', u's__']
898	New.ReferenceOTU736$$[u'k__Bacteria', u'p__Proteobacteria', u'c__Betaproteobacteria', u'o__MND1', u'f__', u'g__', u's__']
899	New.ReferenceOTU2647$$[u'k__Bacteria', u'p__Acidobacteria', u'c__Acidobacteria-6', u'o__iii1-15', u'f__', u'g__', u's__']
900	New.ReferenceOTU1682$$[u'k__Bacteria', u'p__Chlorobi', u'c__', u'o__', u'f__', u'g__', u's__']
901	New.ReferenceOTU1680$$[u'k__Bacteria', u'p__Acidobacteria', u'c__Acidobacteria-6', u'o__iii1-15', u'f__', u'g__', u's__']
902	New.ReferenceOTU1130$$[u'k__Bacteria', u'p__Chloroflexi', u'c__Ellin6529', u'o__', u'f__', u'g__', u's__']
903	New.ReferenceOTU386$$[u'k__Bacteria', u'p__Proteobacteria', u'c__Deltaproteobacteria', u'o__Syntrophobacterales', u'f__Syntrophobacteraceae', u'g__', u's__']
904	New.ReferenceOTU2491$$[u'k__Bacteria', u'p__Proteobacteria', u'c__Alphaproteobacteria', u'o__Rhizobiales', u'f__Hyphomicrobiaceae']
905	New.ReferenceOTU2252$$[u'k__Bacteria', u'p__Proteobacteria', u'c__Alphaproteobacteria', u'o__Rhizobiales']
906	New.ReferenceOTU2071$$[u'k__Bacteria', u'p__Acidobacteria', u'c__Acidobacteria-6', u'o__iii1-15', u'f__', u'g__', u's__']
907	New.ReferenceOTU2101$$[u'k__Bacteria', u'p__Actinobacteria', u'c__Acidimicrobiia', u'o__Acidimicrobiales', u'f__', u'g__', u's__']
908	New.ReferenceOTU2109$$[u'k__Bacteria', u'p__Chloroflexi', u'c__Chloroflexi', u'o__[Roseiflexales]', u'f__[Kouleothrixaceae]', u'g__', u's__']
909	New.ReferenceOTU620$$[u'k__Bacteria', u'p__OD1', u'c__', u'o__', u'f__', u'g__', u's__']
910	New.ReferenceOTU1120$$[u'k__Bacteria', u'p__Actinobacteria', u'c__Thermoleophilia', u'o__Gaiellales', u'f__Gaiellaceae', u'g__', u's__']
911	New.ReferenceOTU2249$$[u'k__Bacteria', u'p__Verrucomicrobia', u'c__[Spartobacteria]', u'o__[Chthoniobacterales]', u'f__[Chthoniobacteraceae]', u'g__DA101', u's__']
912	New.ReferenceOTU971$$[u'k__Bacteria', u'p__Gemmatimonadetes', u'c__', u'o__', u'f__', u'g__', u's__']
913	New.ReferenceOTU883$$[u'k__Bacteria', u'p__Bacteroidetes', u'c__[Saprospirae]', u'o__[Saprospirales]', u'f__Chitinophagaceae', u'g__Flavisolibacter', u's__']
914	New.ReferenceOTU2066$$[u'k__Bacteria', u'p__Actinobacteria', u'c__Thermoleophilia', u'o__Solirubrobacterales', u'f__Solirubrobacteraceae', u'g__', u's__']
915	New.ReferenceOTU1975$$[u'k__Bacteria', u'p__Chloroflexi', u'c__Gitt-GS-136', u'o__', u'f__', u'g__', u's__']
916	New.ReferenceOTU12$$[u'k__Bacteria', u'p__Proteobacteria', u'c__Betaproteobacteria', u'o__Burkholderiales']
917	New.ReferenceOTU1809$$[u'k__Bacteria', u'p__Gemmatimonadetes', u'c__Gemm-2', u'o__', u'f__', u'g__', u's__']
918	New.ReferenceOTU1750$$[u'k__Bacteria', u'p__Firmicutes', u'c__Bacilli', u'o__Bacillales', u'f__Bacillaceae', u'g__Bacillus']
919	New.ReferenceOTU1570$$[u'k__Bacteria', u'p__Bacteroidetes', u'c__Sphingobacteriia', u'o__Sphingobacteriales', u'f__', u'g__', u's__']
920	New.ReferenceOTU1375$$[u'k__Bacteria', u'p__Acidobacteria', u'c__Solibacteres', u'o__Solibacterales', u'f__Solibacteraceae', u'g__Candidatus Solibacter', u's__']
921	New.ReferenceOTU368$$[u'k__Bacteria', u'p__Proteobacteria', u'c__Betaproteobacteria', u'o__Ellin6067', u'f__', u'g__', u's__']
922	New.ReferenceOTU2586$$[u'k__Bacteria', u'p__Proteobacteria', u'c__Deltaproteobacteria', u'o__Syntrophobacterales', u'f__Syntrophobacteraceae', u'g__', u's__']
923	New.ReferenceOTU2722$$[u'k__Bacteria', u'p__Actinobacteria', u'c__Actinobacteria', u'o__Actinomycetales', u'f__Nocardioidaceae']
924	New.ReferenceOTU5$$[u'k__Bacteria', u'p__Chloroflexi', u'c__Ellin6529', u'o__', u'f__', u'g__', u's__']
925	New.ReferenceOTU6$$[u'k__Bacteria', u'p__Acidobacteria', u'c__RB25', u'o__', u'f__', u'g__', u's__']
926	New.ReferenceOTU1961$$[u'k__Bacteria', u'p__Bacteroidetes', u'c__Cytophagia', u'o__Cytophagales', u'f__Cytophagaceae', u'g__Adhaeribacter', u's__']
927	New.ReferenceOTU1741$$[u'k__Bacteria', u'p__Proteobacteria', u'c__Deltaproteobacteria', u'o__Myxococcales', u'f__', u'g__', u's__']
928	New.ReferenceOTU775$$[u'k__Bacteria', u'p__Chloroflexi', u'c__Chloroflexi', u'o__[Roseiflexales]', u'f__', u'g__', u's__']
929	New.ReferenceOTU174$$[u'k__Bacteria', u'p__Proteobacteria', u'c__Betaproteobacteria', u'o__Burkholderiales', u'f__Comamonadaceae', u'g__Variovorax', u's__paradoxus']
930	New.ReferenceOTU2608$$[u'k__Bacteria', u'p__Planctomycetes', u'c__Planctomycetia', u'o__Gemmatales', u'f__Gemmataceae', u'g__', u's__']
931	New.ReferenceOTU995$$[u'k__Bacteria', u'p__Planctomycetes', u'c__Planctomycetia', u'o__Pirellulales', u'f__Pirellulaceae', u'g__Pirellula', u's__']
932	New.ReferenceOTU2281$$[u'k__Bacteria', u'p__Firmicutes', u'c__Bacilli', u'o__Bacillales', u'f__Planococcaceae', u'g__Sporosarcina', u's__']
933	New.ReferenceOTU741$$[u'k__Bacteria', u'p__Proteobacteria', u'c__Deltaproteobacteria', u'o__Myxococcales', u'f__Haliangiaceae', u'g__', u's__']
934	New.ReferenceOTU1175$$[u'k__Bacteria', u'p__OD1', u'c__ZB2', u'o__', u'f__', u'g__', u's__']
935	New.ReferenceOTU1550$$[u'k__Bacteria', u'p__Planctomycetes', u'c__Phycisphaerae', u'o__WD2101', u'f__', u'g__', u's__']
936	New.ReferenceOTU340$$[u'k__Bacteria', u'p__Acidobacteria', u'c__Acidobacteria-6', u'o__iii1-15', u'f__', u'g__', u's__']
937	New.ReferenceOTU343$$[u'k__Bacteria', u'p__Proteobacteria', u'c__Deltaproteobacteria', u'o__NB1-j', u'f__', u'g__', u's__']
938	New.ReferenceOTU2146$$[u'k__Bacteria', u'p__Verrucomicrobia', u'c__[Pedosphaerae]', u'o__[Pedosphaerales]']
939	New.ReferenceOTU755$$[u'k__Bacteria', u'p__Acidobacteria', u'c__Sva0725', u'o__Sva0725', u'f__', u'g__', u's__']
940	New.ReferenceOTU1161$$[u'k__Bacteria', u'p__WS3', u'c__PRR-12', u'o__Sediment-1', u'f__PRR-10', u'g__', u's__']
941	New.ReferenceOTU1168$$[u'k__Bacteria', u'p__Actinobacteria', u'c__Actinobacteria', u'o__Actinomycetales']
942	New.ReferenceOTU1019$$[u'k__Bacteria', u'p__Planctomycetes', u'c__Planctomycetia', u'o__Gemmatales', u'f__Gemmataceae', u'g__Gemmata', u's__']
943	New.ReferenceOTU532$$[u'k__Bacteria', u'p__Chloroflexi', u'c__Chloroflexi', u'o__[Roseiflexales]', u'f__[Kouleothrixaceae]', u'g__', u's__']
944	New.ReferenceOTU2717$$[u'k__Bacteria', u'p__Acidobacteria', u'c__Solibacteres', u'o__Solibacterales', u'f__Solibacteraceae', u'g__Candidatus Solibacter', u's__']
945	New.ReferenceOTU1849$$[u'k__Bacteria', u'p__Actinobacteria', u'c__Thermoleophilia', u'o__Solirubrobacterales', u'f__', u'g__', u's__']
946	New.ReferenceOTU1621$$[u'k__Bacteria', u'p__Proteobacteria', u'c__Betaproteobacteria', u'o__Burkholderiales', u'f__Comamonadaceae', u'g__Methylibium', u's__']
947	New.ReferenceOTU1711$$[u'k__Bacteria', u'p__Gemmatimonadetes', u'c__Gemmatimonadetes', u'o__Gemmatimonadales', u'f__Ellin5301', u'g__', u's__']
948	New.ReferenceOTU328$$[u'k__Bacteria', u'p__Planctomycetes', u'c__Phycisphaerae', u'o__WD2101', u'f__', u'g__', u's__']
949	New.ReferenceOTU1449$$[u'k__Bacteria', u'p__Verrucomicrobia', u'c__[Pedosphaerae]', u'o__[Pedosphaerales]']
950	New.ReferenceOTU789$$[u'k__Bacteria', u'p__Planctomycetes', u'c__Phycisphaerae', u'o__WD2101', u'f__', u'g__', u's__']
951	New.ReferenceOTU2544$$[u'k__Bacteria', u'p__Actinobacteria', u'c__Actinobacteria', u'o__Actinomycetales', u'f__Micromonosporaceae']
952	New.ReferenceOTU256$$[u'k__Bacteria', u'p__Proteobacteria', u'c__Deltaproteobacteria', u'o__Myxococcales', u'f__OM27', u'g__', u's__']
953	New.ReferenceOTU2761$$[u'k__Bacteria', u'p__Acidobacteria', u'c__Acidobacteria-6', u'o__iii1-15', u'f__', u'g__', u's__']
954	New.ReferenceOTU43$$[u'k__Bacteria', u'p__Proteobacteria', u'c__Alphaproteobacteria', u'o__Rhizobiales', u'f__Hyphomicrobiaceae', u'g__Rhodoplanes']
955	New.ReferenceOTU1505$$[u'k__Bacteria', u'p__Actinobacteria', u'c__Acidimicrobiia', u'o__Acidimicrobiales', u'f__C111', u'g__', u's__']
956	New.ReferenceOTU335$$[u'k__Bacteria', u'p__Proteobacteria', u'c__Gammaproteobacteria', u'o__Xanthomonadales', u'f__Sinobacteraceae', u'g__', u's__']
957	New.ReferenceOTU332$$[u'k__Bacteria', u'p__Proteobacteria', u'c__Deltaproteobacteria', u'o__Myxococcales', u'f__Haliangiaceae', u'g__', u's__']
958	New.ReferenceOTU1737$$[u'k__Bacteria', u'p__Chloroflexi', u'c__TK17', u'o__mle1-48', u'f__', u'g__', u's__']
959	New.ReferenceOTU658$$[u'k__Bacteria', u'p__Actinobacteria', u'c__Actinobacteria', u'o__Actinomycetales', u'f__Nocardioidaceae']
960	New.ReferenceOTU1027$$[u'k__Bacteria', u'p__Nitrospirae', u'c__Nitrospira', u'o__Nitrospirales', u'f__Nitrospiraceae', u'g__Nitrospira']
961	New.ReferenceOTU2566$$[u'k__Bacteria', u'p__Actinobacteria', u'c__Thermoleophilia', u'o__Gaiellales', u'f__Gaiellaceae', u'g__', u's__']
962	New.ReferenceOTU2186$$[u'k__Bacteria', u'p__Proteobacteria', u'c__Deltaproteobacteria', u'o__Syntrophobacterales', u'f__Syntrophobacteraceae', u'g__', u's__']
963	New.ReferenceOTU69$$[u'k__Bacteria', u'p__Planctomycetes', u'c__Phycisphaerae', u'o__Phycisphaerales', u'f__', u'g__', u's__']
964	New.ReferenceOTU62$$[u'k__Bacteria', u'p__Nitrospirae', u'c__Nitrospira', u'o__Nitrospirales', u'f__0319-6A21', u'g__', u's__']
965	New.ReferenceOTU1721$$[u'k__Bacteria', u'p__Acidobacteria', u'c__RB25', u'o__', u'f__', u'g__', u's__']
966	New.ReferenceOTU1054$$[u'k__Bacteria', u'p__TM7', u'c__', u'o__', u'f__', u'g__', u's__']
967	New.ReferenceOTU1509$$[u'k__Bacteria', u'p__Proteobacteria', u'c__Betaproteobacteria', u'o__MND1', u'f__', u'g__', u's__']
968	New.ReferenceOTU2404$$[u'k__Bacteria', u'p__Acidobacteria', u'c__[Chloracidobacteria]', u'o__RB41', u'f__', u'g__', u's__']
969	New.ReferenceOTU2407$$[u'k__Bacteria', u'p__Actinobacteria', u'c__Actinobacteria', u'o__Actinomycetales', u'f__Nocardiaceae', u'g__Rhodococcus']
970	New.ReferenceOTU2406$$[u'k__Bacteria', u'p__Bacteroidetes', u'c__Cytophagia', u'o__Cytophagales', u'f__Cytophagaceae', u'g__', u's__']
971	New.ReferenceOTU468$$[u'k__Bacteria', u'p__Chloroflexi', u'c__Ktedonobacteria', u'o__Thermogemmatisporales', u'f__Thermogemmatisporaceae', u'g__', u's__']
972	New.ReferenceOTU2751$$[u'k__Bacteria', u'p__Proteobacteria', u'c__Gammaproteobacteria', u'o__Legionellales']
973	New.CleanUp.ReferenceOTU12$$[u'k__Bacteria', u'p__Proteobacteria', u'c__Gammaproteobacteria', u'o__Xanthomonadales', u'f__Sinobacteraceae', u'g__Steroidobacter', u's__']
974	New.CleanUp.ReferenceOTU1153$$[u'k__Bacteria', u'p__Proteobacteria', u'c__Deltaproteobacteria', u'o__Myxococcales', u'f__Haliangiaceae', u'g__', u's__']
975	New.CleanUp.ReferenceOTU3856$$[u'k__Bacteria', u'p__Planctomycetes', u'c__Planctomycetia', u'o__Pirellulales', u'f__Pirellulaceae', u'g__', u's__']
976	New.CleanUp.ReferenceOTU5944$$[u'k__Bacteria', u'p__Planctomycetes', u'c__Phycisphaerae', u'o__WD2101', u'f__', u'g__', u's__']
977	New.CleanUp.ReferenceOTU18370$$[u'k__Bacteria', u'p__Proteobacteria', u'c__Betaproteobacteria', u'o__Burkholderiales', u'f__Oxalobacteraceae']
978	New.CleanUp.ReferenceOTU23056$$[u'k__Bacteria', u'p__Acidobacteria', u'c__[Chloracidobacteria]', u'o__RB41', u'f__Ellin6075', u'g__', u's__']
979	New.CleanUp.ReferenceOTU23540$$[u'k__Bacteria', u'p__Proteobacteria', u'c__Betaproteobacteria', u'o__SC-I-84', u'f__', u'g__', u's__']
980	New.CleanUp.ReferenceOTU35761$$[u'k__Bacteria', u'p__Bacteroidetes', u'c__Cytophagia', u'o__Cytophagales', u'f__Cytophagaceae', u'g__', u's__']
981	New.CleanUp.ReferenceOTU36117$$[u'k__Bacteria', u'p__Chloroflexi', u'c__Chloroflexi', u'o__[Roseiflexales]', u'f__', u'g__', u's__']
982	New.CleanUp.ReferenceOTU37766$$[u'k__Bacteria', u'p__Planctomycetes', u'c__OM190', u'o__agg27', u'f__', u'g__', u's__']
983	New.CleanUp.ReferenceOTU38842$$[u'k__Bacteria', u'p__Chloroflexi', u'c__Ktedonobacteria', u'o__Ktedonobacterales', u'f__Ktedonobacteraceae', u'g__', u's__']
984	New.CleanUp.ReferenceOTU43891$$[u'k__Bacteria', u'p__Gemmatimonadetes', u'c__Gemmatimonadetes', u'o__N1423WL', u'f__', u'g__', u's__']
985	New.CleanUp.ReferenceOTU45389$$[u'k__Bacteria', u'p__Bacteroidetes', u'c__[Saprospirae]', u'o__[Saprospirales]', u'f__Chitinophagaceae', u'g__', u's__']
986	New.CleanUp.ReferenceOTU45621$$[u'k__Bacteria', u'p__Chloroflexi', u'c__Anaerolineae', u'o__SBR1031', u'f__A4b', u'g__', u's__']
987	New.CleanUp.ReferenceOTU48881$$[u'k__Bacteria', u'p__Bacteroidetes', u'c__[Saprospirae]', u'o__[Saprospirales]', u'f__', u'g__', u's__']
988	New.CleanUp.ReferenceOTU50197$$[u'k__Bacteria', u'p__Gemmatimonadetes', u'c__Gemm-5', u'o__', u'f__', u'g__', u's__']
989	New.CleanUp.ReferenceOTU52955$$[u'k__Bacteria', u'p__Proteobacteria', u'c__Alphaproteobacteria', u'o__Rhizobiales', u'f__Bradyrhizobiaceae']
990	New.CleanUp.ReferenceOTU55356$$[u'k__Bacteria', u'p__Verrucomicrobia', u'c__[Pedosphaerae]', u'o__[Pedosphaerales]', u'f__', u'g__', u's__']
991	New.CleanUp.ReferenceOTU56849$$[u'k__Bacteria', u'p__Acidobacteria', u'c__[Chloracidobacteria]', u'o__DS-100', u'f__', u'g__', u's__']
992	New.CleanUp.ReferenceOTU59239$$[u'k__Bacteria', u'p__Proteobacteria', u'c__Alphaproteobacteria', u'o__Rhizobiales', u'f__Bradyrhizobiaceae']
993	New.CleanUp.ReferenceOTU71052$$[u'k__Bacteria', u'p__Actinobacteria', u'c__Actinobacteria', u'o__Actinomycetales', u'f__Nocardioidaceae']
994	New.CleanUp.ReferenceOTU75105$$[u'k__Bacteria', u'p__Proteobacteria', u'c__Betaproteobacteria', u'o__MND1', u'f__', u'g__', u's__']
995	New.CleanUp.ReferenceOTU75378$$[u'k__Bacteria', u'p__Acidobacteria', u'c__Acidobacteria-6', u'o__iii1-15', u'f__', u'g__', u's__']
996	New.CleanUp.ReferenceOTU75946$$[u'k__Bacteria', u'p__Proteobacteria', u'c__Alphaproteobacteria', u'o__Rhodospirillales', u'f__Rhodospirillaceae', u'g__', u's__']
997	New.CleanUp.ReferenceOTU80527$$[u'k__Bacteria', u'p__Acidobacteria', u'c__Acidobacteria-6', u'o__CCU21', u'f__', u'g__', u's__']
998	New.CleanUp.ReferenceOTU86474$$[u'k__Bacteria', u'p__Bacteroidetes', u'c__[Saprospirae]', u'o__[Saprospirales]', u'f__Chitinophagaceae', u'g__', u's__']
999	New.CleanUp.ReferenceOTU88818$$[u'k__Bacteria', u'p__Verrucomicrobia', u'c__[Pedosphaerae]', u'o__[Pedosphaerales]']
1000	New.CleanUp.ReferenceOTU93382$$[u'k__Bacteria', u'p__Planctomycetes', u'c__Planctomycetia', u'o__Pirellulales', u'f__Pirellulaceae', u'g__Pirellula', u's__']
1001	New.CleanUp.ReferenceOTU94977$$[u'k__Bacteria', u'p__Acidobacteria', u'c__Acidobacteriia', u'o__Acidobacteriales', u'f__Koribacteraceae', u'g__', u's__']
1002	New.CleanUp.ReferenceOTU97269$$[u'k__Bacteria', u'p__Chloroflexi', u'c__C0119', u'o__', u'f__', u'g__', u's__']
1003	New.CleanUp.ReferenceOTU108450$$[u'k__Bacteria', u'p__Proteobacteria', u'c__Betaproteobacteria', u'o__Ellin6067', u'f__', u'g__', u's__']
1004	New.CleanUp.ReferenceOTU110766$$[u'k__Bacteria', u'p__Acidobacteria', u'c__Sva0725', u'o__Sva0725', u'f__', u'g__', u's__']
1005	New.CleanUp.ReferenceOTU111160$$[u'k__Bacteria', u'p__Bacteroidetes', u'c__[Saprospirae]', u'o__[Saprospirales]', u'f__Chitinophagaceae', u'g__', u's__']
1006	New.CleanUp.ReferenceOTU114408$$[u'k__Bacteria', u'p__Acidobacteria', u'c__[Chloracidobacteria]', u'o__RB41', u'f__Ellin6075', u'g__', u's__']
1007	New.CleanUp.ReferenceOTU118339$$[u'k__Bacteria', u'p__Proteobacteria', u'c__Alphaproteobacteria', u'o__Rhizobiales', u'f__Beijerinckiaceae']
1008	New.CleanUp.ReferenceOTU121162$$[u'k__Bacteria', u'p__Proteobacteria', u'c__Betaproteobacteria', u'o__SC-I-84', u'f__', u'g__', u's__']
1009	New.CleanUp.ReferenceOTU121524$$[u'k__Bacteria', u'p__Proteobacteria', u'c__Alphaproteobacteria', u'o__Sphingomonadales', u'f__Sphingomonadaceae', u'g__Kaistobacter', u's__']
1010	New.CleanUp.ReferenceOTU123224$$[u'k__Bacteria', u'p__Actinobacteria', u'c__Actinobacteria', u'o__Actinomycetales', u'f__Nocardioidaceae', u'g__', u's__']
1011	New.CleanUp.ReferenceOTU126134$$[u'k__Bacteria', u'p__Actinobacteria', u'c__Acidimicrobiia', u'o__Acidimicrobiales', u'f__EB1017', u'g__', u's__']
1012	New.CleanUp.ReferenceOTU136743$$[u'k__Bacteria', u'p__Actinobacteria', u'c__Acidimicrobiia', u'o__Acidimicrobiales', u'f__', u'g__', u's__']
1013	New.CleanUp.ReferenceOTU140345$$[u'k__Bacteria', u'p__Verrucomicrobia', u'c__Verrucomicrobiae', u'o__Verrucomicrobiales', u'f__Verrucomicrobiaceae', u'g__', u's__']
1014	New.CleanUp.ReferenceOTU149869$$[u'k__Bacteria', u'p__Acidobacteria', u'c__Acidobacteria-6', u'o__iii1-15', u'f__', u'g__', u's__']
1015	New.CleanUp.ReferenceOTU157063$$[u'k__Bacteria', u'p__Bacteroidetes', u'c__[Saprospirae]', u'o__[Saprospirales]', u'f__Chitinophagaceae', u'g__Niastella', u's__']
1016	New.CleanUp.ReferenceOTU157457$$[u'k__Bacteria', u'p__TM7', u'c__TM7-1', u'o__', u'f__', u'g__', u's__']
1017	New.CleanUp.ReferenceOTU162418$$[u'k__Bacteria', u'p__Acidobacteria', u'c__iii1-8', u'o__DS-18', u'f__', u'g__', u's__']
1018	New.CleanUp.ReferenceOTU163825$$[u'k__Bacteria', u'p__Planctomycetes', u'c__Planctomycetia', u'o__Gemmatales', u'f__Gemmataceae', u'g__Gemmata', u's__']
1019	New.CleanUp.ReferenceOTU179130$$[u'k__Bacteria', u'p__Chloroflexi', u'c__Gitt-GS-136', u'o__', u'f__', u'g__', u's__']
1020	New.CleanUp.ReferenceOTU180781$$[u'k__Bacteria', u'p__Planctomycetes', u'c__Planctomycetia', u'o__Planctomycetales', u'f__Planctomycetaceae', u'g__Planctomyces', u's__']
1021	New.CleanUp.ReferenceOTU193630$$[u'k__Bacteria', u'p__Acidobacteria', u'c__[Chloracidobacteria]', u'o__PK29', u'f__', u'g__', u's__']
1022	New.CleanUp.ReferenceOTU194611$$[u'k__Bacteria', u'p__Planctomycetes', u'c__OM190', u'o__CL500-15', u'f__', u'g__', u's__']
1023	New.CleanUp.ReferenceOTU197921$$[u'k__Bacteria', u'p__Planctomycetes', u'c__Planctomycetia', u'o__Gemmatales', u'f__Gemmataceae', u'g__', u's__']
1024	New.CleanUp.ReferenceOTU198361$$[u'k__Bacteria', u'p__Planctomycetes', u'c__Planctomycetia', u'o__Pirellulales', u'f__Pirellulaceae', u'g__', u's__']
1025	New.CleanUp.ReferenceOTU210214$$[u'k__Bacteria', u'p__Acidobacteria', u'c__Acidobacteria-5', u'o__', u'f__', u'g__', u's__']
1026	New.CleanUp.ReferenceOTU213976$$[u'k__Bacteria', u'p__Actinobacteria', u'c__Acidimicrobiia', u'o__Acidimicrobiales', u'f__', u'g__', u's__']
1027	New.CleanUp.ReferenceOTU215940$$[u'k__Bacteria', u'p__Proteobacteria', u'c__Gammaproteobacteria', u'o__Xanthomonadales', u'f__Xanthomonadaceae']
1028	New.CleanUp.ReferenceOTU216757$$[u'k__Bacteria', u'p__Proteobacteria', u'c__Gammaproteobacteria', u'o__Xanthomonadales', u'f__Xanthomonadaceae', u'g__Lysobacter']
1029	New.CleanUp.ReferenceOTU232981$$[u'k__Bacteria', u'p__Acidobacteria', u'c__Acidobacteria-6', u'o__iii1-15', u'f__RB40', u'g__', u's__']
1030	New.CleanUp.ReferenceOTU243843$$[u'k__Bacteria', u'p__Bacteroidetes', u'c__Cytophagia', u'o__Cytophagales', u'f__Cytophagaceae', u'g__', u's__']
1031	New.CleanUp.ReferenceOTU247014$$[u'k__Bacteria', u'p__Acidobacteria', u'c__Sva0725', u'o__Sva0725', u'f__', u'g__', u's__']
1032	New.CleanUp.ReferenceOTU250013$$[u'k__Bacteria', u'p__NKB19', u'c__', u'o__', u'f__', u'g__', u's__']
1033	New.CleanUp.ReferenceOTU250197$$[u'k__Bacteria', u'p__Acidobacteria', u'c__Acidobacteria-6', u'o__iii1-15', u'f__', u'g__', u's__']
1034	New.CleanUp.ReferenceOTU250644$$[u'k__Bacteria', u'p__Bacteroidetes', u'c__[Saprospirae]', u'o__[Saprospirales]', u'f__Chitinophagaceae', u'g__Flavisolibacter', u's__']
1035	New.CleanUp.ReferenceOTU255052$$[u'k__Bacteria', u'p__Acidobacteria', u'c__Acidobacteria-6', u'o__iii1-15', u'f__RB40', u'g__', u's__']
1036	New.CleanUp.ReferenceOTU264161$$[u'k__Bacteria', u'p__Chloroflexi', u'c__Chloroflexi', u'o__Chloroflexales']
1037	New.CleanUp.ReferenceOTU266516$$[u'k__Bacteria', u'p__Firmicutes', u'c__Bacilli', u'o__Bacillales', u'f__Bacillaceae', u'g__Bacillus', u's__flexus']
1038	New.CleanUp.ReferenceOTU270748$$[u'k__Bacteria', u'p__Acidobacteria', u'c__Acidobacteria-5', u'o__', u'f__', u'g__', u's__']
1039	New.CleanUp.ReferenceOTU270790$$[u'k__Bacteria', u'p__Acidobacteria', u'c__Acidobacteria-6', u'o__CCU21', u'f__', u'g__', u's__']
1040	New.CleanUp.ReferenceOTU271275$$[u'k__Bacteria', u'p__Proteobacteria', u'c__Deltaproteobacteria', u'o__Myxococcales', u'f__', u'g__', u's__']
1041	New.CleanUp.ReferenceOTU275499$$[u'k__Bacteria', u'p__Planctomycetes', u'c__Planctomycetia', u'o__Pirellulales', u'f__Pirellulaceae', u'g__', u's__']
1042	New.CleanUp.ReferenceOTU275530$$[u'k__Bacteria', u'p__Gemmatimonadetes', u'c__Gemmatimonadetes', u'o__C114', u'f__', u'g__', u's__']
1043	New.CleanUp.ReferenceOTU277522$$[u'k__Bacteria', u'p__Planctomycetes', u'c__Phycisphaerae', u'o__WD2101', u'f__', u'g__', u's__']
1044	New.CleanUp.ReferenceOTU278606$$[u'k__Bacteria', u'p__Gemmatimonadetes', u'c__Gemmatimonadetes', u'o__KD8-87', u'f__', u'g__', u's__']
1045	New.CleanUp.ReferenceOTU278649$$[u'k__Bacteria', u'p__Armatimonadetes', u'c__[Fimbriimonadia]', u'o__[Fimbriimonadales]', u'f__', u'g__', u's__']
1046	New.CleanUp.ReferenceOTU281141$$[u'k__Bacteria', u'p__Acidobacteria', u'c__iii1-8', u'o__SJA-36', u'f__', u'g__', u's__']
1047	New.CleanUp.ReferenceOTU283442$$[u'k__Bacteria', u'p__Planctomycetes', u'c__Phycisphaerae', u'o__WD2101', u'f__', u'g__', u's__']
1048	New.CleanUp.ReferenceOTU290000$$[u'k__Bacteria', u'p__Verrucomicrobia', u'c__[Pedosphaerae]', u'o__[Pedosphaerales]', u'f__Ellin517', u'g__', u's__']
1049	New.CleanUp.ReferenceOTU290667$$[u'k__Bacteria', u'p__Bacteroidetes', u'c__[Saprospirae]', u'o__[Saprospirales]', u'f__Chitinophagaceae']
1050	New.CleanUp.ReferenceOTU302026$$[u'k__Bacteria', u'p__Chloroflexi', u'c__Chloroflexi', u'o__Herpetosiphonales', u'f__', u'g__', u's__']
1051	New.CleanUp.ReferenceOTU305510$$[u'k__Bacteria', u'p__Nitrospirae', u'c__Nitrospira', u'o__Nitrospirales', u'f__Nitrospiraceae', u'g__Nitrospira', u's__']
1052	New.CleanUp.ReferenceOTU309217$$[u'k__Bacteria', u'p__OD1', u'c__ZB2', u'o__', u'f__', u'g__', u's__']
1053	New.CleanUp.ReferenceOTU315385$$[u'k__Bacteria', u'p__Proteobacteria', u'c__Betaproteobacteria', u'o__Burkholderiales', u'f__Comamonadaceae', u'g__Variovorax', u's__paradoxus']
1054	New.CleanUp.ReferenceOTU323304$$[u'k__Bacteria', u'p__Chlorobi', u'c__BSV26', u'o__A89', u'f__', u'g__', u's__']
1055	New.CleanUp.ReferenceOTU324872$$[u'k__Bacteria', u'p__Actinobacteria', u'c__Thermoleophilia', u'o__Gaiellales', u'f__Gaiellaceae', u'g__', u's__']
1056	New.CleanUp.ReferenceOTU325950$$[u'k__Bacteria', u'p__Actinobacteria', u'c__Actinobacteria', u'o__Actinomycetales']
1057	New.CleanUp.ReferenceOTU327894$$[u'k__Bacteria', u'p__Acidobacteria', u'c__Acidobacteria-6', u'o__iii1-15', u'f__mb2424', u'g__', u's__']
1058	New.CleanUp.ReferenceOTU334533$$[u'k__Bacteria', u'p__Acidobacteria', u'c__iii1-8', u'o__DS-18', u'f__', u'g__', u's__']
1059	New.CleanUp.ReferenceOTU335009$$[u'k__Bacteria', u'p__Bacteroidetes', u'c__[Saprospirae]', u'o__[Saprospirales]', u'f__Chitinophagaceae', u'g__', u's__']
1060	New.CleanUp.ReferenceOTU348985$$[u'k__Bacteria', u'p__Planctomycetes', u'c__Phycisphaerae', u'o__WD2101', u'f__', u'g__', u's__']
1061	New.CleanUp.ReferenceOTU354149$$[u'k__Bacteria', u'p__Firmicutes', u'c__Bacilli', u'o__Bacillales']
1062	New.CleanUp.ReferenceOTU373162$$[u'k__Bacteria', u'p__Proteobacteria', u'c__Gammaproteobacteria', u'o__', u'f__', u'g__', u's__']
1063	New.CleanUp.ReferenceOTU382110$$[u'k__Bacteria', u'p__Proteobacteria', u'c__Deltaproteobacteria', u'o__Myxococcales', u'f__', u'g__', u's__']
1064	New.CleanUp.ReferenceOTU382173$$[u'k__Bacteria', u'p__Proteobacteria', u'c__Deltaproteobacteria', u'o__Myxococcales', u'f__Haliangiaceae', u'g__', u's__']
1065	New.CleanUp.ReferenceOTU389071$$[u'k__Bacteria', u'p__Proteobacteria', u'c__Betaproteobacteria', u'o__', u'f__', u'g__', u's__']
1066	New.CleanUp.ReferenceOTU400998$$[u'k__Bacteria', u'p__Proteobacteria', u'c__Alphaproteobacteria', u'o__Sphingomonadales', u'f__Sphingomonadaceae', u'g__Kaistobacter', u's__']
1067	New.CleanUp.ReferenceOTU405262$$[u'k__Bacteria', u'p__Bacteroidetes', u'c__Sphingobacteriia', u'o__Sphingobacteriales', u'f__', u'g__', u's__']
1068	New.CleanUp.ReferenceOTU413696$$[u'k__Bacteria', u'p__Planctomycetes', u'c__Phycisphaerae', u'o__Phycisphaerales', u'f__', u'g__', u's__']
1069	New.CleanUp.ReferenceOTU413814$$[u'k__Bacteria', u'p__OD1', u'c__ZB2', u'o__', u'f__', u'g__', u's__']
1070	New.CleanUp.ReferenceOTU415538$$[u'k__Bacteria', u'p__Proteobacteria', u'c__Deltaproteobacteria', u'o__Myxococcales']
1071	New.CleanUp.ReferenceOTU417245$$[u'k__Bacteria', u'p__Planctomycetes', u'c__Planctomycetia', u'o__Gemmatales', u'f__Gemmataceae', u'g__Gemmata', u's__']
1072	New.CleanUp.ReferenceOTU417371$$[u'k__Bacteria', u'p__Chloroflexi', u'c__C0119', u'o__', u'f__', u'g__', u's__']
1073	New.CleanUp.ReferenceOTU418233$$[u'k__Bacteria', u'p__Chloroflexi', u'c__TK10', u'o__AKYG885', u'f__Dolo_23', u'g__', u's__']
1074	New.CleanUp.ReferenceOTU418808$$[u'k__Bacteria', u'p__Verrucomicrobia', u'c__[Pedosphaerae]', u'o__[Pedosphaerales]', u'f__auto67_4W', u'g__', u's__']
1075	New.CleanUp.ReferenceOTU420290$$[u'k__Bacteria', u'p__Planctomycetes', u'c__Planctomycetia', u'o__Pirellulales', u'f__Pirellulaceae', u'g__', u's__']
1076	New.CleanUp.ReferenceOTU420315$$[u'k__Bacteria', u'p__Actinobacteria', u'c__Actinobacteria', u'o__Actinomycetales', u'f__Mycobacteriaceae', u'g__Mycobacterium', u's__']
1077	New.CleanUp.ReferenceOTU422567$$[u'k__Bacteria', u'p__Proteobacteria', u'c__Alphaproteobacteria', u'o__Rhodospirillales', u'f__Rhodospirillaceae', u'g__', u's__']
1078	New.CleanUp.ReferenceOTU422986$$[u'k__Bacteria', u'p__Actinobacteria', u'c__Thermoleophilia', u'o__Solirubrobacterales', u'f__', u'g__', u's__']
1079	New.CleanUp.ReferenceOTU424106$$[u'k__Bacteria', u'p__Chloroflexi', u'c__Chloroflexi', u'o__Herpetosiphonales', u'f__', u'g__', u's__']
1080	New.CleanUp.ReferenceOTU425625$$[u'k__Bacteria', u'p__Planctomycetes', u'c__Phycisphaerae', u'o__Phycisphaerales', u'f__', u'g__', u's__']
1081	New.CleanUp.ReferenceOTU427021$$[u'k__Bacteria', u'p__Chloroflexi', u'c__Chloroflexi', u'o__[Roseiflexales]', u'f__', u'g__', u's__']
1082	New.CleanUp.ReferenceOTU440333$$[u'k__Bacteria', u'p__Proteobacteria', u'c__Alphaproteobacteria', u'o__Ellin329', u'f__', u'g__', u's__']
1083	New.CleanUp.ReferenceOTU440877$$[u'k__Bacteria', u'p__Bacteroidetes', u'c__[Saprospirae]', u'o__[Saprospirales]', u'f__Chitinophagaceae', u'g__', u's__']
1084	New.CleanUp.ReferenceOTU443955$$[u'k__Bacteria', u'p__Chloroflexi', u'c__C0119', u'o__', u'f__', u'g__', u's__']
1085	New.CleanUp.ReferenceOTU449424$$[u'k__Bacteria', u'p__Verrucomicrobia', u'c__[Pedosphaerae]', u'o__[Pedosphaerales]', u'f__Ellin517', u'g__', u's__']
1086	New.CleanUp.ReferenceOTU450377$$[u'k__Bacteria', u'p__Actinobacteria', u'c__Actinobacteria', u'o__Actinomycetales', u'f__Nocardiaceae']
1087	New.CleanUp.ReferenceOTU450426$$[u'k__Bacteria', u'p__Proteobacteria', u'c__Alphaproteobacteria', u'o__Rhodobacterales', u'f__Hyphomonadaceae', u'g__', u's__']
1088	New.CleanUp.ReferenceOTU456645$$[u'k__Bacteria', u'p__Acidobacteria', u'c__iii1-8', u'o__DS-18', u'f__', u'g__', u's__']
1089	New.CleanUp.ReferenceOTU461545$$[u'k__Bacteria', u'p__Acidobacteria', u'c__Acidobacteria-6', u'o__iii1-15', u'f__', u'g__', u's__']
1090	New.CleanUp.ReferenceOTU464225$$[u'k__Bacteria', u'p__Chloroflexi', u'c__S085', u'o__', u'f__', u'g__', u's__']
1091	New.CleanUp.ReferenceOTU471781$$[u'k__Bacteria', u'p__Bacteroidetes', u'c__[Saprospirae]', u'o__[Saprospirales]', u'f__Chitinophagaceae', u'g__Lacibacter', u's__cauensis']
1092	New.CleanUp.ReferenceOTU472103$$[u'k__Bacteria', u'p__Acidobacteria', u'c__iii1-8', u'o__DS-18', u'f__', u'g__', u's__']
1093	New.CleanUp.ReferenceOTU477785$$[u'k__Bacteria', u'p__Planctomycetes', u'c__Planctomycetia', u'o__Pirellulales', u'f__Pirellulaceae', u'g__', u's__']
1094	New.CleanUp.ReferenceOTU478244$$[u'k__Bacteria', u'p__Planctomycetes', u'c__Phycisphaerae', u'o__WD2101', u'f__', u'g__', u's__']
1095	New.CleanUp.ReferenceOTU481804$$[u'k__Bacteria', u'p__Acidobacteria', u'c__iii1-8', u'o__DS-18', u'f__', u'g__', u's__']
1096	New.CleanUp.ReferenceOTU485227$$[u'k__Bacteria', u'p__Verrucomicrobia', u'c__[Spartobacteria]', u'o__[Chthoniobacterales]', u'f__[Chthoniobacteraceae]', u'g__DA101', u's__']
1097	New.CleanUp.ReferenceOTU497297$$[u'k__Bacteria', u'p__Proteobacteria', u'c__Alphaproteobacteria', u'o__Sphingomonadales', u'f__Sphingomonadaceae', u'g__Kaistobacter', u's__']
1098	New.CleanUp.ReferenceOTU502813$$[u'k__Bacteria', u'p__Acidobacteria', u'c__Acidobacteria-6', u'o__iii1-15', u'f__mb2424', u'g__', u's__']
1099	New.CleanUp.ReferenceOTU506825$$[u'k__Bacteria', u'p__Verrucomicrobia', u'c__Opitutae', u'o__Opitutales', u'f__Opitutaceae', u'g__Opitutus', u's__']
1100	New.CleanUp.ReferenceOTU507005$$[u'k__Bacteria', u'p__Proteobacteria', u'c__Gammaproteobacteria', u'o__Xanthomonadales', u'f__Sinobacteraceae', u'g__', u's__']
1101	New.CleanUp.ReferenceOTU510977$$[u'k__Bacteria', u'p__TM7', u'c__TM7-1', u'o__', u'f__', u'g__', u's__']
1102	New.CleanUp.ReferenceOTU515237$$[u'k__Bacteria', u'p__Verrucomicrobia', u'c__[Spartobacteria]', u'o__[Chthoniobacterales]', u'f__[Chthoniobacteraceae]', u'g__DA101', u's__']
1103	New.CleanUp.ReferenceOTU518929$$[u'k__Bacteria', u'p__Bacteroidetes', u'c__[Saprospirae]', u'o__[Saprospirales]', u'f__Chitinophagaceae', u'g__', u's__']
1104	New.CleanUp.ReferenceOTU522485$$[u'k__Bacteria', u'p__Proteobacteria', u'c__Alphaproteobacteria', u'o__Rhodospirillales', u'f__Rhodospirillaceae', u'g__', u's__']
1105	New.CleanUp.ReferenceOTU522882$$[u'k__Bacteria', u'p__Bacteroidetes', u'c__Sphingobacteriia', u'o__Sphingobacteriales', u'f__', u'g__', u's__']
1106	New.CleanUp.ReferenceOTU537079$$[u'k__Bacteria', u'p__Planctomycetes', u'c__Phycisphaerae', u'o__WD2101', u'f__', u'g__', u's__']
1107	New.CleanUp.ReferenceOTU538082$$[u'k__Bacteria', u'p__Planctomycetes', u'c__Planctomycetia', u'o__Pirellulales', u'f__Pirellulaceae', u'g__', u's__']
1108	New.CleanUp.ReferenceOTU542364$$[u'k__Bacteria', u'p__Actinobacteria']
1109	New.CleanUp.ReferenceOTU555102$$[u'k__Bacteria', u'p__OD1']
1110	New.CleanUp.ReferenceOTU564967$$[u'k__Bacteria', u'p__Proteobacteria', u'c__Gammaproteobacteria', u'o__Xanthomonadales', u'f__Sinobacteraceae', u'g__', u's__']
1111	New.CleanUp.ReferenceOTU564985$$[u'k__Bacteria', u'p__Chloroflexi', u'c__Anaerolineae', u'o__envOPS12', u'f__', u'g__', u's__']
1112	New.CleanUp.ReferenceOTU570888$$[u'k__Bacteria', u'p__Acidobacteria', u'c__Acidobacteria-6', u'o__iii1-15', u'f__', u'g__', u's__']
1113	New.CleanUp.ReferenceOTU575594$$[u'k__Bacteria', u'p__Planctomycetes', u'c__Planctomycetia', u'o__Gemmatales', u'f__Gemmataceae', u'g__Gemmata', u's__']
1114	New.CleanUp.ReferenceOTU577299$$[u'k__Bacteria', u'p__Proteobacteria', u'c__Deltaproteobacteria', u'o__Myxococcales', u'f__Haliangiaceae', u'g__', u's__']
1115	New.CleanUp.ReferenceOTU583158$$[u'k__Bacteria', u'p__Verrucomicrobia', u'c__[Pedosphaerae]', u'o__[Pedosphaerales]']
1116	New.CleanUp.ReferenceOTU586484$$[u'k__Bacteria', u'p__Fibrobacteres', u'c__Fibrobacteria', u'o__258ds10', u'f__', u'g__', u's__']
1117	New.CleanUp.ReferenceOTU590306$$[u'k__Bacteria', u'p__Chlorobi', u'c__SJA-28', u'o__', u'f__', u'g__', u's__']
1118	New.CleanUp.ReferenceOTU590804$$[u'k__Bacteria', u'p__Verrucomicrobia', u'c__[Spartobacteria]', u'o__[Chthoniobacterales]', u'f__[Chthoniobacteraceae]', u'g__OR-59', u's__']
1119	New.CleanUp.ReferenceOTU596584$$[u'k__Bacteria', u'p__Proteobacteria', u'c__Alphaproteobacteria', u'o__Rhizobiales']
1120	New.CleanUp.ReferenceOTU597220$$[u'k__Bacteria', u'p__TM7', u'c__TM7-1', u'o__', u'f__', u'g__', u's__']
1121	New.CleanUp.ReferenceOTU615128$$[u'k__Bacteria', u'p__Proteobacteria', u'c__Deltaproteobacteria', u'o__Myxococcales', u'f__OM27', u'g__', u's__']
1122	New.CleanUp.ReferenceOTU615890$$[u'k__Bacteria', u'p__Proteobacteria', u'c__Gammaproteobacteria', u'o__Enterobacteriales', u'f__Enterobacteriaceae', u'g__Escherichia', u's__coli']
1123	New.CleanUp.ReferenceOTU615946$$[u'k__Bacteria', u'p__Planctomycetes', u'c__Phycisphaerae', u'o__WD2101', u'f__', u'g__', u's__']
1124	New.CleanUp.ReferenceOTU624725$$[u'k__Bacteria', u'p__Proteobacteria', u'c__Betaproteobacteria', u'o__Burkholderiales', u'f__Oxalobacteraceae']
1125	New.CleanUp.ReferenceOTU625116$$[u'k__Bacteria', u'p__Chloroflexi', u'c__Anaerolineae', u'o__A31', u'f__S47', u'g__', u's__']
1126	New.CleanUp.ReferenceOTU630717$$[u'k__Bacteria', u'p__Firmicutes', u'c__Bacilli', u'o__Bacillales', u'f__Planococcaceae', u'g__Sporosarcina', u's__']
1127	New.CleanUp.ReferenceOTU637454$$[u'k__Bacteria', u'p__Actinobacteria', u'c__Actinobacteria', u'o__Actinomycetales', u'f__Nakamurellaceae', u'g__', u's__']
1128	New.CleanUp.ReferenceOTU637787$$[u'k__Bacteria', u'p__Proteobacteria', u'c__Gammaproteobacteria', u'o__Xanthomonadales', u'f__Xanthomonadaceae', u'g__Rhodanobacter', u's__']
1129	New.CleanUp.ReferenceOTU641734$$[u'k__Bacteria', u'p__TM7', u'c__TM7-1', u'o__', u'f__', u'g__', u's__']
1130	New.CleanUp.ReferenceOTU645242$$[u'k__Bacteria', u'p__Proteobacteria', u'c__Alphaproteobacteria', u'o__', u'f__', u'g__', u's__']
1131	New.CleanUp.ReferenceOTU648817$$[u'k__Bacteria', u'p__Verrucomicrobia', u'c__[Spartobacteria]', u'o__[Chthoniobacterales]', u'f__[Chthoniobacteraceae]', u'g__DA101', u's__']
1132	New.CleanUp.ReferenceOTU656741$$[u'k__Bacteria', u'p__Proteobacteria', u'c__Deltaproteobacteria', u'o__Myxococcales', u'f__', u'g__', u's__']
1133	New.CleanUp.ReferenceOTU658024$$[u'k__Bacteria', u'p__Acidobacteria', u'c__Acidobacteria-6', u'o__iii1-15', u'f__', u'g__', u's__']
1134	New.CleanUp.ReferenceOTU659532$$[u'k__Bacteria', u'p__Planctomycetes', u'c__Phycisphaerae', u'o__WD2101', u'f__', u'g__', u's__']
1135	New.CleanUp.ReferenceOTU660805$$[u'k__Bacteria', u'p__Verrucomicrobia', u'c__[Spartobacteria]', u'o__[Chthoniobacterales]', u'f__[Chthoniobacteraceae]', u'g__DA101', u's__']
1136	New.CleanUp.ReferenceOTU662425$$[u'k__Bacteria', u'p__Planctomycetes', u'c__Planctomycetia', u'o__Gemmatales', u'f__Gemmataceae', u'g__', u's__']
1137	New.CleanUp.ReferenceOTU669792$$[u'k__Bacteria', u'p__Proteobacteria', u'c__Alphaproteobacteria', u'o__Sphingomonadales']
1138	New.CleanUp.ReferenceOTU670082$$[u'k__Bacteria', u'p__Acidobacteria', u'c__iii1-8', u'o__DS-18', u'f__', u'g__', u's__']
1139	New.CleanUp.ReferenceOTU675119$$[u'k__Bacteria', u'p__Chloroflexi', u'c__Chloroflexi', u'o__[Roseiflexales]', u'f__[Kouleothrixaceae]', u'g__', u's__']
1140	New.CleanUp.ReferenceOTU676331$$[u'k__Bacteria', u'p__Planctomycetes', u'c__Planctomycetia', u'o__Planctomycetales', u'f__Planctomycetaceae', u'g__Planctomyces', u's__']
1141	New.CleanUp.ReferenceOTU679060$$[u'k__Bacteria', u'p__Bacteroidetes', u'c__[Saprospirae]', u'o__[Saprospirales]', u'f__Chitinophagaceae', u'g__', u's__']
1142	New.CleanUp.ReferenceOTU681196$$[u'k__Bacteria', u'p__Planctomycetes', u'c__Phycisphaerae', u'o__mle1-8', u'f__', u'g__', u's__']
1143	New.CleanUp.ReferenceOTU682766$$[u'k__Bacteria', u'p__Actinobacteria', u'c__Thermoleophilia', u'o__Gaiellales', u'f__Gaiellaceae', u'g__', u's__']
1144	New.CleanUp.ReferenceOTU683033$$[u'k__Bacteria', u'p__Planctomycetes', u'c__Phycisphaerae', u'o__WD2101', u'f__', u'g__', u's__']
1145	New.CleanUp.ReferenceOTU690273$$[u'k__Bacteria', u'p__Proteobacteria', u'c__Deltaproteobacteria', u'o__NB1-j', u'f__', u'g__', u's__']
1146	New.CleanUp.ReferenceOTU701051$$[u'k__Bacteria', u'p__Bacteroidetes', u'c__[Saprospirae]', u'o__[Saprospirales]', u'f__Saprospiraceae', u'g__', u's__']
1147	New.CleanUp.ReferenceOTU701883$$[u'k__Bacteria', u'p__Actinobacteria', u'c__Actinobacteria', u'o__Actinomycetales', u'f__Pseudonocardiaceae', u'g__Amycolatopsis', u's__']
1148	New.CleanUp.ReferenceOTU705313$$[u'k__Bacteria', u'p__Actinobacteria', u'c__Thermoleophilia', u'o__Gaiellales', u'f__Gaiellaceae', u'g__', u's__']
1149	New.CleanUp.ReferenceOTU712027$$[u'k__Bacteria', u'p__Proteobacteria', u'c__Alphaproteobacteria', u'o__Rhodobacterales', u'f__Rhodobacteraceae']
1150	New.CleanUp.ReferenceOTU717841$$[u'k__Bacteria', u'p__Actinobacteria', u'c__Acidimicrobiia', u'o__Acidimicrobiales', u'f__', u'g__', u's__']
1151	New.CleanUp.ReferenceOTU721574$$[u'k__Bacteria', u'p__Proteobacteria', u'c__Alphaproteobacteria']
1152	New.CleanUp.ReferenceOTU731290$$[u'k__Bacteria', u'p__Proteobacteria', u'c__Gammaproteobacteria', u'o__Xanthomonadales', u'f__Sinobacteraceae', u'g__', u's__']
1153	New.CleanUp.ReferenceOTU732617$$[u'k__Bacteria', u'p__Bacteroidetes', u'c__[Saprospirae]', u'o__[Saprospirales]', u'f__Chitinophagaceae', u'g__', u's__']
1154	New.CleanUp.ReferenceOTU736684$$[u'k__Bacteria', u'p__Acidobacteria', u'c__Acidobacteria-6', u'o__CCU21', u'f__', u'g__', u's__']
1155	New.CleanUp.ReferenceOTU738736$$[u'k__Bacteria', u'p__Verrucomicrobia', u'c__[Spartobacteria]', u'o__[Chthoniobacterales]', u'f__[Chthoniobacteraceae]']
1156	New.CleanUp.ReferenceOTU748039$$[u'k__Bacteria', u'p__Planctomycetes', u'c__Phycisphaerae', u'o__WD2101', u'f__', u'g__', u's__']
1157	259049$$[u'k__Bacteria', u'p__Proteobacteria', u'c__Alphaproteobacteria', u'o__Rhodospirillales', u'f__Rhodospirillaceae', u'g__Magnetospirillum', u's__']
1158	203611$$[u'k__Bacteria', u'p__Proteobacteria', u'c__Alphaproteobacteria', u'o__Rhizobiales', u'f__Hyphomicrobiaceae']
1159	112952$$[u'k__Bacteria', u'p__Chloroflexi', u'c__Ellin6529', u'o__', u'f__', u'g__', u's__']
1160	4419153$$[u'k__Bacteria', u'p__Acidobacteria', u'c__Acidobacteria-6', u'o__iii1-15', u'f__', u'g__', u's__']
1161	1020633$$[u'k__Bacteria', u'p__Planctomycetes', u'c__Planctomycetia', u'o__Gemmatales', u'f__Isosphaeraceae', u'g__', u's__']
1162	4409934$$[u'k__Bacteria', u'p__Proteobacteria', u'c__Deltaproteobacteria', u'o__Desulfobacterales', u'f__Desulfobulbaceae', u'g__', u's__']
1163	369289$$[u'k__Bacteria', u'p__Actinobacteria', u'c__Actinobacteria', u'o__Actinomycetales', u'f__Micromonosporaceae']
1164	262096$$[u'k__Bacteria', u'p__Actinobacteria', u'c__Actinobacteria', u'o__Actinomycetales', u'f__Streptosporangiaceae', u'g__Streptosporangium', u's__']
1165	65691$$[u'k__Bacteria', u'p__Chloroflexi', u'c__S085', u'o__', u'f__', u'g__', u's__']
1166	205391$$[u'k__Bacteria', u'p__Acidobacteria', u'c__Solibacteres', u'o__Solibacterales', u'f__', u'g__', u's__']
1167	4414775$$[u'k__Bacteria', u'p__Proteobacteria', u'c__Alphaproteobacteria', u'o__Rhizobiales', u'f__Hyphomicrobiaceae', u'g__Rhodoplanes', u's__']
1168	4378219$$[u'k__Bacteria', u'p__Acidobacteria', u'c__Acidobacteria-6', u'o__iii1-15', u'f__mb2424', u'g__', u's__']
1169	511514$$[u'k__Bacteria', u'p__Gemmatimonadetes', u'c__Gemmatimonadetes', u'o__Ellin5290', u'f__', u'g__', u's__']
1170	941803$$[u'k__Bacteria', u'p__Proteobacteria', u'c__Alphaproteobacteria', u'o__Sphingomonadales', u'f__Sphingomonadaceae', u'g__Novosphingobium', u's__']
1171	217201$$[u'k__Bacteria', u'p__Proteobacteria', u'c__Alphaproteobacteria', u'o__Rhodospirillales', u'f__Rhodospirillaceae', u'g__', u's__']
1172	328181$$[u'k__Bacteria', u'p__Proteobacteria', u'c__Betaproteobacteria', u'o__SC-I-84', u'f__', u'g__', u's__']
1173	4367378$$[u'k__Bacteria', u'p__Proteobacteria', u'c__Deltaproteobacteria', u'o__Desulfuromonadales']
1174	145578$$[u'k__Bacteria', u'p__Actinobacteria', u'c__Actinobacteria', u'o__Actinomycetales', u'f__Micromonosporaceae', u'g__Catellatospora', u's__']
1175	812224$$[u'k__Bacteria', u'p__Proteobacteria', u'c__Deltaproteobacteria', u'o__Myxococcales', u'f__Haliangiaceae', u'g__', u's__']
1176	4298215$$[u'k__Bacteria', u'p__Proteobacteria', u'c__Alphaproteobacteria', u'o__Rhodospirillales', u'f__Rhodospirillaceae', u'g__', u's__']
1177	4346395$$[u'k__Bacteria', u'p__Proteobacteria', u'c__Deltaproteobacteria', u'o__Desulfuromonadales', u'f__Geobacteraceae', u'g__Geobacter', u's__']
1178	4447718$$[u'k__Bacteria', u'p__Verrucomicrobia', u'c__[Pedosphaerae]', u'o__[Pedosphaerales]', u'f__Ellin515', u'g__', u's__']
1179	4336414$$[u'k__Bacteria', u'p__Proteobacteria', u'c__Deltaproteobacteria', u'o__Desulfobacterales', u'f__Desulfobulbaceae', u'g__Desulfobulbus', u's__']
1180	133306$$[u'k__Bacteria', u'p__Actinobacteria', u'c__Actinobacteria', u'o__Actinomycetales', u'f__Nocardioidaceae', u'g__', u's__']
1181	204108$$[u'k__Bacteria', u'p__Gemmatimonadetes', u'c__Gemm-1', u'o__', u'f__', u'g__', u's__']
1182	243855$$[u'k__Bacteria', u'p__Proteobacteria', u'c__Deltaproteobacteria', u'o__[Entotheonellales]', u'f__[Entotheonellaceae]', u'g__', u's__']
1183	662695$$[u'k__Bacteria', u'p__Proteobacteria', u'c__Alphaproteobacteria', u'o__Sphingomonadales', u'f__Sphingomonadaceae', u'g__Kaistobacter', u's__']
1184	615729$$[u'k__Bacteria', u'p__Actinobacteria', u'c__Acidimicrobiia', u'o__Acidimicrobiales']
1185	239128$$[u'k__Bacteria', u'p__Proteobacteria', u'c__Betaproteobacteria', u'o__Rhodocyclales', u'f__Rhodocyclaceae']
1186	927367$$[u'k__Bacteria', u'p__Actinobacteria', u'c__Thermoleophilia', u'o__Solirubrobacterales']
1187	4458300$$[u'k__Bacteria', u'p__Proteobacteria', u'c__Betaproteobacteria', u'o__Rhodocyclales', u'f__Rhodocyclaceae']
1188	4446108$$[u'k__Bacteria', u'p__Actinobacteria', u'c__Actinobacteria', u'o__Actinomycetales', u'f__Microbacteriaceae', u'g__Agromyces', u's__']
1189	1015017$$[u'k__Bacteria', u'p__Proteobacteria', u'c__Deltaproteobacteria', u'o__Myxococcales', u'f__Nannocystaceae', u'g__Nannocystis', u's__exedens']
1190	4377284$$[u'k__Bacteria', u'p__Proteobacteria', u'c__Alphaproteobacteria', u'o__Rhodospirillales', u'f__Rhodospirillaceae', u'g__', u's__']
1191	4301261$$[u'k__Bacteria', u'p__Proteobacteria', u'c__Betaproteobacteria', u'o__', u'f__', u'g__', u's__']
1192	4203522$$[u'k__Bacteria', u'p__Acidobacteria', u'c__Solibacteres', u'o__Solibacterales', u'f__', u'g__', u's__']
1193	362845$$[u'k__Bacteria', u'p__Proteobacteria', u'c__Alphaproteobacteria', u'o__Rhodospirillales', u'f__Rhodospirillaceae', u'g__', u's__']
1194	754410$$[u'k__Bacteria', u'p__Proteobacteria', u'c__Alphaproteobacteria', u'o__Sphingomonadales', u'f__Sphingomonadaceae']
1195	2578357$$[u'k__Bacteria', u'p__Acidobacteria', u'c__DA052', u'o__Ellin6513', u'f__', u'g__', u's__']
1196	4419835$$[u'k__Bacteria', u'p__Nitrospirae', u'c__Nitrospira', u'o__Nitrospirales', u'f__Nitrospiraceae', u'g__Nitrospira', u's__']
1197	90390$$[u'k__Bacteria', u'p__Proteobacteria', u'c__Gammaproteobacteria', u'o__Alteromonadales', u'f__Alteromonadaceae', u'g__Cellvibrio', u's__']
1198	290401$$[u'k__Bacteria', u'p__Bacteroidetes', u'c__[Saprospirae]', u'o__[Saprospirales]', u'f__Chitinophagaceae', u'g__Lacibacter', u's__cauensis']
1199	215449$$[u'k__Bacteria', u'p__Proteobacteria', u'c__Betaproteobacteria', u'o__A21b', u'f__EB1003', u'g__', u's__']
1200	817861$$[u'k__Bacteria', u'p__Proteobacteria', u'c__Alphaproteobacteria', u'o__BD7-3', u'f__', u'g__', u's__']
1201	868555$$[u'k__Bacteria', u'p__Planctomycetes', u'c__Planctomycetia', u'o__Gemmatales', u'f__Isosphaeraceae']
1202	591340$$[u'k__Bacteria', u'p__Proteobacteria', u'c__Betaproteobacteria', u'o__Ellin6067', u'f__', u'g__', u's__']
1203	4435493$$[u'k__Bacteria', u'p__Proteobacteria', u'c__Deltaproteobacteria', u'o__Desulfobacterales', u'f__Desulfobulbaceae', u'g__', u's__']
1204	128235$$[u'k__Bacteria', u'p__Gemmatimonadetes', u'c__Gemm-1', u'o__', u'f__', u'g__', u's__']
1205	3691868$$[u'k__Bacteria', u'p__Acidobacteria', u'c__[Chloracidobacteria]', u'o__PK29', u'f__', u'g__', u's__']
1206	955576$$[u'k__Bacteria', u'p__Proteobacteria', u'c__Alphaproteobacteria', u'o__Rhodospirillales', u'f__', u'g__', u's__']
1207	4308094$$[u'k__Bacteria', u'p__Actinobacteria', u'c__Actinobacteria', u'o__Actinomycetales', u'f__Streptomycetaceae', u'g__Streptomyces', u's__']
1208	250328$$[u'k__Bacteria', u'p__Planctomycetes', u'c__Planctomycetia', u'o__Pirellulales', u'f__Pirellulaceae', u'g__', u's__']
1209	1109633$$[u'k__Bacteria', u'p__Acidobacteria', u'c__Solibacteres', u'o__Solibacterales', u'f__', u'g__', u's__']
1210	249425$$[u'k__Bacteria', u'p__Proteobacteria', u'c__Deltaproteobacteria', u'o__Myxococcales', u'f__', u'g__', u's__']
1211	4416961$$[u'k__Bacteria', u'p__Planctomycetes', u'c__Phycisphaerae', u'o__WD2101', u'f__', u'g__', u's__']
1212	216839$$[u'k__Bacteria', u'p__Chloroflexi', u'c__TK10', u'o__AKYG885', u'f__Dolo_23', u'g__', u's__']
1213	255057$$[u'k__Bacteria', u'p__WS3', u'c__PRR-12', u'o__LD1-PA13', u'f__', u'g__', u's__']
1214	968261$$[u'k__Bacteria', u'p__Actinobacteria', u'c__Thermoleophilia', u'o__Solirubrobacterales', u'f__', u'g__', u's__']
1215	104265$$[u'k__Bacteria', u'p__Actinobacteria', u'c__Actinobacteria', u'o__Actinomycetales']
1216	2733658$$[u'k__Bacteria', u'p__Acidobacteria', u'c__Acidobacteria-6', u'o__iii1-15', u'f__RB40', u'g__', u's__']
1217	711023$$[u'k__Bacteria', u'p__Proteobacteria', u'c__Gammaproteobacteria', u'o__Xanthomonadales', u'f__Xanthomonadaceae', u'g__Thermomonas', u's__']
1218	4290381$$[u'k__Bacteria', u'p__Proteobacteria', u'c__Alphaproteobacteria', u'o__Rhodobacterales', u'f__Hyphomonadaceae', u'g__', u's__']
1219	585070$$[u'k__Bacteria', u'p__Proteobacteria', u'c__Alphaproteobacteria', u'o__Sphingomonadales', u'f__Sphingomonadaceae']
1220	214676$$[u'k__Bacteria', u'p__Gemmatimonadetes', u'c__Gemmatimonadetes', u'o__N1423WL', u'f__', u'g__', u's__']
1221	777827$$[u'k__Bacteria', u'p__Bacteroidetes', u'c__Flavobacteriia', u'o__Flavobacteriales', u'f__Cryomorphaceae', u'g__', u's__']
1222	4440462$$[u'k__Bacteria', u'p__Actinobacteria', u'c__MB-A2-108', u'o__0319-7L14', u'f__', u'g__', u's__']
1223	4434910$$[u'k__Bacteria', u'p__Actinobacteria', u'c__Acidimicrobiia', u'o__Acidimicrobiales', u'f__', u'g__', u's__']
1224	4413363$$[u'k__Bacteria', u'p__Proteobacteria', u'c__Gammaproteobacteria', u'o__Xanthomonadales', u'f__Sinobacteraceae', u'g__', u's__']
1225	221791$$[u'k__Bacteria', u'p__Acidobacteria', u'c__iii1-8', u'o__32-20', u'f__', u'g__', u's__']
1226	4827$$[u'k__Bacteria', u'p__Proteobacteria', u'c__Alphaproteobacteria', u'o__Rhizobiales']
1227	47512$$[u'k__Bacteria', u'p__Proteobacteria', u'c__Betaproteobacteria', u'o__Burkholderiales', u'f__Comamonadaceae', u'g__Hydrogenophaga', u's__']
1228	4454496$$[u'k__Bacteria', u'p__Proteobacteria', u'c__Deltaproteobacteria', u'o__Desulfobacterales', u'f__Desulfobulbaceae', u'g__', u's__']
1229	332316$$[u'k__Bacteria', u'p__Acidobacteria', u'c__Sva0725', u'o__Sva0725', u'f__', u'g__', u's__']
1230	962448$$[u'k__Bacteria', u'p__Planctomycetes', u'c__Planctomycetia', u'o__Gemmatales', u'f__Gemmataceae', u'g__Gemmata', u's__']
1231	30991$$[u'k__Bacteria', u'p__Proteobacteria', u'c__Deltaproteobacteria', u'o__Myxococcales', u'f__Haliangiaceae', u'g__', u's__']
1232	89580$$[u'k__Bacteria', u'p__Acidobacteria', u'c__Acidobacteria-6', u'o__iii1-15', u'f__', u'g__', u's__']
1233	561452$$[u'k__Bacteria', u'p__Actinobacteria', u'c__Thermoleophilia', u'o__Gaiellales', u'f__Gaiellaceae', u'g__', u's__']
1234	751207$$[u'k__Bacteria', u'p__Proteobacteria', u'c__Betaproteobacteria', u'o__Burkholderiales', u'f__Comamonadaceae']
1235	566185$$[u'k__Bacteria', u'p__Planctomycetes', u'c__Planctomycetia', u'o__Pirellulales', u'f__Pirellulaceae', u'g__', u's__']
1236	4312335$$[u'k__Bacteria', u'p__Proteobacteria', u'c__Betaproteobacteria', u'o__Burkholderiales', u'f__Comamonadaceae', u'g__Methylibium']
1237	649722$$[u'k__Bacteria', u'p__Proteobacteria', u'c__Deltaproteobacteria', u'o__Myxococcales', u'f__Haliangiaceae', u'g__', u's__']
1238	223904$$[u'k__Bacteria', u'p__Acidobacteria', u'c__Acidobacteriia', u'o__Acidobacteriales', u'f__Koribacteraceae', u'g__Candidatus Koribacter']
1239	4362483$$[u'k__Bacteria', u'p__Proteobacteria', u'c__Alphaproteobacteria', u'o__Rhizobiales', u'f__Hyphomicrobiaceae', u'g__Hyphomicrobium']
1240	4373459$$[u'k__Bacteria', u'p__Acidobacteria', u'c__Acidobacteria-6', u'o__iii1-15', u'f__', u'g__', u's__']
1241	1052235$$[u'k__Bacteria', u'p__Proteobacteria', u'c__Deltaproteobacteria', u'o__Myxococcales', u'f__Haliangiaceae', u'g__', u's__']
1242	220524$$[u'k__Bacteria', u'p__Actinobacteria', u'c__Actinobacteria', u'o__Actinomycetales', u'f__Nakamurellaceae', u'g__', u's__']
1243	311659$$[u'k__Bacteria', u'p__Nitrospirae', u'c__Nitrospira', u'o__Nitrospirales', u'f__0319-6A21', u'g__', u's__']
1244	1105745$$[u'k__Bacteria', u'p__Gemmatimonadetes', u'c__Gemmatimonadetes', u'o__Ellin5290', u'f__', u'g__', u's__']
1245	352247$$[u'k__Bacteria', u'p__Proteobacteria', u'c__Alphaproteobacteria', u'o__Rhizobiales', u'f__', u'g__', u's__']
1246	3893865$$[u'k__Bacteria', u'p__Proteobacteria', u'c__Betaproteobacteria', u'o__SBla14', u'f__', u'g__', u's__']
1247	4324733$$[u'k__Bacteria', u'p__Proteobacteria', u'c__Alphaproteobacteria', u'o__Sphingomonadales', u'f__Sphingomonadaceae', u'g__', u's__']
1248	4302179$$[u'k__Bacteria', u'p__Proteobacteria', u'c__Alphaproteobacteria', u'o__Rhizobiales', u'f__Hyphomicrobiaceae', u'g__Rhodoplanes', u's__']
1249	4331815$$[u'k__Bacteria', u'p__Proteobacteria', u'c__Alphaproteobacteria', u'o__Sphingomonadales', u'f__Sphingomonadaceae']
1250	557323$$[u'k__Bacteria', u'p__Bacteroidetes', u'c__[Saprospirae]', u'o__[Saprospirales]', u'f__Chitinophagaceae', u'g__', u's__']
1251	4361801$$[u'k__Bacteria', u'p__Acidobacteria', u'c__Acidobacteria-6']
1252	4330205$$[u'k__Bacteria', u'p__Proteobacteria', u'c__Alphaproteobacteria', u'o__Rhizobiales']
1253	593908$$[u'k__Bacteria', u'p__Proteobacteria', u'c__Gammaproteobacteria', u'o__Xanthomonadales', u'f__Xanthomonadaceae', u'g__', u's__']
1254	217034$$[u'k__Bacteria', u'p__Actinobacteria', u'c__Acidimicrobiia', u'o__Acidimicrobiales', u'f__', u'g__', u's__']
1255	1023338$$[u'k__Bacteria', u'p__Planctomycetes', u'c__Phycisphaerae', u'o__WD2101', u'f__', u'g__', u's__']
1256	4444121$$[u'k__Bacteria', u'p__Actinobacteria', u'c__Thermoleophilia', u'o__Gaiellales', u'f__Gaiellaceae', u'g__', u's__']
1257	4399780$$[u'k__Bacteria', u'p__Proteobacteria', u'c__Alphaproteobacteria', u'o__Rhodospirillales', u'f__Rhodospirillaceae', u'g__Azospirillum', u's__']
1258	4450089$$[u'k__Bacteria', u'p__Proteobacteria', u'c__Gammaproteobacteria', u'o__Xanthomonadales', u'f__Xanthomonadaceae']
1259	4329093$$[u'k__Bacteria', u'p__Proteobacteria', u'c__Alphaproteobacteria', u'o__Rhizobiales', u'f__Rhizobiaceae']
1260	2470350$$[u'k__Bacteria', u'p__Chloroflexi', u'c__Anaerolineae', u'o__Caldilineales', u'f__Caldilineaceae', u'g__', u's__']
1261	4473154$$[u'k__Bacteria', u'p__Proteobacteria', u'c__Alphaproteobacteria', u'o__Rhizobiales', u'f__', u'g__', u's__']
1262	3124136$$[u'k__Bacteria', u'p__Proteobacteria', u'c__Alphaproteobacteria', u'o__Rhizobiales', u'f__Hyphomicrobiaceae', u'g__Rhodoplanes', u's__']
1263	373239$$[u'k__Bacteria', u'p__Actinobacteria', u'c__Actinobacteria', u'o__Actinomycetales']
1264	2640121$$[u'k__Bacteria', u'p__Planctomycetes', u'c__OM190', u'o__CL500-15', u'f__', u'g__', u's__']
1265	359864$$[u'k__Bacteria', u'p__Proteobacteria', u'c__Betaproteobacteria', u'o__SC-I-84', u'f__', u'g__', u's__']
1266	904212$$[u'k__Bacteria', u'p__Actinobacteria', u'c__Acidimicrobiia', u'o__Acidimicrobiales']
1267	1114878$$[u'k__Bacteria', u'p__Proteobacteria', u'c__Deltaproteobacteria', u'o__Desulfuromonadales', u'f__Geobacteraceae', u'g__', u's__']
1268	4434347$$[u'k__Bacteria', u'p__Acidobacteria', u'c__Acidobacteria-6', u'o__iii1-15', u'f__', u'g__', u's__']
1269	931045$$[u'k__Bacteria', u'p__Actinobacteria', u'c__Thermoleophilia', u'o__Solirubrobacterales', u'f__', u'g__', u's__']
1270	366443$$[u'k__Bacteria', u'p__Chloroflexi', u'c__Ellin6529', u'o__', u'f__', u'g__', u's__']
1271	1785533$$[u'k__Bacteria', u'p__Acidobacteria', u'c__Acidobacteria-6', u'o__iii1-15', u'f__', u'g__', u's__']
1272	4340285$$[u'k__Bacteria', u'p__Acidobacteria', u'c__Acidobacteria-6', u'o__iii1-15', u'f__', u'g__', u's__']
1273	564526$$[u'k__Bacteria', u'p__Acidobacteria', u'c__Acidobacteria-6', u'o__iii1-15', u'f__', u'g__', u's__']
1274	362426$$[u'k__Bacteria', u'p__Proteobacteria', u'c__Betaproteobacteria', u'o__Burkholderiales', u'f__Burkholderiaceae']
1275	4447720$$[u'k__Bacteria', u'p__Armatimonadetes', u'c__[Fimbriimonadia]', u'o__[Fimbriimonadales]', u'f__[Fimbriimonadaceae]']
1276	321885$$[u'k__Bacteria', u'p__Planctomycetes', u'c__Planctomycetia', u'o__Gemmatales', u'f__Gemmataceae', u'g__', u's__']
1277	1145388$$[u'k__Bacteria', u'p__Chloroflexi', u'c__Gitt-GS-136', u'o__', u'f__', u'g__', u's__']
1278	242136$$[u'k__Bacteria', u'p__Bacteroidetes', u'c__Sphingobacteriia', u'o__Sphingobacteriales', u'f__', u'g__', u's__']
1279	4476079$$[u'k__Bacteria', u'p__Actinobacteria', u'c__Thermoleophilia', u'o__Solirubrobacterales', u'f__', u'g__', u's__']
1280	4462155$$[u'k__Bacteria', u'p__Proteobacteria', u'c__Betaproteobacteria', u'o__Burkholderiales', u'f__Comamonadaceae']
1281	237185$$[u'k__Bacteria', u'p__Planctomycetes', u'c__Phycisphaerae', u'o__WD2101', u'f__', u'g__', u's__']
1282	1123057$$[u'k__Bacteria', u'p__Actinobacteria', u'c__Acidimicrobiia', u'o__Acidimicrobiales', u'f__EB1017', u'g__', u's__']
1283	322668$$[u'k__Bacteria', u'p__Acidobacteria', u'c__Acidobacteria-6', u'o__iii1-15', u'f__', u'g__', u's__']
1284	527968$$[u'k__Bacteria', u'p__Planctomycetes', u'c__', u'o__', u'f__', u'g__', u's__']
1285	93360$$[u'k__Bacteria', u'p__Actinobacteria', u'c__Actinobacteria', u'o__Actinomycetales', u'f__Micromonosporaceae', u'g__', u's__']
1286	510471$$[u'k__Bacteria', u'p__Chloroflexi', u'c__Chloroflexi', u'o__[Roseiflexales]', u'f__[Kouleothrixaceae]', u'g__', u's__']
1287	370425$$[u'k__Bacteria', u'p__Actinobacteria', u'c__Thermoleophilia', u'o__Gaiellales', u'f__', u'g__', u's__']
1288	3783163$$[u'k__Bacteria', u'p__Proteobacteria', u'c__Alphaproteobacteria', u'o__Sphingomonadales', u'f__Sphingomonadaceae']
1289	4314932$$[u'k__Bacteria', u'p__Nitrospirae', u'c__Nitrospira', u'o__Nitrospirales', u'f__0319-6A21', u'g__', u's__']
1290	2718809$$[u'k__Bacteria', u'p__Planctomycetes', u'c__Planctomycetia', u'o__Gemmatales', u'f__Gemmataceae', u'g__Gemmata', u's__']
1291	37092$$[u'k__Bacteria', u'p__Proteobacteria', u'c__Alphaproteobacteria', u'o__Sphingomonadales', u'f__Sphingomonadaceae', u'g__Novosphingobium', u's__']
1292	226718$$[u'k__Bacteria', u'p__Proteobacteria', u'c__Betaproteobacteria', u'o__Ellin6067', u'f__', u'g__', u's__']
1293	4368625$$[u'k__Bacteria', u'p__Acidobacteria', u'c__Acidobacteria-6', u'o__iii1-15', u'f__RB40', u'g__', u's__']
1294	239159$$[u'k__Bacteria', u'p__Verrucomicrobia', u'c__[Pedosphaerae]', u'o__[Pedosphaerales]', u'f__', u'g__', u's__']
1295	4378898$$[u'k__Bacteria', u'p__Proteobacteria', u'c__Alphaproteobacteria', u'o__Rhizobiales']
1296	557467$$[u'k__Bacteria', u'p__Gemmatimonadetes', u'c__Gemmatimonadetes', u'o__Gemmatimonadales', u'f__Ellin5301', u'g__', u's__']
1297	2838672$$[u'k__Bacteria', u'p__Proteobacteria', u'c__Betaproteobacteria', u'o__Burkholderiales', u'f__Alcaligenaceae', u'g__', u's__']
1298	113715$$[u'k__Bacteria', u'p__Acidobacteria', u'c__[Chloracidobacteria]', u'o__RB41', u'f__Ellin6075', u'g__', u's__']
1299	4454893$$[u'k__Bacteria', u'p__Bacteroidetes', u'c__Flavobacteriia', u'o__Flavobacteriales', u'f__Flavobacteriaceae', u'g__Flavobacterium', u's__']
1300	105453$$[u'k__Bacteria', u'p__Acidobacteria', u'c__Solibacteres', u'o__Solibacterales', u'f__', u'g__', u's__']
1301	207320$$[u'k__Bacteria', u'p__Proteobacteria', u'c__Betaproteobacteria', u'o__SC-I-84', u'f__', u'g__', u's__']
1302	564093$$[u'k__Bacteria', u'p__Actinobacteria', u'c__Actinobacteria', u'o__Actinomycetales', u'f__Micromonosporaceae', u'g__Virgisporangium', u's__ochraceum']
1303	591358$$[u'k__Bacteria', u'p__Planctomycetes', u'c__Planctomycetia', u'o__Gemmatales', u'f__Gemmataceae', u'g__Gemmata', u's__']
1304	4354531$$[u'k__Bacteria', u'p__Planctomycetes', u'c__Planctomycetia', u'o__Pirellulales', u'f__Pirellulaceae']
1305	4393265$$[u'k__Bacteria', u'p__Proteobacteria', u'c__Betaproteobacteria', u'o__MND1', u'f__', u'g__', u's__']
1306	50120$$[u'k__Bacteria', u'p__Firmicutes', u'c__Clostridia', u'o__Clostridiales']
1307	4474906$$[u'k__Bacteria', u'p__Planctomycetes', u'c__Planctomycetia', u'o__Gemmatales', u'f__Isosphaeraceae', u'g__', u's__']
1308	240045$$[u'k__Bacteria', u'p__Proteobacteria', u'c__Deltaproteobacteria', u'o__Myxococcales', u'f__Haliangiaceae', u'g__', u's__']
1309	4389607$$[u'k__Bacteria', u'p__Bacteroidetes', u'c__Bacteroidia', u'o__Bacteroidales', u'f__', u'g__', u's__']
1310	144253$$[u'k__Bacteria', u'p__WS3', u'c__PRR-12', u'o__Sediment-1', u'f__', u'g__', u's__']
1311	4345361$$[u'k__Bacteria', u'p__Acidobacteria', u'c__Sva0725', u'o__Sva0725', u'f__', u'g__', u's__']
1312	213308$$[u'k__Bacteria', u'p__Chloroflexi', u'c__Thermomicrobia', u'o__JG30-KF-CM45', u'f__', u'g__', u's__']
1313	4453972$$[u'k__Bacteria', u'p__Proteobacteria', u'c__Alphaproteobacteria', u'o__Sphingomonadales', u'f__Sphingomonadaceae', u'g__Kaistobacter', u's__']
1314	1146704$$[u'k__Bacteria', u'p__Planctomycetes', u'c__Planctomycetia', u'o__Gemmatales', u'f__Gemmataceae', u'g__Gemmata', u's__']
1315	4381109$$[u'k__Bacteria', u'p__Proteobacteria', u'c__Betaproteobacteria', u'o__Burkholderiales', u'f__Comamonadaceae', u'g__Rhodoferax', u's__']
1316	113778$$[u'k__Bacteria', u'p__Proteobacteria', u'c__Alphaproteobacteria', u'o__Sphingomonadales', u'f__Sphingomonadaceae']
1317	1038525$$[u'k__Bacteria', u'p__Proteobacteria', u'c__Deltaproteobacteria', u'o__Desulfuromonadales', u'f__Geobacteraceae', u'g__Geobacter', u's__']
1318	4309490$$[u'k__Bacteria', u'p__Acidobacteria', u'c__iii1-8', u'o__DS-18', u'f__', u'g__', u's__']
1319	3100155$$[u'k__Bacteria', u'p__Proteobacteria', u'c__Deltaproteobacteria', u'o__Myxococcales', u'f__Haliangiaceae', u'g__', u's__']
1320	370301$$[u'k__Bacteria', u'p__Proteobacteria', u'c__Alphaproteobacteria', u'o__Rhodospirillales', u'f__Acetobacteraceae', u'g__Roseomonas', u's__']
1321	206038$$[u'k__Bacteria', u'p__Actinobacteria', u'c__Thermoleophilia', u'o__Gaiellales', u'f__', u'g__', u's__']
1322	2733662$$[u'k__Bacteria', u'p__Acidobacteria', u'c__Acidobacteria-6', u'o__CCU21', u'f__', u'g__', u's__']
1323	215692$$[u'k__Bacteria', u'p__Proteobacteria', u'c__Alphaproteobacteria', u'o__Rhizobiales', u'f__Hyphomicrobiaceae', u'g__Rhodoplanes', u's__']
1324	211598$$[u'k__Bacteria', u'p__Bacteroidetes', u'c__[Saprospirae]', u'o__[Saprospirales]', u'f__Chitinophagaceae']
1325	1080447$$[u'k__Bacteria', u'p__Acidobacteria', u'c__Acidobacteria-6', u'o__iii1-15', u'f__', u'g__', u's__']
1326	318184$$[u'k__Bacteria', u'p__Planctomycetes', u'c__Planctomycetia', u'o__Gemmatales', u'f__Gemmataceae', u'g__', u's__']
1327	4428771$$[u'k__Bacteria', u'p__Acidobacteria', u'c__Acidobacteria-6', u'o__iii1-15', u'f__RB40', u'g__', u's__']
1328	273949$$[u'k__Bacteria', u'p__Chloroflexi', u'c__Chloroflexi', u'o__[Roseiflexales]', u'f__', u'g__', u's__']
1329	4299285$$[u'k__Bacteria', u'p__Planctomycetes', u'c__OM190', u'o__agg27', u'f__', u'g__', u's__']
1330	1143359$$[u'k__Bacteria', u'p__Bacteroidetes', u'c__Cytophagia', u'o__Cytophagales', u'f__Cytophagaceae', u'g__Adhaeribacter', u's__']
1331	142606$$[u'k__Bacteria', u'p__Proteobacteria', u'c__Betaproteobacteria', u'o__Rhodocyclales', u'f__Rhodocyclaceae', u'g__Dechloromonas', u's__']
1332	111162$$[u'k__Bacteria', u'p__Planctomycetes', u'c__Phycisphaerae', u'o__WD2101', u'f__', u'g__', u's__']
1333	4410158$$[u'k__Bacteria', u'p__Proteobacteria', u'c__Alphaproteobacteria', u'o__Rhizobiales', u'f__Xanthobacteraceae', u'g__Labrys', u's__']
1334	4444048$$[u'k__Bacteria', u'p__Planctomycetes', u'c__Planctomycetia', u'o__Pirellulales', u'f__Pirellulaceae', u'g__', u's__']
1335	134207$$[u'k__Bacteria', u'p__Firmicutes', u'c__Clostridia', u'o__Clostridiales', u'f__Veillonellaceae', u'g__', u's__']
1336	4462187$$[u'k__Bacteria', u'p__Proteobacteria', u'c__Deltaproteobacteria', u'o__Myxococcales', u'f__', u'g__', u's__']
1337	207036$$[u'k__Bacteria', u'p__Chloroflexi', u'c__Anaerolineae', u'o__H39', u'f__', u'g__', u's__']
1338	605483$$[u'k__Bacteria', u'p__Acidobacteria', u'c__Acidobacteria-6', u'o__iii1-15', u'f__', u'g__', u's__']
1339	89699$$[u'k__Bacteria', u'p__Acidobacteria', u'c__Acidobacteria-6', u'o__iii1-15', u'f__', u'g__', u's__']
1340	4369693$$[u'k__Bacteria', u'p__Proteobacteria', u'c__Alphaproteobacteria', u'o__Rhizobiales', u'f__Hyphomicrobiaceae', u'g__Rhodoplanes', u's__']
1341	12520$$[u'k__Bacteria', u'p__Actinobacteria', u'c__Actinobacteria', u'o__Actinomycetales', u'f__Brevibacteriaceae', u'g__Brevibacterium', u's__aureum']
1342	1719556$$[u'k__Bacteria', u'p__Planctomycetes', u'c__Planctomycetia', u'o__Gemmatales', u'f__Gemmataceae', u'g__Gemmata', u's__']
1343	223286$$[u'k__Bacteria', u'p__Proteobacteria', u'c__Alphaproteobacteria', u'o__Rhodospirillales', u'f__Acetobacteraceae', u'g__', u's__']
1344	536444$$[u'k__Bacteria', u'p__Proteobacteria', u'c__Deltaproteobacteria', u'o__Myxococcales', u'f__Haliangiaceae', u'g__', u's__']
1345	90543$$[u'k__Bacteria', u'p__Proteobacteria', u'c__Betaproteobacteria', u'o__Burkholderiales', u'f__Comamonadaceae']
1346	4308759$$[u'k__Bacteria', u'p__Proteobacteria', u'c__Deltaproteobacteria', u'o__Syntrophobacterales', u'f__Syntrophobacteraceae', u'g__', u's__']
1347	1110227$$[u'k__Bacteria', u'p__Proteobacteria', u'c__Alphaproteobacteria', u'o__Sphingomonadales', u'f__Sphingomonadaceae']
1348	582591$$[u'k__Bacteria', u'p__Actinobacteria', u'c__Actinobacteria', u'o__Actinomycetales', u'f__Streptomycetaceae', u'g__Streptomyces', u's__']
1349	209523$$[u'k__Bacteria', u'p__Acidobacteria', u'c__Solibacteres', u'o__Solibacterales']
1350	2649117$$[u'k__Bacteria', u'p__Planctomycetes', u'c__Phycisphaerae', u'o__WD2101', u'f__', u'g__', u's__']
1351	4303815$$[u'k__Bacteria', u'p__Nitrospirae', u'c__Nitrospira', u'o__Nitrospirales', u'f__Nitrospiraceae', u'g__Nitrospira', u's__']
1352	1148005$$[u'k__Bacteria', u'p__Proteobacteria', u'c__Betaproteobacteria', u'o__Ellin6067', u'f__', u'g__', u's__']
1353	851103$$[u'k__Bacteria', u'p__Proteobacteria', u'c__Deltaproteobacteria', u'o__Desulfuromonadales', u'f__Geobacteraceae', u'g__Geobacter', u's__']
1354	4360284$$[u'k__Bacteria', u'p__Nitrospirae', u'c__Nitrospira', u'o__Nitrospirales', u'f__Nitrospiraceae', u'g__Nitrospira', u's__']
1355	966113$$[u'k__Bacteria', u'p__Actinobacteria', u'c__Acidimicrobiia', u'o__Acidimicrobiales', u'f__', u'g__', u's__']
1356	512552$$[u'k__Bacteria', u'p__Planctomycetes', u'c__Planctomycetia', u'o__Gemmatales', u'f__Gemmataceae', u'g__', u's__']
1357	4391560$$[u'k__Bacteria', u'p__Proteobacteria', u'c__Alphaproteobacteria', u'o__Sphingomonadales', u'f__Erythrobacteraceae']
1358	257075$$[u'k__Bacteria', u'p__Actinobacteria', u'c__Actinobacteria', u'o__Actinomycetales', u'f__Nocardioidaceae', u'g__', u's__']
1359	538113$$[u'k__Bacteria', u'p__Acidobacteria', u'c__Acidobacteria-6', u'o__iii1-15', u'f__', u'g__', u's__']
1360	4417095$$[u'k__Bacteria', u'p__Acidobacteria', u'c__Acidobacteria-6', u'o__iii1-15', u'f__', u'g__', u's__']
1361	1061145$$[u'k__Bacteria', u'p__Proteobacteria', u'c__Alphaproteobacteria', u'o__Rhizobiales', u'f__Beijerinckiaceae', u'g__', u's__']
1362	4093080$$[u'k__Bacteria', u'p__Actinobacteria', u'c__Acidimicrobiia', u'o__Acidimicrobiales', u'f__Iamiaceae', u'g__Iamia', u's__']
1363	240298$$[u'k__Bacteria', u'p__Acidobacteria', u'c__Acidobacteria-6', u'o__iii1-15', u'f__', u'g__', u's__']
1364	1131767$$[u'k__Bacteria', u'p__Verrucomicrobia', u'c__Verrucomicrobiae', u'o__Verrucomicrobiales', u'f__Verrucomicrobiaceae', u'g__Luteolibacter', u's__']
1365	1113229$$[u'k__Bacteria', u'p__Acidobacteria', u'c__Solibacteres', u'o__Solibacterales', u'f__Solibacteraceae', u'g__Candidatus Solibacter', u's__']
1366	4310452$$[u'k__Bacteria', u'p__Actinobacteria', u'c__OPB41', u'o__', u'f__', u'g__', u's__']
1367	55354$$[u'k__Bacteria', u'p__Planctomycetes', u'c__Phycisphaerae', u'o__WD2101', u'f__', u'g__', u's__']
1368	1072673$$[u'k__Bacteria', u'p__Bacteroidetes', u'c__Flavobacteriia', u'o__Flavobacteriales', u'f__Flavobacteriaceae', u'g__Flavobacterium']
1369	805685$$[u'k__Bacteria', u'p__Proteobacteria', u'c__Gammaproteobacteria', u'o__Xanthomonadales', u'f__Xanthomonadaceae']
1370	247301$$[u'k__Bacteria', u'p__Planctomycetes', u'c__Phycisphaerae', u'o__Phycisphaerales', u'f__', u'g__', u's__']
1371	226312$$[u'k__Bacteria', u'p__Proteobacteria', u'c__Alphaproteobacteria', u'o__Rhodospirillales', u'f__Acetobacteraceae', u'g__', u's__']
1372	New.ReferenceOTU919$$[u'k__Bacteria', u'p__Acidobacteria', u'c__Acidobacteria-6', u'o__iii1-15', u'f__', u'g__', u's__']
1373	New.ReferenceOTU1886$$[u'k__Bacteria', u'p__Proteobacteria', u'c__Deltaproteobacteria', u'o__Desulfuromonadales', u'f__Geobacteraceae', u'g__', u's__']
1374	New.ReferenceOTU1269$$[u'k__Bacteria', u'p__Proteobacteria', u'c__Deltaproteobacteria', u'o__Desulfuromonadales', u'f__Geobacteraceae', u'g__Geobacter', u's__']
1375	New.ReferenceOTU1663$$[u'k__Bacteria', u'p__Chloroflexi', u'c__Chloroflexi', u'o__[Roseiflexales]', u'f__[Kouleothrixaceae]', u'g__', u's__']
1376	New.ReferenceOTU1311$$[u'k__Bacteria', u'p__Chloroflexi', u'c__Gitt-GS-136', u'o__', u'f__', u'g__', u's__']
1377	New.ReferenceOTU2500$$[u'k__Bacteria', u'p__Planctomycetes', u'c__Phycisphaerae', u'o__WD2101', u'f__', u'g__', u's__']
1378	New.ReferenceOTU2506$$[u'k__Bacteria', u'p__Proteobacteria', u'c__Gammaproteobacteria', u'o__Alteromonadales', u'f__Alteromonadaceae', u'g__Cellvibrio', u's__']
1379	New.ReferenceOTU104$$[u'k__Bacteria', u'p__Planctomycetes', u'c__Phycisphaerae', u'o__WD2101', u'f__', u'g__', u's__']
1380	New.ReferenceOTU1081$$[u'k__Bacteria', u'p__Acidobacteria', u'c__[Chloracidobacteria]', u'o__RB41', u'f__', u'g__', u's__']
1381	New.ReferenceOTU1083$$[u'k__Bacteria', u'p__Proteobacteria', u'c__Betaproteobacteria', u'o__Rhodocyclales', u'f__Rhodocyclaceae']
1382	New.ReferenceOTU2037$$[u'k__Bacteria', u'p__Acidobacteria', u'c__Acidobacteria-6', u'o__iii1-15', u'f__RB40', u'g__', u's__']
1383	New.ReferenceOTU118$$[u'k__Bacteria', u'p__Proteobacteria', u'c__Deltaproteobacteria', u'o__Myxococcales', u'f__OM27', u'g__', u's__']
1384	New.ReferenceOTU1091$$[u'k__Bacteria', u'p__Actinobacteria', u'c__MB-A2-108', u'o__0319-7L14', u'f__', u'g__', u's__']
1385	New.ReferenceOTU2024$$[u'k__Bacteria', u'p__Verrucomicrobia', u'c__[Spartobacteria]', u'o__[Chthoniobacterales]', u'f__[Chthoniobacteraceae]', u'g__DA101', u's__']
1386	New.ReferenceOTU2029$$[u'k__Bacteria', u'p__Planctomycetes', u'c__Phycisphaerae', u'o__Phycisphaerales', u'f__', u'g__', u's__']
1387	New.ReferenceOTU1936$$[u'k__Bacteria', u'p__Proteobacteria', u'c__Alphaproteobacteria', u'o__Rhodospirillales', u'f__Rhodospirillaceae']
1388	New.ReferenceOTU1930$$[u'k__Bacteria', u'p__Acidobacteria', u'c__Acidobacteria-6', u'o__iii1-15', u'f__', u'g__', u's__']
1389	New.ReferenceOTU1795$$[u'k__Bacteria', u'p__Actinobacteria', u'c__Actinobacteria', u'o__Actinomycetales', u'f__Nocardioidaceae']
1390	New.ReferenceOTU1643$$[u'k__Bacteria', u'p__Proteobacteria', u'c__Alphaproteobacteria', u'o__Rhizobiales', u'f__Bradyrhizobiaceae']
1391	New.ReferenceOTU1426$$[u'k__Bacteria', u'p__Planctomycetes', u'c__Planctomycetia', u'o__Gemmatales', u'f__Gemmataceae', u'g__', u's__']
1392	New.ReferenceOTU1330$$[u'k__Bacteria', u'p__WS3', u'c__PRR-12', u'o__Sediment-1', u'f__', u'g__', u's__']
1393	New.ReferenceOTU437$$[u'k__Bacteria', u'p__Actinobacteria', u'c__Actinobacteria', u'o__Actinomycetales', u'f__Micromonosporaceae', u'g__', u's__']
1394	New.ReferenceOTU1257$$[u'k__Bacteria', u'p__Acidobacteria', u'c__RB25', u'o__', u'f__', u'g__', u's__']
1395	New.ReferenceOTU1251$$[u'k__Bacteria', u'p__Gemmatimonadetes', u'c__Gemmatimonadetes', u'o__N1423WL', u'f__', u'g__', u's__']
1396	New.ReferenceOTU1433$$[u'k__Bacteria', u'p__WS3', u'c__PRR-12', u'o__LD1-PA13', u'f__', u'g__', u's__']
1397	New.ReferenceOTU1439$$[u'k__Bacteria', u'p__Proteobacteria', u'c__Deltaproteobacteria', u'o__Myxococcales', u'f__', u'g__', u's__']
1398	New.ReferenceOTU2538$$[u'k__Bacteria', u'p__Planctomycetes', u'c__Planctomycetia', u'o__Gemmatales', u'f__Gemmataceae', u'g__', u's__']
1399	New.ReferenceOTU2225$$[u'k__Bacteria', u'p__Actinobacteria', u'c__Acidimicrobiia', u'o__Acidimicrobiales', u'f__EB1017', u'g__', u's__']
1400	New.ReferenceOTU2227$$[u'k__Bacteria', u'p__Gemmatimonadetes', u'c__Gemm-1', u'o__', u'f__', u'g__', u's__']
1401	New.ReferenceOTU2229$$[u'k__Bacteria', u'p__Proteobacteria', u'c__Gammaproteobacteria']
1402	New.ReferenceOTU2310$$[u'k__Bacteria', u'p__Acidobacteria', u'c__Acidobacteria-6', u'o__iii1-15', u'f__', u'g__', u's__']
1403	New.ReferenceOTU956$$[u'k__Bacteria', u'p__Proteobacteria', u'c__Betaproteobacteria', u'o__Burkholderiales', u'f__Alcaligenaceae']
1404	New.ReferenceOTU1224$$[u'k__Bacteria', u'p__Planctomycetes', u'c__Phycisphaerae', u'o__WD2101', u'f__', u'g__', u's__']
1405	New.ReferenceOTU708$$[u'k__Bacteria', u'p__Chloroflexi', u'c__Ellin6529', u'o__', u'f__', u'g__', u's__']
1406	New.ReferenceOTU703$$[u'k__Bacteria', u'p__Planctomycetes', u'c__Planctomycetia', u'o__Gemmatales', u'f__Gemmataceae', u'g__', u's__']
1407	New.ReferenceOTU899$$[u'k__Bacteria', u'p__Proteobacteria', u'c__Alphaproteobacteria', u'o__Caulobacterales', u'f__Caulobacteraceae', u'g__Mycoplana', u's__']
1408	New.ReferenceOTU897$$[u'k__Bacteria', u'p__Planctomycetes', u'c__OM190', u'o__agg27', u'f__', u'g__', u's__']
1409	New.ReferenceOTU566$$[u'k__Bacteria', u'p__Acidobacteria', u'c__Acidobacteria-6']
1410	New.ReferenceOTU2675$$[u'k__Bacteria', u'p__Bacteroidetes', u'c__Flavobacteriia', u'o__Flavobacteriales', u'f__Flavobacteriaceae', u'g__Flavobacterium', u's__']
1411	New.ReferenceOTU1289$$[u'k__Bacteria', u'p__Proteobacteria', u'c__Gammaproteobacteria', u'o__Xanthomonadales']
1412	New.ReferenceOTU397$$[u'k__Bacteria', u'p__Actinobacteria', u'c__Actinobacteria', u'o__Actinomycetales', u'f__Micromonosporaceae']
1413	New.ReferenceOTU2483$$[u'k__Bacteria', u'p__Acidobacteria', u'c__iii1-8', u'o__32-20', u'f__', u'g__', u's__']
1414	New.ReferenceOTU2482$$[u'k__Bacteria', u'p__Planctomycetes', u'c__Planctomycetia', u'o__Pirellulales', u'f__Pirellulaceae', u'g__A17', u's__']
1415	New.ReferenceOTU974$$[u'k__Bacteria', u'p__Planctomycetes', u'c__Planctomycetia', u'o__Pirellulales', u'f__Pirellulaceae', u'g__', u's__']
1416	New.ReferenceOTU2112$$[u'k__Bacteria', u'p__Proteobacteria', u'c__Gammaproteobacteria', u'o__Xanthomonadales', u'f__Xanthomonadaceae', u'g__Thermomonas', u's__']
1417	New.ReferenceOTU1112$$[u'k__Bacteria', u'p__Proteobacteria', u'c__Betaproteobacteria', u'o__Burkholderiales', u'f__Comamonadaceae']
1418	New.ReferenceOTU1594$$[u'k__Bacteria', u'p__Actinobacteria', u'c__Thermoleophilia', u'o__Solirubrobacterales', u'f__', u'g__', u's__']
1419	New.ReferenceOTU1377$$[u'k__Bacteria', u'p__Verrucomicrobia', u'c__[Spartobacteria]', u'o__[Chthoniobacterales]', u'f__[Chthoniobacteraceae]', u'g__DA101', u's__']
1420	New.ReferenceOTU1378$$[u'k__Bacteria', u'p__Proteobacteria', u'c__Alphaproteobacteria', u'o__Rhizobiales', u'f__Hyphomicrobiaceae', u'g__Hyphomicrobium']
1421	New.ReferenceOTU505$$[u'k__Bacteria', u'p__Planctomycetes', u'c__Phycisphaerae', u'o__WD2101', u'f__', u'g__', u's__']
1422	New.ReferenceOTU210$$[u'k__Bacteria', u'p__Acidobacteria', u'c__Solibacteres', u'o__Solibacterales', u'f__', u'g__', u's__']
1423	New.ReferenceOTU2585$$[u'k__Bacteria', u'p__Proteobacteria', u'c__Deltaproteobacteria', u'o__Myxococcales', u'f__Haliangiaceae', u'g__', u's__']
1424	New.ReferenceOTU2292$$[u'k__Bacteria', u'p__Chloroflexi', u'c__C0119', u'o__', u'f__', u'g__', u's__']
1425	New.ReferenceOTU1810$$[u'k__Bacteria', u'p__Gemmatimonadetes', u'c__Gemmatimonadetes', u'o__Gemmatimonadales', u'f__Gemmatimonadaceae', u'g__Gemmatimonas', u's__']
1426	New.ReferenceOTU778$$[u'k__Bacteria', u'p__Proteobacteria', u'c__Alphaproteobacteria', u'o__Rhizobiales']
1427	New.ReferenceOTU1589$$[u'k__Bacteria', u'p__Actinobacteria', u'c__MB-A2-108', u'o__0319-7L14', u'f__', u'g__', u's__']
1428	New.ReferenceOTU2466$$[u'k__Bacteria', u'p__Planctomycetes', u'c__Phycisphaerae', u'o__WD2101', u'f__', u'g__', u's__']
1429	New.ReferenceOTU194$$[u'k__Bacteria', u'p__OD1', u'c__ZB2', u'o__', u'f__', u'g__', u's__']
1430	New.ReferenceOTU516$$[u'k__Bacteria', u'p__Actinobacteria', u'c__Thermoleophilia', u'o__Gaiellales', u'f__Gaiellaceae', u'g__', u's__']
1431	New.ReferenceOTU200$$[u'k__Bacteria', u'p__Chloroflexi', u'c__Ellin6529', u'o__', u'f__', u'g__', u's__']
1432	New.ReferenceOTU206$$[u'k__Bacteria', u'p__Actinobacteria', u'c__Actinobacteria', u'o__Actinomycetales', u'f__Microbacteriaceae']
1433	New.ReferenceOTU39$$[u'k__Bacteria', u'p__Planctomycetes', u'c__Phycisphaerae', u'o__WD2101', u'f__', u'g__', u's__']
1434	New.ReferenceOTU1553$$[u'k__Bacteria', u'p__Chloroflexi', u'c__S085', u'o__', u'f__', u'g__', u's__']
1435	New.ReferenceOTU527$$[u'k__Bacteria', u'p__Acidobacteria', u'c__Acidobacteria-6', u'o__iii1-15', u'f__', u'g__', u's__']
1436	New.ReferenceOTU2149$$[u'k__Bacteria', u'p__Gemmatimonadetes', u'c__Gemmatimonadetes', u'o__Gemmatimonadales', u'f__Ellin5301', u'g__', u's__']
1437	New.ReferenceOTU1940$$[u'k__Bacteria', u'p__Acidobacteria', u'c__Acidobacteria-6', u'o__iii1-15', u'f__', u'g__', u's__']
1438	New.ReferenceOTU1944$$[u'k__Bacteria', u'p__Actinobacteria', u'c__Actinobacteria', u'o__Actinomycetales', u'f__Mycobacteriaceae', u'g__Mycobacterium', u's__']
1439	New.ReferenceOTU1836$$[u'k__Bacteria', u'p__Acidobacteria', u'c__iii1-8', u'o__DS-18', u'f__', u'g__', u's__']
1440	New.ReferenceOTU539$$[u'k__Bacteria', u'p__Planctomycetes', u'c__Phycisphaerae', u'o__WD2101', u'f__', u'g__', u's__']
1441	New.ReferenceOTU2621$$[u'k__Bacteria', u'p__Actinobacteria', u'c__Thermoleophilia', u'o__Gaiellales', u'f__Gaiellaceae', u'g__', u's__']
1442	New.ReferenceOTU220$$[u'k__Bacteria', u'p__Proteobacteria', u'c__Deltaproteobacteria', u'o__Myxococcales', u'f__', u'g__', u's__']
1443	New.ReferenceOTU2154$$[u'k__Bacteria', u'p__Proteobacteria', u'c__Betaproteobacteria', u'o__A21b', u'f__EB1003', u'g__', u's__']
1444	New.ReferenceOTU1844$$[u'k__Bacteria', u'p__Gemmatimonadetes', u'c__Gemm-1', u'o__', u'f__', u'g__', u's__']
1445	New.ReferenceOTU1448$$[u'k__Bacteria', u'p__Chloroflexi', u'c__Chloroflexi', u'o__[Roseiflexales]', u'f__[Kouleothrixaceae]', u'g__', u's__']
1446	New.ReferenceOTU2439$$[u'k__Bacteria', u'p__Chloroflexi', u'c__Gitt-GS-136', u'o__', u'f__', u'g__', u's__']
1447	New.ReferenceOTU783$$[u'k__Bacteria', u'p__Proteobacteria', u'c__Alphaproteobacteria', u'o__Rhodospirillales', u'f__Rhodospirillaceae', u'g__', u's__']
1448	New.ReferenceOTU782$$[u'k__Bacteria', u'p__Proteobacteria', u'c__Alphaproteobacteria', u'o__Rhizobiales', u'f__Bradyrhizobiaceae', u'g__Balneimonas', u's__']
1449	New.ReferenceOTU2364$$[u'k__Bacteria', u'p__Acidobacteria', u'c__Acidobacteria-6', u'o__iii1-15', u'f__', u'g__', u's__']
1450	New.ReferenceOTU2363$$[u'k__Bacteria', u'p__Actinobacteria', u'c__Actinobacteria', u'o__Actinomycetales', u'f__Streptosporangiaceae', u'g__Streptosporangium', u's__']
1451	New.ReferenceOTU1297$$[u'k__Bacteria', u'p__Planctomycetes', u'c__Phycisphaerae', u'o__WD2101', u'f__', u'g__', u's__']
1452	New.ReferenceOTU1145$$[u'k__Bacteria', u'p__Acidobacteria', u'c__Solibacteres', u'o__Solibacterales', u'f__Solibacteraceae', u'g__Candidatus Solibacter', u's__']
1453	New.ReferenceOTU792$$[u'k__Bacteria', u'p__Verrucomicrobia', u'c__[Pedosphaerae]', u'o__[Pedosphaerales]', u'f__', u'g__', u's__']
1454	New.ReferenceOTU794$$[u'k__Bacteria', u'p__Proteobacteria', u'c__Deltaproteobacteria', u'o__Myxococcales', u'f__', u'g__', u's__']
1455	New.ReferenceOTU2390$$[u'k__Bacteria', u'p__Proteobacteria', u'c__Betaproteobacteria', u'o__Ellin6067', u'f__', u'g__', u's__']
1456	New.ReferenceOTU2089$$[u'k__Bacteria', u'p__Actinobacteria', u'c__Acidimicrobiia', u'o__Acidimicrobiales', u'f__C111', u'g__', u's__']
1457	New.ReferenceOTU2177$$[u'k__Bacteria', u'p__Gemmatimonadetes', u'c__Gemm-1', u'o__', u'f__', u'g__', u's__']
1458	New.ReferenceOTU1282$$[u'k__Bacteria', u'p__Proteobacteria', u'c__Alphaproteobacteria', u'o__Rhizobiales', u'f__Rhodobiaceae', u'g__Afifella', u's__']
1459	New.ReferenceOTU1288$$[u'k__Bacteria', u'p__Proteobacteria', u'c__Alphaproteobacteria', u'o__Sphingomonadales', u'f__Sphingomonadaceae', u'g__Kaistobacter', u's__']
1460	New.ReferenceOTU1041$$[u'k__Bacteria', u'p__Gemmatimonadetes', u'c__Gemm-3', u'o__', u'f__', u'g__', u's__']
1461	New.ReferenceOTU1191$$[u'k__Bacteria', u'p__Chloroflexi', u'c__C0119', u'o__', u'f__', u'g__', u's__']
1462	New.ReferenceOTU2097$$[u'k__Bacteria', u'p__Actinobacteria', u'c__Acidimicrobiia', u'o__Acidimicrobiales']
1463	New.ReferenceOTU873$$[u'k__Bacteria', u'p__Proteobacteria', u'c__Betaproteobacteria']
1464	New.ReferenceOTU2742$$[u'k__Bacteria', u'p__Actinobacteria', u'c__Thermoleophilia', u'o__Gaiellales', u'f__Gaiellaceae', u'g__', u's__']
1465	New.ReferenceOTU67$$[u'k__Bacteria', u'p__Actinobacteria', u'c__Actinobacteria', u'o__Actinomycetales', u'f__Mycobacteriaceae', u'g__Mycobacterium', u's__']
1466	New.ReferenceOTU1242$$[u'k__Bacteria', u'p__Proteobacteria', u'c__Alphaproteobacteria', u'o__Rhodospirillales', u'f__Rhodospirillaceae', u'g__', u's__']
1467	New.ReferenceOTU1729$$[u'k__Bacteria', u'p__Planctomycetes', u'c__Phycisphaerae', u'o__Phycisphaerales', u'f__', u'g__', u's__']
1468	New.ReferenceOTU484$$[u'k__Bacteria', u'p__Acidobacteria', u'c__Solibacteres', u'o__Solibacterales', u'f__', u'g__', u's__']
1469	New.ReferenceOTU1503$$[u'k__Bacteria', u'p__Acidobacteria', u'c__iii1-8', u'o__DS-18', u'f__', u'g__', u's__']
1470	New.ReferenceOTU1507$$[u'k__Bacteria', u'p__Proteobacteria', u'c__Alphaproteobacteria', u'o__Rhizobiales', u'f__Hyphomicrobiaceae', u'g__Devosia', u's__']
1471	New.ReferenceOTU1189$$[u'k__Bacteria', u'p__Actinobacteria', u'c__MB-A2-108', u'o__0319-7L14', u'f__', u'g__', u's__']
1472	New.ReferenceOTU2575$$[u'k__Bacteria', u'p__Planctomycetes', u'c__OM190', u'o__CL500-15', u'f__', u'g__', u's__']
1473	New.CleanUp.ReferenceOTU284$$[u'k__Bacteria', u'p__Chloroflexi', u'c__Gitt-GS-136', u'o__', u'f__', u'g__', u's__']
1474	New.CleanUp.ReferenceOTU9373$$[u'k__Bacteria', u'p__Bacteroidetes', u'c__Sphingobacteriia', u'o__Sphingobacteriales', u'f__Sphingobacteriaceae', u'g__Solitalea', u's__koreensis']
1475	New.CleanUp.ReferenceOTU9570$$[u'k__Bacteria', u'p__Actinobacteria', u'c__Acidimicrobiia', u'o__Acidimicrobiales', u'f__EB1017', u'g__', u's__']
1476	New.CleanUp.ReferenceOTU12439$$[u'k__Bacteria', u'p__Proteobacteria', u'c__Alphaproteobacteria', u'o__Sphingomonadales', u'f__Sphingomonadaceae']
1477	New.CleanUp.ReferenceOTU13178$$[u'k__Bacteria', u'p__Gemmatimonadetes', u'c__Gemmatimonadetes']
1478	New.CleanUp.ReferenceOTU13836$$[u'k__Bacteria', u'p__Acidobacteria', u'c__iii1-8', u'o__DS-18', u'f__', u'g__', u's__']
1479	New.CleanUp.ReferenceOTU15166$$[u'k__Bacteria', u'p__Bacteroidetes', u'c__[Saprospirae]', u'o__[Saprospirales]', u'f__Chitinophagaceae', u'g__Flavisolibacter', u's__']
1480	New.CleanUp.ReferenceOTU23086$$[u'k__Bacteria', u'p__Verrucomicrobia', u'c__[Spartobacteria]', u'o__[Chthoniobacterales]', u'f__[Chthoniobacteraceae]', u'g__DA101', u's__']
1481	New.CleanUp.ReferenceOTU24304$$[u'k__Bacteria', u'p__Gemmatimonadetes', u'c__Gemmatimonadetes', u'o__KD8-87', u'f__', u'g__', u's__']
1482	New.CleanUp.ReferenceOTU25689$$[u'k__Bacteria', u'p__Planctomycetes', u'c__Planctomycetia', u'o__Gemmatales', u'f__Gemmataceae', u'g__Gemmata', u's__']
1483	New.CleanUp.ReferenceOTU41120$$[u'k__Bacteria', u'p__Chloroflexi', u'c__Anaerolineae', u'o__SBR1031', u'f__A4b', u'g__', u's__']
1484	New.CleanUp.ReferenceOTU45891$$[u'k__Bacteria', u'p__Proteobacteria', u'c__Alphaproteobacteria', u'o__Rhizobiales', u'f__Hyphomicrobiaceae', u'g__Rhodoplanes', u's__']
1485	New.CleanUp.ReferenceOTU46310$$[u'k__Bacteria', u'p__Proteobacteria', u'c__Deltaproteobacteria', u'o__Myxococcales', u'f__OM27', u'g__', u's__']
1486	New.CleanUp.ReferenceOTU48534$$[u'k__Bacteria', u'p__Chloroflexi', u'c__Chloroflexi', u'o__Herpetosiphonales', u'f__', u'g__', u's__']
1487	New.CleanUp.ReferenceOTU49721$$[u'k__Bacteria', u'p__Planctomycetes', u'c__Phycisphaerae', u'o__Pla1', u'f__', u'g__', u's__']
1488	New.CleanUp.ReferenceOTU49841$$[u'k__Bacteria', u'p__Proteobacteria', u'c__Betaproteobacteria', u'o__SBla14', u'f__', u'g__', u's__']
1489	New.CleanUp.ReferenceOTU53570$$[u'k__Bacteria', u'p__Actinobacteria', u'c__Actinobacteria', u'o__Actinomycetales', u'f__Intrasporangiaceae']
1490	New.CleanUp.ReferenceOTU53615$$[u'k__Bacteria', u'p__Proteobacteria', u'c__Alphaproteobacteria', u'o__', u'f__', u'g__', u's__']
1491	New.CleanUp.ReferenceOTU57951$$[u'k__Bacteria', u'p__Planctomycetes', u'c__Phycisphaerae', u'o__WD2101', u'f__', u'g__', u's__']
1492	New.CleanUp.ReferenceOTU59489$$[u'k__Bacteria', u'p__Bacteroidetes', u'c__Flavobacteriia', u'o__Flavobacteriales', u'f__Cryomorphaceae', u'g__Crocinitomix', u's__']
1493	New.CleanUp.ReferenceOTU62206$$[u'k__Bacteria', u'p__Proteobacteria', u'c__Alphaproteobacteria', u'o__Rhizobiales']
1494	New.CleanUp.ReferenceOTU62744$$[u'k__Bacteria', u'p__Planctomycetes', u'c__Phycisphaerae', u'o__WD2101', u'f__', u'g__', u's__']
1495	New.CleanUp.ReferenceOTU64498$$[u'k__Bacteria', u'p__Actinobacteria', u'c__Actinobacteria', u'o__Actinomycetales', u'f__Micromonosporaceae', u'g__Pilimelia', u's__']
1496	New.CleanUp.ReferenceOTU69961$$[u'k__Bacteria', u'p__Bacteroidetes', u'c__Bacteroidia', u'o__Bacteroidales', u'f__', u'g__', u's__']
1497	New.CleanUp.ReferenceOTU71660$$[u'k__Bacteria', u'p__Planctomycetes', u'c__Phycisphaerae', u'o__Phycisphaerales', u'f__', u'g__', u's__']
1498	New.CleanUp.ReferenceOTU71764$$[u'k__Bacteria', u'p__Proteobacteria', u'c__Deltaproteobacteria', u'o__Myxococcales', u'f__Nannocystaceae', u'g__Nannocystis', u's__']
1499	New.CleanUp.ReferenceOTU74428$$[u'k__Bacteria', u'p__Proteobacteria', u'c__Deltaproteobacteria', u'o__Desulfobacterales', u'f__Desulfobulbaceae', u'g__', u's__']
1500	New.CleanUp.ReferenceOTU77965$$[u'k__Bacteria', u'p__Acidobacteria', u'c__iii1-8', u'o__DS-18', u'f__', u'g__', u's__']
1501	New.CleanUp.ReferenceOTU79447$$[u'k__Bacteria', u'p__Planctomycetes', u'c__Planctomycetia', u'o__Planctomycetales', u'f__Planctomycetaceae', u'g__Planctomyces', u's__']
1502	New.CleanUp.ReferenceOTU80235$$[u'k__Bacteria', u'p__Gemmatimonadetes', u'c__Gemmatimonadetes', u'o__Gemmatimonadales', u'f__Gemmatimonadaceae', u'g__Gemmatimonas', u's__']
1503	New.CleanUp.ReferenceOTU80614$$[u'k__Bacteria', u'p__Verrucomicrobia', u'c__[Spartobacteria]', u'o__[Chthoniobacterales]', u'f__[Chthoniobacteraceae]', u'g__DA101', u's__']
1504	New.CleanUp.ReferenceOTU81519$$[u'k__Bacteria', u'p__Planctomycetes', u'c__Phycisphaerae', u'o__WD2101', u'f__', u'g__', u's__']
1505	New.CleanUp.ReferenceOTU83442$$[u'k__Bacteria', u'p__Gemmatimonadetes', u'c__Gemmatimonadetes', u'o__N1423WL', u'f__', u'g__', u's__']
1506	New.CleanUp.ReferenceOTU84894$$[u'k__Bacteria', u'p__Proteobacteria', u'c__Betaproteobacteria', u'o__Burkholderiales', u'f__Comamonadaceae']
1507	New.CleanUp.ReferenceOTU86498$$[u'k__Bacteria', u'p__Acidobacteria', u'c__Acidobacteria-6', u'o__CCU21', u'f__', u'g__', u's__']
1508	New.CleanUp.ReferenceOTU87921$$[u'k__Bacteria', u'p__Planctomycetes', u'c__Phycisphaerae', u'o__WD2101', u'f__', u'g__', u's__']
1509	New.CleanUp.ReferenceOTU101392$$[u'k__Bacteria', u'p__Planctomycetes', u'c__Planctomycetia', u'o__Pirellulales', u'f__Pirellulaceae']
1510	New.CleanUp.ReferenceOTU101974$$[u'k__Bacteria', u'p__Proteobacteria', u'c__Alphaproteobacteria', u'o__Rhodospirillales', u'f__Rhodospirillaceae', u'g__Magnetospirillum', u's__']
1511	New.CleanUp.ReferenceOTU109199$$[u'k__Bacteria', u'p__Proteobacteria', u'c__Alphaproteobacteria', u'o__Rhizobiales']
1512	New.CleanUp.ReferenceOTU109310$$[u'k__Bacteria', u'p__Planctomycetes', u'c__OM190', u'o__agg27', u'f__', u'g__', u's__']
1513	New.CleanUp.ReferenceOTU112641$$[u'k__Bacteria', u'p__Proteobacteria', u'c__Betaproteobacteria', u'o__Burkholderiales', u'f__Comamonadaceae']
1514	New.CleanUp.ReferenceOTU113774$$[u'k__Bacteria', u'p__Armatimonadetes', u'c__[Fimbriimonadia]', u'o__[Fimbriimonadales]', u'f__[Fimbriimonadaceae]']
1515	New.CleanUp.ReferenceOTU116446$$[u'k__Bacteria', u'p__Bacteroidetes', u'c__Cytophagia', u'o__Cytophagales', u'f__Cytophagaceae', u'g__', u's__']
1516	New.CleanUp.ReferenceOTU117108$$[u'k__Bacteria', u'p__Proteobacteria', u'c__Deltaproteobacteria', u'o__Myxococcales']
1517	New.CleanUp.ReferenceOTU119269$$[u'k__Bacteria', u'p__OD1', u'c__ZB2', u'o__', u'f__', u'g__', u's__']
1518	New.CleanUp.ReferenceOTU120172$$[u'k__Bacteria', u'p__Planctomycetes', u'c__Phycisphaerae', u'o__WD2101', u'f__', u'g__', u's__']
1519	New.CleanUp.ReferenceOTU120739$$[u'k__Bacteria', u'p__Proteobacteria', u'c__Betaproteobacteria', u'o__MND1', u'f__', u'g__', u's__']
1520	New.CleanUp.ReferenceOTU126300$$[u'k__Bacteria', u'p__Proteobacteria', u'c__Deltaproteobacteria', u'o__Myxococcales', u'f__', u'g__', u's__']
1521	New.CleanUp.ReferenceOTU126616$$[u'k__Bacteria', u'p__Acidobacteria', u'c__iii1-8', u'o__', u'f__', u'g__', u's__']
1522	New.CleanUp.ReferenceOTU130580$$[u'k__Bacteria', u'p__Bacteroidetes', u'c__Flavobacteriia', u'o__Flavobacteriales', u'f__Cryomorphaceae', u'g__Fluviicola', u's__']
1523	New.CleanUp.ReferenceOTU131425$$[u'k__Bacteria', u'p__Acidobacteria', u'c__Acidobacteria-6', u'o__CCU21', u'f__', u'g__', u's__']
1524	New.CleanUp.ReferenceOTU132741$$[u'k__Bacteria', u'p__Acidobacteria', u'c__Solibacteres', u'o__Solibacterales', u'f__', u'g__', u's__']
1525	New.CleanUp.ReferenceOTU135896$$[u'k__Bacteria', u'p__Proteobacteria', u'c__Deltaproteobacteria', u'o__Myxococcales', u'f__Haliangiaceae', u'g__', u's__']
1526	New.CleanUp.ReferenceOTU138839$$[u'k__Bacteria', u'p__Planctomycetes', u'c__Planctomycetia', u'o__Gemmatales', u'f__Isosphaeraceae']
1527	New.CleanUp.ReferenceOTU142055$$[u'k__Bacteria', u'p__Planctomycetes', u'c__C6', u'o__MVS-107', u'f__', u'g__', u's__']
1528	New.CleanUp.ReferenceOTU150919$$[u'k__Bacteria', u'p__Chloroflexi', u'c__Ellin6529', u'o__', u'f__', u'g__', u's__']
1529	New.CleanUp.ReferenceOTU153354$$[u'k__Bacteria', u'p__Actinobacteria', u'c__Acidimicrobiia', u'o__Acidimicrobiales', u'f__', u'g__', u's__']
1530	New.CleanUp.ReferenceOTU157391$$[u'k__Bacteria', u'p__Proteobacteria', u'c__Alphaproteobacteria', u'o__Sphingomonadales', u'f__Sphingomonadaceae']
1531	New.CleanUp.ReferenceOTU158101$$[u'k__Bacteria', u'p__Chloroflexi', u'c__Thermomicrobia', u'o__JG30-KF-CM45', u'f__', u'g__', u's__']
1532	New.CleanUp.ReferenceOTU161648$$[u'k__Bacteria', u'p__Acidobacteria', u'c__Acidobacteriia', u'o__Acidobacteriales', u'f__Acidobacteriaceae']
1533	New.CleanUp.ReferenceOTU162750$$[u'k__Bacteria', u'p__Actinobacteria', u'c__Acidimicrobiia', u'o__Acidimicrobiales', u'f__C111', u'g__', u's__']
1534	New.CleanUp.ReferenceOTU163423$$[u'k__Bacteria', u'p__Proteobacteria', u'c__Alphaproteobacteria', u'o__Sphingomonadales', u'f__Sphingomonadaceae', u'g__Sphingomonas']
1535	New.CleanUp.ReferenceOTU164140$$[u'k__Bacteria', u'p__Actinobacteria', u'c__MB-A2-108', u'o__0319-7L14', u'f__', u'g__', u's__']
1536	New.CleanUp.ReferenceOTU164476$$[u'k__Bacteria', u'p__Actinobacteria', u'c__Thermoleophilia', u'o__Gaiellales', u'f__Gaiellaceae', u'g__', u's__']
1537	New.CleanUp.ReferenceOTU165724$$[u'k__Bacteria', u'p__Proteobacteria', u'c__Alphaproteobacteria', u'o__Rhizobiales']
1538	New.CleanUp.ReferenceOTU167303$$[u'k__Bacteria', u'p__Chloroflexi', u'c__Ellin6529', u'o__', u'f__', u'g__', u's__']
1539	New.CleanUp.ReferenceOTU180971$$[u'k__Bacteria', u'p__Verrucomicrobia', u'c__[Spartobacteria]', u'o__[Chthoniobacterales]', u'f__[Chthoniobacteraceae]', u'g__DA101', u's__']
1540	New.CleanUp.ReferenceOTU181202$$[u'k__Bacteria', u'p__Planctomycetes', u'c__Phycisphaerae', u'o__WD2101', u'f__', u'g__', u's__']
1541	New.CleanUp.ReferenceOTU182305$$[u'k__Bacteria', u'p__Chloroflexi', u'c__Ellin6529', u'o__', u'f__', u'g__', u's__']
1542	New.CleanUp.ReferenceOTU182564$$[u'k__Bacteria', u'p__Chloroflexi', u'c__Chloroflexi', u'o__[Roseiflexales]', u'f__[Kouleothrixaceae]', u'g__', u's__']
1543	New.CleanUp.ReferenceOTU183754$$[u'k__Bacteria', u'p__Chloroflexi', u'c__Chloroflexi', u'o__[Roseiflexales]', u'f__[Kouleothrixaceae]', u'g__', u's__']
1544	New.CleanUp.ReferenceOTU187799$$[u'k__Bacteria', u'p__Proteobacteria', u'c__Deltaproteobacteria', u'o__Myxococcales', u'f__OM27', u'g__', u's__']
1545	New.CleanUp.ReferenceOTU188414$$[u'k__Bacteria', u'p__Chloroflexi', u'c__S085', u'o__', u'f__', u'g__', u's__']
1546	New.CleanUp.ReferenceOTU194051$$[u'k__Bacteria', u'p__WS3', u'c__PRR-12', u'o__Sediment-1', u'f__PRR-10', u'g__', u's__']
1547	New.CleanUp.ReferenceOTU195603$$[u'k__Bacteria', u'p__Verrucomicrobia', u'c__[Spartobacteria]', u'o__[Chthoniobacterales]', u'f__[Chthoniobacteraceae]', u'g__DA101', u's__']
1548	New.CleanUp.ReferenceOTU197319$$[u'k__Bacteria', u'p__Actinobacteria', u'c__Thermoleophilia', u'o__Gaiellales', u'f__Gaiellaceae', u'g__', u's__']
1549	New.CleanUp.ReferenceOTU197739$$[u'k__Bacteria', u'p__Verrucomicrobia', u'c__[Spartobacteria]', u'o__[Chthoniobacterales]', u'f__[Chthoniobacteraceae]', u'g__DA101', u's__']
1550	New.CleanUp.ReferenceOTU200869$$[u'k__Bacteria', u'p__Proteobacteria', u'c__Betaproteobacteria', u'o__Burkholderiales', u'f__Oxalobacteraceae', u'g__Janthinobacterium', u's__']
1551	New.CleanUp.ReferenceOTU202822$$[u'k__Bacteria', u'p__Chloroflexi', u'c__Anaerolineae', u'o__Anaerolineales', u'f__Anaerolinaceae', u'g__Anaerolinea', u's__']
1552	New.CleanUp.ReferenceOTU203527$$[u'k__Bacteria', u'p__Proteobacteria', u'c__Betaproteobacteria']
1553	New.CleanUp.ReferenceOTU216734$$[u'k__Bacteria', u'p__Acidobacteria', u'c__Solibacteres', u'o__Solibacterales', u'f__', u'g__', u's__']
1554	New.CleanUp.ReferenceOTU218779$$[u'k__Bacteria', u'p__Acidobacteria', u'c__Acidobacteria-6', u'o__iii1-15', u'f__', u'g__', u's__']
1555	New.CleanUp.ReferenceOTU219421$$[u'k__Bacteria', u'p__Acidobacteria', u'c__Sva0725', u'o__Sva0725', u'f__', u'g__', u's__']
1556	New.CleanUp.ReferenceOTU223725$$[u'k__Bacteria', u'p__Acidobacteria', u'c__Solibacteres', u'o__Solibacterales', u'f__Solibacteraceae', u'g__Candidatus Solibacter', u's__']
1557	New.CleanUp.ReferenceOTU225484$$[u'k__Bacteria', u'p__Proteobacteria', u'c__Deltaproteobacteria', u'o__Myxococcales', u'f__Nannocystaceae', u'g__Nannocystis', u's__']
1558	New.CleanUp.ReferenceOTU226559$$[u'k__Bacteria', u'p__Gemmatimonadetes', u'c__Gemm-1', u'o__', u'f__', u'g__', u's__']
1559	New.CleanUp.ReferenceOTU227341$$[u'k__Bacteria', u'p__Proteobacteria', u'c__Betaproteobacteria', u'o__SBla14', u'f__', u'g__', u's__']
1560	New.CleanUp.ReferenceOTU230485$$[u'k__Bacteria', u'p__Proteobacteria', u'c__Alphaproteobacteria', u'o__Rhizobiales']
1561	New.CleanUp.ReferenceOTU231908$$[u'k__Bacteria', u'p__Planctomycetes', u'c__Phycisphaerae', u'o__WD2101', u'f__', u'g__', u's__']
1562	New.CleanUp.ReferenceOTU244706$$[u'k__Bacteria', u'p__Actinobacteria', u'c__Actinobacteria', u'o__Actinomycetales', u'f__Micromonosporaceae', u'g__Catellatospora', u's__']
1563	New.CleanUp.ReferenceOTU250305$$[u'k__Bacteria', u'p__Acidobacteria', u'c__Acidobacteria-6', u'o__iii1-15', u'f__', u'g__', u's__']
1564	New.CleanUp.ReferenceOTU251731$$[u'k__Bacteria', u'p__Planctomycetes', u'c__Planctomycetia', u'o__Gemmatales', u'f__Gemmataceae', u'g__Gemmata', u's__']
1565	New.CleanUp.ReferenceOTU254088$$[u'k__Bacteria', u'p__Acidobacteria', u'c__Acidobacteria-6', u'o__iii1-15', u'f__', u'g__', u's__']
1566	New.CleanUp.ReferenceOTU258392$$[u'k__Bacteria', u'p__Proteobacteria', u'c__Gammaproteobacteria', u'o__Xanthomonadales', u'f__Sinobacteraceae', u'g__', u's__']
1567	New.CleanUp.ReferenceOTU260709$$[u'k__Bacteria', u'p__Gemmatimonadetes', u'c__Gemmatimonadetes', u'o__Ellin5290', u'f__', u'g__', u's__']
1568	New.CleanUp.ReferenceOTU261751$$[u'k__Bacteria', u'p__Proteobacteria', u'c__Alphaproteobacteria', u'o__Rhizobiales']
1569	New.CleanUp.ReferenceOTU261850$$[u'k__Bacteria', u'p__Proteobacteria', u'c__Deltaproteobacteria', u'o__Myxococcales', u'f__OM27', u'g__', u's__']
1570	New.CleanUp.ReferenceOTU264863$$[u'k__Bacteria', u'p__Acidobacteria', u'c__[Chloracidobacteria]', u'o__RB41', u'f__Ellin6075', u'g__', u's__']
1571	New.CleanUp.ReferenceOTU272765$$[u'k__Bacteria', u'p__Acidobacteria', u'c__Acidobacteria-6', u'o__iii1-15', u'f__', u'g__', u's__']
1572	New.CleanUp.ReferenceOTU273124$$[u'k__Bacteria', u'p__Proteobacteria', u'c__Deltaproteobacteria']
1573	New.CleanUp.ReferenceOTU277753$$[u'k__Bacteria', u'p__Proteobacteria', u'c__Betaproteobacteria', u'o__MND1', u'f__', u'g__', u's__']
1574	New.CleanUp.ReferenceOTU282991$$[u'k__Bacteria', u'p__Planctomycetes', u'c__Planctomycetia', u'o__Gemmatales', u'f__Gemmataceae', u'g__', u's__']
1575	New.CleanUp.ReferenceOTU283292$$[u'k__Bacteria', u'p__Proteobacteria', u'c__Gammaproteobacteria', u'o__Xanthomonadales', u'f__Sinobacteraceae', u'g__', u's__']
1576	New.CleanUp.ReferenceOTU286945$$[u'k__Bacteria', u'p__Chloroflexi', u'c__Chloroflexi', u'o__[Roseiflexales]', u'f__[Kouleothrixaceae]', u'g__', u's__']
1577	New.CleanUp.ReferenceOTU288950$$[u'k__Bacteria', u'p__Actinobacteria', u'c__Acidimicrobiia', u'o__Acidimicrobiales', u'f__', u'g__', u's__']
1578	New.CleanUp.ReferenceOTU291302$$[u'k__Bacteria', u'p__Firmicutes', u'c__Bacilli', u'o__Bacillales', u'f__Planococcaceae', u'g__Sporosarcina', u's__']
1579	New.CleanUp.ReferenceOTU291484$$[u'k__Bacteria', u'p__Proteobacteria', u'c__Alphaproteobacteria', u'o__Rhizobiales', u'f__Hyphomicrobiaceae', u'g__Rhodoplanes', u's__']
1580	New.CleanUp.ReferenceOTU292000$$[u'k__Bacteria', u'p__Firmicutes', u'c__Clostridia', u'o__Clostridiales', u'f__Veillonellaceae', u'g__', u's__']
1581	New.CleanUp.ReferenceOTU302107$$[u'k__Bacteria', u'p__Planctomycetes', u'c__Planctomycetia', u'o__Planctomycetales', u'f__Planctomycetaceae', u'g__Planctomyces', u's__']
1582	New.CleanUp.ReferenceOTU306452$$[u'k__Bacteria', u'p__Proteobacteria', u'c__Deltaproteobacteria', u'o__Myxococcales', u'f__', u'g__', u's__']
1583	New.CleanUp.ReferenceOTU308411$$[u'k__Bacteria', u'p__Verrucomicrobia', u'c__[Pedosphaerae]', u'o__[Pedosphaerales]', u'f__Ellin517', u'g__', u's__']
1584	New.CleanUp.ReferenceOTU309006$$[u'k__Bacteria', u'p__Planctomycetes', u'c__Phycisphaerae', u'o__WD2101', u'f__', u'g__', u's__']
1585	New.CleanUp.ReferenceOTU311771$$[u'k__Bacteria', u'p__Gemmatimonadetes', u'c__Gemmatimonadetes', u'o__Gemmatimonadales', u'f__Ellin5301', u'g__', u's__']
1586	New.CleanUp.ReferenceOTU312394$$[u'k__Bacteria', u'p__Proteobacteria', u'c__Deltaproteobacteria', u'o__Myxococcales']
1587	New.CleanUp.ReferenceOTU319504$$[u'k__Bacteria', u'p__Acidobacteria', u'c__iii1-8', u'o__DS-18', u'f__', u'g__', u's__']
1588	New.CleanUp.ReferenceOTU319896$$[u'k__Bacteria', u'p__Nitrospirae', u'c__Nitrospira', u'o__Nitrospirales', u'f__0319-6A21', u'g__', u's__']
1589	New.CleanUp.ReferenceOTU320617$$[u'k__Bacteria', u'p__Bacteroidetes', u'c__Cytophagia', u'o__Cytophagales', u'f__Cytophagaceae', u'g__', u's__']
1590	New.CleanUp.ReferenceOTU320623$$[u'k__Bacteria', u'p__Proteobacteria', u'c__Betaproteobacteria', u'o__SC-I-84', u'f__', u'g__', u's__']
1591	New.CleanUp.ReferenceOTU321578$$[u'k__Bacteria', u'p__Acidobacteria', u'c__Acidobacteria-6', u'o__iii1-15', u'f__mb2424', u'g__', u's__']
1592	New.CleanUp.ReferenceOTU329739$$[u'k__Bacteria', u'p__Planctomycetes', u'c__Phycisphaerae', u'o__WD2101', u'f__', u'g__', u's__']
1593	New.CleanUp.ReferenceOTU331948$$[u'k__Bacteria', u'p__Acidobacteria', u'c__Solibacteres', u'o__Solibacterales', u'f__Solibacteraceae', u'g__Candidatus Solibacter', u's__']
1594	New.CleanUp.ReferenceOTU332829$$[u'k__Bacteria', u'p__Proteobacteria', u'c__Deltaproteobacteria', u'o__Myxococcales', u'f__', u'g__', u's__']
1595	New.CleanUp.ReferenceOTU334034$$[u'k__Bacteria', u'p__Proteobacteria', u'c__Alphaproteobacteria', u'o__Rhodobacterales', u'f__Hyphomonadaceae', u'g__', u's__']
1596	New.CleanUp.ReferenceOTU337084$$[u'k__Bacteria', u'p__Planctomycetes', u'c__Phycisphaerae', u'o__WD2101', u'f__', u'g__', u's__']
1597	New.CleanUp.ReferenceOTU342183$$[u'k__Bacteria', u'p__Proteobacteria', u'c__Deltaproteobacteria', u'o__Myxococcales', u'f__', u'g__', u's__']
1598	New.CleanUp.ReferenceOTU344320$$[u'k__Bacteria', u'p__Acidobacteria', u'c__Sva0725', u'o__Sva0725', u'f__', u'g__', u's__']
1599	New.CleanUp.ReferenceOTU344364$$[u'k__Bacteria', u'p__Proteobacteria', u'c__Alphaproteobacteria', u'o__Rhodospirillales', u'f__Rhodospirillaceae', u'g__', u's__']
1600	New.CleanUp.ReferenceOTU346671$$[u'k__Bacteria', u'p__Proteobacteria', u'c__Betaproteobacteria', u'o__Burkholderiales', u'f__Comamonadaceae']
1601	New.CleanUp.ReferenceOTU347680$$[u'k__Bacteria', u'p__Planctomycetes', u'c__Planctomycetia', u'o__Pirellulales', u'f__Pirellulaceae', u'g__', u's__']
1602	New.CleanUp.ReferenceOTU349141$$[u'k__Bacteria', u'p__Proteobacteria', u'c__Betaproteobacteria', u'o__SBla14', u'f__', u'g__', u's__']
1603	New.CleanUp.ReferenceOTU351451$$[u'k__Bacteria', u'p__Planctomycetes', u'c__Planctomycetia', u'o__Gemmatales', u'f__Gemmataceae', u'g__', u's__']
1604	New.CleanUp.ReferenceOTU352808$$[u'k__Bacteria', u'p__Planctomycetes', u'c__Phycisphaerae', u'o__Phycisphaerales', u'f__', u'g__', u's__']
1605	New.CleanUp.ReferenceOTU353231$$[u'k__Bacteria', u'p__Planctomycetes', u'c__Phycisphaerae', u'o__WD2101', u'f__', u'g__', u's__']
1606	New.CleanUp.ReferenceOTU356397$$[u'k__Bacteria', u'p__Planctomycetes', u'c__Phycisphaerae', u'o__WD2101', u'f__', u'g__', u's__']
1607	New.CleanUp.ReferenceOTU356908$$[u'k__Bacteria', u'p__Chloroflexi', u'c__TK17', u'o__mle1-48', u'f__', u'g__', u's__']
1608	New.CleanUp.ReferenceOTU363917$$[u'k__Bacteria', u'p__Proteobacteria', u'c__Deltaproteobacteria', u'o__Myxococcales', u'f__', u'g__', u's__']
1609	New.CleanUp.ReferenceOTU365342$$[u'k__Bacteria', u'p__Proteobacteria', u'c__Alphaproteobacteria', u'o__Rhizobiales', u'f__Beijerinckiaceae']
1610	New.CleanUp.ReferenceOTU371673$$[u'k__Bacteria', u'p__Planctomycetes', u'c__Planctomycetia', u'o__Gemmatales', u'f__Gemmataceae', u'g__', u's__']
1611	New.CleanUp.ReferenceOTU381813$$[u'k__Bacteria', u'p__Acidobacteria', u'c__RB25', u'o__', u'f__', u'g__', u's__']
1612	New.CleanUp.ReferenceOTU382669$$[u'k__Bacteria', u'p__Gemmatimonadetes', u'c__Gemmatimonadetes']
1613	New.CleanUp.ReferenceOTU387427$$[u'k__Bacteria', u'p__Acidobacteria', u'c__Acidobacteria-6', u'o__iii1-15', u'f__', u'g__', u's__']
1614	New.CleanUp.ReferenceOTU390586$$[u'k__Bacteria', u'p__Bacteroidetes', u'c__[Saprospirae]', u'o__[Saprospirales]', u'f__Chitinophagaceae', u'g__', u's__']
1615	New.CleanUp.ReferenceOTU392140$$[u'k__Bacteria', u'p__Gemmatimonadetes', u'c__Gemmatimonadetes', u'o__Gemmatimonadales', u'f__Ellin5301', u'g__', u's__']
1616	New.CleanUp.ReferenceOTU392234$$[u'k__Bacteria', u'p__Acidobacteria', u'c__[Chloracidobacteria]', u'o__RB41', u'f__', u'g__', u's__']
1617	New.CleanUp.ReferenceOTU392244$$[u'k__Bacteria', u'p__Proteobacteria', u'c__Betaproteobacteria']
1618	New.CleanUp.ReferenceOTU392636$$[u'k__Bacteria', u'p__Proteobacteria', u'c__Betaproteobacteria', u'o__Rhodocyclales', u'f__Rhodocyclaceae']
1619	New.CleanUp.ReferenceOTU393015$$[u'k__Bacteria', u'p__Proteobacteria', u'c__Alphaproteobacteria', u'o__Rhizobiales']
1620	New.CleanUp.ReferenceOTU394568$$[u'k__Bacteria', u'p__Proteobacteria', u'c__Deltaproteobacteria', u'o__Desulfuromonadales', u'f__Geobacteraceae', u'g__Geobacter', u's__']
1621	New.CleanUp.ReferenceOTU395228$$[u'k__Bacteria', u'p__Proteobacteria', u'c__Betaproteobacteria', u'o__Rhodocyclales', u'f__Rhodocyclaceae', u'g__Propionivibrio', u's__']
1622	New.CleanUp.ReferenceOTU395916$$[u'k__Bacteria', u'p__Proteobacteria', u'c__Gammaproteobacteria', u'o__Alteromonadales', u'f__[Chromatiaceae]', u'g__Rheinheimera', u's__']
1623	New.CleanUp.ReferenceOTU399274$$[u'k__Bacteria', u'p__Acidobacteria', u'c__[Chloracidobacteria]', u'o__DS-100', u'f__', u'g__', u's__']
1624	New.CleanUp.ReferenceOTU402063$$[u'k__Bacteria', u'p__Planctomycetes', u'c__Phycisphaerae', u'o__WD2101', u'f__', u'g__', u's__']
1625	New.CleanUp.ReferenceOTU403250$$[u'k__Bacteria', u'p__Proteobacteria', u'c__Alphaproteobacteria', u'o__Sphingomonadales']
1626	New.CleanUp.ReferenceOTU403989$$[u'k__Bacteria', u'p__Proteobacteria', u'c__Gammaproteobacteria', u'o__HTCC2188', u'f__HTCC2089', u'g__', u's__']
1627	New.CleanUp.ReferenceOTU414435$$[u'k__Bacteria', u'p__Proteobacteria', u'c__Deltaproteobacteria', u'o__Myxococcales', u'f__Haliangiaceae', u'g__', u's__']
1628	New.CleanUp.ReferenceOTU414545$$[u'k__Bacteria', u'p__Proteobacteria', u'c__Betaproteobacteria', u'o__Rhodocyclales', u'f__Rhodocyclaceae']
1629	New.CleanUp.ReferenceOTU415095$$[u'k__Bacteria', u'p__Actinobacteria', u'c__MB-A2-108', u'o__0319-7L14', u'f__', u'g__', u's__']
1630	New.CleanUp.ReferenceOTU417485$$[u'k__Bacteria', u'p__Acidobacteria', u'c__[Chloracidobacteria]', u'o__DS-100', u'f__', u'g__', u's__']
1631	New.CleanUp.ReferenceOTU417598$$[u'k__Bacteria', u'p__Proteobacteria', u'c__Gammaproteobacteria', u'o__Xanthomonadales', u'f__Xanthomonadaceae']
1632	New.CleanUp.ReferenceOTU420347$$[u'k__Bacteria', u'p__Planctomycetes', u'c__Phycisphaerae', u'o__WD2101', u'f__', u'g__', u's__']
1633	New.CleanUp.ReferenceOTU420846$$[u'k__Bacteria', u'p__Proteobacteria', u'c__Betaproteobacteria', u'o__Rhodocyclales', u'f__Rhodocyclaceae']
1634	New.CleanUp.ReferenceOTU421765$$[u'k__Bacteria', u'p__Acidobacteria', u'c__Acidobacteria-6']
1635	New.CleanUp.ReferenceOTU425443$$[u'k__Bacteria', u'p__Proteobacteria', u'c__Alphaproteobacteria', u'o__Rhizobiales', u'f__', u'g__', u's__']
1636	New.CleanUp.ReferenceOTU430459$$[u'k__Bacteria', u'p__Proteobacteria', u'c__Alphaproteobacteria', u'o__Sphingomonadales', u'f__Sphingomonadaceae']
1637	New.CleanUp.ReferenceOTU431371$$[u'k__Bacteria', u'p__Acidobacteria', u'c__Acidobacteria-5', u'o__', u'f__', u'g__', u's__']
1638	New.CleanUp.ReferenceOTU433447$$[u'k__Bacteria', u'p__Planctomycetes', u'c__Phycisphaerae', u'o__WD2101', u'f__', u'g__', u's__']
1639	New.CleanUp.ReferenceOTU442492$$[u'k__Bacteria', u'p__Planctomycetes', u'c__028H05-P-BN-P5', u'o__', u'f__', u'g__', u's__']
1640	New.CleanUp.ReferenceOTU445122$$[u'k__Bacteria', u'p__Actinobacteria', u'c__Acidimicrobiia', u'o__Acidimicrobiales', u'f__', u'g__', u's__']
1641	New.CleanUp.ReferenceOTU445185$$[u'k__Bacteria', u'p__Actinobacteria', u'c__MB-A2-108', u'o__0319-7L14', u'f__', u'g__', u's__']
1642	New.CleanUp.ReferenceOTU446610$$[u'k__Bacteria', u'p__Proteobacteria', u'c__Deltaproteobacteria', u'o__Myxococcales', u'f__', u'g__', u's__']
1643	New.CleanUp.ReferenceOTU446651$$[u'k__Bacteria', u'p__Planctomycetes', u'c__Planctomycetia', u'o__Pirellulales', u'f__Pirellulaceae', u'g__A17', u's__']
1644	New.CleanUp.ReferenceOTU449380$$[u'k__Bacteria', u'p__Bacteroidetes', u'c__Cytophagia', u'o__Cytophagales', u'f__Cytophagaceae', u'g__', u's__']
1645	New.CleanUp.ReferenceOTU451181$$[u'k__Bacteria', u'p__Actinobacteria', u'c__OPB41', u'o__', u'f__', u'g__', u's__']
1646	New.CleanUp.ReferenceOTU455805$$[u'k__Bacteria', u'p__Planctomycetes', u'c__Phycisphaerae', u'o__Phycisphaerales', u'f__', u'g__', u's__']
1647	New.CleanUp.ReferenceOTU456874$$[u'k__Bacteria', u'p__Chloroflexi', u'c__Thermomicrobia', u'o__JG30-KF-CM45', u'f__', u'g__', u's__']
1648	New.CleanUp.ReferenceOTU457803$$[u'k__Bacteria', u'p__Proteobacteria', u'c__Deltaproteobacteria', u'o__Myxococcales', u'f__', u'g__', u's__']
1649	New.CleanUp.ReferenceOTU460063$$[u'k__Bacteria', u'p__Proteobacteria', u'c__Gammaproteobacteria', u'o__Xanthomonadales', u'f__Xanthomonadaceae', u'g__Lysobacter', u's__']
1650	New.CleanUp.ReferenceOTU460091$$[u'k__Bacteria', u'p__Planctomycetes', u'c__Phycisphaerae', u'o__Phycisphaerales', u'f__', u'g__', u's__']
1651	New.CleanUp.ReferenceOTU464321$$[u'k__Bacteria', u'p__Planctomycetes', u'c__Phycisphaerae', u'o__WD2101', u'f__', u'g__', u's__']
1652	New.CleanUp.ReferenceOTU465916$$[u'k__Bacteria', u'p__Chloroflexi', u'c__Chloroflexi', u'o__AKIW781', u'f__', u'g__', u's__']
1653	New.CleanUp.ReferenceOTU468728$$[u'k__Bacteria', u'p__Proteobacteria', u'c__Alphaproteobacteria', u'o__Rhodospirillales', u'f__Rhodospirillaceae', u'g__', u's__']
1654	New.CleanUp.ReferenceOTU471249$$[u'k__Bacteria', u'p__Actinobacteria', u'c__Actinobacteria', u'o__Actinomycetales', u'f__Micromonosporaceae']
1655	New.CleanUp.ReferenceOTU474454$$[u'k__Bacteria', u'p__Chloroflexi', u'c__Anaerolineae', u'o__A31', u'f__S47', u'g__', u's__']
1656	New.CleanUp.ReferenceOTU476192$$[u'k__Bacteria', u'p__Planctomycetes', u'c__Phycisphaerae', u'o__Phycisphaerales', u'f__', u'g__', u's__']
1657	New.CleanUp.ReferenceOTU479391$$[u'k__Bacteria', u'p__Proteobacteria', u'c__Deltaproteobacteria', u'o__Myxococcales', u'f__Nannocystaceae', u'g__Plesiocystis', u's__']
1658	New.CleanUp.ReferenceOTU479564$$[u'k__Bacteria', u'p__Acidobacteria', u'c__[Chloracidobacteria]', u'o__RB41', u'f__Ellin6075', u'g__', u's__']
1659	New.CleanUp.ReferenceOTU479681$$[u'k__Bacteria', u'p__OD1', u'c__ZB2', u'o__', u'f__', u'g__', u's__']
1660	New.CleanUp.ReferenceOTU481500$$[u'k__Bacteria', u'p__Planctomycetes', u'c__Phycisphaerae', u'o__WD2101', u'f__', u'g__', u's__']
1661	New.CleanUp.ReferenceOTU487270$$[u'k__Bacteria', u'p__Proteobacteria', u'c__Betaproteobacteria', u'o__', u'f__', u'g__', u's__']
1662	New.CleanUp.ReferenceOTU502806$$[u'k__Bacteria', u'p__Planctomycetes', u'c__OM190', u'o__agg27', u'f__', u'g__', u's__']
1663	New.CleanUp.ReferenceOTU504219$$[u'k__Bacteria', u'p__Proteobacteria', u'c__Alphaproteobacteria', u'o__Rhizobiales']
1664	New.CleanUp.ReferenceOTU509741$$[u'k__Bacteria', u'p__Proteobacteria', u'c__Betaproteobacteria', u'o__Hydrogenophilales', u'f__Hydrogenophilaceae', u'g__Thiobacillus', u's__']
1665	New.CleanUp.ReferenceOTU512691$$[u'k__Bacteria', u'p__Actinobacteria', u'c__Actinobacteria', u'o__Actinomycetales', u'f__Thermomonosporaceae', u'g__Actinoallomurus']
1666	New.CleanUp.ReferenceOTU513077$$[u'k__Bacteria', u'p__Acidobacteria', u'c__Acidobacteria-6', u'o__iii1-15', u'f__', u'g__', u's__']
1667	New.CleanUp.ReferenceOTU515176$$[u'k__Bacteria', u'p__Proteobacteria', u'c__Alphaproteobacteria', u'o__Rhodospirillales', u'f__Rhodospirillaceae', u'g__Azospirillum', u's__']
1668	New.CleanUp.ReferenceOTU515369$$[u'k__Bacteria', u'p__Acidobacteria', u'c__Acidobacteria-6', u'o__iii1-15', u'f__mb2424', u'g__', u's__']
1669	New.CleanUp.ReferenceOTU526012$$[u'k__Bacteria', u'p__Planctomycetes', u'c__Planctomycetia', u'o__Gemmatales', u'f__Isosphaeraceae']
1670	New.CleanUp.ReferenceOTU526721$$[u'k__Bacteria', u'p__Acidobacteria', u'c__Acidobacteria-6', u'o__iii1-15', u'f__RB40', u'g__', u's__']
1671	New.CleanUp.ReferenceOTU527269$$[u'k__Bacteria', u'p__Planctomycetes', u'c__Planctomycetia', u'o__Gemmatales', u'f__Gemmataceae', u'g__', u's__']
1672	New.CleanUp.ReferenceOTU528237$$[u'k__Bacteria', u'p__Planctomycetes', u'c__Planctomycetia', u'o__Gemmatales', u'f__Isosphaeraceae', u'g__', u's__']
1673	New.CleanUp.ReferenceOTU531768$$[u'k__Bacteria', u'p__Proteobacteria', u'c__Alphaproteobacteria', u'o__Sphingomonadales', u'f__Sphingomonadaceae']
1674	New.CleanUp.ReferenceOTU543002$$[u'k__Bacteria', u'p__Planctomycetes', u'c__Planctomycetia', u'o__Gemmatales', u'f__Isosphaeraceae']
1675	New.CleanUp.ReferenceOTU544528$$[u'k__Bacteria', u'p__Proteobacteria', u'c__Deltaproteobacteria', u'o__Myxococcales', u'f__Polyangiaceae', u'g__', u's__']
1676	New.CleanUp.ReferenceOTU545151$$[u'k__Bacteria', u'p__Proteobacteria', u'c__Deltaproteobacteria', u'o__Desulfuromonadales', u'f__Geobacteraceae', u'g__Geobacter', u's__']
1677	New.CleanUp.ReferenceOTU561030$$[u'k__Bacteria', u'p__Planctomycetes', u'c__Planctomycetia', u'o__Pirellulales', u'f__Pirellulaceae', u'g__', u's__']
1678	New.CleanUp.ReferenceOTU561625$$[u'k__Bacteria', u'p__Verrucomicrobia', u'c__Verrucomicrobiae', u'o__Verrucomicrobiales', u'f__Verrucomicrobiaceae', u'g__', u's__']
1679	New.CleanUp.ReferenceOTU562043$$[u'k__Bacteria', u'p__Proteobacteria', u'c__Betaproteobacteria', u'o__MND1', u'f__', u'g__', u's__']
1680	New.CleanUp.ReferenceOTU572731$$[u'k__Bacteria', u'p__Planctomycetes', u'c__Planctomycetia', u'o__Pirellulales', u'f__Pirellulaceae', u'g__', u's__']
1681	New.CleanUp.ReferenceOTU573011$$[u'k__Bacteria', u'p__Verrucomicrobia', u'c__[Pedosphaerae]', u'o__[Pedosphaerales]', u'f__Ellin517', u'g__', u's__']
1682	New.CleanUp.ReferenceOTU576449$$[u'k__Bacteria', u'p__Acidobacteria', u'c__Holophagae', u'o__Holophagales', u'f__Holophagaceae', u'g__', u's__']
1683	New.CleanUp.ReferenceOTU578688$$[u'k__Bacteria', u'p__Proteobacteria', u'c__Alphaproteobacteria', u'o__Rhizobiales', u'f__Bradyrhizobiaceae', u'g__Balneimonas', u's__']
1684	New.CleanUp.ReferenceOTU579631$$[u'k__Bacteria', u'p__Acidobacteria', u'c__Acidobacteria-6', u'o__iii1-15', u'f__RB40', u'g__', u's__']
1685	New.CleanUp.ReferenceOTU583417$$[u'k__Bacteria', u'p__Gemmatimonadetes', u'c__Gemmatimonadetes', u'o__Gemmatimonadales', u'f__Ellin5301', u'g__', u's__']
1686	New.CleanUp.ReferenceOTU591407$$[u'k__Bacteria', u'p__Actinobacteria', u'c__MB-A2-108', u'o__0319-7L14', u'f__', u'g__', u's__']
1687	New.CleanUp.ReferenceOTU591901$$[u'k__Bacteria', u'p__Proteobacteria', u'c__Gammaproteobacteria', u'o__Pseudomonadales', u'f__Pseudomonadaceae', u'g__Pseudomonas', u's__alcaligenes']
1688	New.CleanUp.ReferenceOTU592823$$[u'k__Bacteria', u'p__Planctomycetes', u'c__Planctomycetia', u'o__Pirellulales', u'f__Pirellulaceae', u'g__Pirellula', u's__']
1689	New.CleanUp.ReferenceOTU594616$$[u'k__Bacteria', u'p__Proteobacteria', u'c__Alphaproteobacteria', u'o__Rhodospirillales', u'f__Rhodospirillaceae', u'g__', u's__']
1690	New.CleanUp.ReferenceOTU597146$$[u'k__Bacteria', u'p__Planctomycetes', u'c__Planctomycetia', u'o__Planctomycetales', u'f__Planctomycetaceae', u'g__Planctomyces', u's__']
1691	New.CleanUp.ReferenceOTU597796$$[u'k__Bacteria', u'p__Actinobacteria', u'c__Actinobacteria', u'o__Actinomycetales', u'f__Nocardioidaceae', u'g__', u's__']
1692	New.CleanUp.ReferenceOTU598613$$[u'k__Bacteria', u'p__Gemmatimonadetes', u'c__Gemm-3', u'o__', u'f__', u'g__', u's__']
1693	New.CleanUp.ReferenceOTU598681$$[u'k__Bacteria', u'p__Proteobacteria', u'c__Deltaproteobacteria', u'o__Desulfuromonadales', u'f__Geobacteraceae', u'g__Geobacter']
1694	New.CleanUp.ReferenceOTU603991$$[u'k__Bacteria', u'p__Verrucomicrobia', u'c__[Pedosphaerae]', u'o__[Pedosphaerales]', u'f__Ellin517', u'g__', u's__']
1695	New.CleanUp.ReferenceOTU605374$$[u'k__Bacteria', u'p__Proteobacteria', u'c__Alphaproteobacteria', u'o__Rhizobiales', u'f__Hyphomicrobiaceae']
1696	New.CleanUp.ReferenceOTU605530$$[u'k__Bacteria', u'p__Gemmatimonadetes', u'c__Gemmatimonadetes', u'o__N1423WL', u'f__', u'g__', u's__']
1697	New.CleanUp.ReferenceOTU607677$$[u'k__Bacteria', u'p__Bacteroidetes', u'c__Cytophagia', u'o__Cytophagales', u'f__Cytophagaceae', u'g__', u's__']
1698	New.CleanUp.ReferenceOTU608616$$[u'k__Bacteria', u'p__Planctomycetes', u'c__Phycisphaerae', u'o__WD2101', u'f__', u'g__', u's__']
1699	New.CleanUp.ReferenceOTU609413$$[u'k__Bacteria', u'p__WS3', u'c__PRR-12', u'o__Sediment-1', u'f__PRR-10', u'g__', u's__']
1700	New.CleanUp.ReferenceOTU610112$$[u'k__Bacteria', u'p__Planctomycetes', u'c__OM190', u'o__agg27', u'f__', u'g__', u's__']
1701	New.CleanUp.ReferenceOTU614068$$[u'k__Bacteria', u'p__Proteobacteria', u'c__Alphaproteobacteria', u'o__Rhizobiales', u'f__', u'g__', u's__']
1702	New.CleanUp.ReferenceOTU616696$$[u'k__Bacteria', u'p__Acidobacteria', u'c__iii1-8', u'o__DS-18', u'f__', u'g__', u's__']
1703	New.CleanUp.ReferenceOTU616746$$[u'k__Bacteria', u'p__Proteobacteria', u'c__Deltaproteobacteria', u'o__Desulfobacterales', u'f__Desulfobulbaceae', u'g__Desulfobulbus', u's__']
1704	New.CleanUp.ReferenceOTU624799$$[u'k__Bacteria', u'p__Acidobacteria', u'c__Acidobacteria-6', u'o__iii1-15', u'f__mb2424', u'g__', u's__']
1705	New.CleanUp.ReferenceOTU629585$$[u'k__Bacteria', u'p__Proteobacteria', u'c__Betaproteobacteria', u'o__A21b', u'f__EB1003', u'g__', u's__']
1706	New.CleanUp.ReferenceOTU632316$$[u'k__Bacteria', u'p__Proteobacteria', u'c__Gammaproteobacteria', u'o__Xanthomonadales', u'f__Xanthomonadaceae', u'g__Dokdonella', u's__']
1707	New.CleanUp.ReferenceOTU638805$$[u'k__Bacteria', u'p__Actinobacteria', u'c__Actinobacteria', u'o__Actinomycetales', u'f__Intrasporangiaceae']
1708	New.CleanUp.ReferenceOTU643814$$[u'k__Bacteria', u'p__Planctomycetes', u'c__Planctomycetia', u'o__Pirellulales', u'f__Pirellulaceae', u'g__Pirellula', u's__']
1709	New.CleanUp.ReferenceOTU646229$$[u'k__Bacteria', u'p__Verrucomicrobia', u'c__[Spartobacteria]', u'o__[Chthoniobacterales]', u'f__[Chthoniobacteraceae]', u'g__DA101', u's__']
1710	New.CleanUp.ReferenceOTU647860$$[u'k__Bacteria', u'p__Actinobacteria', u'c__Acidimicrobiia', u'o__Acidimicrobiales', u'f__', u'g__', u's__']
1711	New.CleanUp.ReferenceOTU652310$$[u'k__Bacteria', u'p__Actinobacteria', u'c__Thermoleophilia', u'o__Gaiellales', u'f__Gaiellaceae', u'g__', u's__']
1712	New.CleanUp.ReferenceOTU656019$$[u'k__Bacteria', u'p__Planctomycetes', u'c__Phycisphaerae', u'o__WD2101', u'f__', u'g__', u's__']
1713	New.CleanUp.ReferenceOTU658754$$[u'k__Bacteria', u'p__Gemmatimonadetes', u'c__Gemm-1', u'o__', u'f__', u'g__', u's__']
1714	New.CleanUp.ReferenceOTU666041$$[u'k__Bacteria', u'p__Chloroflexi', u'c__Chloroflexi', u'o__[Roseiflexales]', u'f__[Kouleothrixaceae]', u'g__', u's__']
1715	New.CleanUp.ReferenceOTU667729$$[u'k__Bacteria', u'p__OD1', u'c__', u'o__', u'f__', u'g__', u's__']
1716	New.CleanUp.ReferenceOTU668624$$[u'k__Bacteria', u'p__Acidobacteria', u'c__Acidobacteria-6', u'o__iii1-15', u'f__', u'g__', u's__']
1717	New.CleanUp.ReferenceOTU673966$$[u'k__Bacteria', u'p__Planctomycetes', u'c__Phycisphaerae', u'o__WD2101', u'f__', u'g__', u's__']
1718	New.CleanUp.ReferenceOTU675396$$[u'k__Bacteria', u'p__Gemmatimonadetes', u'c__Gemmatimonadetes', u'o__N1423WL', u'f__', u'g__', u's__']
1719	New.CleanUp.ReferenceOTU681086$$[u'k__Bacteria', u'p__Firmicutes', u'c__Clostridia', u'o__Clostridiales', u'f__Veillonellaceae']
1720	New.CleanUp.ReferenceOTU681190$$[u'k__Bacteria', u'p__Acidobacteria', u'c__[Chloracidobacteria]', u'o__RB41', u'f__Ellin6075', u'g__', u's__']
1721	New.CleanUp.ReferenceOTU681292$$[u'k__Bacteria', u'p__Planctomycetes', u'c__Planctomycetia', u'o__Pirellulales', u'f__Pirellulaceae', u'g__Pirellula', u's__']
1722	New.CleanUp.ReferenceOTU682472$$[u'k__Bacteria', u'p__Planctomycetes', u'c__Phycisphaerae', u'o__WD2101', u'f__', u'g__', u's__']
1723	New.CleanUp.ReferenceOTU686937$$[u'k__Bacteria', u'p__Gemmatimonadetes', u'c__Gemmatimonadetes', u'o__N1423WL', u'f__', u'g__', u's__']
1724	New.CleanUp.ReferenceOTU695508$$[u'k__Bacteria', u'p__WS3', u'c__PRR-12', u'o__Sediment-1', u'f__PRR-10', u'g__', u's__']
1725	New.CleanUp.ReferenceOTU697642$$[u'k__Bacteria', u'p__Bacteroidetes', u'c__[Saprospirae]', u'o__[Saprospirales]', u'f__Chitinophagaceae', u'g__', u's__']
1726	New.CleanUp.ReferenceOTU704091$$[u'k__Bacteria', u'p__Bacteroidetes', u'c__Cytophagia', u'o__Cytophagales', u'f__Cytophagaceae', u'g__Leadbetterella', u's__']
1727	New.CleanUp.ReferenceOTU704317$$[u'k__Bacteria', u'p__Proteobacteria', u'c__Betaproteobacteria', u'o__Rhodocyclales', u'f__Rhodocyclaceae']
1728	New.CleanUp.ReferenceOTU706309$$[u'k__Bacteria', u'p__Acidobacteria', u'c__Solibacteres', u'o__Solibacterales', u'f__', u'g__', u's__']
1729	New.CleanUp.ReferenceOTU706395$$[u'k__Bacteria', u'p__FBP', u'c__', u'o__', u'f__', u'g__', u's__']
1730	New.CleanUp.ReferenceOTU707325$$[u'k__Bacteria', u'p__Proteobacteria', u'c__Gammaproteobacteria', u'o__Xanthomonadales', u'f__Xanthomonadaceae', u'g__Lysobacter']
1731	New.CleanUp.ReferenceOTU708186$$[u'k__Bacteria', u'p__Verrucomicrobia', u'c__[Pedosphaerae]', u'o__[Pedosphaerales]', u'f__Ellin515', u'g__', u's__']
1732	New.CleanUp.ReferenceOTU708218$$[u'k__Bacteria', u'p__Gemmatimonadetes', u'c__Gemmatimonadetes', u'o__', u'f__', u'g__', u's__']
1733	New.CleanUp.ReferenceOTU714460$$[u'k__Bacteria', u'p__Bacteroidetes', u'c__Flavobacteriia', u'o__Flavobacteriales', u'f__Cryomorphaceae', u'g__Fluviicola', u's__']
1734	New.CleanUp.ReferenceOTU715286$$[u'k__Bacteria', u'p__Proteobacteria', u'c__Deltaproteobacteria', u'o__Syntrophobacterales', u'f__Syntrophobacteraceae', u'g__', u's__']
1735	New.CleanUp.ReferenceOTU716367$$[u'k__Bacteria', u'p__Chloroflexi', u'c__Ellin6529', u'o__', u'f__', u'g__', u's__']
1736	New.CleanUp.ReferenceOTU716421$$[u'k__Bacteria', u'p__Chloroflexi', u'c__S085', u'o__', u'f__', u'g__', u's__']
1737	New.CleanUp.ReferenceOTU719719$$[u'k__Bacteria', u'p__Proteobacteria', u'c__Deltaproteobacteria', u'o__NB1-j', u'f__', u'g__', u's__']
1738	New.CleanUp.ReferenceOTU720480$$[u'k__Bacteria', u'p__Planctomycetes', u'c__Phycisphaerae', u'o__WD2101', u'f__', u'g__', u's__']
1739	New.CleanUp.ReferenceOTU722631$$[u'k__Bacteria', u'p__Acidobacteria', u'c__[Chloracidobacteria]', u'o__PK29', u'f__', u'g__', u's__']
1740	New.CleanUp.ReferenceOTU731123$$[u'k__Bacteria', u'p__Proteobacteria', u'c__Alphaproteobacteria', u'o__Rhizobiales']
1741	New.CleanUp.ReferenceOTU737284$$[u'k__Bacteria', u'p__Planctomycetes', u'c__Phycisphaerae', u'o__WD2101', u'f__', u'g__', u's__']
1742	New.CleanUp.ReferenceOTU741385$$[u'k__Bacteria', u'p__Proteobacteria', u'c__Alphaproteobacteria', u'o__Rhizobiales', u'f__Bradyrhizobiaceae']
1743	New.CleanUp.ReferenceOTU743070$$[u'k__Bacteria', u'p__Armatimonadetes', u'c__[Fimbriimonadia]', u'o__[Fimbriimonadales]', u'f__[Fimbriimonadaceae]', u'g__', u's__']
1744	New.CleanUp.ReferenceOTU746034$$[u'k__Bacteria', u'p__Actinobacteria', u'c__Acidimicrobiia', u'o__Acidimicrobiales', u'f__EB1017', u'g__', u's__']
1745	New.CleanUp.ReferenceOTU748554$$[u'k__Bacteria', u'p__Acidobacteria', u'c__Acidobacteria-6', u'o__iii1-15', u'f__', u'g__', u's__']
1746	New.CleanUp.ReferenceOTU749272$$[u'k__Bacteria', u'p__Planctomycetes', u'c__C6', u'o__MVS-107', u'f__', u'g__', u's__']
1747	New.CleanUp.ReferenceOTU753473$$[u'k__Bacteria', u'p__Acidobacteria', u'c__Acidobacteria-6', u'o__iii1-15', u'f__RB40', u'g__', u's__']
1748	New.CleanUp.ReferenceOTU754238$$[u'k__Bacteria', u'p__Proteobacteria', u'c__Deltaproteobacteria', u'o__Myxococcales', u'f__OM27', u'g__', u's__']
1749	New.CleanUp.ReferenceOTU756303$$[u'k__Bacteria', u'p__Proteobacteria', u'c__Alphaproteobacteria', u'o__Rhodobacterales', u'f__Rhodobacteraceae', u'g__Amaricoccus', u's__']
1750	New.CleanUp.ReferenceOTU758161$$[u'k__Bacteria', u'p__Actinobacteria', u'c__Thermoleophilia', u'o__Solirubrobacterales', u'f__Patulibacteraceae', u'g__', u's__']

## Sheet: Root-DNA Cons
	x
1	853114$$[u'k__Bacteria', u'p__Bacteroidetes', u'c__[Saprospirae]', u'o__[Saprospirales]', u'f__Chitinophagaceae', u'g__', u's__']
2	161009$$[u'k__Bacteria', u'p__Bacteroidetes', u'c__[Saprospirae]', u'o__[Saprospirales]', u'f__Chitinophagaceae', u'g__', u's__']
3	770614$$[u'k__Bacteria', u'p__Proteobacteria', u'c__Deltaproteobacteria', u'o__Spirobacillales', u'f__', u'g__', u's__']
4	1136510$$[u'k__Bacteria', u'p__Proteobacteria', u'c__Betaproteobacteria', u'o__Burkholderiales', u'f__Comamonadaceae']
5	4366310$$[u'k__Bacteria', u'p__Proteobacteria', u'c__Deltaproteobacteria', u'o__Myxococcales', u'f__', u'g__', u's__']
6	208595$$[u'k__Bacteria', u'p__Bacteroidetes', u'c__[Saprospirae]', u'o__[Saprospirales]', u'f__Saprospiraceae', u'g__', u's__']
7	1108483$$[u'k__Bacteria', u'p__Proteobacteria', u'c__Betaproteobacteria', u'o__', u'f__', u'g__', u's__']
8	510204$$[u'k__Bacteria', u'p__Actinobacteria', u'c__Actinobacteria', u'o__Actinomycetales', u'f__Streptomycetaceae']
9	48487$$[u'k__Bacteria', u'p__Proteobacteria', u'c__Deltaproteobacteria', u'o__Myxococcales']
10	12074$$[u'k__Bacteria', u'p__Actinobacteria', u'c__Actinobacteria', u'o__Actinomycetales', u'f__Streptosporangiaceae', u'g__Streptosporangium', u's__']
11	4479035$$[u'k__Bacteria', u'p__Actinobacteria', u'c__Thermoleophilia', u'o__Solirubrobacterales', u'f__', u'g__', u's__']
12	269875$$[u'k__Bacteria', u'p__Proteobacteria', u'c__Deltaproteobacteria', u'o__Myxococcales', u'f__Haliangiaceae', u'g__', u's__']
13	1140307$$[u'k__Bacteria', u'p__Planctomycetes', u'c__Phycisphaerae', u'o__WD2101', u'f__', u'g__', u's__']
14	114170$$[u'k__Bacteria', u'p__Proteobacteria', u'c__Deltaproteobacteria', u'o__Myxococcales']
15	589123$$[u'k__Bacteria', u'p__Proteobacteria', u'c__Betaproteobacteria', u'o__Burkholderiales', u'f__Oxalobacteraceae']
16	351849$$[u'k__Bacteria', u'p__Proteobacteria', u'c__Alphaproteobacteria', u'o__Rhizobiales', u'f__Rhizobiaceae']
17	736813$$[u'k__Bacteria', u'p__Actinobacteria', u'c__Actinobacteria', u'o__Actinomycetales', u'f__Mycobacteriaceae', u'g__Mycobacterium']
18	142529$$[u'k__Bacteria', u'p__Proteobacteria', u'c__Betaproteobacteria', u'o__Burkholderiales', u'f__Comamonadaceae']
19	5419$$[u'k__Bacteria', u'p__Proteobacteria', u'c__Alphaproteobacteria', u'o__Rhizobiales', u'f__Rhizobiaceae', u'g__Agrobacterium', u's__']
20	890516$$[u'k__Bacteria', u'p__Actinobacteria', u'c__Actinobacteria', u'o__Actinomycetales']
21	576571$$[u'k__Bacteria', u'p__Actinobacteria', u'c__Actinobacteria', u'o__Actinomycetales', u'f__Streptomycetaceae', u'g__Streptomyces']
22	564690$$[u'k__Bacteria', u'p__Proteobacteria', u'c__Alphaproteobacteria', u'o__Rhodospirillales', u'f__Acetobacteraceae', u'g__', u's__']
23	582988$$[u'k__Bacteria', u'p__Bacteroidetes', u'c__Cytophagia', u'o__Cytophagales', u'f__Cytophagaceae', u'g__', u's__']
24	1109698$$[u'k__Bacteria', u'p__Chloroflexi', u'c__Ktedonobacteria', u'o__Thermogemmatisporales', u'f__Thermogemmatisporaceae', u'g__', u's__']
25	210633$$[u'k__Bacteria', u'p__Proteobacteria', u'c__Alphaproteobacteria', u'o__Rhizobiales', u'f__Hyphomicrobiaceae', u'g__Rhodoplanes', u's__']
26	512148$$[u'k__Bacteria', u'p__Actinobacteria', u'c__Thermoleophilia', u'o__Solirubrobacterales', u'f__', u'g__', u's__']
27	4321627$$[u'k__Bacteria', u'p__Proteobacteria', u'c__Deltaproteobacteria', u'o__Myxococcales']
28	209579$$[u'k__Bacteria', u'p__Proteobacteria', u'c__Alphaproteobacteria', u'o__Rhizobiales']
29	689696$$[u'k__Bacteria', u'p__Proteobacteria', u'c__Betaproteobacteria', u'o__Burkholderiales', u'f__Comamonadaceae']
30	4349320$$[u'k__Bacteria', u'p__Proteobacteria', u'c__Betaproteobacteria', u'o__Burkholderiales', u'f__Comamonadaceae']
31	3093679$$[u'k__Bacteria', u'p__Acidobacteria', u'c__Acidobacteria-6', u'o__iii1-15', u'f__', u'g__', u's__']
32	4397998$$[u'k__Bacteria', u'p__Proteobacteria', u'c__Alphaproteobacteria', u'o__Sphingomonadales', u'f__Sphingomonadaceae', u'g__Sphingobium', u's__']
33	2616888$$[u'k__Bacteria', u'p__Actinobacteria', u'c__Actinobacteria', u'o__Actinomycetales', u'f__Micromonosporaceae']
34	4465309$$[u'k__Bacteria', u'p__Actinobacteria', u'c__Acidimicrobiia', u'o__Acidimicrobiales', u'f__EB1017', u'g__', u's__']
35	2984015$$[u'k__Bacteria', u'p__Chloroflexi', u'c__Anaerolineae', u'o__envOPS12', u'f__', u'g__', u's__']
36	983648$$[u'k__Bacteria', u'p__Proteobacteria', u'c__Gammaproteobacteria', u'o__Alteromonadales', u'f__211ds20', u'g__', u's__']
37	1131545$$[u'k__Bacteria', u'p__Proteobacteria', u'c__Deltaproteobacteria', u'o__Myxococcales', u'f__', u'g__', u's__']
38	257647$$[u'k__Bacteria', u'p__Bacteroidetes', u'c__[Saprospirae]', u'o__[Saprospirales]', u'f__Chitinophagaceae']
39	4302304$$[u'k__Bacteria', u'p__Proteobacteria', u'c__Alphaproteobacteria', u'o__Rhodospirillales', u'f__Rhodospirillaceae', u'g__', u's__']
40	99510$$[u'k__Bacteria', u'p__Proteobacteria', u'c__Alphaproteobacteria', u'o__BD7-3', u'f__', u'g__', u's__']
41	168212$$[u'k__Bacteria', u'p__Proteobacteria', u'c__Alphaproteobacteria', u'o__Caulobacterales', u'f__Caulobacteraceae', u'g__', u's__']
42	1145384$$[u'k__Bacteria', u'p__Actinobacteria', u'c__Actinobacteria', u'o__Actinomycetales', u'f__Intrasporangiaceae', u'g__Oryzihumus', u's__leptocrescens']
43	585878$$[u'k__Bacteria', u'p__WS3', u'c__PRR-12', u'o__Sediment-1', u'f__', u'g__', u's__']
44	4430089$$[u'k__Bacteria', u'p__Proteobacteria', u'c__Gammaproteobacteria', u'o__Xanthomonadales', u'f__Xanthomonadaceae']
45	518645$$[u'k__Bacteria', u'p__Actinobacteria', u'c__Acidimicrobiia', u'o__Acidimicrobiales', u'f__', u'g__', u's__']
46	838297$$[u'k__Bacteria', u'p__Proteobacteria', u'c__Gammaproteobacteria', u'o__Xanthomonadales', u'f__Xanthomonadaceae', u'g__', u's__']
47	2788508$$[u'k__Bacteria', u'p__Proteobacteria', u'c__Deltaproteobacteria', u'o__Myxococcales', u'f__', u'g__', u's__']
48	819455$$[u'k__Bacteria', u'p__Proteobacteria', u'c__Deltaproteobacteria']
49	1106113$$[u'k__Bacteria', u'p__Actinobacteria', u'c__Actinobacteria', u'o__Actinomycetales', u'f__Micrococcaceae', u'g__Arthrobacter']
50	749563$$[u'k__Bacteria', u'p__Actinobacteria', u'c__Actinobacteria', u'o__Actinomycetales', u'f__Microbacteriaceae']
51	3608294$$[u'k__Bacteria', u'p__Proteobacteria', u'c__Deltaproteobacteria', u'o__Myxococcales', u'f__', u'g__', u's__']
52	310212$$[u'k__Bacteria', u'p__Proteobacteria', u'c__Alphaproteobacteria', u'o__Rhizobiales', u'f__Rhodobiaceae', u'g__Afifella', u's__']
53	325796$$[u'k__Bacteria', u'p__Chloroflexi', u'c__TK10', u'o__B07_WMSP1', u'f__FFCH4570', u'g__', u's__']
54	4417475$$[u'k__Bacteria', u'p__Proteobacteria', u'c__Alphaproteobacteria', u'o__Ellin329', u'f__', u'g__', u's__']
55	210024$$[u'k__Bacteria', u'p__Proteobacteria', u'c__Alphaproteobacteria', u'o__', u'f__', u'g__', u's__']
56	4022282$$[u'k__Bacteria', u'p__Planctomycetes', u'c__vadinHA49', u'o__DH61', u'f__', u'g__', u's__']
57	570595$$[u'k__Bacteria', u'p__Acidobacteria', u'c__Solibacteres', u'o__Solibacterales', u'f__', u'g__', u's__']
58	1076376$$[u'k__Bacteria', u'p__Proteobacteria', u'c__Alphaproteobacteria', u'o__Rhizobiales', u'f__Rhizobiaceae']
59	897420$$[u'k__Bacteria', u'p__Proteobacteria', u'c__Gammaproteobacteria', u'o__', u'f__', u'g__', u's__']
60	54353$$[u'k__Bacteria', u'p__Proteobacteria', u'c__Alphaproteobacteria', u'o__Caulobacterales', u'f__Caulobacteraceae']
61	4456068$$[u'k__Bacteria', u'p__Proteobacteria', u'c__Betaproteobacteria', u'o__Burkholderiales', u'f__Comamonadaceae', u'g__Variovorax', u's__paradoxus']
62	4308300$$[u'k__Bacteria', u'p__Acidobacteria', u'c__[Chloracidobacteria]', u'o__RB41', u'f__Ellin6075', u'g__', u's__']
63	858813$$[u'k__Bacteria', u'p__Acidobacteria', u'c__Acidobacteria-6', u'o__iii1-15', u'f__RB40', u'g__', u's__']
64	79038$$[u'k__Bacteria', u'p__Acidobacteria', u'c__Acidobacteria-6', u'o__iii1-15', u'f__', u'g__', u's__']
65	1105944$$[u'k__Bacteria', u'p__Proteobacteria', u'c__Gammaproteobacteria', u'o__Pseudomonadales', u'f__Pseudomonadaceae', u'g__Pseudomonas', u's__']
66	1143820$$[u'k__Bacteria', u'p__Proteobacteria', u'c__Betaproteobacteria', u'o__Burkholderiales', u'f__Comamonadaceae']
67	822282$$[u'k__Bacteria', u'p__Acidobacteria', u'c__[Chloracidobacteria]', u'o__11-24', u'f__', u'g__', u's__']
68	559030$$[u'k__Bacteria', u'p__Firmicutes', u'c__Bacilli', u'o__Bacillales']
69	4347970$$[u'k__Bacteria', u'p__Proteobacteria', u'c__Deltaproteobacteria', u'o__Myxococcales', u'f__Haliangiaceae', u'g__', u's__']
70	4406766$$[u'k__Bacteria', u'p__Proteobacteria', u'c__Betaproteobacteria', u'o__Burkholderiales', u'f__Comamonadaceae']
71	4423990$$[u'k__Bacteria', u'p__Planctomycetes', u'c__', u'o__', u'f__', u'g__', u's__']
72	4442627$$[u'k__Bacteria', u'p__Proteobacteria', u'c__Gammaproteobacteria']
73	4333253$$[u'k__Bacteria', u'p__Proteobacteria', u'c__Betaproteobacteria', u'o__', u'f__', u'g__', u's__']
74	1122863$$[u'k__Bacteria', u'p__Proteobacteria', u'c__Alphaproteobacteria', u'o__Rhizobiales', u'f__Hyphomicrobiaceae', u'g__Devosia', u's__']
75	2655357$$[u'k__Bacteria', u'p__Proteobacteria', u'c__Betaproteobacteria', u'o__Burkholderiales', u'f__Comamonadaceae', u'g__Azohydromonas', u's__']
76	333120$$[u'k__Bacteria', u'p__Chloroflexi', u'c__Anaerolineae', u'o__SBR1031', u'f__oc28', u'g__', u's__']
77	113782$$[u'k__Bacteria', u'p__Acidobacteria', u'c__Acidobacteria-6', u'o__iii1-15', u'f__RB40', u'g__', u's__']
78	4469134$$[u'k__Bacteria', u'p__Proteobacteria', u'c__Deltaproteobacteria', u'o__Myxococcales', u'f__Polyangiaceae', u'g__', u's__']
79	New.ReferenceOTU1085$$[u'k__Bacteria', u'p__Planctomycetes', u'c__OM190', u'o__CL500-15', u'f__', u'g__', u's__']
80	New.ReferenceOTU290$$[u'k__Bacteria', u'p__Proteobacteria', u'c__Betaproteobacteria', u'o__IS-44', u'f__', u'g__', u's__']
81	New.ReferenceOTU2038$$[u'k__Bacteria', u'p__Proteobacteria', u'c__Alphaproteobacteria', u'o__Rhizobiales', u'f__Rhodobiaceae']
82	New.ReferenceOTU1890$$[u'k__Bacteria', u'p__Proteobacteria', u'c__Alphaproteobacteria', u'o__Rhizobiales', u'f__Hyphomicrobiaceae', u'g__Pedomicrobium', u's__']
83	New.ReferenceOTU2517$$[u'k__Bacteria', u'p__OD1', u'c__ZB2', u'o__', u'f__', u'g__', u's__']
84	New.ReferenceOTU2685$$[u'k__Bacteria', u'p__Proteobacteria', u'c__Betaproteobacteria', u'o__MND1', u'f__', u'g__', u's__']
85	New.ReferenceOTU1657$$[u'k__Bacteria', u'p__Spirochaetes', u'c__Spirochaetes', u'o__Spirochaetales', u'f__Spirochaetaceae', u'g__Spirochaeta', u's__aurantia']
86	New.ReferenceOTU2001$$[u'k__Bacteria', u'p__Chloroflexi', u'c__Anaerolineae', u'o__SBR1031', u'f__oc28', u'g__', u's__']
87	New.ReferenceOTU2496$$[u'k__Bacteria', u'p__Chloroflexi', u'c__Anaerolineae', u'o__Caldilineales', u'f__Caldilineaceae', u'g__', u's__']
88	New.ReferenceOTU909$$[u'k__Bacteria', u'p__Proteobacteria', u'c__Gammaproteobacteria', u'o__Xanthomonadales', u'f__Sinobacteraceae']
89	New.ReferenceOTU2485$$[u'k__Bacteria', u'p__Proteobacteria', u'c__Alphaproteobacteria', u'o__Rhizobiales', u'f__Hyphomicrobiaceae', u'g__Pedomicrobium', u's__']
90	New.ReferenceOTU2065$$[u'k__Bacteria', u'p__Nitrospirae', u'c__Nitrospira', u'o__Nitrospirales', u'f__0319-6A21', u'g__', u's__']
91	New.ReferenceOTU1755$$[u'k__Bacteria', u'p__Proteobacteria', u'c__Alphaproteobacteria']
92	New.ReferenceOTU2475$$[u'k__Bacteria', u'p__WS3', u'c__PRR-12', u'o__Sediment-1', u'f__', u'g__', u's__']
93	New.ReferenceOTU219$$[u'k__Bacteria', u'p__Proteobacteria', u'c__Alphaproteobacteria', u'o__Rhizobiales', u'f__Rhizobiaceae', u'g__Agrobacterium', u's__']
94	New.ReferenceOTU1568$$[u'k__Bacteria', u'p__Verrucomicrobia', u'c__[Spartobacteria]', u'o__[Chthoniobacterales]', u'f__[Chthoniobacteraceae]', u'g__DA101', u's__']
95	New.ReferenceOTU1365$$[u'k__Bacteria', u'p__Planctomycetes', u'c__vadinHA49', u'o__DH61', u'f__', u'g__', u's__']
96	New.ReferenceOTU373$$[u'k__Bacteria', u'p__Proteobacteria', u'c__Betaproteobacteria', u'o__Ellin6067', u'f__', u'g__', u's__']
97	New.ReferenceOTU2593$$[u'k__Bacteria', u'p__Actinobacteria', u'c__Thermoleophilia', u'o__Gaiellales', u'f__Gaiellaceae', u'g__', u's__']
98	New.ReferenceOTU31$$[u'k__Bacteria', u'p__Proteobacteria', u'c__Deltaproteobacteria', u'o__Myxococcales', u'f__', u'g__', u's__']
99	New.ReferenceOTU1396$$[u'k__Bacteria', u'p__Actinobacteria', u'c__Thermoleophilia', u'o__Gaiellales', u'f__Gaiellaceae', u'g__', u's__']
100	New.ReferenceOTU2455$$[u'k__Bacteria', u'p__Proteobacteria', u'c__Alphaproteobacteria', u'o__Rhizobiales', u'f__', u'g__', u's__']
101	New.ReferenceOTU524$$[u'k__Bacteria', u'p__Actinobacteria', u'c__Acidimicrobiia', u'o__Acidimicrobiales', u'f__C111', u'g__', u's__']
102	New.ReferenceOTU2096$$[u'k__Bacteria', u'p__Proteobacteria', u'c__Deltaproteobacteria', u'o__Myxococcales', u'f__', u'g__', u's__']
103	New.ReferenceOTU228$$[u'k__Bacteria', u'p__Bacteroidetes', u'c__[Saprospirae]', u'o__[Saprospirales]', u'f__Chitinophagaceae', u'g__', u's__']
104	New.ReferenceOTU1622$$[u'k__Bacteria', u'p__Chlamydiae', u'c__Chlamydiia']
105	New.ReferenceOTU1026$$[u'k__Bacteria', u'p__Gemmatimonadetes', u'c__Gemm-1', u'o__', u'f__', u'g__', u's__']
106	New.ReferenceOTU1446$$[u'k__Bacteria', u'p__Proteobacteria', u'c__Deltaproteobacteria', u'o__Myxococcales', u'f__', u'g__', u's__']
107	New.ReferenceOTU2094$$[u'k__Bacteria', u'p__Proteobacteria', u'c__Gammaproteobacteria', u'o__Xanthomonadales', u'f__Xanthomonadaceae', u'g__', u's__']
108	New.ReferenceOTU1201$$[u'k__Bacteria', u'p__Bacteroidetes', u'c__[Saprospirae]', u'o__[Saprospirales]', u'f__Saprospiraceae', u'g__', u's__']
109	New.ReferenceOTU2167$$[u'k__Bacteria', u'p__Proteobacteria', u'c__Alphaproteobacteria', u'o__Sphingomonadales', u'f__Sphingomonadaceae', u'g__Sphingobium', u's__xenophagum']
110	New.ReferenceOTU1146$$[u'k__Bacteria', u'p__Actinobacteria', u'c__Actinobacteria', u'o__Actinomycetales', u'f__Pseudonocardiaceae', u'g__Pseudonocardia', u's__']
111	New.ReferenceOTU1521$$[u'k__Bacteria', u'p__Proteobacteria', u'c__Alphaproteobacteria', u'o__Rhodospirillales', u'f__', u'g__', u's__']
112	New.ReferenceOTU2399$$[u'k__Bacteria', u'p__Proteobacteria', u'c__Alphaproteobacteria', u'o__Sphingomonadales', u'f__Sphingomonadaceae', u'g__Sphingobium']
113	New.ReferenceOTU246$$[u'k__Bacteria', u'p__Acidobacteria', u'c__RB25', u'o__', u'f__', u'g__', u's__']
114	New.ReferenceOTU2779$$[u'k__Bacteria', u'p__Actinobacteria', u'c__Acidimicrobiia', u'o__Acidimicrobiales', u'f__EB1017', u'g__', u's__']
115	New.ReferenceOTU2081$$[u'k__Bacteria', u'p__Bacteroidetes', u'c__Cytophagia', u'o__Cytophagales', u'f__Cytophagaceae', u'g__', u's__']
116	New.ReferenceOTU1040$$[u'k__Bacteria', u'p__Actinobacteria', u'c__Thermoleophilia', u'o__Gaiellales', u'f__', u'g__', u's__']
117	New.ReferenceOTU1985$$[u'k__Bacteria', u'p__Bacteroidetes', u'c__[Saprospirae]', u'o__[Saprospirales]', u'f__Chitinophagaceae']
118	New.ReferenceOTU1142$$[u'k__Bacteria', u'p__Bacteroidetes', u'c__[Saprospirae]', u'o__[Saprospirales]', u'f__', u'g__', u's__']
119	New.ReferenceOTU65$$[u'k__Bacteria', u'p__Proteobacteria', u'c__Betaproteobacteria', u'o__MND1', u'f__', u'g__', u's__']
120	New.ReferenceOTU467$$[u'k__Bacteria', u'p__Proteobacteria', u'c__Betaproteobacteria', u'o__', u'f__', u'g__', u's__']
121	New.CleanUp.ReferenceOTU7997$$[u'k__Bacteria', u'p__Acidobacteria', u'c__Acidobacteria-6', u'o__CCU21', u'f__', u'g__', u's__']
122	New.CleanUp.ReferenceOTU11717$$[u'k__Bacteria', u'p__Acidobacteria', u'c__Acidobacteria-6', u'o__CCU21', u'f__', u'g__', u's__']
123	New.CleanUp.ReferenceOTU21081$$[u'k__Bacteria', u'p__OD1', u'c__ZB2', u'o__', u'f__', u'g__', u's__']
124	New.CleanUp.ReferenceOTU24314$$[u'k__Bacteria', u'p__Proteobacteria', u'c__Betaproteobacteria', u'o__Burkholderiales', u'f__Comamonadaceae']
125	New.CleanUp.ReferenceOTU34612$$[u'k__Bacteria', u'p__Planctomycetes', u'c__C6', u'o__d113', u'f__', u'g__', u's__']
126	New.CleanUp.ReferenceOTU51961$$[u'k__Bacteria', u'p__Bacteroidetes', u'c__[Saprospirae]', u'o__[Saprospirales]', u'f__Chitinophagaceae', u'g__Niabella', u's__']
127	New.CleanUp.ReferenceOTU52050$$[u'k__Bacteria', u'p__Bacteroidetes']
128	New.CleanUp.ReferenceOTU54695$$[u'k__Bacteria', u'p__Proteobacteria', u'c__Deltaproteobacteria', u'o__Myxococcales', u'f__', u'g__', u's__']
129	New.CleanUp.ReferenceOTU75154$$[u'k__Bacteria', u'p__Proteobacteria', u'c__Gammaproteobacteria']
130	New.CleanUp.ReferenceOTU80173$$[u'k__Bacteria', u'p__Planctomycetes', u'c__Planctomycetia', u'o__Pirellulales', u'f__Pirellulaceae', u'g__A17', u's__']
131	New.CleanUp.ReferenceOTU86053$$[u'k__Bacteria', u'p__TM7', u'c__TM7-1', u'o__', u'f__', u'g__', u's__']
132	New.CleanUp.ReferenceOTU102109$$[u'k__Bacteria', u'p__Proteobacteria', u'c__Alphaproteobacteria', u'o__Rhizobiales', u'f__Rhizobiaceae']
133	New.CleanUp.ReferenceOTU106164$$[u'k__Bacteria', u'p__Proteobacteria', u'c__Deltaproteobacteria', u'o__Myxococcales', u'f__', u'g__', u's__']
134	New.CleanUp.ReferenceOTU110684$$[u'k__Bacteria', u'p__Proteobacteria', u'c__Gammaproteobacteria', u'o__Xanthomonadales', u'f__Xanthomonadaceae', u'g__Rhodanobacter', u's__']
[truncated: 509 more rows]
