# Supplementary material for: Plant Nutrient Resource Use Strategies Shape Active Rhizosphere Microbiota Through Root Exudation
Source: PubMed Central journal article supplement (PMC6265440; doi:10.3389/fpls.2018.01662), 2018-11-23
Supplement: Table_1.pdf [file Table_1.pdf]

**Table S1.**

| <b>Compartment</b> | <b>Alpha</b> |        | <b>Inverse Simpson</b> |       |
|--------------------|--------------|--------|------------------------|-------|
|                    | Mean         | SE     | Mean                   | SE    |
| <b>SC_light</b>    | 314.67       | 10.66  | 148.88                 | 14.43 |
| <b>SC_heavy</b>    | 297.33       | 6.22   | 122.06                 | 39.77 |
| <b>SC_roots</b>    | 128.67       | 12.43  | 22.42                  | 3.28  |
| <b>FP_light</b>    | 293.33       | 4.82   | 118.78                 | 3.60  |
| <b>FP_heavy</b>    | 211.67       | 102.40 | 97.45                  | 53.79 |
| <b>FP_roots</b>    | 125.33       | 35.28  | 24.68                  | 6.69  |
| <b>AO_light</b>    | 301.67       | 10.00  | 134.79                 | 10.95 |
| <b>AO_heavy</b>    | 299.33       | 6.90   | 131.77                 | 24.74 |
| <b>AO_roots</b>    | 118.33       | 10.07  | 8.64                   | 0.79  |
| <b>BE_light</b>    | 291.67       | 16.64  | 118.97                 | 27.92 |
| <b>BE_heavy</b>    | 257.00       | 72.43  | 101.47                 | 58.71 |
| <b>BE_roots</b>    | 175.00       | 16.94  | 38.74                  | 18.95 |
| <b>DG_light</b>    | 316.33       | 8.56   | 144.32                 | 10.30 |
| <b>DG_heavy</b>    | 295.67       | 18.01  | 151.50                 | 13.78 |
| <b>DG_roots</b>    | 182.33       | 17.26  | 57.13                  | 19.82 |
| <b>TF_light</b>    | 309.00       | 5.00   | 132.98                 | 11.77 |
| <b>TF_heavy</b>    | 283.67       | 61.96  | 114.30                 | 76.06 |
| <b>TF_roots</b>    | 174.67       | 21.92  | 42.07                  | 16.96 |
| <b>BS_light</b>    | 306.33       | 5.45   | 147.79                 | 12.10 |
| <b>BS_heavy</b>    | 297.33       | 4.03   | 121.31                 | 14.53 |
